# Supplementary material for: T cells discriminate between groups C1 and C2 HLA-C
Source: eLife. 2022 May 19;11:e75670. doi: 10.7554/eLife.75670 (PMC9177145; doi:10.7554/eLife.75670)
Supplement: Figure 1—source data 1. [file elife-75670-fig1-data1.xlsx]

## Sheet: 1C
[Peptide] mM	C0802-G12D-9mer		C05-G12D-9mer		C0802-WT-9mer		C0501-WT-9mer
200	0.377	0.24	0.161	0.102	0.084		0.033
20	1.152	1.017	0.012	0.015
2	1.154	1.103	0.022	0.052
0.2	0.992	0.884	0.014	0.009
0.02	0.474	0.332	0.015	0.042
0.002	0.049	0.031	0.011	0.031

## Sheet: 1D
TCR10 IL2 (OD 450)
[Peptide] mM	C0802-G12D-10mer		C05-G12D-10mer		C0802-WT-10mer		C0501-WT-10mer
200	0.47	0.49	0.586	0.527		0.019	0.059
20	1.107	1.148	0.173	0.186
2	0.715	0.819	0.043	0.047
0.2	0.429	0.491	0.035	0.032
0.02	0.075	0.087	0.031	0.034
0.002	0.043	0.059	0.033	0.033
