# Supplementary material for: T cells discriminate between groups C1 and C2 HLA-C
Source: eLife. 2022 May 19;11:e75670. doi: 10.7554/eLife.75670 (PMC9177145; doi:10.7554/eLife.75670)
Supplement: Figure 2—source data 1. [file elife-75670-fig2-data1.xlsx]

## Sheet: 2B
	C*08:02 (b2m MdFI, relative to cells with no peptide (np))
Exp	NP:	WT9:	WT10:	G12D-9mer:	G12D-10mer:	A18L:
1	1	0.905653	0.870476	1.93046	2.5061	4.35319
2	1	0.886114	0.907592	1.28122	1.40809	2.37313
3	1	0.787498	0.914698	2.182	2.55287	3.87029
4	1	0.810688	0.893776	1.53926	1.78332	2.32682
5	1	0.936098	0.954295	1.31824	1.54211	3.36437
6	1	0.775114	0.899324	1.67313	1.23513	1.59621
	C*05:01
Exp	NP	WT9	WT10	G12D-9mer	G12D-10mer	A18L
1	1	0.873832	0.883178	0.939252	2.45794
2	1	0.893258	0.808989	0.898876	2.21348
3	1	0.867925	0.842767	0.899371	2.06918
4	1	0.788732	0.859155	0.859155	2.03521
5	1	0.890244	0.847561	0.865854	1.59756
6	1	0.95092	0.96319	0.969325	2.11656	3.18405
7	1	0.927632	0.934211	0.953947	1.17105	2.59211
8	1	0.895028	0.861878	0.939227	2.0442	3.35359
9	1	0.828402	0.83432	0.869822	1.89941	2.81065

## Sheet: 2C
TCR9a IL2 (OD 450)
[Peptide] mM	C05-A18L-9mer		C05-G12D-9mer		C05-WT-9mer
200	0.233	0.364	0.161	0.102	0.033
20	1.136	1.495	0.012	0.015
2	0.693	0.988	0.022	0.052
0.2	0.369	0.456	0.014	0.009
0.02	0.06	0.078	0.015	0.042
0.002	0.023	0.033	0.011	0.031

## Sheet: 2D
pW Freq (%)	L	V	I	F	M	A	P	T	Y	H	C	E	K	N	Q	R	S	W	D	G
C*05:01	37.2951	20.082	8.19672	25.1366	7.9235	0.136612	0	0.136612	0.136612	0.136612	0	0	0	0	0	0	0.273224	0.409836	0	0.136612
C*08:02	73.9678	7.45216	7.30111	4.88419	3.32326	1.51057	0.302115	0.302115	0.251762	0.151057	0.100705	0.100705	0.100705	0.050352	0.050352	0.050352	0.050352	0.050352	0	0

## Sheet: 2E
pW Freq (%)	C*08:02	C*05:01
Ala	1.51057	0.136612

## Sheet: 2F
pW	Fold change	-Log10(P)
A	-2.39893	2.01037
C	1.42709	0.73962
D	0.678229	0.163279
E	0.215999	0.087718
F	0.174673	0.127587
G	-2.49638	1.1468
H	-4.2299	1.1485
I	1.20614	1.32818
K	-1.00346	0.640603
L	-0.13471	0.189146
M	-0.38561	0.504831
N		0.892301
P	-1.48597	0.944927
Q	-1.97912	1.46572
R	-0.74469	0.580137
S	-1.53996	1.65945
T	-1.27756	1.22585
V	1.41102	1.06084
W	-0.59686	0.320418
Y	-1.15707	0.670597

## Sheet: 2G
pW Ala freq	C1	C2
	0.999334	0.110314
	1.5625	0.617978
	1.13344	0.312012
	0.598131	0.103734
	0.910273	0.299581
	0.353357	0.37714
	1.06383	0.107411
	6.08255
	0.97423
	2.10158
	2.17949
	0.296443
	1.38351
	0.700117
