# Supplementary material for: T cells discriminate between groups C1 and C2 HLA-C
Source: eLife. 2022 May 19;11:e75670. doi: 10.7554/eLife.75670 (PMC9177145; doi:10.7554/eLife.75670)
Supplement: Figure 2—source data 2. [file elife-75670-fig2-data2.xlsx]

## Sheet: C1 peptides
Allele	Length	Peptide		Allele	Length	Peptide		Allele	Length	Peptide		Allele	Length	Peptide		Allele	Length	Peptide		Allele	Length	Peptide		Allele	Length	Peptide		Allele	Length	Peptide		Allele	Length	Peptide		Allele	Length	Peptide		Allele	Length	Peptide		Allele	Length	Peptide		Allele	Length
C0102	9	AAAAATMAL		C0302	9	AAAGGLHEF		C0303	9	AAAAATMAL		C0304	9	AAAAATMAL		C0701	9	AAAPAGTTF		C0702	9	AANPHSFVF		C0704	9	AAAGSPVFL		C0801	9	AAAAANPTL		C0802	9	AAAAPRAVA		C1202	9	AAAAAAAAI		C1203	9	AAAALHPAL		C1402	9	AFADYVSTM		C1403	9
C0102	9	AANFSDRSL		C0302	9	AAANPTLAF		C0303	9	AAAAPRAVA		C0304	9	AAAALHPAL		C0701	9	AANKTIIYL		C0702	9	AAPAYSRAL		C0704	9	AAAHFYFEL		C0801	9	AAAAATMAL		C0802	9	AAADASPSL		C1202	9	AAAAAAATM		C1203	9	AAAALVLKA		C1402	9	AFALVSQAY		C1403	9
C0102	9	AAPAGTTFV		C0302	9	AAAPLLPMI		C0303	9	AAAAPSPVL		C0304	9	AAAAPPLTL		C0701	9	AANPHSFVF		C0702	9	AAPEGAGAL		C0704	9	AAAPHLLLL		C0801	9	AAAALHPAL		C0802	9	AAAGSPLSL		C1202	9	AAAAAQSVY		C1203	9	AAAAVIPTV		C1402	9	AFATPTISL		C1403	9
C0102	9	AAPALASSL		C0302	9	AAAPSLLIL		C0303	9	AAAAVGGAL		C0304	9	AAAAPSPVL		C0701	9	AAPALASSL		C0702	9	AAPTAQKSL		C0704	9	AAAPSLLIL		C0801	9	AAAAPRAVA		C0802	9	AAAGSPVFL		C1202	9	AAAAGLAVY		C1203	9	AAADIFKHY		C1402	9	AFEDYVQSM		C1403	9
C0102	9	AAPAPTAVV		C0302	9	AAAVPRAAF		C0303	9	AAAAVGLAL		C0304	9	AAADVLEAL		C0701	9	AAPTSAAAL		C0702	9	AAPTSAAAL		C0704	9	AAASHFFNL		C0801	9	AAAAPSPVL		C0802	9	AACGGHVEL		C1202	9	AAAALPTLY		C1203	9	AAADIVNFL		C1402	9	AFFGGSNPF		C1403	9
C0102	9	AAPAYSRAL		C0302	9	AAFADALEF		C0303	9	AAADVLEAL		C0304	9	AAAGSPLSL		C0701	9	AAPVPTTTL		C0702	9	AAPVPTTTL		C0704	9	AAAVQAFYL		C0801	9	AAAAPSPVM		C0802	9	AADAALRVL		C1202	9	AAAAPRAVA		C1203	9	AAADSIKIW		C1402	9	AFHLRVLAH		C1403	9
C0102	9	AAPDGTRNL		C0302	9	AAFDFPTSF		C0303	9	AAAGSPLSL		C0304	9	AAAHFYFEL		C0701	9	AFNPEPLVL		C0702	9	AAQDRDQIY		C0704	9	AAGSHVIIL		C0801	9	AAAAVGPAM		C0802	9	AADAEPLEI		C1202	9	AAAAVGGAL		C1203	9	AAAFQPLII		C1402	9	AFIAQALCL		C1403	9
C0102	9	AAPEGAGAL		C0302	9	AAFDNFKEV		C0303	9	AAAGVFALL		C0304	9	AAAIKALEL		C0701	9	AMYPHIFYF		C0702	9	AFKDVSFSL		C0704	9	AAHDALVEL		C0801	9	AAADASPSL		C0802	9	AADAKPESL		C1202	9	AAAAVGLAL		C1203	9	AAAGLHRYL		C1402	9	AFIDQSQSL		C1403	9
C0102	9	AAPESGLEV		C0302	9	AAFQGFPSM		C0303	9	AAAHFYFEL		C0304	9	AAANPTLAF		C0701	9	AMYVHAYTL		C0702	9	AKADVPYIL		C0704	9	AAHPGPIVV		C0801	9	AAADITSSL		C0802	9	AADDDVKCL		C1202	9	AAADHHSLY		C1203	9	AAAGWLLRL		C1402	9	AFIDTAQHM		C1403	9
C0102	9	AAPESSTSF		C0302	9	AAFTRALEY		C0303	9	AAAIKALEL		C0304	9	AAAPEYKTL		C0701	9	ANKYQVFFF		C0702	9	AKAGVYYVF		C0704	9	AAHTQATLL		C0801	9	AAADVLEAL		C0802	9	AADDFLEDL		C1202	9	AAADITSSL		C1203	9	AAAHFYFEL		C1402	9	AFIFRSLNL		C1403	9
C0102	9	AAPESYEEL		C0302	9	AAFWAFTVF		C0303	9	AAANPTLAF		C0304	9	AAAPHLLLL		C0701	9	ANSSIRPIF		C0702	9	AKAPPTACY		C0704	9	AAHVSRVIL		C0801	9	AAAGDHVSL		C0802	9	AADDHQALI		C1202	9	AAADPKVAF		C1203	9	AAAIGLVIY		C1402	9	AFIHISTAY		C1403	9
C0102	9	AAPFPRGEL		C0302	9	AAIASLLYL		C0303	9	AAAPAAPTL		C0304	9	AAAPPSPAW		C0701	9	AQNRFLLEL		C0702	9	AKFSLPVSL		C0704	9	AAIASLLYL		C0801	9	AAAGGHEPL		C0802	9	AADDHTVKL		C1202	9	AAAEIYEEF		C1203	9	AAAKALRIL		C1402	9	AFIITGQTY		C1403	9
C0102	9	AAPFSYHST		C0302	9	AAIAVLEEL		C0303	9	AAAPAGTTF		C0304	9	AAAPQSLEF		C0701	9	ARADFQKVL		C0702	9	AKNNVVINY		C0704	9	AAIDHQIEV		C0801	9	AAAGPGEVL		C0802	9	AADDIHRSL		C1202	9	AAAEVAGQF		C1203	9	AAAKNIRVW		C1402	9	AFIQEAAAF		C1403	9
C0102	9	AAPGEFRAI		C0302	9	AAIDPRVQY		C0303	9	AAAPHLLLL		C0304	9	AAAPSLLIL		C0701	9	ARAHSIQIM		C0702	9	AKQDVVLNY		C0704	9	AAIWFRTYL		C0801	9	AAAHFYFEL		C0802	9	AADDLYSML		C1202	9	AAAEVLQVY		C1203	9	AAANAIRVY		C1402	9	AFISHTSVL		C1403	9
C0102	9	AAPGGWLQV		C0302	9	AAIGLVIYY		C0303	9	AAAPPSPAW		C0304	9	AAASAFTSL		C0701	9	ARAPGTRTL		C0702	9	AKSDVTNQL		C0704	9	AAIYHVLHF		C0801	9	AAAKCLLEL		C0802	9	AADDSKLVL		C1202	9	AAAGGLHEF		C1203	9	AAANLTKIV		C1402	9	AFISKVSTH		C1403	9
C0102	9	AAPGPSAAF		C0302	9	AAIKPGTPL		C0303	9	AAAPSLLIL		C0304	9	AAASHFFNL		C0701	9	ARCDFALFL		C0702	9	AQVTVVVAQ		C0704	9	AALDKATVL		C0801	9	AAAKTFEQL		C0802	9	AADDSSVKL		C1202	9	AAAGPGAAL		C1203	9	AAAPHLLLL		C1402	9	AFISLAKTL		C1403	9
C0102	9	AAPHSIESF		C0302	9	AALLFVEAF		C0303	9	AAASAFTSL		C0304	9	AAASPLLLL		C0701	9	ARCPSPKLL		C0702	9	ARADFQKVL		C0704	9	AALPKATIL		C0801	9	AAAPAGTTF		C0802	9	AADEITHCI		C1202	9	AAAGPGEVL		C1203	9	AAAPIISSV		C1402	9	AFKEVGIEF		C1403	9
C0102	9	AAPIAITCF		C0302	9	AALPFTKSL		C0303	9	AAASHFFNL		C0304	9	AAATSALLL		C0701	9	ARDDTHYLL		C0702	9	ARADSYYEY		C0704	9	AAMDAEIVL		C0801	9	AAAPASGAL		C0802	9	AADEPVTVL		C1202	9	AAAGVFALL		C1203	9	AAAPLRLIA		C1402	9	AFLAEASVM		C1403	9
C0102	9	AAPIRLLAA		C0302	9	AALPIFSSF		C0303	9	AAAYPHTSL		C0304	9	AAAVPRAAF		C0701	9	ARDPGARVL		C0702	9	ARAGVSQVL		C0704	9	AAMKNVTEL		C0801	9	AAAPASGEM		C0802	9	AADEVLAVL		C1202	9	AAAHCAHVF		C1203	9	AAAPQLLIV		C1402	9	AFLEAADNL		C1403	9
C0102	9	AAPLSGQTF		C0302	9	AALPKATIL		C0303	9	AACDYIREL		C0304	9	AADAALRVL		C0701	9	ARFGSVNEL		C0702	9	ARAHSIQIM		C0704	9	AAMSHLLEM		C0801	9	AAAPHLLLL		C0802	9	AADEVREKL		C1202	9	AAAHTHPVY		C1203	9	AAAPSLLIL		C1402	9	AFLEQAVSY		C1403	9
C0102	9	AAPPAAQTL		C0302	9	AALPVYQEL		C0303	9	AACETFLKL		C0304	9	AADPQIRQF		C0701	9	ARGPLRQTF		C0702	9	ARAPGTRTL		C0704	9	AANKTIIYL		C0801	9	AAAPPAKEI		C0802	9	AADFAQMEL		C1202	9	AAAKIQASF		C1203	9	AAAPVIKAY		C1402	9	AFLGEANVM		C1403	9
C0102	9	AAPPAGGTL		C0302	9	AAMKALQAL		C0303	9	AACPYFKSM		C0304	9	AADPVSPLL		C0701	9	ARGQYVKFL		C0702	9	ARAYEPQEL		C0704	9	AANPHSFVF		C0801	9	AAAPPAPAA		C0802	9	AADFEIGHF		C1202	9	AAALPSNSF		C1203	9	AAASFPWSA		C1402	9	AFLKTALEM		C1403	9
C0102	9	AAPPWALGL		C0302	9	AAMSHLLEM		C0303	9	AADPQIRQF		C0304	9	AADWHNLIL		C0701	9	ARHSLLQTL		C0702	9	ARCDFALFL		C0704	9	AANPIQFTL		C0801	9	AAAPQLLIV		C0802	9	AADFVKAFI		C1202	9	AAANAIRVY		C1203	9	AAASIANIV		C1402	9	AFMDQVRAF		C1403	9
C0102	9	AAPRAPSAL		C0302	9	AANLFAQTY		C0303	9	AADPVSPLL		C0304	9	AAEDAIRNL		C0701	9	ARLAETREL		C0702	9	ARDDTHYLL		C0704	9	AANTSTVEL		C0801	9	AAAPSLLIL		C0802	9	AADGKGVVV		C1202	9	AAANPTLAF		C1203	9	AAASLIRLV		C1402	9	AFMEKVRVL		C1403	9
C0102	9	AAPSGSGTL		C0302	9	AANPHSFVF		C0303	9	AADWHNLIL		C0304	9	AAEEGLREL		C0701	9	ARLDLPYEL		C0702	9	ARDPGARVL		C0704	9	AAPAYSRAL		C0801	9	AAAPVLTPA		C0802	9	AADGKLLKL		C1202	9	AAAPAGTTF		C1203	9	AAASLVPVV		C1402	9	AFMSQVHSV		C1403	9
C0102	9	AAPSKACML		C0302	9	AAPIRLLAA		C0303	9	AAEDAIRNL		C0304	9	AAFGKSPEI		C0701	9	ARLKDIIVM		C0702	9	ARFGSVNEL		C0704	9	AAPVPTTTL		C0801	9	AAAQPQPSV		C0802	9	AADGKVQVL		C1202	9	AAAPAPASV		C1203	9	AAATSVHVV		C1402	9	AFNFGSRPL		C1403	9
C0102	9	AAPSPFAEL		C0302	9	AARFVSTPF		C0303	9	AAEEGLREL		C0304	9	AAFPYGGVL		C0701	9	ARLKEVLEY		C0702	9	ARFLFTTGF		C0704	9	AAQQHETFL		C0801	9	AAASAFTSL		C0802	9	AADGPMPFL		C1202	9	AAAPASGEM		C1203	9	AAFADALEF		C1402	9	AFNTQVTAL		C1403	9
C0102	9	AAPTAITEA		C0302	9	AATPVWLLF		C0303	9	AAFAHFPEL		C0304	9	AAFWGQMQM		C0701	9	ARLNWILHF		C0702	9	ARGAFSEEY		C0704	9	AASKVMVEL		C0801	9	AAASHFFNL		C0802	9	AADGPQKLL		C1202	9	AAAPIISSV		C1203	9	AAFAYTVKY		C1402	9	AFNVMGEQF		C1403	9
C0102	9	AAPTAQKSL		C0302	9	AAYVFEDPF		C0303	9	AAFQAALAL		C0304	9	AAGPRPMAL		C0701	9	ARLPLVNSY		C0702	9	ARGLLEEQY		C0704	9	AASPSELHL		C0801	9	AAATDFESL		C0802	9	AADIENRVL		C1202	9	AAAPPAKEI		C1203	9	AAFCKLIVY		C1402	9	AFPDSVNSL		C1403	9
C0102	9	AAPTRPSAL		C0302	9	AGVPLFLLE		C0303	9	AAFWGQMQM		C0304	9	AAGSHVIIL		C0701	9	ARMEFAWIY		C0702	9	ARHEHQVML		C0704	9	AATGHTVVL		C0801	9	AAAYPHTSL		C0802	9	AADIPQTAV		C1202	9	AAAPPALCY		C1203	9	AAFDAAWMV		C1402	9	AFPGASLYL		C1403	9
C0102	9	AAPTSAAAL		C0302	9	AINPKLLQL		C0303	9	AAHMPAAAL		C0304	9	AAHMPAAAL		C0701	9	ARMEFILRH		C0702	9	ARHFLHHYY		C0704	9	AATGVVLDL		C0801	9	AACDILSQL		C0802	9	AADKIHSSF		C1202	9	AAARPKSAF		C1203	9	AAFDGGFTV		C1402	9	AFPIGSSGF		C1403	9
C0102	9	AAPTTGNQI		C0302	9	AIVKPGVPM		C0303	9	AAIAAVNAL		C0304	9	AAIAAVNAL		C0701	9	ARNDYLLTL		C0702	9	ARHVVAVVL		C0704	9	AATSVHVVA		C0801	9	AACDLLQSL		C0802	9	AADKRLTVL		C1202	9	AAASAFTSL		C1203	9	AAFDHICTF		C1402	9	AFPKAVSVF		C1403	9
C0102	9	AAPTVNQFL		C0302	9	AIYDGFDGF		C0303	9	AAIAPPTSL		C0304	9	AAIAFLHAL		C0701	9	ARNEYLLNL		C0702	9	ARHVVKVEY		C0704	9	AATVFCVVL		C0801	9	AACELLHSM		C0802	9	AADLAHITA		C1202	9	AAASIANIV		C1203	9	AAFDKIQQL		C1402	9	AFPNLARVL		C1403	9
C0102	9	AAPVATGAV		C0302	9	ALLSALQAL		C0303	9	AAIASLLYL		C0304	9	AAIAPPTSL		C0701	9	ARNEYLLSL		C0702	9	ARIPFYGSY		C0704	9	AAVEEGIVL		C0801	9	AACETFLKL		C0802	9	AADLGSPSL		C1202	9	AAASKLGEF		C1203	9	AAFDQWREW		C1402	9	AFPYGNVAF		C1403	9
C0102	9	AAPVPTTTL		C0302	9	ASHLHIHVF		C0303	9	AAIASTPTL		C0304	9	AAIASLLYL		C0701	9	ARNLFCLQL		C0702	9	ARIPLNPVL		C0704	9	AAVGHVLVV		C0801	9	AACGGHVEL		C0802	9	AADLKQFCL		C1202	9	AAATGGSVL		C1203	9	AAFEGTVFF		C1402	9	AFQAEIAQL		C1403	9
C0102	9	AAPVSTSEL		C0302	9	ATYIFLQTF		C0303	9	AAIEGNLQL		C0304	9	AAIDHQIEV		C0701	9	ARNPSTVCL		C0702	9	ARLDLPYEL		C0704	9	AAVNHISQL		C0801	9	AACNIYSTL		C0802	9	AADLLVVHL		C1202	9	AAATGLHPA		C1203	9	AAFEKALEV		C1402	9	AFQERLNSY		C1403	9
C0102	9	AAPVVPQAL		C0302	9	AVFGDFEQF		C0303	9	AAIFHYLII		C0304	9	AAIEGNLQL		C0701	9	ARNTVTQVL		C0702	9	ARLTEGCSF		C0704	9	ADALRPSVV		C0801	9	AACRVIARL		C0802	9	AADLPARGF		C1202	9	AAATRTTSF		C1203	9	AAFGAPGII		C1402	9	AFQFSYTAV		C1403	9
C0102	9	AAPWTEETV		C0302	9	AYAIYELAV		C0303	9	AAIHPSLEI		C0304	9	AAIETYNLL		C0701	9	ARPQVSLTF		C0702	9	ARNDYLLTL		C0704	9	ADHIRSIHV		C0801	9	AACSAFATL		C0802	9	AADLPTKPT		C1202	9	AAATYILEA		C1203	9	AAFGDKIFY		C1402	9	AFQHVGKAF		C1403	9
C0102	9	AAPYGIESM		C0302	9	CAIPDLGPA		C0303	9	AAIKAFIAV		C0304	9	AAIFHYLII		C0701	9	ARPRTEVSL		C0702	9	ARNERIYVY		C0704	9	ADLERFFNF		C0801	9	AADAKPESL		C0802	9	AADLSEIEI		C1202	9	AAAVPRAAF		C1203	9	AAFGGFLYF		C1402	9	AFQVLVKSL		C1403	9
C0102	9	AFSPSSDSL		C0302	9	CAIPQVMAI		C0303	9	AAIKPGTPL		C0304	9	AAIHPSLEI		C0701	9	ARRENILVM		C0702	9	ARNPSTVCL		C0704	9	ADLERVLGL		C0801	9	AADDIHRSL		C0802	9	AADLSLHSF		C1202	9	AAAVPTRSY		C1203	9	AAFGRDLFL		C1402	9	AFQVSACAF		C1403	9
C0102	9	AGPGPGAVL		C0302	9	CAMPVAMEF		C0303	9	AAILPDMAL		C0304	9	AAIKAFIAV		C0701	9	ARTVFCMQL		C0702	9	ARNTVTQVL		C0704	9	ADLYRVLGV		C0801	9	AADDSKLVL		C0802	9	AADLSMLVL		C1202	9	AACDLVQRF		C1203	9	AAFHEEFVV		C1402	9	AFYDPTHAW		C1403	9
C0102	9	AGPMRQISL		C0302	9	CASDKILEF		C0303	9	AAINPNHPL		C0304	9	AAIKPGTPL		C0701	9	ARVIFITEY		C0702	9	ARPDATKVL		C0704	9	ADMAHISGL		C0801	9	AADDSSVKL		C0802	9	AADLVEKSF		C1202	9	AAFADALEF		C1203	9	AAFHLALYT		C1402	9	APYIYALLS		C1403	9
C0102	9	AGPPAAAEV		C0302	9	CINGKVLIM		C0303	9	AAIPSAPVL		C0304	9	AAINPNHPL		C0701	9	ASADTAYVL		C0702	9	ARPDINLIL		C0704	9	ADNLRLIQV		C0801	9	AADEITHCI		C0802	9	AADMLGLSL		C1202	9	AAFAGGTSL		C1203	9	AAFHNFIKV		C1402	9	AVLASGATF		C1403	9
C0102	9	AGPPATSEL		C0302	9	CSSPHALVL		C0303	9	AAIPYWLLL		C0304	9	AAINRQINL		C0701	9	ASFHRVWSF		C0702	9	ARPDNWFCY		C0704	9	ADQLRFSYL		C0801	9	AADETAVQL		C0802	9	AADMNECCL		C1202	9	AAFAYTVKY		C1203	9	AAFIWPMLI		C1402	9	AVNIMHSSL		C1403	9
C0102	9	AGPPAVHGL		C0302	9	CTYGKPVTF		C0303	9	AAIQCLQAL		C0304	9	AAIPYWLLL		C0701	9	ASGGHYYSY		C0702	9	ARPEEPIAF		C0704	9	ADSKRAFEL		C0801	9	AADEVLAVL		C0802	9	AADNCLREL		C1202	9	AAFCKLIVY		C1203	9	AAFLGERVF		C1402	9	AWIDGVLDM		C1403	9
C0102	9	AGPPDTISL		C0302	9	CVSPWIVTM		C0303	9	AAISHGRVF		C0304	9	AAISHFLNC		C0701	9	ASHLHIHVF		C0702	9	ARPELLEVF		C0704	9	ADSLRLQQL		C0801	9	AADFAQMEL		C0802	9	AADPSVVNL		C1202	9	AAFDFPTSF		C1203	9	AAFLKAIGY		C1402	9	AYALAGVSF		C1403	9
C0102	9	AGPPHTCPL		C0302	9	EVYDDFLHY		C0303	9	AAISTSRVL		C0304	9	AAISHGRVF		C0701	9	ASLLHPVVY		C0702	9	ARPEPATGY		C0704	9	ADSQRFRQF		C0801	9	AADGKGVVV		C0802	9	AADPSWNSL		C1202	9	AAFDHICTF		C1203	9	AAFLLPVIM		C1402	9	AYALMAHAM		C1403	9
C0102	9	AGPPRCSSL		C0302	9	FAAASFMSY		C0303	9	AAIVAKQVL		C0304	9	AAIVAKQVL		C0701	9	ASLMHSFIL		C0702	9	ARPERPMAF		C0704	9	ADVLKVEVF		C0801	9	AADGKLLKL		C0802	9	AADPVSPLL		C1202	9	AAFFTGQIF		C1203	9	AAFNALVTF		C1402	9	AYEFMSQAF		C1403	9
C0102	9	AGPSHVAAM		C0302	9	FAADIISVL		C0303	9	AAIVPGSQL		C0304	9	AAIVPGSQL		C0701	9	ASNKYLVEF		C0702	9	ARPGCIIAL		C0704	9	AEAQRFARM		C0801	9	AADGQLHTL		C0802	9	AADQAKQLL		C1202	9	AAFPGASLY		C1203	9	AAFPGASLY		C1402	9	AYFPDARDM		C1403	9
C0102	9	AGPSVVNHM		C0302	9	FAADVRLMF		C0303	9	AAIWQYESL		C0304	9	AAIWFRTYL		C0701	9	ASNPAMLLY		C0702	9	ARPGCIIEL		C0704	9	AELERNVAL		C0801	9	AADHTVYKL		C0802	9	AADRCGAAL		C1202	9	AAFPIAVVA		C1203	9	AAFPGENAL		C1402	9	AYFPYFITY		C1403	9
C0102	9	AIIRDRAAL		C0302	9	FAAKFVTSF		C0303	9	AAIYHVLHF		C0304	9	AAIWQYESL		C0701	9	ASPSSIRSL		C0702	9	ARPLEGTSF		C0704	9	AELQRVQKV		C0801	9	AADKGVYII		C0802	9	AADRPGVSL		C1202	9	AAFPLPVVV		C1203	9	AAFPIAVVA		C1402	9	AYGRMGLAL		C1403	9
C0102	9	AINHDTKEL		C0302	9	FAALHGPAL		C0303	9	AAIYLVTSL		C0304	9	AALDIYETL		C0701	9	ASSGHYIAY		C0702	9	ARPLVQTIF		C0704	9	AESLRYKLL		C0801	9	AADLGSPSL		C0802	9	AADSAVRLW		C1202	9	AAFPMASSF		C1203	9	AAFPLAPLL		C1402	9	AYHAVVLSY		C1403	9
C0102	9	AIPDHARQL		C0302	9	FAANVYEAF		C0303	9	AALDIYETL		C0304	9	AALDKATVL		C0701	9	ASSPHGLVM		C0702	9	ARPPAAPEL		C0704	9	AEYIRTEML		C0801	9	AADPEAPEI		C0802	9	AADSKSLVL		C1202	9	AAFPYGGVL		C1203	9	AAFPLPVVV		C1402	9	AYHELAQVY		C1403	9
C0102	9	AIPLHASSL		C0302	9	FAASGGFLH		C0303	9	AALDKATVL		C0304	9	AALFKAWAL		C0701	9	ASTPVAREL		C0702	9	ARPPDPLCL		C0704	9	AGADHIITM		C0801	9	AADPGLHET		C0802	9	AADSPGSGL		C1202	9	AAGEPGTSM		C1203	9	AAFPYGGVL		C1402	9	AYHGLTVPL		C1403	9
C0102	9	AIPLKASVL		C0302	9	FAASVAHLY		C0303	9	AALFKAWAL		C0304	9	AALGRALAM		C0701	9	ATFARIWYL		C0702	9	ARPPFVICV		C0704	9	AGAYHAVVL		C0801	9	AADPSVVNL		C0802	9	AADSPSQNL		C1202	9	AAGPTGMFF		C1203	9	AAFPYPMMH		C1402	9	AYIFNSNVM		C1403	9
C0102	9	ALGDPASAL		C0302	9	FAATHSLEF		C0303	9	AALPCGHSL		C0304	9	AALPFTKSL		C0701	9	ATIAIAYIM		C0702	9	ARPPPLPGL		C0704	9	AGHDQVVVL		C0801	9	AADPVSPLL		C0802	9	AADSWYLAL		C1202	9	AAGPVGMAA		C1203	9	AAFQEAFYV		C1402	9	AYIGGICSL		C1403	9
C0102	9	ALIPETTTL		C0302	9	FAATLEQVY		C0303	9	AALPKATIL		C0304	9	AALPKATIL		C0701	9	ATISYILTL		C0702	9	ARPPSVDSL		C0704	9	AGHPHIITL		C0801	9	AADRCGAAL		C0802	9	AADSYFSLL		C1202	9	AAHLPTQPH		C1203	9	AAFQHLLLL		C1402	9	AYIMKRMDM		C1403	9
C0102	9	ALPEAIAAL		C0302	9	FADGFVLVY		C0303	9	AALPLALVL		C0304	9	AALPLALVL		C0701	9	ATNAAVTVL		C0702	9	ARPPVLAKL		C0704	9	AGLTHIITM		C0801	9	AADRPGVSL		C0802	9	AADVILKTL		C1202	9	AAHTVTAAY		C1203	9	AAFQYGIKM		C1402	9	AYINKVEEL		C1403	9
C0102	9	ALPEEVQEL		C0302	9	FADGHVLEL		C0303	9	AALPPVSPL		C0304	9	AALPVYQEL		C0701	9	ATNKITIIF		C0702	9	ARPSPCYQL		C0704	9	AGMPTAYDL		C0801	9	AADSSPSEL		C0802	9	AADWHNLIL		C1202	9	AAHVAGAAY		C1203	9	AAFSKLIIY		C1402	9	AYINRASLL		C1403	9
C0102	9	ALPEWISCL		C0302	9	FADGVILLL		C0303	9	AALPVYQEL		C0304	9	AALVPRQAL		C0701	9	ATNPESKVF		C0702	9	ARPSVLWCY		C0704	9	AGQDAVIVL		C0801	9	AADWHNLIL		C0802	9	AADYSQLEL		C1202	9	AAIEASQSL		C1203	9	AAFSKYLTA		C1402	9	AYKPPGFSL		C1403	9
C0102	9	ALPGFAEAL		C0302	9	FADGVYLVL		C0303	9	AALVPRQAL		C0304	9	AALWRFAEL		C0701	9	ATNPISRVL		C0702	9	ARPTAPFTL		C0704	9	AGQEAIFIL		C0801	9	AADYSQLEL		C0802	9	AAEAAEVIL		C1202	9	AAIEFISKM		C1203	9	AAFTLRTQY		C1402	9	AYLAALTQL		C1403	9
C0102	9	ALPLGGKAL		C0302	9	FADPHGKVF		C0303	9	AALWRFAEL		C0304	9	AALYHGMAL		C0701	9	ATNPKPVKL		C0702	9	ARPVLLQVY		C0704	9	AGQESPIIL		C0801	9	AAEEANAVL		C0802	9	AAEAEPRAL		C1202	9	AAIHCGHTF		C1203	9	AAFTRALEY		C1402	9	AYLALRISY		C1403	9
C0102	9	ALPQEFAAL		C0302	9	FAEDSLRVI		C0303	9	AAMASLGAL		C0304	9	AAMEFLQEL		C0701	9	ATSKVALVY		C0702	9	ARRENILVM		C0704	9	AGSPFHPAM		C0801	9	AAEEGLREL		C0802	9	AAEAGAMTL		C1202	9	AAIKPGTPL		C1203	9	AAFVKAVGF		C1402	9	AYLEAHETF		C1403	9
C0102	9	ALPQPTSVL		C0302	9	FAEGFVRAL		C0303	9	AAMEFLQEL		C0304	9	AAMKALQAL		C0701	9	AVLDFCYHL		C0702	9	ARSLKVFEL		C0704	9	AGSPHALEM		C0801	9	AAEQSFAEL		C0802	9	AAEATPVAL		C1202	9	AAINFQPKM		C1203	9	AAFVKKLVY		C1402	9	AYLEALSHL		C1403	9
C0102	9	AMPFKCMQL		C0302	9	FAFDPSVNY		C0303	9	AAMKALQAL		C0304	9	AAMKLMTAL		C0701	9	AVSEAAIIL		C0702	9	ARSRFPQTF		C0704	9	AGVDHRVIL		C0801	9	AAEYGAEAL		C0802	9	AAEEAMKAL		C1202	9	AAISHGRVF		C1203	9	AAFWGQMQM		C1402	9	AYLGSAIQL		C1403	9
C0102	9	ASAPALTLS		C0302	9	FAFEHSEEY		C0303	9	AAMPRIYEL		C0304	9	AAMKNVTEL		C0701	9	AVSPYSIVL		C0702	9	ARTVFCMQL		C0704	9	AIHTAILTL		C0801	9	AAFFAADEL		C0802	9	AAEEANAVL		C1202	9	AAITIQSSY		C1203	9	AAFYGCLYA		C1402	9	AYLIMISAL		C1403	9
C0102	9	ASPAVGQPL		C0302	9	FAFLFNSEL		C0303	9	AAMPVAQHL		C0304	9	AAMMAVRVL		C0701	9	AYKDAIYVF		C0702	9	ARVIFITEY		C0704	9	AIMPYCLHL		C0801	9	AAFFARDEL		C0802	9	AAEEESRVL		C1202	9	AAIWQYESL		C1203	9	AAFYHPVRY		C1402	9	AYLPNGAAL		C1403	9
C0102	9	ASPCGAWAL		C0302	9	FAFPGEILM		C0303	9	AAMSHLLEM		C0304	9	AAMPRIYEL		C0701	9	AYSSYVHQY		C0702	9	ARVPHSLDL		C0704	9	AINELLVEL		C0801	9	AAFGRDLFL		C0802	9	AAEEFKVPA		C1202	9	AAIYHVLHF		C1203	9	AAGTTVKVW		C1402	9	AYLPVNESF		C1403	9
C0102	9	ASPDRTHVL		C0302	9	FAFRNFLYL		C0303	9	AAMYKSLEL		C0304	9	AAMPVAQHL		C0701	9	CRDDIFYIL		C0702	9	ARVPSSLAY		C0704	9	AIQEHPVVL		C0801	9	AAFHQIEAV		C0802	9	AAEEPLSLL		C1202	9	AAKAAGVSF		C1203	9	AAIASLLYL		C1402	9	AYLRSMIPH		C1403	9
C0102	9	ASPEAGNTL		C0302	9	FAFTPSRIY		C0303	9	AANKTIIYL		C0304	9	AAMSHLLEM		C0701	9	CRESGVRNL		C0702	9	ARYPKKIHY		C0704	9	ALHHAVIFL		C0801	9	AAGPPLVAA		C0802	9	AAEEPNAAV		C1202	9	AAKAALEEF		C1203	9	AAIDHQIEV		C1402	9	AYLSKAMEI		C1403	9
C0102	9	ASPESGLEV		C0302	9	FAFVTDNTY		C0303	9	AANKVVLQL		C0304	9	AAMYKSLEL		C0701	9	CVYVHETVL		C0702	9	AYAGTGIQY		C0704	9	ALMYHTITL		C0801	9	AAGPVGMAA		C0802	9	AAEEPVSEV		C1202	9	AAKAVANTM		C1203	9	AAIEFISKM		C1402	9	AYMAAFNSI		C1403	9
C0102	9	ASPESISSL		C0302	9	FAGSFLEYY		C0303	9	AANPHSFVF		C0304	9	AANKTIIYL		C0701	9	EMKPHPWFF		C0702	9	AYFPYFITY		C0704	9	ALPFFVITM		C0801	9	AAGPVGPAL		C0802	9	AAEFGGESF		C1202	9	AAKCALAYF		C1203	9	AAIEHTIQW		C1402	9	AYMELVNNM		C1403	9
C0102	9	ASPKVRLSL		C0302	9	FAHDSTRVI		C0303	9	AANPIQFTL		C0304	9	AANKVVLQL		C0701	9	ERNPAVYNF		C0702	9	AYHELAQVY		C0704	9	ALPSHVVTM		C0801	9	AAHALREHL		C0802	9	AAEFLTSKL		C1202	9	AAKDHTVVL		C1203	9	AAIEWIIEH		C1402	9	AYMKSLLSL		C1403	9
C0102	9	ASPLRESAL		C0302	9	FAHEVGHNF		C0303	9	AAQIPTAAL		C0304	9	AANPFFKLL		C0701	9	ERVSYALLF		C0702	9	AYHGLTVPL		C0704	9	ALTPVVVTL		C0801	9	AAHDALVEL		C0802	9	AAEFVPSFL		C1202	9	AAKDKLSEL		C1203	9	AAIGLVIYY		C1402	9	AYMPHTFFI		C1403	9
C0102	9	ASPLRLQSH		C0302	9	FAHLINVEF		C0303	9	AASGHFICV		C0304	9	AANPHSFVF		C0701	9	FAPENTCHL		C0702	9	AYHTQTTPL		C0704	9	ARANQAIQM		C0801	9	AAHLLGSTL		C0802	9	AAEKSITIL		C1202	9	AAKDKLTEL		C1203	9	AAIKAIKFY		C1402	9	AYNFPVTAM		C1403	9
C0102	9	ASPPARDAL		C0302	9	FAHLPKSTF		C0303	9	AASPAGLDL		C0304	9	AANPIQFTL		C0701	9	FGRPVIVAY		C0702	9	AYIPTPIYF		C0704	9	ARHELQVEM		C0801	9	AAHLLNDAL		C0802	9	AAELPGSSA		C1202	9	AAKDPSPSV		C1203	9	AAIKIIRQL		C1402	9	AYNYYTKAI		C1403	9
C0102	9	ASPPPVSEL		C0302	9	FAHLRLEVL		C0303	9	AASPQAPTL		C0304	9	AANRLTLEL		C0701	9	FRGPVVPAF		C0702	9	AYKDAIYVF		C0704	9	ARLKDIIVM		C0801	9	AAHVIAEDV		C0802	9	AAENIGSEL		C1202	9	AAKDYNQKL		C1203	9	AAILEHSLF		C1402	9	AYPEIVAVY		C1403	9
C0102	9	ASPSAASQL		C0302	9	FAHPYQYEL		C0303	9	AATAATLAL		C0304	9	AAQDRVLSL		C0701	9	FRGVLHQVM		C0702	9	AYKDFLWFF		C0704	9	ARNDYLLTL		C0801	9	AAHWQFETA		C0802	9	AAEPTPTQV		C1202	9	AAKFKTPEL		C1203	9	AAINFQPKM		C1402	9	AYPEYLITF		C1403	9
C0102	9	ASPSRLLSL		C0302	9	FAIDPHLLL		C0303	9	AATDIFSYL		C0304	9	AAQIPTAAL		C0701	9	FRMPVLREY		C0702	9	AYKEPCFVY		C0704	9	ARPKSAFKV		C0801	9	AAIDHQIEV		C0802	9	AAERPGEAA		C1202	9	AAKPPPLSA		C1203	9	AAISEVLYV		C1402	9	AYPEYLITY		C1403	9
C0102	9	ASPSSIRSL		C0302	9	FAIDSSHPW		C0303	9	AATLLHLEL		C0304	9	AASFHSLSL		C0701	9	FRPLYTHEY		C0702	9	AYKEPPLAL		C0704	9	ARPPFVICV		C0801	9	AAIEDLNAV		C0802	9	AAESMPLLL		C1202	9	AAKSFSHSF		C1203	9	AAIYHVLHF		C1402	9	AYPYNFSNL		C1403	9
C0102	9	ASPTACRAV		C0302	9	FAIGILCSL		C0303	9	AATTVLQEL		C0304	9	AASMRALVL		C0701	9	FRVDYILSV		C0702	9	AYKNVKFVL		C0704	9	ASADTAYVL		C0801	9	AAIEGNLQL		C0802	9	AAETPALEL		C1202	9	AAKSKIAHL		C1203	9	AAKDLISKL		C1402	9	AYPYYASAF		C1403	9
C0102	9	ASPVRLLSL		C0302	9	FAIKSLRKL		C0303	9	AAVALAHAL		C0304	9	AASPAGLDL		C0701	9	FRVPTANVS		C0702	9	AYKPPGFSL		C0704	9	ASATVHIRM		C0801	9	AAIEIFEKV		C0802	9	AAETQSPSL		C1202	9	AAKSPSAQL		C1203	9	AAKEQWKEL		C1402	9	AYQDRLAYL		C1403	9
C0102	9	ASPVSFQEL		C0302	9	FAILRQAEL		C0303	9	AAVAPGHPL		C0304	9	AASPQAPTL		C0701	9	FRYHGLSSL		C0702	9	AYLEAHETF		C0704	9	ASHDSTLSL		C0801	9	AAIESGHKL		C0802	9	AAEVAATEI		C1202	9	AAMDYHWVF		C1203	9	AAKEYPFIL		C1402	9	AYQEAVRTL		C1403	9
C0102	9	ATPVVVRSL		C0302	9	FAINNSKSF		C0303	9	AAVDAGMAM		C0304	9	AATAATLAL		C0701	9	FRYTAGTPY		C0702	9	AYLESFYKF		C0704	9	ASSFVFLNL		C0801	9	AAIEVHEVL		C0802	9	AAEYGLVVL		C1202	9	AAMLDTVVF		C1203	9	AAKNFITKM		C1402	9	AYQFFREAL		C1403	9
C0102	9	AVAAYRRAL		C0302	9	FAIPGSSFL		C0303	9	AAVDAILSL		C0304	9	AATDIFSYL		C0701	9	FSNPYSIEY		C0702	9	AYLPVNESF		C0704	9	ASSPHGLVM		C0801	9	AAIGTDKEL		C0802	9	AAGEPGTSM		C1202	9	AAMLKIAEM		C1203	9	AAKPFFCEL		C1402	9	AYQLMTDVF		C1403	9
C0102	9	AVFGEATNL		C0302	9	FAIPLIEKL		C0303	9	AAVDTNLTL		C0304	9	AATLLHLEL		C0701	9	FTNRTVLEL		C0702	9	AYPDKNFTL		C0704	9	ASTCVIIKL		C0801	9	AAIHPSLEI		C0802	9	AAVDAGMAM		C1202	9	AAMPRPVSY		C1203	9	AALMRPLVV		C1402	9	AYQQRVTAL		C1403	9
C0102	9	AVIGSTEEL		C0302	9	FAIPMIHAV		C0303	9	AAVGEPAFL		C0304	9	AATSRIAEL		C0701	9	GAPVAAAAL		C0702	9	AYPEIVAVY		C0704	9	ASVPAALAS		C0801	9	AAIKAFIAV		C0802	9	AGDDAPRAV		C1202	9	AAMPVAQHL		C1203	9	AALPKATIL		C1402	9	AYQVSVCAF		C1403	9
C0102	9	AVISGVMSL		C0302	9	FAIPVGSGL		C0303	9	AAVGFLSSL		C0304	9	AATTVLQEL		C0701	9	GGPGGVGGL		C0702	9	AYPEVRIVL		C0704	9	ATAPQAPVM		C0801	9	AAIKPGTPL		C0802	9	AGDDCQAGL		C1202	9	AANPHSFVF		C1203	9	AALTFPVLF		C1402	9	AYQYTIRAH		C1403	9
C0102	9	AVPEHAARL		C0302	9	FAIQRTTNF		C0303	9	AAVHIILVI		C0304	9	AAVALAHAL		C0701	9	GNLRFVYEL		C0702	9	AYPEYLITF		C0704	9	ATGNYIIIM		C0801	9	AAILGMHTL		C0802	9	AGDDPSVPL		C1202	9	AAPAYSRAL		C1203	9	AALTIIRYY		C1402	9	AYSIVAGVF		C1403	9
C0102	9	AVPFSLDSV		C0302	9	FAIRRLPAF		C0303	9	AAVNHISQL		C0304	9	AAVDTNLTL		C0701	9	GNYFHHVVL		C0702	9	AYPEYLITY		C0704	9	ATMGHWILL		C0801	9	AAILPDMAL		C0802	9	AGDDRVLVM		C1202	9	AAPDGTRNL		C1203	9	AAMDSAWMV		C1402	9	AYTPFHAVL		C1403	9
C0102	9	AVPIYSSAL		C0302	9	FAIRSLAEL		C0303	9	AAVNVICEL		C0304	9	AAVGEPAFL		C0701	9	GNYYKPWFF		C0702	9	AYPPPAPAY		C0704	9	ATPDHVLFM		C0801	9	AAINHYIEA		C0802	9	AGDEGRVLL		C1202	9	AAPEGAGAL		C1203	9	AAMELAQMV		C1402	9	AYVHMVTHF		C1403	9
C0102	9	AVPLCKQAL		C0302	9	FAISIKYNV		C0303	9	AAVPDSVAL		C0304	9	AAVGSVATL		C0701	9	GRAPQVLVL		C0702	9	AYPTYPVGF		C0704	9	ATSNVAISV		C0801	9	AAINPNHPL		C0802	9	AGDFSKTSL		C1202	9	AAPTAQKSL		C1203	9	AAMLDTVVF		C1402	9	AYVPGFAHI		C1403	9
C0102	9	CAPRRKVAL		C0302	9	FAISILQQI		C0303	9	AAVPKSLQL		C0304	9	AAVHIILVI		C0701	9	GRFEDVYQL		C0702	9	AYQEAVRTL		C0704	9	AVGAVPVVL		C0801	9	AAISQVDRL		C0802	9	AGDGGRVAL		C1202	9	AAPTSAAAL		C1203	9	AAMPRIYEL		C1402	9	AYYERALQL		C1403	9
C0102	9	CGPASQSTL		C0302	9	FAIWHIIAF		C0303	9	AAVPKTFQL		C0304	9	AAVKVIQSL		C0701	9	GRHSLPKTL		C0702	9	AYQELLQHY		C0704	9	AVIEAEHTL		C0801	9	AAIVEMQEL		C0802	9	AGDHVSLTL		C1202	9	AAPVATGAV		C1203	9	AAMPRPVSY		C1402	9	AYYKKALEL		C1403	9
C0102	9	CGPGGVDHL		C0302	9	FAIYKMSFF		C0303	9	AAVPPGSLL		C0304	9	AAVNHISQL		C0701	9	GRMVQVHEL		C0702	9	AYRDARVEL		C0704	9	AVIESVTFL		C0801	9	AALDDGSAL		C0802	9	AGDLPGLAA		C1202	9	AAPVPTTTL		C1203	9	AAMPVAQHL		C1402	9	AYYPSSFPK		C1403	9
C0102	9	CGPHTLHSL		C0302	9	FAKPENIDL		C0303	9	AAVPRAAFL		C0304	9	AAVNSALAF		C0701	9	GRNPFVHEL		C0702	9	AYRKLALKY		C0704	9	AVMEEKTIL		C0801	9	AALDERSTI		C0802	9	AGDMGELAL		C1202	9	AAQMPTVHY		C1203	9	AAMSHLLEM		C1402	9	AYYVSNEEL		C1403	9
C0102	9	CSPGRLAVL		C0302	9	FALDSGLEI		C0303	9	AAVPVGYGL		C0304	9	AAVNVICEL		C0701	9	GRNSTPLHL		C0702	9	AYRLSVEIY		C0704	9	AVMLHSFTL		C0801	9	AALDEYEEL		C0802	9	AGDNKNSVL		C1202	9	AAQSFYQTY		C1203	9	AAMWALQTV		C1402	9	AYYYRKFFY		C1403	9
C0102	9	CSPKQGVSL		C0302	9	FALGAGTAL		C0303	9	AAVTGVLSL		C0304	9	AAVPDSVAL		C0701	9	GRSCIILEF		C0702	9	AYRQGHFTY		C0704	9	AVNPHLFSL		C0801	9	AALDIYETL		C0802	9	AGDSGFVSL		C1202	9	AAQTVGNTY		C1203	9	AANPHSFVF		C1402	9	AYYYSLQIY		C1403	9
C0102	9	CTPQAAKAI		C0302	9	FALGPTISF		C0303	9	AAVVSSPSL		C0304	9	AAVPKSLQL		C0701	9	GRYHVIRKL		C0702	9	AYSDVAKRL		C0704	9	AVQEKVFEL		C0801	9	AALDKATVL		C0802	9	AGDSHTAAL		C1202	9	AARAALRVY		C1203	9	AAPALPFYY		C1402	9	CFFPNGNAF		C1403	9
C0102	9	CVIGVARSL		C0302	9	FALGSPIAM		C0303	9	AAYAGGLVL		C0304	9	AAVPKTFQL		C0701	9	GSNPVRVSF		C0702	9	AYSEAIFEL		C0704	9	AVSNHVFHL		C0801	9	AALDVYNAV		C0802	9	AGDSPGSQF		C1202	9	AARDFLQTF		C1203	9	AAQAIFPSM		C1402	9	CFFTAKTTF		C1403	9
C0102	9	DAPVSELSL		C0302	9	FALGVYRTL		C0303	9	AAYDRYLKL		C0304	9	AAVPPGSLL		C0701	9	GTSPYVYQL		C0702	9	AYSSYVHQY		C0704	9	AVSNHVFQL		C0801	9	AALEDKNSL		C0802	9	AGDTTNFHF		C1202	9	AARLVLENY		C1203	9	AAQEAVKLY		C1402	9	CFNPMKSVL		C1403	9
C0102	9	EAPESAQCL		C0302	9	FALHKTLEF		C0303	9	AAYLRALSL		C0304	9	AAVPRAAFL		C0701	9	GYPGGIHEV		C0702	9	AYTPFHAVL		C0704	9	AVSPVDLNL		C0801	9	AALFKAWAL		C0802	9	AIDDVDIDL		C1202	9	AARNVPVGF		C1203	9	AAQETVRLL		C1402	9	CFYGFQIAM		C1403	9
C0102	9	EAPFSNLEL		C0302	9	FALHSASVF		C0303	9	AAYYHPSYL		C0304	9	AAVRHVLAL		C0701	9	HLPSGVKSL		C0702	9	CRFQIVQVL		C0704	9	AVSPYSIVL		C0801	9	AALGPIREL		C0802	9	AIDEALAAL		C1202	9	AARPATSTL		C1203	9	AAQFIPKFF		C1402	9	CYNLETNSL		C1403	9
C0102	9	EAPPAFSHL		C0302	9	FALLPRLEY		C0303	9	AGIAHPSAL		C0304	9	AAVRIGSVL		C0701	9	HNKEPVYSL		C0702	9	CRHANIVAY		C0704	9	AVTEHCITL		C0801	9	AALKPLETL		C0802	9	AIDEDLTAL		C1202	9	AARSGPLAM		C1203	9	AAQSLVQLL		C1402	9	CYQEFAAQL		C1403	9
C0102	9	EGPPVTTVL		C0302	9	FALNLFKHL		C0303	9	AGVPLFLLE		C0304	9	AAVSRIVAL		C0701	9	HNSGVPVYL		C0702	9	CRQPQPFLL		C0704	9	AVVAHAYYL		C0801	9	AALPVYQEL		C0802	9	AIDENKNAL		C1202	9	AARVIIEKY		C1203	9	AAQVRIKIL		C1402	9	CYQEGLRSL		C1403	9
C0102	9	EMPDSAAAL		C0302	9	FALPFGRTA		C0303	9	AIFIKPKSI		C0304	9	AAYAGGLVL		C0701	9	HNSNIIKKL		C0702	9	CYGGTAAVF		C0704	9	AYSEAIFEL		C0801	9	AALQCMHAL		C0802	9	AIDFGEQAL		C1202	9	AARVPGVEH		C1203	9	AARFGISSV		C1402	9	EWPPFVVTL		C1403	9
C0102	9	ESPAPKQEL		C0302	9	FALPILNAL		C0303	9	AIGSRLAVI		C0304	9	AAYDRYLKL		C0701	9	HNVGYHIVY		C0702	9	CYILRPWAY		C0704	9	CAPRRKVAL		C0801	9	AALQDRSIL		C0802	9	AIDIHNKTL		C1202	9	AARYPQITF		C1203	9	AARLRAVDF		C1402	9	FALNTKTSY		C1403	9
C0102	9	EVPGPAAAL		C0302	9	FALPVGLIV		C0303	9	AIIPYFITL		C0304	9	AAYHLIIEL		C0701	9	HNVSFAFEL		C0702	9	CYNPLLDSF		C0704	9	CGANHTLVL		C0801	9	AALQGDPAL		C0802	9	AIDIPHIWL		C1202	9	AASPIITLV		C1203	9	AARPVPWNA		C1402	9	FFDEKLNSL		C1403	9
C0102	9	FAPASAAAA		C0302	9	FALPYIRDV		C0303	9	AILMVLVAL		C0304	9	AAYLRALSL		C0701	9	HRGLFIQQL		C0702	9	CYSPKPSVY		C0704	9	CSSPHALVL		C0801	9	AALVDLDSL		C0802	9	AIDIQNAYL		C1202	9	AASPVVAEY		C1203	9	AASDFIFLV		C1402	9	FFEFLTKEL		C1403	9
C0102	9	FAPAVGPAL		C0302	9	FALPYVIVL		C0303	9	AIMDLLLRL		C0304	9	AAYQSVRIL		C0701	9	HRLPPVTSF		C0702	9	ERNPAVYNF		C0704	9	EDLIHEIAF		C0801	9	AAMDAEIVL		C0802	9	AIDQRNQQL		C1202	9	AASPVVSSM		C1203	9	AASGHFICV		C1402	9	FFFAPASSY		C1403	9
C0102	9	FAPEKLQEL		C0302	9	FALSQPRAM		C0303	9	AININELFI		C0304	9	AAYYHPSYL		C0701	9	HRNEVTVEL		C0702	9	ERPPNPIEF		C0704	9	EDQLRGAGF		C0801	9	AAMEDLTRL		C0802	9	AIDRAGAEV		C1202	9	AASSIYSMY		C1203	9	AASGLPLMV		C1402	9	FFFDKTEEL		C1403	9
C0102	9	FAPENTCHL		C0302	9	FALSVTNPL		C0303	9	AIVKPGVPM		C0304	9	AFGEGLAQR		C0701	9	HRNGGLITL		C0702	9	ERVPFILTY		C0704	9	EELPHIHAF		C0801	9	AAMEFLQEL		C0802	9	AIDSPVSFL		C1202	9	AASTAIYVY		C1203	9	AASMRALVL		C1402	9	FFFTARTSF		C1403	9
C0102	9	FAPGDLPEL		C0302	9	FALVFPLMY		C0303	9	ALAGPAAAL		C0304	9	AGSAVFWVL		C0701	9	HRPEFSSCL		C0702	9	EYPDLIHIY		C0704	9	FAFPGEILM		C0801	9	AAMKALQAL		C0802	9	AKDEPDTNL		C1202	9	AATCNHTVM		C1203	9	AASPIITLV		C1402	9	FFGTHETAF		C1403	9
C0102	9	FAPIQPLAM		C0302	9	FAMDVYKNL		C0303	9	ALDVFALWL		C0304	9	AGVPLFLLE		C0701	9	HRWEVCLTM		C0702	9	FFKELIQEF		C0704	9	FAHPYQYEL		C0801	9	AAMKLMTAL		C0802	9	ALDDMISTL		C1202	9	AATDITSSL		C1203	9	AASSIQRVL		C1402	9	FFHEYLVSV		C1403	9
C0102	9	FAPQHMAML		C0302	9	FAMEFVKYY		C0303	9	ALVLLRPVI		C0304	9	AIAAVFHTL		C0701	9	HRYEVVTEL		C0702	9	FFMPGFAPL		C0704	9	FAIHKKIVL		C0801	9	AAMYKSLEL		C0802	9	ALDEAAAAL		C1202	9	AATGATPIA		C1203	9	AATEIVERV		C1402	9	FFHLVNSEM		C1403	9
C0102	9	FAPYERRAM		C0302	9	FAMPPPHGM		C0303	9	AQYDASELK		C0304	9	AIIESGKTL		C0701	9	HRYPAVHVY		C0702	9	FKAPITSEF		C0704	9	FAIPGSIFL		C0801	9	AANCINIPL		C0802	9	ALDEPTTNL		C1202	9	AATGHTVVL		C1203	9	AATEVVNIL		C1402	9	FFHWVNNVL		C1403	9
C0102	9	FFDEKLNSL		C0302	9	FAMPSSTPL		C0303	9	ASIPYFHAM		C0304	9	AIIPYFITL		C0701	9	HSGPIHVLL		C0702	9	FKGQNPFEL		C0704	9	FALSGPLFL		C0801	9	AANLLNDAL		C0802	9	ALDGDQMEL		C1202	9	AAVAAAAYY		C1203	9	AATPAVRTV		C1402	9	FFHYAVDNL		C1403	9
C0102	9	FFPEYTHQL		C0302	9	FAMPYFIQV		C0303	9	ASLHVMMTL		C0304	9	AIMDLLLRL		C0701	9	HSNPYFFLL		C0702	9	FKIHQPYTL		C0704	9	FAMPYFIQV		C0801	9	AAPAYSRAL		C0802	9	ALDGGPRAL		C1202	9	AAVAPGHPL		C1203	9	AATQLVNQL		C1402	9	FFIACVTSF		C1403	9
C0102	9	FGPEWLRAL		C0302	9	FAMTLTGPL		C0303	9	ASLPSGLPI		C0304	9	AIVGQAQEI		C0701	9	HSPPFSKTL		C0702	9	FKNPEPELL		C0704	9	FAPYHLVLL		C0801	9	AAPDGTRNL		C0802	9	ALDKATVLL		C1202	9	AAVDAGMAM		C1203	9	AATTVLQEL		C1402	9	FFIAGRYEF		C1403	9
C0102	9	FGPGPGSNF		C0302	9	FANDATFEI		C0303	9	ASLPVQEYL		C0304	9	AIVKVFLAL		C0701	9	HSTVHLIEF		C0702	9	FKNPIIEKY		C0704	9	FAQEALTVL		C0801	9	AAPVPTTTL		C0802	9	ALDKSSSTL		C1202	9	AAVDRTTEL		C1203	9	AAVAAVLYV		C1402	9	FFIDCMAAL		C1403	9
C0102	9	FGPIADIAM		C0302	9	FANEPFADF		C0303	9	ASSPEHPEL		C0304	9	ALSHILTAL		C0701	9	HSYFHKWSA		C0702	9	FKPETYWVL		C0704	9	FASEYPLIL		C0801	9	AAQWQKEEM		C0802	9	ALDLAPSSL		C1202	9	AAVEDLHHY		C1203	9	AAVAIACVV		C1402	9	FFIDQANYF		C1403	9
C0102	9	FIAPTGHSL		C0302	9	FANLPNQVY		C0303	9	ASVDKVLEL		C0304	9	ALVLLRPVI		C0701	9	HTHDYPYSL		C0702	9	FKSNVTKTM		C0704	9	FASHVSPEV		C0801	9	AASAQLLRL		C0802	9	ALDLESLSL		C1202	9	AAVELWQHF		C1203	9	AAVALLLQV		C1402	9	FFINEAMEL		C1403	9
C0102	9	FIFSDTHEL		C0302	9	FANNVQLSL		C0303	9	ASVGKTSIL		C0304	9	AQAEVYKEL		C0701	9	IAPGVTHEL		C0702	9	FKSPVKTIR		C0704	9	FASVVDIKL		C0801	9	AASGHFICV		C0802	9	ALDPPGPTL		C1202	9	AAVGHVLVV		C1203	9	AAVDLIIKS		C1402	9	FFKERVMEI		C1403	9
C0102	9	FIISRTQAL		C0302	9	FAQDVGRMF		C0303	9	ATAQPPAPL		C0304	9	AQVPFEQIL		C0701	9	IINSNPIEL		C0702	9	FRDAFTQEL		C0704	9	FATTSPLVL		C0801	9	AASGLPLMV		C0802	9	ALDSEGRAL		C1202	9	AAVGTGSSY		C1203	9	AAVDNPIFY		C1402	9	FFKLPGGEL		C1403	9
C0102	9	FIIYDTHSL		C0302	9	FAQEAISVL		C0303	9	ATGPEGVLP		C0304	9	ASAAAALVL		C0701	9	IQPNIQLIL		C0702	9	FRFENVNGY		C0704	9	FGAGHLICL		C0801	9	AASKVMVEL		C0802	9	ALDSGVSTM		C1202	9	AAVIIQTHF		C1203	9	AAVGHVLVV		C1402	9	FFLARPTTF		C1403	9
C0102	9	FIMDRAQAL		C0302	9	FAQEALTVL		C0303	9	ATIPPISSL		C0304	9	ASAPDPPVL		C0701	9	IRDDHIRFI		C0702	9	FRFQPFESY		C0704	9	FGSEFSPEL		C0801	9	AASSSVCKL		C0802	9	ALDTGWNEL		C1202	9	AAVNHISQL		C1203	9	AAVHIILVI		C1402	9	FFLIVKTLY		C1403	9
C0102	9	FINGDISSL		C0302	9	FAQPGSFEY		C0303	9	ATTHLSPEL		C0304	9	ASFIITKAI		C0701	9	IRFQEERRL		C0702	9	FRGDLCYLL		C0704	9	FIGSHVIEL		C0801	9	AASVINQAL		C0802	9	ALDVPHAEL		C1202	9	AAVPEVAVY		C1203	9	AAVLRIPIL		C1402	9	FFLQKRLQL		C1403	9
C0102	9	FIPFSVSSV		C0302	9	FAQPSGLSL		C0303	9	ATVHPGLEL		C0304	9	ASGPPVSEL		C0701	9	IRGPTQHEL		C0702	9	FRGNTPLHL		C0704	9	FKPETYWVL		C0801	9	AASYISQSL		C0802	9	ALDVPNTAF		C1202	9	AAVSFISKF		C1203	9	AAVNVICEL		C1402	9	FFLRMKCTL		C1403	9
C0102	9	FIPKNYIEM		C0302	9	FARPASPSL		C0303	9	AVADAVVTA		C0304	9	ASIPYFHAM		C0701	9	IRHETIRVA		C0702	9	FRGPTVSNI		C0704	9	FLPDHPIVL		C0801	9	AATAVTQAL		C0802	9	ALDVPNTML		C1202	9	AAYGYKITE		C1203	9	AAVPAVIQF		C1402	9	FFLSHQTAL		C1403	9
C0102	9	FIPWGPASI		C0302	9	FARVPVATY		C0303	9	AVAPVASAL		C0304	9	ASITPGTIL		C0701	9	IRHPNIITL		C0702	9	FRGPVVPAF		C0704	9	FLPDLQITM		C0801	9	AATDIFSYL		C0802	9	ALDVQEHSL		C1202	9	AAYLPKNTH		C1203	9	AAVPLVRLF		C1402	9	FFLSKIRSH		C1403	9
C0102	9	FIQEIEHAL		C0302	9	FASDVQFVL		C0303	9	AVFGHPFSL		C0304	9	ASIYTGITL		C0701	9	IRKPYIWEY		C0702	9	FRHEVGYVL		C0704	9	FLPQKIIYL		C0801	9	AATDITSSL		C0802	9	ALEDMFDAL		C1202	9	AAYPNSSLF		C1203	9	AAVPLYRLY		C1402	9	FFLVQTKEV		C1403	9
C0102	9	FISGHTSEL		C0302	9	FASEVSNVL		C0303	9	AVHPSGVAL		C0304	9	ASLHVMMTL		C0701	9	IRMTYIKEL		C0702	9	FRHEVMYSF		C0704	9	FLPYHVLLL		C0801	9	AATEEAQAL		C0802	9	AMDLIISTL		C1202	9	AAYYHPSYL		C1203	9	AAVQLIWVV		C1402	9	FFMEKRAKY		C1403	9
C0102	9	FISPTGHSL		C0302	9	FASEYPLIL		C0303	9	AVNPKFVAL		C0304	9	ASLPSGLPI		C0701	9	IRNDYYLNL		C0702	9	FRHLIEFTY		C0704	9	FLSHIPITL		C0801	9	AATKILTEL		C0802	9	AMDLPDVTL		C1202	9	AFAAAAAAA		C1203	9	AAVSFISKF		C1402	9	FFMERSWSV		C1403	9
C0102	9	FLPDHPIVL		C0302	9	FASFPHMVL		C0303	9	AVVDVRIGM		C0304	9	ASSPEHPEL		C0701	9	IRNHHVASL		C0702	9	FRHNPYTAF		C0704	9	FLVEHVLTL		C0801	9	AATKVTTVL		C0802	9	AMDLVKNHL		C1202	9	AGMPITEVF		C1203	9	AAVSFPYVI		C1402	9	FFMLRSLSL		C1403	9
C0102	9	FLPEAPAEL		C0302	9	FASGAFLHI		C0303	9	AVVLPHQPL		C0304	9	ASSPGILVL		C0701	9	IRNQIIREL		C0702	9	FRHPHIIKL		C0704	9	FNDPNAKEM		C0801	9	AATLLHLEL		C0802	9	ANDDPNGIF		C1202	9	AIAAAAAAA		C1203	9	AAVVFPMMV		C1402	9	FFMPGFAPL		C1403	9
C0102	9	FLPFCHSEL		C0302	9	FASHVSPEV		C0303	9	AVVPLVGKL		C0304	9	ASSPPVLSL		C0701	9	IRPEHVLRL		C0702	9	FRKSMVEHY		C0704	9	FNHPEIVQL		C0801	9	AATSATHEL		C0802	9	ANDEATVSV		C1202	9	AIDVILEGY		C1203	9	AAYAGGLVL		C1402	9	FFNDTTTAF		C1403	9
C0102	9	FLPGFSQSL		C0302	9	FASIPGLEF		C0303	9	CAEAVSRVL		C0304	9	ASSPYFAAL		C0701	9	IRPENVIIY		C0702	9	FRKSTVEHF		C0704	9	FQMPTPIQM		C0801	9	AATTVLQEL		C0802	9	ANDVSFATI		C1202	9	AIFRPGTSF		C1203	9	AAYFYGPIF		C1402	9	FFNGLRTEL		C1403	9
C0102	9	FLPGISTAL		C0302	9	FASTILHLV		C0303	9	CAIAQAESL		C0304	9	ASTARHLYL		C0701	9	IRPGTAFEL		C0702	9	FRKVDVDEY		C0704	9	FQNPSTVTL		C0801	9	AAVAPGHPL		C0802	9	AQDDPDSCL		C1202	9	AIIADSSTF		C1203	9	AAYGLVVVT		C1402	9	FFNSVRSVF		C1403	9
C0102	9	FLPLHYDYL		C0302	9	FASYATIIL		C0303	9	CAYDRIVVA		C0304	9	ASVDKVLEL		C0701	9	IRPQVVTTF		C0702	9	FRLDTPLYF		C0704	9	FRCPSNHQM		C0801	9	AAVAPVLSI		C0802	9	AQDEHLITF		C1202	9	AIIDILTHY		C1203	9	AAYGWPLYI		C1402	9	FFPALHESL		C1403	9
C0102	9	FLPNAPKAL		C0302	9	FATDAILAT		C0303	9	CQDIGAKSL		C0304	9	ASVGKTSIL		C0701	9	IRSSHIKYI		C0702	9	FRLEQGYEL		C0704	9	FRHPHIIKL		C0801	9	AAVDAGMAM		C0802	9	AQDELGRTL		C1202	9	AIIDTVINY		C1203	9	AAYGYGIRY		C1402	9	FFPEYTHQL		C1403	9
C0102	9	FLPSHYNYL		C0302	9	FATDSGLEF		C0303	9	EALTEAELL		C0304	9	ASYLRLWAL		C0701	9	IRSSYIRVL		C0702	9	FRLLQETLY		C0704	9	FRLPTAEVM		C0801	9	AAVDPDSGL		C0802	9	AQDEPAESL		C1202	9	AIIENLKYF		C1203	9	AAYHLIIEL		C1402	9	FFPFDTRQM		C1403	9
C0102	9	FLPSPLHAL		C0302	9	FATFPSSAF		C0303	9	ETARVPAPV		C0304	9	ATIPPISSL		C0701	9	IRVDKITEY		C0702	9	FRLLQETMY		C0704	9	FRMDHEFVA		C0801	9	AAVDQSECL		C0802	9	AQDLGVVNL		C1202	9	AIIERTASF		C1203	9	AAYHVEVTF		C1402	9	FFPFNPLDF		C1403	9
C0102	9	FLQGDTSVL		C0302	9	FATGVWHQM		C0303	9	EVGVAIQEK		C0304	9	ATTHLSPEL		C0701	9	IRYPDSHQL		C0702	9	FRLPTAEVM		C0704	9	FRNPLAPAV		C0801	9	AAVDRTTEL		C0802	9	AQDLIRTIL		C1202	9	AIIHGLSSL		C1203	9	AAYKEAFEI		C1402	9	FFPGFPLAL		C1403	9
C0102	9	FMNSVIQSL		C0302	9	FATMVRPVA		C0303	9	FAAAKLLAL		C0304	9	ATVHPGLEL		C0701	9	ITNKYQLVF		C0702	9	FRMPVLREY		C0704	9	FRPPNPWTM		C0801	9	AAVDTNLTL		C0802	9	AQDLITRLL		C1202	9	AIINNCQTF		C1203	9	AAYKWLVCY		C1402	9	FFPIAGLEF		C1403	9
C0102	9	FMPKSYEAL		C0302	9	FATPVFITK		C0303	9	FAAASREVL		C0304	9	AVAPVASAL		C0701	9	ITQIEHEVS		C0702	9	FRNERAIRF		C0704	9	FRQDFHSEM		C0801	9	AAVEPDVVV		C0802	9	AQDLQKERL		C1202	9	AIITPQTCY		C1203	9	AAYLRALSL		C1402	9	FFPKKLLEL		C1403	9
C0102	9	FMPPGLQEL		C0302	9	FATTSPLVL		C0303	9	FAADIISVL		C0304	9	AVCVAPSIL		C0701	9	IVPGNVKSL		C0702	9	FRNFFSNMF		C0704	9	FRQIIAVVL		C0801	9	AAVKATQTL		C0802	9	AQDLSREQL		C1202	9	AIKLVTAVF		C1203	9	AAYPEIVAV		C1402	9	FFPLHPMMI		C1403	9
C0102	9	FSPAPRPEM		C0302	9	FAVAIYAVY		C0303	9	FAADLAEEL		C0304	9	AVFGHPFSL		C0701	9	KAAPCIYWL		C0702	9	FRNIPGITL		C0704	9	FRTDGHPVM		C0801	9	AAVNVICEL		C0802	9	AQDPEIASL		C1202	9	AIPAFISLL		C1203	9	AAYPQVRCY		C1402	9	FFPMHFQAF		C1403	9
C0102	9	FSPAPSLSL		C0302	9	FAVAMHLVY		C0303	9	FAADVLMAI		C0304	9	AVLPFSPAL		C0701	9	KAFARPWSL		C0702	9	FRNLHTIVL		C0704	9	FRVDYILSV		C0801	9	AAVPPAEEL		C0802	9	AQDPENQAL		C1202	9	AIRDGVIEA		C1203	9	AAYQSVRIL		C1402	9	FFPPFVSCI		C1403	9
C0102	9	FSPDSRHVL		C0302	9	FAVARLEIL		C0303	9	FAADVRLMF		C0304	9	AVMNYLPTL		C0701	9	KAFPFHIIF		C0702	9	FRNPKTSFY		C0704	9	FRVPTANVS		C0801	9	AAVRDISEA		C0802	9	AQDQLHNAL		C1202	9	AIYGGSASY		C1203	9	AAYYHPSYL		C1402	9	FFPSNVEQF		C1403	9
C0102	9	FSPFHASVL		C0302	9	FAVDSLRQL		C0303	9	FAAESFTFL		C0304	9	AVNPKFVAL		C0701	9	KALEVFPEF		C0702	9	FRPALPVSY		C0704	9	FSHAQTVVL		C0801	9	AAWLQVLPV		C0802	9	AQDWPATSL		C1202	9	ALAGPAAAL		C1203	9	AAYYLPRHL		C1402	9	FFPVHFQEF		C1403	9
C0102	9	FSPFNPTSL		C0302	9	FAVGSFHTL		C0303	9	FAAGLGRSL		C0304	9	AVVGDPIAL		C0701	9	KANHAELIL		C0702	9	FRPDEPYYY		C0704	9	FSSDVTHEM		C0801	9	AAYGHRLCL		C0802	9	AQDYLQCVL		C1202	9	ALPEFTSIF		C1203	9	AAYYPPSQI		C1402	9	FFPWNSHVV		C1403	9
C0102	9	FSPISDIGL		C0302	9	FAVGVQQVL		C0303	9	FAAISGMIL		C0304	9	AVVLPHQPL		C0701	9	KANPALYVL		C0702	9	FRPECFSAF		C0704	9	FSSPVCMAF		C0801	9	AAYYHPSYL		C0802	9	ASDCSPKEL		C1202	9	AMYPHIFYF		C1203	9	AGIAFAPVY		C1402	9	FFPYQVTER		C1403	9
C0102	9	FSPLPTPAL		C0302	9	FAVIAHVGM		C0303	9	FAALHGPAL		C0304	9	CADPQWHVL		C0701	9	KAPEMTNEL		C0702	9	FRPEHVSRL		C0704	9	FTLSHITQL		C0801	9	AGADPSDPL		C0802	9	ASDDGTVRI		C1202	9	AQGPTPRYF		C1203	9	AGIDHLVSY		C1402	9	FFQDKARFY		C1403	9
C0102	9	FSPLRIWDL		C0302	9	FAVISRHSL		C0303	9	FAANVYEAF		C0304	9	CAEAVSRVL		C0701	9	KAPEPLSSL		C0702	9	FRPEWQSVY		C0704	9	FTVPHTHVF		C0801	9	AGWEGTESL		C0802	9	ASDDHTICL		C1202	9	AQISWVTVF		C1203	9	AGIGWLITF		C1402	9	FFQETNIPY		C1403	9
C0102	9	FSPNRVIGL		C0302	9	FAVNMFRTL		C0303	9	FAAQRGLAV		C0304	9	CAIAQAESL		C0701	9	KGFVHKVEL		C0702	9	FRPEWTQRY		C0704	9	FVAETHIVL		C0801	9	AIAAVFHTL		C0802	9	ASDDHTVCL		C1202	9	AQKNHIPVF		C1203	9	AGVGWRVDY		C1402	9	FFQFGGQSL		C1403	9
C0102	9	FSPNVPKSL		C0302	9	FAVSDGLEL		C0303	9	FAATHSLEF		C0304	9	CAIPQVMAI		C0701	9	KGSGVVIIM		C0702	9	FRPLDVSLY		C0704	9	FVANAIIHL		C0801	9	AIIALFHLL		C0802	9	ASDEPDRAL		C1202	9	AQVPFEQIL		C1203	9	AGYEAPVLF		C1402	9	FFQQTTTSF		C1403	9
C0102	9	FSPSSLSSL		C0302	9	FAYAHTLAL		C0303	9	FAAVEGIFF		C0304	9	CGVDHMVTL		C0701	9	KIKEYIQKY		C0702	9	FRPLYTHEY		C0704	9	FVDPAQITM		C0801	9	ALFTCEMLV		C0802	9	ASDFGQVGL		C1202	9	ASAPPGPPA		C1203	9	AGYPNVNIH		C1402	9	FFSEREASF		C1403	9
C0102	9	FVIETARQL		C0302	9	FAYEGPMYL		C0303	9	FACEKNENL		C0304	9	CSLWPGQAL		C0701	9	KINEAFIEM		C0702	9	FRPPGTSDL		C0704	9	FVEPFVILL		C0801	9	APAPAAHVA		C0802	9	ASDFPHISA		C1202	9	ASKEPPLYY		C1203	9	AGYQHIRMY		C1402	9	FFTDNVPAL		C1403	9
C0102	9	FVIPVVQAL		C0302	9	FAYHYPYTY		C0303	9	FACLMFKHL		C0304	9	CSSPHALVL		C0701	9	KIPDKQYVL		C0702	9	FRPPITQEI		C0704	9	FVFPGELLL		C0801	9	APAPPKAEA		C0802	9	ASDGVVAAI		C1202	9	ASPSSIRSL		C1203	9	AGYSDPILV		C1402	9	FFTSKALNM		C1403	9
C0102	9	FVPETKEEL		C0302	9	FAYKDYLSF		C0303	9	FADAASLLL		C0304	9	CSTVPSLAL		C0701	9	KKNPFHLEL		C0702	9	FRPPNPWTM		C0704	9	FVGQNVLIL		C0801	9	APGYSYTAA		C0802	9	ASDHAPHTL		C1202	9	ASSPLITVF		C1203	9	AGYYLVVYY		C1402	9	FFVENVSEL		C1403	9
C0102	9	FVPETQVSL		C0302	9	FAYLGRLAH		C0303	9	FADALCIGI		C0304	9	CTYGKPVTF		C0701	9	KKPELVISY		C0702	9	FRPPTRAEL		C0704	9	FVHDLVLYL		C0801	9	APIQSEPRV		C0802	9	ASDIAMTEL		C1202	9	ASVPAALAS		C1203	9	AIIDTVINY		C1402	9	FFYPGWKVL		C1403	9
C0102	9	FVPGTTAVL		C0302	9	FAYMPNNSL		C0303	9	FADDGVKYL		C0304	9	EATDIALLL		C0701	9	KKPNFILLL		C0702	9	FRPQQTEIY		C0704	9	FVHPDPLWI		C0801	9	APKAGPGVV		C0802	9	ASDIPGLHL		C1202	9	ATAAAAAAY		C1203	9	AIYDVTVVY		C1402	9	FFYPLDFTF		C1403	9
C0102	9	FVPRHTRNL		C0302	9	FAYNFREEL		C0303	9	FADELSHLL		C0304	9	EAYTGGLEL		C0701	9	KKPTVTLTY		C0702	9	FRPQSGRVL		C0704	9	FVHPKPVSL		C0801	9	APMPPIIHA		C0802	9	ASDITSASM		C1202	9	AVAAVVPAM		C1203	9	ALFPSVRIL		C1402	9	FFYQRLVEF		C1403	9
C0102	9	FVPSDKSAL		C0302	9	FAYPAIRYL		C0303	9	FADFERHFL		C0304	9	FAAASREVL		C0701	9	KKTEVVITL		C0702	9	FRQDFHSEM		C0704	9	FVHQGETEL		C0801	9	APRLQSEVA		C0802	9	ASDKETYEL		C1202	9	AVAPPGCSH		C1203	9	ALLNFVVKY		C1402	9	FFYTHLINF		C1403	9
C0102	9	FVPVVYHDL		C0302	9	FAYPAPLEV		C0303	9	FADGFVKAL		C0304	9	FAADAMARL		C0701	9	KLNESVMVF		C0702	9	FRQEYLDTL		C0704	9	FVHTGVYNL		C0801	9	APRPPVSAA		C0802	9	ASDLESKQL		C1202	9	AVHDITVAY		C1203	9	ALYPNVVQV		C1402	9	FLYPFPLAL		C1403	9
C0102	9	FVTFTTRAM		C0302	9	FAYRGFKYL		C0303	9	FADGHVLEL		C0304	9	FAADIISVL		C0701	9	KLNPYAKTM		C0702	9	FRQIIAVVL		C0704	9	FVMETFVHL		C0801	9	APRQPGLMA		C0802	9	ASDLGSAAV		C1202	9	AVIAPKSSY		C1203	9	AMASIINRL		C1402	9	FMHVQLEVM		C1403	9
C0102	9	GAPAGVREV		C0302	9	FAYSSRIAI		C0303	9	FADGVILLL		C0304	9	FAADLAEEL		C0701	9	KLPPLPLTL		C0702	9	FRQLPARTL		C0704	9	FVNPVQVVL		C0801	9	APRTVALTA		C0802	9	ASDLQRHSI		C1202	9	AVLASGATF		C1203	9	AMMANRLSF		C1402	9	FTFPSDITE		C1403	9
C0102	9	GAPERAAEL		C0302	9	FAYTARISV		C0303	9	FADGVYLVL		C0304	9	FAADVRLMF		C0701	9	KMHPHPVAL		C0702	9	FRQPVVDTF		C0704	9	FVNSYPVTM		C0801	9	APSVGIKAA		C0802	9	ASDLTRIHF		C1202	9	AVNALQSVY		C1203	9	AMPYFIQVM		C1402	9	FTIFRTISV		C1403	9
C0102	9	GAPFTGSSL		C0302	9	FAYYRDLVF		C0303	9	FADHPRAPF		C0304	9	FAAGIIAHL		C0701	9	KNAQYVLVF		C0702	9	FRQQRPLEF		C0704	9	FVPLHHFYL		C0801	9	APTGDLPRA		C0802	9	ASDLVTTVF		C1202	9	AVRENIEEF		C1203	9	AMYGGLVLF		C1402	9	FVYITDNAY		C1403	9
C0102	9	GAPGAVTTL		C0302	9	FAYYRVGEY		C0303	9	FADHVSSSL		C0304	9	FAAGLGRSL		C0701	9	KNFDMVIVY		C0702	9	FRRPVLQVL		C0704	9	FVTPKVIKL		C0801	9	APVPTAPAA		C0802	9	ASDQKVKAL		C1202	9	AVRIPGGPA		C1203	9	AMYPGTFYF		C1402	9	FWPPYVELL		C1403	9
C0102	9	GAPGGACEL		C0302	9	FCMDRALEF		C0303	9	FADKHIQVL		C0304	9	FAAIGSAVF		C0701	9	KNFVHAQCL		C0702	9	FRSDISEEL		C0704	9	FVVDHVIKI		C0801	9	AQAEVYKEL		C0802	9	ASDQPSHSL		C1202	9	AVYEHPSIL		C1203	9	AMYPHIFYF		C1402	9	FYAHSLVEL		C1403	9
C0102	9	GAPLSLVDL		C0302	9	FCVDSITAL		C0303	9	FADLGYKQM		C0304	9	FAAISGMIL		C0701	9	KNSYHPVSL		C0702	9	FRSDNSFSF		C0704	9	FVVEHDFIM		C0801	9	AQCVIYHEL		C0802	9	ASDQPWSGL		C1202	9	CAAAPGAHY		C1203	9	AMYPIRSAY		C1402	9	FYAKGALQY		C1403	9
C0102	9	GGLPEGPVL		C0302	9	FFFTARTSF		C0303	9	FADLSLKSL		C0304	9	FAALHGPAL		C0701	9	KNTDIAKEL		C0702	9	FRSDSSFNF		C0704	9	FVVPYGTPL		C0801	9	AQYEHDLEV		C0802	9	ASDSGAVEL		C1202	9	CAAPILDKV		C1203	9	AQGPTPRYF		C1402	9	FYEDNVLYM		C1403	9
C0102	9	GIPAGWMGL		C0302	9	FFYKFFQEF		C0303	9	FADPHGKVF		C0304	9	FAANVYEAF		C0701	9	KNYTLVTVF		C0702	9	FRSEPALYF		C0704	9	FYAELYHII		C0801	9	ARAGVVLEM		C0802	9	ASDVGSITL		C1202	9	CAGPAYSSY		C1203	9	AQISWVTVF		C1402	9	FYEETKVKF		C1403	9
C0102	9	GIPEHADNL		C0302	9	FFYQRLVEF		C0303	9	FADPIAANL		C0304	9	FAAQRGLAV		C0701	9	KQLDFTYEM		C0702	9	FRSFVVSKF		C0704	9	FYNERVVIM		C0801	9	ASAAVLLTL		C0802	9	ASDVVFATM		C1202	9	CAIAQAESL		C1203	9	AQKNHIPVF		C1402	9	FYEGHITSL		C1403	9
C0102	9	GIPGTRGPI		C0302	9	FGEMGGKFM		C0303	9	FADQEVRSL		C0304	9	FAATHSLEF		C0701	9	KRADLQSTF		C0702	9	FRSIRPLSY		C0704	9	FYQPTCIVL		C0801	9	ASAPPGPPA		C0802	9	ASDVVLEVL		C1202	9	CSFPFKYTY		C1203	9	AQVPFEQIL		C1402	9	FYEPYSREL		C1403	9
C0102	9	GIPSAFLEL		C0302	9	FGFVRFTEY		C0303	9	FADSTVRVW		C0304	9	FAAVEGIFF		C0701	9	KRADWLARL		C0702	9	FRSPLARQL		C0704	9	FYRPHTITL		C0801	9	ASDDHTICL		C0802	9	ASEEPWTVL		C1202	9	CSSPIVVKF		C1203	9	ASAAVFSRL		C1402	9	FYFALRDTL		C1403	9
C0102	9	GLPEKVLSL		C0302	9	FGHYFETTY		C0303	9	FADVAPLQL		C0304	9	FADALCIGI		C0701	9	KRAEEILRL		C0702	9	FRTDGHPVM		C0704	9	GAHSFVLTL		C0801	9	ASDDHTVCL		C0802	9	ATDAVGIVL		C1202	9	CTYGKPVTF		C1203	9	ASFDGTIKV		C1402	9	FYFASKLVL		C1403	9
C0102	9	GMPPPHLQR		C0302	9	FGIDRPAEL		C0303	9	FADVLVHRL		C0304	9	FADELSHLL		C0701	9	KRAPGIRSW		C0702	9	FRTEFNLMY		C0704	9	GDLQRELNL		C0801	9	ASDKETYEL		C0802	9	ATDDSLHQL		C1202	9	EAIIPGSVY		C1203	9	ASFLGLPRV		C1402	9	FYGDLRKAL		C1403	9
C0102	9	GQPEAVARL		C0302	9	FGNNKLTTF		C0303	9	FADVNGWHL		C0304	9	FADEVRLSF		C0701	9	KRASYILRL		C0702	9	FRTPFPLAF		C0704	9	GDLSHIHRL		C0801	9	ASFFDRNTL		C0802	9	ATDFAENEL		C1202	9	EGGQLASCF		C1203	9	ASFPGANII		C1402	9	FYHAYDSYL		C1403	9
C0102	9	GSPVFLCAL		C0302	9	FGSEFSPEL		C0303	9	FAEARARAW		C0304	9	FADFERHFL		C0701	9	KRAYIPRTL		C0702	9	FRVDYILSV		C0704	9	GDLVKKESF		C0801	9	ASHGFYEFL		C0802	9	ATDIQVLAL		C1202	9	EVKRPGESL		C1203	9	ASFPHLRIL		C1402	9	FYHKGIASL		C1403	9
C0102	9	GTPGSRPGL		C0302	9	FGVIPSTPL		C0303	9	FAEDPPTSL		C0304	9	FADGFVKAL		C0701	9	KRCDNMRVF		C0702	9	FRVHLQYEF		C0704	9	GDYIRTGFI		C0801	9	ASHIQLDSL		C0802	9	ATDISTHSL		C1202	9	FAAASREVL		C1203	9	ASIYFCIHF		C1402	9	FYHLRIAYY		C1403	9
C0102	9	GVAIGQTSL		C0302	9	FIDKQLELL		C0303	9	FAEDSLRVI		C0304	9	FADGHVLEL		C0701	9	KRDAYVSRL		C0702	9	FRVHTVMTL		C0704	9	GDYLRVWRV		C0801	9	ASHLNLDAL		C0802	9	ATDLLSVAL		C1202	9	FAADIISVL		C1203	9	ASSPLITVF		C1402	9	FYHPETTQL		C1403	9
C0102	9	HAPDNFREL		C0302	9	FIIDDKGIL		C0303	9	FAEEQTLVL		C0304	9	FADGVILLL		C0701	9	KRFDDKYTL		C0702	9	FRVPFIYGH		C0704	9	GELKRRLGL		C0801	9	ASIPYFHAM		C0802	9	ATDPNILSL		C1202	9	FAAHLRCTY		C1203	9	ASTALVWVV		C1402	9	FYIENQKEY		C1403	9
C0102	9	HAPFTATSL		C0302	9	FIIQGLRSV		C0303	9	FAEEVGAAL		C0304	9	FADGVYLVL		C0701	9	KRFDMAVMF		C0702	9	FRVPTANVS		C0704	9	GEMPRHMQL		C0801	9	ASLLIQQAL		C0802	9	ATDPSARTL		C1202	9	FAAIGSAVF		C1203	9	ASVDKVLEL		C1402	9	FYIESISYL		C1403	9
C0102	9	HAPLSGESL		C0302	9	FIISRTQAL		C0303	9	FAEGFVKAL		C0304	9	FADHVSSSL		C0701	9	KRFEKVYTH		C0702	9	FRYTAGTPY		C0704	9	GGPGGVGGL		C0801	9	ASPSSIRSL		C0802	9	ATDRHPQAL		C1202	9	FAANVYEAF		C1203	9	ASYPHCLQF		C1402	9	FYIHEVQEL		C1403	9
C0102	9	HAPVRPVTL		C0302	9	FILEHIMVI		C0303	9	FAEGFVRAL		C0304	9	FADHVVPLL		C0701	9	KRFFEVRRV		C0702	9	FSNPYSIEY		C0704	9	GGSNVHIIL		C0801	9	ASSPEHPEL		C0802	9	ATDTKNVQF		C1202	9	FAATLEQVY		C1203	9	ASYSGLMRI		C1402	9	FYIIEREPL		C1403	9
C0102	9	HFYGKAIEL		C0302	9	FIMDRAQAL		C0303	9	FAEGKPLAL		C0304	9	FADKHIQVL		C0701	9	KRFGKAYNL		C0702	9	FYDDKKYTY		C0704	9	GILSPSIVL		C0801	9	ASYTGAETL		C0802	9	ATDYDNIEI		C1202	9	FAFDPSVNY		C1203	9	ATADTVIIY		C1402	9	FYILTSKEL		C1403	9
C0102	9	HGPGPVGAL		C0302	9	FIMGKTIEF		C0303	9	FAEGKPLEL		C0304	9	FADLGYKQM		C0701	9	KRFQPVHDL		C0702	9	FYFALRDTL		C0704	9	GLHGWAFTL		C0801	9	ATDDSLHQL		C0802	9	ATDYGGTSV		C1202	9	FAFEHSEEY		C1203	9	ATFAAVVLY		C1402	9	FYIPQRPYM		C1403	9
C0102	9	HGPRAVSCL		C0302	9	FIMINPLEY		C0303	9	FAENNFTEL		C0304	9	FADPHGKVF		C0701	9	KRFQVAVNL		C0702	9	FYGSHPWHW		C0704	9	GRMVQVHEL		C0801	9	AVADTLLVL		C0802	9	ATDYGMKSI		C1202	9	FAFLTGVGL		C1203	9	ATFPKEIQM		C1402	9	FYISPRITF		C1403	9
C0102	9	HHPDYNNEL		C0302	9	FINPKPITY		C0303	9	FAEPGRVPF		C0304	9	FADQEVRSL		C0701	9	KRFSGTVRL		C0702	9	FYHEAVVLF		C0704	9	GRNALEIVM		C0801	9	AVCGYLVEL		C0802	9	ATEEPGESF		C1202	9	FAFVTDNTY		C1203	9	ATFPVAIVM		C1402	9	FYISWAEEY		C1403	9
C0102	9	HIIAGAGEL		C0302	9	FIPFLPLEY		C0303	9	FAEQKFRKL		C0304	9	FADRSLLEM		C0701	9	KRGDFIPGL		C0702	9	FYHPETTQL		C0704	9	GRPCKIVEM		C0801	9	AVDGNTVEL		C0802	9	ATEEPGPCL		C1202	9	FAHLINVEF		C1203	9	ATIEKIIRF		C1402	9	FYITPSTSL		C1403	9
C0102	9	HIPDVITYL		C0302	9	FIRVSGSEL		C0303	9	FAESLRTSL		C0304	9	FADSTVRVW		C0701	9	KRGDILKVL		C0702	9	FYMDTSHLF		C0704	9	GSDMRTERF		C0801	9	AVIGSTEEL		C0802	9	AVDAVIAEL		C1202	9	FAHLPKSTF		C1203	9	ATIPLLVFY		C1402	9	FYITSRTQF		C1403	9
C0102	9	HIPEQTTQL		C0302	9	FIRVVGSEF		C0303	9	FAETGRTFL		C0304	9	FADVAPLQL		C0701	9	KRGDVIYIL		C0702	9	FYNERVVIM		C0704	9	GTTDHVIVL		C0801	9	CAHSFFDEL		C0802	9	AVDEAADAL		C1202	9	FAHPPRVCH		C1203	9	ATIQLIRIL		C1402	9	FYIYGVSDL		C1403	9
C0102	9	HISSQNSEL		C0302	9	FIVDARPAM		C0303	9	FAFDEIVAL		C0304	9	FADVLVHRL		C0701	9	KRGEYIKTW		C0702	9	FYNEYVREL		C0704	9	GVVDHQTEL		C0801	9	CAIAQAESL		C0802	9	AVDELFTSL		C1202	9	FAIPLIEKL		C1203	9	ATSPTVLYV		C1402	9	FYLDNVIGH		C1403	9
C0102	9	HLAEKTSSL		C0302	9	FIVEETLPL		C0303	9	FAFLTGVGL		C0304	9	FADVNGWHL		C0701	9	KRIDIIHNL		C0702	9	FYNLIHPEY		C0704	9	HAAVRSVLL		C0801	9	CAIPDLGPA		C0802	9	AVDGISLHL		C1202	9	FAIQRTTNF		C1203	9	ATVNFITSY		C1402	9	FYLDTVSAL		C1403	9
C0102	9	HLPAHSQSL		C0302	9	FIYHLPQEF		C0303	9	FAFRNFLYL		C0304	9	FAEASGLEL		C0701	9	KRIDYILVY		C0702	9	FYPLFVHMY		C0704	9	HDHPHALEF		C0801	9	CSIHDNSVL		C0802	9	AVDGNTVEL		C1202	9	FAKEVSHEM		C1203	9	ATVPFLLQL		C1402	9	FYLFHPLAY		C1403	9
C0102	9	HLPDMHSEL		C0302	9	FIYLHLSYY		C0303	9	FAFSCLLTL		C0304	9	FAEDPPTSL		C0701	9	KRINWRTVL		C0702	9	FYPPPRITL		C0704	9	HDYMKQMTF		C0801	9	EAAPDGPAL		C0802	9	AVDIPHMDI		C1202	9	FAKGTEITH		C1203	9	ATYHRAIKV		C1402	9	FYLFHVQEV		C1403	9
C0102	9	HLPPGFLHL		C0302	9	FLADPVSNM		C0303	9	FAGDIANQL		C0304	9	FAEDSLRVI		C0701	9	KRLDVEFVL		C0702	9	FYQPKIQQF		C0704	9	HELIHGSSF		C0801	9	EACGVIVEL		C0802	9	AVDKANLEI		C1202	9	FAKPENIDL		C1203	9	ATYNEIVTF		C1402	9	FYLNQSTAY		C1403	9
C0102	9	HLPPTFHAV		C0302	9	FLANVSTVL		C0303	9	FAGFQRKAV		C0304	9	FAEEPGLVL		C0701	9	KRLGIARVV		C0702	9	FYQPTCIVL		C0704	9	HEPEPHILL		C0801	9	FAAASREVL		C0802	9	AVDKAQAEL		C1202	9	FAKPFLASL		C1203	9	ATYPYQVVR		C1402	9	FYLPHGLSI		C1403	9
C0102	9	HLPSGVKSL		C0302	9	FLAPLVTEY		C0303	9	FAGGHPAQL		C0304	9	FAEEQTLVL		C0701	9	KRLKTVLEL		C0702	9	FYQRFPLSF		C0704	9	HGAPGVIYM		C0801	9	FAADIISVL		C0802	9	AVDKSYCTL		C1202	9	FAMEFVKYY		C1203	9	CAIPQVMAI		C1402	9	FYLPHVCSY		C1403	9
C0102	9	HLQEYTSTL		C0302	9	FLCGVMKTY		C0303	9	FAGLVFLHL		C0304	9	FAEEVGAAL		C0701	9	KRLNELREL		C0702	9	FYRPHTITL		C0704	9	HLMPHLLTL		C0801	9	FAADLAEEL		C0802	9	AVDKTGRIL		C1202	9	FANEPFADF		C1203	9	CAYDRIVVA		C1402	9	FYLPIAAAM		C1403	9
C0102	9	HSPAGSQAL		C0302	9	FLFDGSPTY		C0303	9	FAGNTPLHL		C0304	9	FAEGFVKAL		C0701	9	KRLNFITEY		C0702	9	FYRPLAPEL		C0704	9	HLPSGVKSL		C0801	9	FAADVRLMF		C0802	9	AVDLCGAAL		C1202	9	FANGHVNSV		C1203	9	CAYPRLEIY		C1402	9	FYLSKMISM		C1403	9
C0102	9	HSPEEAREL		C0302	9	FLFSKFIEL		C0303	9	FAGVERLAL		C0304	9	FAEGFVRAL		C0701	9	KRLQQFLEF		C0702	9	FYRVTTEQY		C0704	9	HLTPVTLEL		C0801	9	FAALHGPAL		C0802	9	AVDPNGAFL		C1202	9	FANLPNQVY		C1203	9	CLADIFRIY		C1402	9	FYLVPACSY		C1403	9
C0102	9	HSPGAVSSL		C0302	9	FLHEFSMAY		C0303	9	FAHEVGHNF		C0304	9	FAEGKPLAL		C0701	9	KRLSVERIY		C0702	9	FYSEVHPHY		C0704	9	HMHPAGIIL		C0801	9	FAANVYEAF		C0802	9	AVDPQITSL		C1202	9	FAQDVGRMF		C1203	9	CLYPDGVFY		C1402	9	FYMDTSHLF		C1403	9
C0102	9	HVITKTMEL		C0302	9	FLIDRSPEY		C0303	9	FAHLNSPQL		C0304	9	FAEGKPLEL		C0701	9	KRMQHVICV		C0702	9	FYSGSPTSY		C0704	9	HRHPDAFYL		C0801	9	FACEKNENL		C0802	9	AVDPQPSVV		C1202	9	FAQEAISVL		C1203	9	CMVEIVQKY		C1402	9	FYMVRAQAW		C1403	9
C0102	9	HVNVSGNEL		C0302	9	FLIEPFVPH		C0303	9	FAHLRLEVL		C0304	9	FAEGSTLKL		C0701	9	KRNDYVHAL		C0702	9	FYVDTVRAF		C0704	9	HRNEVTVEL		C0801	9	FACEVLYNI		C0802	9	AVDPSSVAL		C1202	9	FAQEALTVL		C1203	9	CQWDQPVRY		C1402	9	FYNEYVREL		C1403	9
C0102	9	HVPAPKLAL		C0302	9	FLKLFITEF		C0303	9	FAHPPLLVL		C0304	9	FAEPGRVPF		C0701	9	KRNEFLGEL		C0702	9	FYVPFAKAL		C0704	9	HRNGGLITL		C0801	9	FACPKTDSL		C0802	9	AVDPTSGQL		C1202	9	FAQTGIIVH		C1203	9	CSFSWTVTY		C1402	9	FYNGPVSKF		C1403	9
C0102	9	HVPEHAVVL		C0302	9	FLLDRLLQY		C0303	9	FAHPYQYEL		C0304	9	FAESLRTSL		C0701	9	KRNKIFMEF		C0702	9	GAPVAAAAL		C0704	9	HRPESVVLV		C0801	9	FADAGLVCI		C0802	9	AVDRAITHL		C1202	9	FARNKEIVH		C1203	9	CSIGFAVRY		C1402	9	FYNLIHPEY		C1403	9
C0102	9	HVPGWLRPL		C0302	9	FLLPVINEM		C0303	9	FAHQTISAL		C0304	9	FAFDEIVAL		C0701	9	KRPEFVRGY		C0702	9	GRAKTPVTL		C0704	9	HRPLDPLTM		C0801	9	FADALEVIP		C0802	9	AVDSTGTYM		C1202	9	FARSPGADL		C1203	9	CSRAYFLVL		C1402	9	FYNLSIQSF		C1403	9
C0102	9	HWEVRIKEL		C0302	9	FLMDPFAIH		C0303	9	FAHTNVESL		C0304	9	FAFESVVAI		C0701	9	KRPFGVSLL		C0702	9	GRAPGGLSL		C0704	9	HRPSHFLNF		C0801	9	FADCAILLL		C0802	9	AVDTKNNVL		C1202	9	FASEVSNVL		C1203	9	CSSDFIRIL		C1402	9	FYNNRLQAY		C1403	9
C0102	9	IAPEGSLVF		C0302	9	FLNDSYLKY		C0303	9	FAIDPHLLL		C0304	9	FAFGSPIGM		C0701	9	KRPNAILKL		C0702	9	GRFEDVYQL		C0704	9	HRTDLNPIL		C0801	9	FADDPCSSV		C0802	9	AVDTNPLSL		C1202	9	FASHVSPEV		C1203	9	CSSGLVKLW		C1402	9	FYNQVSTPL		C1403	9
C0102	9	IAPERRFYL		C0302	9	FLNFHYLTY		C0303	9	FAIDSSHPW		C0304	9	FAFIQHPSL		C0701	9	KRPRLPRKL		C0702	9	GRGPVLGPM		C0704	9	HSHPRVVEL		C0801	9	FADELSHLL		C0802	9	AVDWDPTAL		C1202	9	FASIPGLEF		C1203	9	CSSPHALVL		C1402	9	FYNTSIEEM		C1403	9
C0102	9	IAPESDYSL		C0302	9	FLNKEILEL		C0303	9	FAIETVKNL		C0304	9	FAFLTGVGL		C0701	9	KRPSSVKVF		C0702	9	GRHGVFLEL		C0704	9	HSIGSYFTL		C0801	9	FADFERHFL		C0802	9	CGDKPSISA		C1202	9	FASPMKSVV		C1203	9	CSSPIVVKF		C1402	9	FYPAKVTAV		C1403	9
C0102	9	IAPETGENL		C0302	9	FLPEAPAEL		C0303	9	FAIGGLCNL		C0304	9	FAFPGEILM		C0701	9	KRPVAVYNL		C0702	9	GRNPFVHEL		C0704	9	HSTPLIVCA		C0801	9	FADGHVLEL		C0802	9	CQDIGAKSL		C1202	9	FATEVRAVI		C1203	9	CSSPMVVKF		C1402	9	FYPDLGPEL		C1403	9
C0102	9	IAPETRRSI		C0302	9	FLRDKIASY		C0303	9	FAIGILCSL		C0304	9	FAFRNFLYL		C0701	9	KRPVFIFEW		C0702	9	GRPCKIVEM		C0704	9	HSVAHTVVL		C0801	9	FADGKVYAL		C0802	9	CSEKEGLSL		C1202	9	FATFPSSAF		C1203	9	CSVPFENKL		C1402	9	FYPEEISSM		C1403	9
C0102	9	IAPGHVSVI		C0302	9	FLREWVESM		C0303	9	FAIGLTPML		C0304	9	FAGDIANQL		C0701	9	KRPVIVKVL		C0702	9	GRPETIFQL		C0704	9	HVHEKAILL		C0801	9	FADGVYLVL		C0802	9	DADDAVYEL		C1202	9	FATHHSPEM		C1203	9	CSYPHIIRL		C1402	9	FYPEEVSSM		C1403	9
C0102	9	IAPGVTHEL		C0302	9	FLRIAFNSY		C0303	9	FAIKSLRKL		C0304	9	FAGFPSAAA		C0701	9	KRQEAIFEL		C0702	9	GRPGPIGPA		C0704	9	HVHPNYFSL		C0801	9	FADHVSSSL		C0802	9	DADQASNIL		C1202	9	FATPPSSTY		C1203	9	CTYGKPVTF		C1402	9	FYPELKLAY		C1403	9
C0102	9	IAPHARNGL		C0302	9	FLRVPTASY		C0303	9	FAILIHDVL		C0304	9	FAGGHPAQL		C0701	9	KRQEVIYEL		C0702	9	GRPLFPHVL		C0704	9	HVIHHTTVV		C0801	9	FADHVVPLL		C0802	9	DDSLPVLLE		C1202	9	FAVPHTYNY		C1203	9	EAADIIQKL		C1402	9	FYPFAGHDL		C1403	9
C0102	9	IAPKPAAHL		C0302	9	FLYDKALTF		C0303	9	FAILRQAEL		C0304	9	FAGLVFLHL		C0701	9	KRREPIPSL		C0702	9	GRQIKPYTL		C0704	9	HVNQYDIVL		C0801	9	FADKHIQVL		C0802	9	DTNIVLGAL		C1202	9	FAVVPSTAT		C1203	9	EAAEVILRV		C1402	9	FYPGLGLAL		C1403	9
C0102	9	IAPKSTSVF		C0302	9	FLYPFFGVL		C0303	9	FAINNSKSF		C0304	9	FAGVERLAL		C0701	9	KRSELVNWY		C0702	9	GRSCIILEF		C0704	9	HVPEHAVVL		C0801	9	FADKTLLEL		C0802	9	EADFPKNPL		C1202	9	FAYEGPMYL		C1203	9	EAANFIMKV		C1402	9	FYPHHPQML		C1403	9
C0102	9	IAPLRVLSF		C0302	9	FLYPFPLAL		C0303	9	FAIPGSIFL		C0304	9	FAHDSTRVI		C0701	9	KRSNYITRL		C0702	9	GRSEYVEKF		C0704	9	HVQPRTIYL		C0801	9	FADNPGPMV		C0802	9	EADGAAWVL		C1202	9	FAYHYPYTY		C1203	9	EAFQGTKVF		C1402	9	FYPIYFRPL		C1403	9
C0102	9	IAPNGALQL		C0302	9	FLYSGHLAL		C0303	9	FAIPGSSFL		C0304	9	FAHLNSPQL		C0701	9	KRVEDAYIL		C0702	9	GRYQVSWSL		C0704	9	IAPGVTHEL		C0801	9	FADPIAANL		C0802	9	EADGVHNTL		C1202	9	FAYLGRLAH		C1203	9	EAFYNVITV		C1402	9	FYPPDPAQL		C1403	9
C0102	9	IAPQRIPSL		C0302	9	FNRWFAEKF		C0303	9	FAIPLIEKL		C0304	9	FAHLRLEVL		C0701	9	KRVFPKWTY		C0702	9	GSLRVLVLR		C0704	9	IAPSHVIEM		C0801	9	FADQAEILL		C0802	9	EADRAQQYF		C1202	9	FAYMPNNSL		C1203	9	EAIGAVIHY		C1402	9	FYPPKVELF		C1403	9
C0102	9	IAPSRKVTF		C0302	9	FNYPGGVAM		C0303	9	FAIPMIHAV		C0304	9	FAHPPLLVL		C0701	9	KRVTWIVEF		C0702	9	GYFLRAWNY		C0704	9	IDHPHTHVV		C0801	9	FADQEVRSL		C0802	9	EAEIPGANL		C1202	9	FAYPAIRYL		C1203	9	EAVDWLHEL		C1402	9	FYPPLTSSL		C1403	9
C0102	9	IAPSRPWAL		C0302	9	FPVFLAILI		C0303	9	FAIPVGSGL		C0304	9	FAHPYQYEL		C0701	9	KRWESERIL		C0702	9	HAPFTATSL		C0704	9	IDLLRVIHV		C0801	9	FADQTAVQL		C0802	9	EESILDLVL		C1202	9	FAYTVKYVL		C1203	9	EAVKWMVVF		C1402	9	FYPPPRITL		C1403	9
C0102	9	IFEAAKQEL		C0302	9	FQNPFRSEL		C0303	9	FAIQKGLQA		C0304	9	FAHTNVESL		C0701	9	KRWESERVL		C0702	9	HRAEVTEEF		C0704	9	IEKGHGIRL		C0801	9	FADREVQLL		C0802	9	EGDLPNAVL		C1202	9	FGADVVSKF		C1203	9	EAVPHVLQI		C1402	9	FYPSGGLEV		C1403	9
C0102	9	IFEGGATEL		C0302	9	FQNPSTVTL		C0303	9	FAISILQQI		C0304	9	FAIDPHLLL		C0701	9	KRYHIAKVY		C0702	9	HRAVFPIYL		C0704	9	IINSNPIEL		C0801	9	FADVAPLQL		C0802	9	EIDLQKMPL		C1202	9	FGKAPGTPH		C1203	9	EAYNAVVRY		C1402	9	FYPYGLQTF		C1403	9
C0102	9	IFQTAKETL		C0302	9	FQRPNALAV		C0303	9	FAISKNIQL		C0304	9	FAIGLTPML		C0701	9	KRYPECRDL		C0702	9	HRFYMFHSF		C0704	9	ILMEHIHKL		C0801	9	FADYLAHES		C0802	9	EIDVPSHEL		C1202	9	FGYDYPSVL		C1203	9	ESYGNPLRV		C1402	9	FYQDKLKSL		C1403	9
C0102	9	IFRVNLRTL		C0302	9	FQYESKVFY		C0303	9	FAKPENIDL		C0304	9	FAIGVNFLI		C0701	9	KRYQEALHL		C0702	9	HRFYMHHSF		C0704	9	INSSVHVIM		C0801	9	FADYNLLDL		C0802	9	ESDDPNLAA		C1202	9	FGYPDPTYL		C1203	9	ETISLIIHY		C1402	9	FYQGHVEGY		C1403	9
C0102	9	IFVPARNNM		C0302	9	FQYPDTRYL		C0303	9	FALAKGECM		C0304	9	FAIHKKIVL		C0701	9	KSFEDIHHY		C0702	9	HRGEVPCTV		C0704	9	IRHPNIITL		C0801	9	FADYPCHTV		C0802	9	ESDYSKESL		C1202	9	FIAPTGHSL		C1203	9	ETLALLEVK		C1402	9	FYQHNVEKL		C1403	9
C0102	9	IGPTTARAL		C0302	9	FQYSKSPSL		C0303	9	FALDMKYAL		C0304	9	FAIKSLRKL		C0701	9	KSFEDIHQY		C0702	9	HRGPDAFRF		C0704	9	IRLENEIQT		C0801	9	FADYRPTEV		C0802	9	EVDGKQVEL		C1202	9	FIIPQIVKY		C1203	9	FAADIISVL		C1402	9	FYQPKIQQF		C1403	9
C0102	9	IINDLLQSL		C0302	9	FSAPLFLSH		C0303	9	FALDSGLEI		C0304	9	FAILIHDVL		C0701	9	KSFEGLFYF		C0702	9	HRHPDAFYL		C0704	9	IRMEHVKIV		C0801	9	FAEAGRSTL		C0802	9	EVDHPGPAL		C1202	9	FIIQGLRSV		C1203	9	FAADLAEEL		C1402	9	FYQPTCIVL		C1403	9
C0102	9	IINGEATML		C0302	9	FSEPFHLIV		C0303	9	FALGAALQL		C0304	9	FAILRQAEL		C0701	9	KSKDFVQVM		C0702	9	HRKDYINAY		C0704	9	IRMEVGPTM		C0801	9	FAEDPPTSL		C0802	9	EVDPGSAEL		C1202	9	FIKASSMSH		C1203	9	FAAFLASRL		C1402	9	FYQRFPLSF		C1403	9
C0102	9	IIPVGGTYL		C0302	9	FSEPHARFY		C0303	9	FALGAGTAL		C0304	9	FAINNSKSF		C0701	9	KSLGVHYVF		C0702	9	HRKPMFNIH		C0704	9	IRNDYYLNL		C0801	9	FAEEPGLVL		C0802	9	FACEKNENL		C1202	9	FIKDGSSTY		C1203	9	FAAGIIAHL		C1402	9	FYRPLAPEL		C1403	9
C0102	9	IIPYITNVL		C0302	9	FSFDGPEIM		C0303	9	FALGKILSV		C0304	9	FAIPGSSFL		C0701	9	KSNPKPLVL		C0702	9	HRLPPVTSF		C0704	9	IRPEHVLRL		C0801	9	FAEESYQKL		C0802	9	FADAGLVCI		C1202	9	FIKDRILVY		C1203	9	FAAHLRCTY		C1402	9	FYTVAVTSL		C1403	9
C0102	9	IIYTAKISL		C0302	9	FSFHHVLSL		C0303	9	FALGPVASV		C0304	9	FAIPLIEKL		C0701	9	KSTDVAKTF		C0702	9	HRNEVTVEL		C0704	9	IRPEYAWIV		C0801	9	FAEEVGAAL		C0802	9	FADAHSNLA		C1202	9	FIKEIGYTH		C1203	9	FAASFAHLL		C1402	9	FYVDTVRAF		C1403	9
C0102	9	IKEPIWETL		C0302	9	FSFVFKPVF		C0303	9	FALGVYRTL		C0304	9	FAIPMIHAV		C0701	9	KSTPVTVVL		C0702	9	HRNFKPVVY		C0704	9	IRPGTAFEL		C0801	9	FAFLISERL		C0802	9	FADAMEVIP		C1202	9	FIMGKTIEF		C1203	9	FAATVITTI		C1402	9	FYVPFAKAL		C1403	9
C0102	9	ILISTPESL		C0302	9	FSFVRITAL		C0303	9	FALLAGTAV		C0304	9	FAIQKGLQA		C0701	9	KSYSVGVAY		C0702	9	HRNGGLITL		C0704	9	IRSSYIRVL		C0801	9	FAGDDAPRA		C0802	9	FADAVQELL		C1202	9	FINGDISSL		C1203	9	FADSTVRVW		C1402	9	FYVRLIDSM		C1403	9
C0102	9	ILPEQHMSL		C0302	9	FSFYFHEAL		C0303	9	FALNLFKHL		C0304	9	FAISILQQI		C0701	9	KTFPYQHRY		C0702	9	HRNLIEIGY		C0704	9	ISNPNSIIL		C0801	9	FAGYSEEVL		C0802	9	FADDGVKYL		C1202	9	FINPKPITY		C1203	9	FAFCYPFSY		C1402	9	FYYGGQVNY		C1403	9
C0102	9	ILPISQESL		C0302	9	FSHAQTVVL		C0303	9	FALPFGRTA		C0304	9	FAIYKMSFF		C0701	9	KTFVHTVHL		C0702	9	HRNPLPEYL		C0704	9	ITQIEHEVS		C0801	9	FAHCLELTV		C0802	9	FADDPCSSV		C1202	9	FIQTRGGTF		C1203	9	FAFDEIVAL		C1402	9	FYYIRISEL		C1403	9
C0102	9	ILPLRNWLL		C0302	9	FSHEVGSEL		C0303	9	FALPGNSQL		C0304	9	FAKPENIDL		C0701	9	KTIDYIQFL		C0702	9	HRPEATPSM		C0704	9	ITVGHETVM		C0801	9	FAHHLPVWL		C0802	9	FADDYKIAI		C1202	9	FIRVVGSEF		C1203	9	FAFDPSVNY		C1402	9	GFMPGAHVF		C1403	9
C0102	9	ILPPSAHEL		C0302	9	FSIEPWLKV		C0303	9	FALPILNAL		C0304	9	FALDMKYAL		C0701	9	KTKEVYELL		C0702	9	HRPEFSSCL		C0704	9	IVMEHVVFL		C0801	9	FAHIDGDHL		C0802	9	FADEGSIFY		C1202	9	FIVDARPAM		C1203	9	FAFEEAIGY		C1402	9	GFPEAASSF		C1403	9
C0102	9	IMPNVTISL		C0302	9	FSIPILMQL		C0303	9	FALPVGLIV		C0304	9	FALDSGLEI		C0701	9	KTKPFQLQL		C0702	9	HRPGIVVDY		C0704	9	IVMPNILVL		C0801	9	FAHPPLLVL		C0802	9	FADELSHLL		C1202	9	FIYHLPQEF		C1203	9	FAFEGILIK		C1402	9	GFPEQATAF		C1403	9
C0102	9	ISPDTVGTL		C0302	9	FSITPLSEL		C0303	9	FALPYIRDV		C0304	9	FALGSPIAM		C0701	9	KTNAIPLTL		C0702	9	HRPSHFLNF		C0704	9	IVNEYAFLL		C0801	9	FAHPYQYEL		C0802	9	FADENNEKL		C1202	9	FIYQNPHIF		C1203	9	FAFEHSEEY		C1402	9	GFPSSVAAL		C1403	9
C0102	9	ISPEFFTVL		C0302	9	FSKWWINEF		C0303	9	FALPYVIVL		C0304	9	FALGVYRTL		C0701	9	KTNDYCKSL		C0702	9	HRQGFSYDY		C0704	9	IVPGNVKSL		C0801	9	FAHRIWDTL		C0802	9	FADEVRLSF		C1202	9	FLAPLVTEY		C1203	9	FAFESVVAI		C1402	9	GYAPYVNRI		C1403	9
C0102	9	ISPENHISL		C0302	9	FSLEELRVA		C0303	9	FALSEAMGL		C0304	9	FALKGLRTL		C0701	9	KTNEMLLNF		C0702	9	HRSWWVYTL		C0704	9	IYNTTELVM		C0801	9	FAHTNVESL		C0802	9	FADFERHFL		C1202	9	FLAPPGAYY		C1203	9	FAFFDPVMY		C1402	9	GYLAASQSF		C1403	9
C0102	9	ISPEPKTEM		C0302	9	FSLPPGHAV		C0303	9	FALSGPLFL		C0304	9	FALLAGTAV		C0701	9	KTNHVFFLL		C0702	9	HRTDLNPIL		C0704	9	KAMDDTFYL		C0801	9	FAHVIFQNV		C0802	9	FADFLQAHL		C1202	9	FLFDGSPTY		C1203	9	FAFGGLCER		C1402	9	GYLPLAHVL		C1403	9
C0102	9	ISPETMVAL		C0302	9	FSNAHMIMY		C0303	9	FALSQPRAM		C0304	9	FALLTTPEM		C0701	9	KTPEEVIEY		C0702	9	HRVAQAWEL		C0704	9	KANHAELIL		C0801	9	FAIDIGGSL		C0802	9	FADFLVYEF		C1202	9	FLIDRSPEY		C1203	9	FAFGSPIGM		C1402	9	GYMVMGDSF		C1403	9
C0102	9	ISPFHDIPI		C0302	9	FSNDIPHVV		C0303	9	FAMDVYKNL		C0304	9	FALNLFKHL		C0701	9	KTPNFSTLL		C0702	9	HRWEVCLTM		C0704	9	KANPALYVL		C0801	9	FAIDPHLLL		C0802	9	FADFMVKDV		C1202	9	FLKEIVETF		C1203	9	FAFMVVNNL		C1402	9	GYPEVALHF		C1403	9
C0102	9	ISPKVKMAL		C0302	9	FSNGHIKVL		C0303	9	FAMEIDPSL		C0304	9	FALPAYHTL		C0701	9	KTSDFLKVL		C0702	9	HRYENVSIL		C0704	9	KAPEPLSSL		C0801	9	FAIPGSSFL		C0802	9	FADGFVKAL		C1202	9	FLKEVVETF		C1203	9	FAFPGEILM		C1402	9	GYVLYASAM		C1403	9
C0102	9	ISPPPTANL		C0302	9	FSNPFFVNY		C0303	9	FAMIPAKEA		C0304	9	FALPFGRTA		C0701	9	KTSDVYWVL		C0702	9	HRYEVVTEL		C0704	9	KAPGSTSNL		C0801	9	FAIPLIEKL		C0802	9	FADGFVLVY		C1202	9	FLRDKIASY		C1203	9	FAFPLHVDY		C1402	9	GYYSHALYL		C1403	9
C0102	9	ISPRFDVQL		C0302	9	FSNPRALYL		C0303	9	FAMIVSSAL		C0304	9	FALPGNSQL		C0701	9	KTSPYPIIL		C0702	9	HRYPAVHVY		C0704	9	KASDLYITL		C0801	9	FAIPMIHAV		C0802	9	FADGHVLEL		C1202	9	FLRDPARVF		C1203	9	FAFRHVLKL		C1402	9	HFIEKAHTL		C1403	9
C0102	9	ITPAAFSTL		C0302	9	FSNPYSIEY		C0303	9	FAMKEFIAT		C0304	9	FALPILNAL		C0701	9	KTYDYLFKL		C0702	9	HYGQSGISM		C0704	9	KDFLKIFTF		C0801	9	FAISILQQI		C0802	9	FADGKVYAL		C1202	9	FLREWVESM		C1203	9	FAFRNFLYL		C1402	9	HFIFFVQEF		C1403	9
C0102	9	ITPDKVRGL		C0302	9	FSPFHASVL		C0303	9	FAMPPPHGM		C0304	9	FALPYIRDV		C0701	9	KVAGIAKVL		C0702	9	HYKPTPLYF		C0704	9	KDIEHALSV		C0801	9	FALDSGLEI		C0802	9	FADGLSLGL		C1202	9	FQAEIAQLM		C1203	9	FAFRYVTTI		C1402	9	HFIRPGNAL		C1403	9
C0102	9	ITPGGFSSV		C0302	9	FSQDHLVIY		C0303	9	FAMPYFIQV		C0304	9	FALPYVIVL		C0701	9	KVFEYHNVL		C0702	9	HYLPVKIIL		C0704	9	KDLIHDVSF		C0801	9	FALNLFKHL		C0802	9	FADGVILLL		C1202	9	FQAPTAKEM		C1203	9	FAFSCLLTL		C1402	9	HFITPVSTL		C1403	9
C0102	9	ITPLGSSEL		C0302	9	FSQSSLALH		C0303	9	FAMQLVKIL		C0304	9	FALRPTFDL		C0701	9	KVKEFFEKL		C0702	9	HYPDFHQEL		C0704	9	KDNERVVGF		C0801	9	FALPILNAL		C0802	9	FADGVYLVL		C1202	9	FSAPLFLSH		C1203	9	FAFSGVLRA		C1402	9	HFLEVAREL		C1403	9
C0102	9	ITPSTQQHL		C0302	9	FSSDVTHEM		C0303	9	FAMYPPSMI		C0304	9	FALSGPLFL		C0701	9	KVNGRPLEM		C0702	9	HYPDYSWSA		C0704	9	KEALPKAAF		C0801	9	FALSKDASL		C0802	9	FADHVSSSL		C1202	9	FSCGVISTL		C1203	9	FAFTPSRIY		C1402	9	HFLQQPRPL		C1403	9
C0102	9	IVAKHTSAL		C0302	9	FSSPVCMAF		C0303	9	FANAHTYHI		C0304	9	FALSQPRAM		C0701	9	KVPPFVFFF		C0702	9	HYPPVQVLF		C0704	9	KECMRALGF		C0801	9	FAMAGHENL		C0802	9	FADHVVPLL		C1202	9	FSEPFHLIV		C1203	9	FAFVTDNTY		C1402	9	HFNPTGSAF		C1403	9
C0102	9	IVPDGTLQL		C0302	9	FSSWVQLEV		C0303	9	FANEPFADF		C0304	9	FALSVTNPL		C0701	9	KVPTFVRML		C0702	9	HYRPPEVIL		C0704	9	KELERVTSL		C0801	9	FAMDVYKNL		C0802	9	FADKHIQVL		C1202	9	FSFDGPEIM		C1203	9	FAGASIKIA		C1402	9	HFNVTNTTF		C1403	9
C0102	9	IVPGNVKSL		C0302	9	FSTPVFNLV		C0303	9	FANERCLQL		C0304	9	FALVGSYTL		C0701	9	KVSDYEMKL		C0702	9	HYSPIYLSF		C0704	9	KELLRVAQI		C0801	9	FAMEIDPSL		C0802	9	FADLGYKQM		C1202	9	FSHIPEASF		C1203	9	FAGFLPRII		C1402	9	HFPDLFHVM		C1403	9
C0102	9	IVPHGYTEV		C0302	9	FSVDQLMEL		C0303	9	FANKQMNQI		C0304	9	FAMAGHENL		C0701	9	KYADKIYSI		C0702	9	HYVEKPSTF		C0704	9	KEMLPHVGV		C0801	9	FAMPYFIQV		C0802	9	FADLLGTAF		C1202	9	FSIDSPDSL		C1203	9	FAGWLCKTL		C1402	9	HFPGLASEL		C1403	9
C0102	9	IVPTGKTGL		C0302	9	FSVDSPRIY		C0303	9	FANLKYVSL		C0304	9	FAMDVYKNL		C0701	9	KYFDEHYEY		C0702	9	HYYSITINY		C0704	9	KEQERIFQL		C0801	9	FANDDRHVM		C0802	9	FADLNLAEF		C1202	9	FSKAKPSVL		C1203	9	FAHDSTRVI		C1402	9	HFPMQSREF		C1403	9
C0102	9	IVTERLVAL		C0302	9	FSVEGQLEF		C0303	9	FANLPNQVH		C0304	9	FAMEIDPSL		C0701	9	KYFEKQFEL		C0702	9	IAPGVTHEL		C0704	9	KEQMRIQSL		C0801	9	FANLIKEFV		C0802	9	FADNDVSRF		C1202	9	FSKDIVENY		C1203	9	FAHHLPVWL		C1402	9	HFQEKVESL		C1403	9
C0102	9	KAMEAASSL		C0302	9	FSVNLFRTL		C0303	9	FANLPNQVY		C0304	9	FAMFSGTHV		C0701	9	KYFLQQWEL		C0702	9	IHPVVITSF		C0704	9	KEVERILGL		C0801	9	FAQEAISVL		C0802	9	FADNPGPMV		C1202	9	FSKPSSDTF		C1203	9	FAHLPKSTF		C1402	9	HFYGKAIEL		C1403	9
C0102	9	KAPDFLPLL		C0302	9	FSWLFHTVY		C0303	9	FANNVQLSL		C0304	9	FAMIPAKEA		C0701	9	KYIGYARQY		C0702	9	IHSPVVNEL		C0704	9	KGSGVVIIM		C0801	9	FAQEALTVL		C0802	9	FADPIAANL		C1202	9	FSMYKPITY		C1203	9	FAHPYQYEL		C1402	9	HFYLKALSL		C1403	9
C0102	9	KAPEMTNEL		C0302	9	FSYAFPKAV		C0303	9	FAQAPQLSV		C0304	9	FAMIVSSAL		C0701	9	KYMDVQFDF		C0702	9	IKADHVSTY		C0704	9	KINEAFIEM		C0801	9	FAQGDVITL		C0802	9	FADQAEILL		C1202	9	FSNDIYSTY		C1203	9	FAHVIFQNV		C1402	9	HFYRSLVAH		C1403	9
C0102	9	KAPEPLSSL		C0302	9	FSYAFPKEF		C0303	9	FAQDVGRMF		C0304	9	FAMPPPHGM		C0701	9	KYNACILEY		C0702	9	IKPETILYY		C0704	9	KINELELRL		C0801	9	FAQTLHPSL		C0802	9	FADQENQVA		C1202	9	FSNGHIKVL		C1203	9	FAIEREFFF		C1402	9	HYFFAVSTL		C1403	9
C0102	9	KAPEPPPAL		C0302	9	FSYDTFVDY		C0303	9	FAQEAISVL		C0304	9	FAMPYFIQV		C0701	9	LLNSNIPLE		C0702	9	IKSDVHLNF		C0704	9	KINMLVIEL		C0801	9	FASDVQFVL		C0802	9	FADQEVRSL		C1202	9	FSNPYSIEY		C1203	9	FAIHKKIVL		C1402	9	HYIDRVRAL		C1403	9
C0102	9	KAPGFAQML		C0302	9	FSYVTPRAF		C0303	9	FAQEALTVL		C0304	9	FAMQLVKIL		C0701	9	LQIDNARLA		C0702	9	ILTERGYSF		C0704	9	KIPAHRVVL		C0801	9	FASEVSNVL		C0802	9	FADQVEEIL		C1202	9	FSQDHLVIY		C1203	9	FAIPLIEKL		C1402	9	HYIIAARAL		C1403	9
C0102	9	KAPGFRPPL		C0302	9	FTADPLSLL		C0303	9	FAQKSGYFL		C0304	9	FAMYPPSMI		C0701	9	LRDHSVRVL		C0702	9	IPPLVCNPE		C0704	9	KIPNFCVLL		C0801	9	FASFPHMVL		C0802	9	FADREVQLL		C1202	9	FSSDLISIH		C1203	9	FAIPMIHAV		C1402	9	HYINEVLFL		C1403	9
C0102	9	KAPGSTSNL		C0302	9	FTAPATVSL		C0303	9	FAQMYQKTL		C0304	9	FANEPFADF		C0701	9	LRGDFVRRL		C0702	9	IRGPTQHEL		C0704	9	KLHEYFPEM		C0801	9	FASHVSPEV		C0802	9	FADVAPLQL		C1202	9	FSSDVTHEM		C1203	9	FAISILQQI		C1402	9	HYITPMMEL		C1403	9
C0102	9	KAPLSKVRL		C0302	9	FTDASFLTL		C0303	9	FAQPSGLSL		C0304	9	FANFGVLRL		C0701	9	LRHPAIRVL		C0702	9	IRKPYIWEY		C0704	9	KNTDLWIVM		C0801	9	FASSFKIVL		C0802	9	FADVEGKNL		C1202	9	FSSPSTSTF		C1203	9	FAIWHIIAF		C1402	9	HYMSINDSF		C1403	9
C0102	9	KAPQTPSAL		C0302	9	FTIFRTISV		C0303	9	FAQTLHPSL		C0304	9	FANLKYVSL		C0701	9	LRLSYPLEL		C0702	9	IRMTYIKEL		C0704	9	KRCDIILVM		C0801	9	FASTMVHAL		C0802	9	FADVNGWHL		C1202	9	FSYAFPKEF		C1203	9	FAKDFMTYL		C1402	9	HYNNIMALY		C1403	9
C0102	9	KAPSSNTDL		C0302	9	FTIKELREM		C0303	9	FAQYLISEL		C0304	9	FANMLGVSL		C0701	9	LRNKVIIEY		C0702	9	IRNDYYLNL		C0704	9	KRGDVIYIL		C0801	9	FASYMEQHL		C0802	9	FADWYLEQL		C1202	9	FSYQHAIEE		C1203	9	FAKPFLASL		C1402	9	HYPDFHQEL		C1403	9
C0102	9	KAPVGPVTM		C0302	9	FTMPLHMTF		C0303	9	FARPASPSL		C0304	9	FANNVQLSL		C0701	9	LRNPDIRVL		C0702	9	IRPDNMSEY		C0704	9	KRMQHVICV		C0801	9	FATADEYHL		C0802	9	FADYNLLDL		C1202	9	FTADVRSVL		C1203	9	FAKVHILYV		C1402	9	HYPNWFKAL		C1403	9
C0102	9	KAPVNTAEL		C0302	9	FTNPWTKEL		C0303	9	FASDVQFVL		C0304	9	FAQAPQLSV		C0701	9	LRNQSVFNF		C0702	9	IRPEHVLRL		C0704	9	KRQEAIFEL		C0801	9	FATEVRAVI		C0802	9	FADYPCHTV		C1202	9	FTFTPTVTY		C1203	9	FALPFGRTA		C1402	9	HYQAIVTAY		C1403	9
C0102	9	KAPVTKVAA		C0302	9	FTSEKFLVM		C0303	9	FASELSRSL		C0304	9	FAQEAISVL		C0701	9	LRPGVRHPL		C0702	9	IRPEIHENY		C0704	9	KRQEVIYEL		C0801	9	FATGSADAL		C0802	9	FADYRPTEV		C1202	9	FTHASPTLF		C1203	9	FALPYPRFR		C1402	9	HYQPVDVSL		C1403	9
C0102	9	KFHPNGSTL		C0302	9	FTSLPGSTM		C0303	9	FASETNLDF		C0304	9	FAQEALTVL		C0701	9	LRPSTSRSL		C0702	9	IRPENVIIY		C0704	9	KRVTWIVEF		C0801	9	FAVATPEEL		C0802	9	FAEAGRSTL		C1202	9	FTITKTVEY		C1203	9	FALPYVIVL		C1402	9	HYYDLALAF		C1403	9
C0102	9	KFWERFIAL		C0302	9	FTSPVSLEA		C0303	9	FASEVSNVL		C0304	9	FAQGDVITL		C0701	9	LRSGVIVRL		C0702	9	IRPEYAWIV		C0704	9	KSIHIVVTM		C0801	9	FAVEEGDHL		C0802	9	FAEASGLEL		C1202	9	FTKPPIAAH		C1203	9	FALVFPLMY		C1402	9	HYYGPALEF		C1403	9
C0102	9	KGPPAALTL		C0302	9	FTTHVMNLL		C0303	9	FASEYPLIL		C0304	9	FAQHGGIYV		C0701	9	MAPLKMLAL		C0702	9	IRPGTAFEL		C0704	9	KSNGTIIHV		C0801	9	FAVHPEPEA		C0802	9	FAEAVGVQL		C1202	9	FTLDNILSH		C1203	9	FAMEFVKYY		C1402	9	HYYQKALEL		C1403	9
C0102	9	KIAEGVNSL		C0302	9	FTVGKLGPF		C0303	9	FASFPHMVL		C0304	9	FAQKSGYFL		C0701	9	MQNPNAIIL		C0702	9	IRPQVVTTF		C0704	9	KSTPVTVVL		C0801	9	FAVLEDHTL		C0802	9	FAEDPPTSL		C1202	9	FTMPLHMTF		C1203	9	FAMFSGTHV		C1402	9	HYYSITINY		C1403	9
C0102	9	KIAEKTAAL		C0302	9	FTVMPGQTL		C0303	9	FASGAFLHI		C0304	9	FAQMYQKTL		C0701	9	MRNAVCIFY		C0702	9	IRQDNERVL		C0704	9	KVPVHVIRM		C0801	9	FAVNMFRTL		C0802	9	FAEEFAHSI		C1202	9	FTNKITSVH		C1203	9	FAMPYFIQV		C1402	9	IDKTMLASL		C1403	9
C0102	9	KIHSSFRSL		C0302	9	FTVPHTHVF		C0303	9	FASHVSPEV		C0304	9	FAQPSGLSL		C0701	9	NRFNYPFEL		C0702	9	IRSSYIRVL		C0704	9	KVSPNELIL		C0801	9	FAVPENSSV		C0802	9	FAEEPGLVL		C1202	9	FTRSINITH		C1203	9	FAMYPPSMI		C1402	9	IFEGGATEL		C1403	9
C0102	9	KIITKAKSL		C0302	9	FTYDQRTEF		C0303	9	FASIAGLEF		C0304	9	FAQQMQLML		C0701	9	NRGDFFMTL		C0702	9	IRTDFNILY		C0704	9	KVSPTEIVL		C0801	9	FAVPESDHL		C0802	9	FAEEQTLVL		C1202	9	FTVPHTHVF		C1203	9	FANERCLQL		C1402	9	IFFPGVSEF		C1403	9
C0102	9	KILDKSQAL		C0302	9	FTYKGLRAL		C0303	9	FASIPGLEF		C0304	9	FAQTLHPSL		C0701	9	NRGEVVTSF		C0702	9	IRVDKITEY		C0704	9	KYKDNPFSL		C0801	9	FAVSDGLEL		C0802	9	FAEERNQNL		C1202	9	FVITKPDVY		C1203	9	FANLGRTTL		C1402	9	IFIDEIDSF		C1403	9
C0102	9	KIPDISSFL		C0302	9	FVADVRLIF		C0303	9	FASLPDPVL		C0304	9	FASDIAPFL		C0701	9	NRHGLIRKY		C0702	9	IYAPKLQEF		C0704	9	LASPVSPEL		C0801	9	FAVVPSTAT		C0802	9	FAEEVGAAL		C1202	9	FVKDSGACF		C1203	9	FAQAMMSVL		C1402	9	IFIDEIDSI		C1403	9
C0102	9	KIPDKTERL		C0302	9	FVALPGVAV		C0303	9	FASPNGEQF		C0304	9	FASDVQFVL		C0701	9	PIRPDIVNF		C0702	9	IYATRLIQM		C0704	9	LKPPHVILV		C0801	9	FAYEGPMYL		C0802	9	FAEGFVKAL		C1202	9	FVKPAFEEF		C1203	9	FAQEAISVL		C1402	9	IFIDEVDSL		C1403	9
C0102	9	KIPEDQHAL		C0302	9	FVAPPTAAV		C0303	9	FASQSMPTI		C0304	9	FASELSRSL		C0701	9	QQNPQPLIF		C0702	9	IYAVNGIAF		C0704	9	LLPEHFLFL		C0801	9	FAYPAPLEV		C0802	9	FAEGFVRAL		C1202	9	FVKVVPTVY		C1203	9	FAQEALTVL		C1402	9	IFIKDSNSL		C1403	9
C0102	9	KIPEDVSGL		C0302	9	FVEVGRVAY		C0303	9	FASSPLRVL		C0304	9	FASETNLDF		C0701	9	QRAEIIHHL		C0702	9	IYGEKTYAF		C0704	9	LNMDHTVVL		C0801	9	FAYVEGESL		C0802	9	FAEGKPLAL		C1202	9	FVNDYILYY		C1203	9	FAQHGGIYV		C1402	9	IFIPKTEEM		C1403	9
C0102	9	KIPEESKAL		C0302	9	FVFGFRTHF		C0303	9	FASTYLLLL		C0304	9	FASEVSNVL		C0701	9	QRAHQILVL		C0702	9	IYKDLPFET		C0704	9	LQIDNARLA		C0801	9	FGHIFNDAL		C0802	9	FAEQPSVKL		C1202	9	FVNPGVVEF		C1203	9	FAQQQPPVV		C1402	9	IFIPSSIAF		C1403	9
C0102	9	KIPTCKITL		C0302	9	FVFKGFDAL		C0303	9	FATDAILAT		C0304	9	FASEYPLIL		C0701	9	QRGDLIRIL		C0702	9	IYKELLISL		C0704	9	LRHPNIVHM		C0801	9	FGHVQRAEM		C0802	9	FAERSVAKL		C1202	9	FVNPHVSSF		C1203	9	FAQYLISEL		C1402	9	IFMDEIDSI		C1403	9
C0102	9	KIQEAVKAL		C0302	9	FVFPGELLL		C0303	9	FATDSGLEF		C0304	9	FASFPHMVL		C0701	9	QRMNFLVTL		C0702	9	IYPDSFTVL		C0704	9	LRHPNIVSL		C0801	9	FGHYQQAEL		C0802	9	FAETIETVL		C1202	9	FVRDMIREV		C1203	9	FASEVSNVL		C1402	9	IFMENRNEF		C1403	9
C0102	9	KLIAKVRCL		C0302	9	FVHEFFYSF		C0303	9	FATEGLRTL		C0304	9	FASGAFLHI		C0701	9	QRNLFILAY		C0702	9	IYPEVVHMF		C0704	9	LRPPYQISM		C0801	9	FGIDRPAEL		C0802	9	FAEWKVDML		C1202	9	FVRENVWTY		C1203	9	FASEYPLIL		C1402	9	IFNTVNTSL		C1403	9
C0102	9	KLPAFSPLM		C0302	9	FVIETARQL		C0303	9	FATEVRAVI		C0304	9	FASHVSPEV		C0701	9	QRNPEISHL		C0702	9	IYPGHGMMF		C0704	9	LRSDSYVEL		C0801	9	FGLNIFHQL		C0802	9	FAGYSEEVL		C1202	9	FVRNVPWEF		C1203	9	FASFIVQYY		C1402	9	IFNVAGYSH		C1403	9
C0102	9	KLPDGFSQL		C0302	9	FVIHNLPVL		C0303	9	FATFPSSAF		C0304	9	FASIPGLEF		C0701	9	QRNPEISHM		C0702	9	IYPVNAISF		C0704	9	LSHPLALHL		C0801	9	FGSEFSPEL		C0802	9	FAIDPHLLL		C1202	9	GALAPGTPA		C1203	9	FASFPHMVL		C1402	9	IFPAKTITY		C1403	9
C0102	9	KLPEKWESV		C0302	9	FVIPVVQAL		C0303	9	FATGVWHQM		C0304	9	FASLPDPVL		C0701	9	QRNVNIFKF		C0702	9	IYPYVIQEL		C0704	9	LVHTEVVEL		C0801	9	FGVDPDKEL		C0802	9	FAIPLIEKL		C1202	9	GAPVAAAAL		C1203	9	FASGLIHRV		C1402	9	IFPDRATLY		C1403	9
C0102	9	KLPGNISSL		C0302	9	FVKGQFHEF		C0303	9	FATIKSASL		C0304	9	FASSPLRVL		C0701	9	QRPRESYQM		C0702	9	IYQELVTKY		C0704	9	MANGAVIHL		C0801	9	FGVIPSTPL		C0802	9	FAMEIDPSL		C1202	9	GAVGFFTHY		C1203	9	FASHVSPEV		C1402	9	IFPECPHVY		C1403	9
C0102	9	KLPGPGSSL		C0302	9	FVKGWGAEY		C0303	9	FATSTEPVL		C0304	9	FASTILHLV		C0701	9	QRPTIYYVM		C0702	9	IYYFKANVF		C0704	9	MANPTALLL		C0801	9	FGYDKDTSL		C0802	9	FAMFDQSQI		C1202	9	GAVGFVTHY		C1203	9	FASKLVLKA		C1402	9	IFPEFLKEL		C1403	9
C0102	9	KLPKVNKEL		C0302	9	FVKPAFEEF		C0303	9	FATTNQISL		C0304	9	FASTMVHAL		C0701	9	QRQDIAFAY		C0702	9	KAFARPWSL		C0704	9	MAPLKMLAL		C0801	9	FGYDKPHVL		C0802	9	FASEVSNVL		C1202	9	GAYGQAVRY		C1203	9	FASPKIDSV		C1402	9	IFPEGFVEL		C1403	9
C0102	9	KLPTPMQSL		C0302	9	FVNDYILYY		C0303	9	FATTSPLVL		C0304	9	FATDAILAT		C0701	9	QRSRFIVVV		C0702	9	KAPGSTSNL		C0704	9	MLAKHVITL		C0801	9	FIADHCPTL		C0802	9	FASFPHMVL		C1202	9	GIIRPGTAF		C1203	9	FASPMKSVV		C1402	9	IFPLIYSEM		C1403	9
C0102	9	KLQASVRCL		C0302	9	FVNPGVVEF		C0303	9	FAVALPQLL		C0304	9	FATDSGLEF		C0701	9	QRVDYIMQL		C0702	9	KKADCTITM		C0704	9	MQNPNAIIL		C0801	9	FIAPTGHSL		C0802	9	FASHVSPEV		C1202	9	GVGVGAAAV		C1203	9	FASPTQVFF		C1402	9	IFPNQTEEL		C1403	9
C0102	9	KSPAITATL		C0302	9	FVNPHVSSF		C0303	9	FAVATPEEL		C0304	9	FATEGLRTL		C0701	9	QRVSCAHIY		C0702	9	KKIPGIYVL		C0704	9	MQSGPKPLF		C0801	9	FICNIFDYL		C0802	9	FAYVEGESL		C1202	9	GVKKPTKAL		C1203	9	FASQVEQLI		C1402	9	IFPPSGMEY		C1403	9
C0102	9	KSPEIQRAL		C0302	9	FVNPSLRVL		C0303	9	FAVDREARL		C0304	9	FATEVRAVI		C0701	9	QRYHQPHTL		C0702	9	KKNPFHLEL		C0704	9	MRNKNIVHM		C0801	9	FICPITREL		C0802	9	FDDEANHLL		C1202	9	HAAAPTSTL		C1203	9	FASTILHLV		C1402	9	IFPSSISAM		C1403	9
C0102	9	KSPGFGLSL		C0302	9	FVNPTSFVY		C0303	9	FAVEYFTRL		C0304	9	FATFPSSAF		C0701	9	QTNDVLLTF		C0702	9	KKSDPVVSY		C0704	9	MSSSVVVRL		C0801	9	FIDDANYSV		C0802	9	FFDEESYSL		C1202	9	HAAGFAYTY		C1203	9	FASVFEKYF		C1402	9	IFPTLTSPL		C1403	9
C0102	9	KSPGTANVL		C0302	9	FVNPVQVVL		C0303	9	FAVGPGHGI		C0304	9	FATGVWHQM		C0701	9	RAADVLVYL		C0702	9	KKTEVVITL		C0704	9	NAHGKIIIL		C0801	9	FIDGHFVEM		C0802	9	FFDEKLNSL		C1202	9	HAAHIISEL		C1203	9	FASVLIRRI		C1402	9	IFQDPRSWF		C1403	9
C0102	9	KSPIAPCSL		C0302	9	FVRDMIREV		C0303	9	FAVGSFHTL		C0304	9	FATIKSASL		C0701	9	RAAPFSLEY		C0702	9	KRADLQSTF		C0704	9	NAHNLALVF		C0801	9	FIEDAVHVL		C0802	9	FFDNISSEL		C1202	9	HAAPPAHPL		C1203	9	FASYATIIL		C1402	9	IFQGNVHNF		C1403	9
C0102	9	KSPITRSEM		C0302	9	FVRDYMAVL		C0303	9	FAVGVQQVL		C0304	9	FATIRTASL		C0701	9	RAAPHRISL		C0702	9	KRCDIILVM		C0704	9	NAIGVLIYM		C0801	9	FIESAHTEL		C0802	9	FFDTNTSVL		C1202	9	HACGVIATI		C1203	9	FASYMEQHL		C1402	9	IFQIGVLGF		C1403	9
C0102	9	KSPVNTKSL		C0302	9	FVSPSLAVH		C0303	9	FAVIAHVGM		C0304	9	FATMVRPVA		C0701	9	RAQTVVVEY		C0702	9	KRFGKAYNL		C0704	9	NATPDSHIM		C0801	9	FIFSDTHEL		C0802	9	FGDDIPSAL		C1202	9	HAFVTEVAY		C1203	9	FATEGLRTL		C1402	9	IFQIHTSRM		C1403	9
C0102	9	KTAENFRAL		C0302	9	FVSSFMSEL		C0303	9	FAVISRHSL		C0304	9	FATSTEPVL		C0701	9	RASQFTIVL		C0702	9	KRFSGTVRL		C0704	9	NAYTGIVLL		C0801	9	FIHQHFVEV		C0802	9	FGDDWGSIL		C1202	9	HAFWGGSVV		C1203	9	FATLRWIDY		C1402	9	IFQNIKQEY		C1403	9
C0102	9	KTPFVARSL		C0302	9	FVVDRLIAL		C0303	9	FAVLEDHTL		C0304	9	FATTSPLVL		C0701	9	RGCDILIVY		C0702	9	KRGDVIYIL		C0704	9	NGHEFVFLL		C0801	9	FIIDDKGIL		C0802	9	FGDFSPTDV		C1202	9	HAHLSQTTL		C1203	9	FATPFLVVR		C1402	9	IFQPHVRHL		C1403	9
C0102	9	KTPGPVRGL		C0302	9	FVVPYGTPL		C0303	9	FAVNKWHNL		C0304	9	FAVALPQLL		C0701	9	RGSDVIIML		C0702	9	KRHCFDVNY		C0704	9	NLPAHTVII		C0801	9	FIISDFESV		C0802	9	FGDLGSAKL		C1202	9	HAIPPTLAM		C1203	9	FAVAIYAVY		C1402	9	IFQTAKETL		C1403	9
C0102	9	KTPQGLSNL		C0302	9	FVYENPISL		C0303	9	FAVNMFRTL		C0304	9	FAVDREARL		C0701	9	RGVEFVHVY		C0702	9	KRIDIIHNL		C0704	9	NLPPHIIRL		C0801	9	FIISRTQAL		C0802	9	FGDLHQTEL		C1202	9	HAKPPTPSL		C1203	9	FAVALPQLL		C1402	9	IFQTGLVAY		C1403	9
C0102	9	KVFSTKSSL		C0302	9	FVYGESVEL		C0303	9	FAVPENSSV		C0304	9	FAVEEGDHL		C0701	9	RIAEFAFEY		C0702	9	KRINWRTVL		C0704	9	NRGVIITML		C0801	9	FIIYDTHSL		C0802	9	FGDLTIKSL		C1202	9	HAKTNISSY		C1203	9	FAVGICNKI		C1402	9	IFSIREVSF		C1403	9
C0102	9	KVPAGVQEL		C0302	9	FVYITDNAY		C0303	9	FAVPESDHL		C0304	9	FAVEYFTRL		C0701	9	RILDQPYSL		C0702	9	KRLDVEFVL		C0704	9	NRHPNFLVV		C0801	9	FISHLFMQL		C0802	9	FGDSACFTL		C1202	9	HAMEKMEEF		C1203	9	FAVGVEKNW		C1402	9	IFVVASSSY		C1403	9
C0102	9	KVPFIINTL		C0302	9	FVYKGGKIY		C0303	9	FAVPKNYKL		C0304	9	FAVGPGHGI		C0701	9	RILFHGVFY		C0702	9	KRNDYVHAL		C0704	9	NRSNTVVIM		C0801	9	FIVEETLPL		C0802	9	FGDTGGFHF		C1202	9	HAMQFPAEL		C1203	9	FAVNKKIEF		C1402	9	IFYDRAEYL		C1403	9
C0102	9	KVPKERLAL		C0302	9	FVYLRQPYY		C0303	9	FAVSDGLEL		C0304	9	FAVGSFHTL		C0701	9	RILVHEWPM		C0702	9	KRPAGPLVL		C0704	9	NSHEMAIVF		C0801	9	FIVSDESIL		C0802	9	FGEIEAIEL		C1202	9	HANDQTVIF		C1203	9	FAVNMFRTL		C1402	9	IWPEKVLDI		C1403	9
C0102	9	KVPTTKSTL		C0302	9	FVYPFGATL		C0303	9	FAVTLETVL		C0304	9	FAVGVQQVL		C0701	9	RIPSFVTEL		C0702	9	KRPDTTESL		C0704	9	NSTPAVFTM		C0801	9	FLAHIYTEL		C0802	9	FGEIENIEL		C1202	9	HANLTEVTF		C1203	9	FAVSRLIYW		C1402	9	IWPLYLRFL		C1403	9
C0102	9	KVQAGNSSL		C0302	9	GAAGVHFIY		C0303	9	FAVVPSTAT		C0304	9	FAVIAHVGM		C0701	9	RISDVHFSV		C0702	9	KRPVFIFEW		C0704	9	NVADLVVIL		C0801	9	FLCPFHLSV		C0802	9	FGEVESIEL		C1202	9	HARGNLASY		C1203	9	FAVSVPLRV		C1402	9	IWVDYINFL		C1403	9
C0102	9	KVTELRSEL		C0302	9	GALDLLKEL		C0303	9	FAVYIHALL		C0304	9	FAVISRHSL		C0701	9	RIYPHGLVL		C0702	9	KRPVGGFLL		C0704	9	NVSNVNLTL		C0801	9	FLDDNQIIT		C0802	9	FIADHCPTL		C1202	9	HAVEISAVH		C1203	9	FAVYIHALL		C1402	9	IYADYARSL		C1403	9
C0102	9	KWQERKEAL		C0302	9	GAMDLLREL		C0303	9	FAWPQPASL		C0304	9	FAVLEDHTL		C0701	9	RKNPFVYKV		C0702	9	KRQEAIFEL		C0704	9	NVTWVIVNL		C0801	9	FLDDNQIVT		C0802	9	FIDDANYSV		C1202	9	HAVEWPVVM		C1203	9	FAWPKILKI		C1402	9	IYAVNGIAF		C1403	9
C0102	9	LAPASLTSA		C0302	9	GAMGIMLVY		C0303	9	FAYEDIKTL		C0304	9	FAVLPRLLL		C0701	9	RKPKYIHNL		C0702	9	KRQEVIYEL		C0704	9	PDLPRNAQV		C0801	9	FLDDVNLIL		C0802	9	FIDDVVSAV		C1202	9	HAWSGGLDH		C1203	9	FAYEGPMYL		C1402	9	IYELMQTEF		C1403	9
C0102	9	LAPASVQTL		C0302	9	GAVDPLLAL		C0303	9	FAYEGPMYL		C0304	9	FAVNMFRTL		C0701	9	RLNDYIFSF		C0702	9	KRVEDAYIL		C0704	9	QAIENAHVL		C0801	9	FLDEKTHEL		C0802	9	FIDEAGHCM		C1202	9	HAYPYPQMY		C1203	9	FAYEQCLLV		C1402	9	IYFDSSATY		C1403	9
C0102	9	LAPATVQTV		C0302	9	GAVPIFIEL		C0303	9	FAYGLLMEL		C0304	9	FAVPENSSV		C0701	9	RLPAWQPIL		C0702	9	KRVFPKWTY		C0704	9	QDLERVRNL		C0801	9	FLDGNELTL		C0802	9	FIDEQNYIL		C1202	9	HGIDPTGTY		C1203	9	FAYGLLMEL		C1402	9	IYFEYSHAF		C1403	9
C0102	9	LAPCFQKAL		C0302	9	GGLFGTSSF		C0303	9	FAYLRDLLI		C0304	9	FAVPESDHL		C0701	9	RLPDVQLWL		C0702	9	KRVTWIVEF		C0704	9	QDVARVLGF		C0801	9	FLDGNEMTL		C0802	9	FIDEYVETV		C1202	9	HIASFLSVF		C1203	9	FAYHMIETY		C1402	9	IYFTRIIAF		C1403	9
C0102	9	LAPNIISQL		C0302	9	GIYPHKLVF		C0303	9	FAYMPNNSL		C0304	9	FAVPKNYKL		C0701	9	RLPEHCIEY		C0702	9	KRYIFADAY		C0704	9	QDVKKIEKF		C0801	9	FLDSTSPLL		C0802	9	FIDGGGSVL		C1202	9	HIIEDPCTL		C1203	9	FAYHYPYTY		C1402	9	IYHNGVLEF		C1403	9
C0102	9	LAPNQTKEL		C0302	9	GLAEFLQSF		C0303	9	FAYPAIRYL		C0304	9	FAVSDGLEL		C0701	9	RLPEIYIQL		C0702	9	KRYKSIVKY		C0704	9	QIPEIKQTL		C0801	9	FLFSKFIEL		C0802	9	FIDGHFVEM		C1202	9	HIITGVAVF		C1203	9	FAYLRDLLI		C1402	9	IYIDGVQEV		C1403	9
C0102	9	LAPPAGATL		C0302	9	GVFQFKVDY		C0303	9	FAYRGFKYL		C0304	9	FAVTLETVL		C0701	9	RNFHVFLEY		C0702	9	KYAGSALQY		C0704	9	QKPNFVIIL		C0801	9	FLIRESETL		C0802	9	FIDGNVESL		C1202	9	HIMEIFSTY		C1203	9	FAYMPNNSL		C1402	9	IYIDRGVVF		C1403	9
C0102	9	LAPPAGSVL		C0302	9	GVYLFTEAY		C0303	9	FAYTARISV		C0304	9	FAVVPSTAT		C0701	9	RNFVEETVY		C0702	9	KYFAKHPRL		C0704	9	QRPTIYYVM		C0801	9	FLPDHPIVL		C0802	9	FIDTAQHML		C1202	9	HINLMEVSY		C1203	9	FAYPAIRYL		C1402	9	IYIINVHSM		C1403	9
C0102	9	LAPSASVVL		C0302	9	HAAGFFIAF		C0303	9	FAYTSRHEI		C0304	9	FAVYIHALL		C0701	9	RNHPYPYLM		C0702	9	KYFDEHYEY		C0704	9	QRQPVYIIM		C0801	9	FLVPTFEQL		C0802	9	FIDVGAGVI		C1202	9	HINSIKSVF		C1203	9	FAYPAPLEV		C1402	9	IYLDSVMCL		C1403	9
C0102	9	LAPSGDLSL		C0302	9	HAASVFLTL		C0303	9	FAYVEGESL		C0304	9	FAWPQPASL		C0701	9	RNKEIVHTF		C0702	9	KYFEKQFEL		C0704	9	QRSRFIVVV		C0801	9	FLYPFPLAL		C0802	9	FIESAHTEL		C1202	9	HIYDKTSVL		C1203	9	FAYPIPHTT		C1402	9	IYLEGKIDY		C1403	9
C0102	9	LAPSGFLGL		C0302	9	HADDSFLVL		C0303	9	FCIEVGKNL		C0304	9	FAYEGPMYL		C0701	9	RNKNIVHML		C0702	9	KYFGGVLEY		C0704	9	RAAIHVVVL		C0801	9	FMSLLEDTL		C0802	9	FIGDSGIPL		C1202	9	HLKDLIAVH		C1203	9	FAYPSELKA		C1402	9	IYLIGHVAA		C1403	9
C0102	9	LAPTREIAV		C0302	9	HAFVTEVAY		C0303	9	FFMPGFAPL		C0304	9	FAYLRDLLI		C0701	9	RNLDAQYEM		C0702	9	KYFLQQWEL		C0704	9	RAAPHRISL		C0801	9	FNDSTRLIL		C0802	9	FLDASGAKL		C1202	9	HSAGVGAIF		C1203	9	FAYSMVIVP		C1402	9	IYLIKGSAL		C1403	9
C0102	9	LAPVRQQEL		C0302	9	HAIPPTLAM		C0303	9	FGCPNPRQL		C0304	9	FAYMPNNSL		C0701	9	RNLDKAFSY		C0702	9	KYFLRGYRY		C0704	9	RAFDHVLHL		C0801	9	FQCQTKLEL		C0802	9	FLDDLGTNL		C1202	9	HSPGAVSSL		C1203	9	FAYSSRIAI		C1402	9	IYLNHIEPL		C1403	9
C0102	9	LFEDATSAL		C0302	9	HAPFTATSL		C0303	9	FGDVTAHLL		C0304	9	FAYNFREEL		C0701	9	RNLFHRQGF		C0702	9	KYGNQLVRL		C0704	9	RAHPQGLVL		C0801	9	FQDHTKLIL		C0802	9	FLDDLSQKL		C1202	9	HTADISSHF		C1203	9	FAYTAKLIL		C1402	9	IYLPAAQTM		C1403	9
C0102	9	LFENRLSSL		C0302	9	HAYDNFLEH		C0303	9	FGEMGGKFM		C0304	9	FAYPAIRYL		C0701	9	RNLHVVFTM		C0702	9	KYHGFGNVH		C0704	9	RALDHYLTL		C0801	9	FQDPVPLTV		C0802	9	FLDDNQIVT		C1202	9	HTAMPGSVF		C1203	9	FAYTARISV		C1402	9	IYMDSGMSL		C1403	9
C0102	9	LFEPVINAL		C0302	9	HAYIHSVQF		C0303	9	FGGPEVLKL		C0304	9	FAYPAPLEV		C0701	9	RNLLHDNEL		C0702	9	KYIGYARQY		C0704	9	RAMDQKIIL		C0801	9	FQEADSPTL		C0802	9	FLDDVNLIL		C1202	9	HTFLPKIFF		C1203	9	FAYTRLQLL		C1402	9	IYMDTLNIF		C1403	9
C0102	9	LFKEREKPL		C0302	9	HLRDYFEEY		C0303	9	FGHYQQAEL		C0304	9	FAYRGFKYL		C0701	9	RNLPTIFVY		C0702	9	KYKDAIHFY		C0704	9	RANTFVAEL		C0801	9	FQVNHTVAL		C0802	9	FLDDVVHSL		C1202	9	HTKLSLGSY		C1203	9	FAYTSRHEI		C1402	9	IYMGHVKGY		C1403	9
C0102	9	LFMPRSTEF		C0302	9	HLRDYFEQY		C0303	9	FGIDPIWSL		C0304	9	FAYTARISV		C0701	9	RNLYLIMEF		C0702	9	KYKDIYTEL		C0704	9	RASQFTIVL		C0801	9	FRVPTANVS		C0802	9	FLDEDDMSL		C1202	9	HVRDCVQTY		C1203	9	FAYTSRIVV		C1402	9	IYMQKVIYY		C1403	9
C0102	9	LGPAALHAL		C0302	9	HQDISLLYT		C0303	9	FGIDRPAEL		C0304	9	FAYTRLQLL		C0701	9	RNNSVVQVL		C0702	9	KYKDNPFSL		C0704	9	RDAFRTLGL		C0801	9	FSCGVISTL		C0802	9	FLDEKTHEL		C1202	9	IAADILIKE		C1203	9	FAYTVKYVL		C1402	9	IYPDSFTVL		C1403	9
C0102	9	LGPPAAHSL		C0302	9	HSFYNGLSF		C0303	9	FGINHGIEL		C0304	9	FAYTVKYVL		C0701	9	RNRILEIVY		C0702	9	KYKERGTVL		C0704	9	RDALVHARL		C0801	9	FSDDSDLQL		C0802	9	FLDENVHFF		C1202	9	IAAGIFNDL		C1203	9	FAYVQERRF		C1402	9	IYPEAVTMF		C1403	9
C0102	9	LGPPGTSAL		C0302	9	HSHLLKTPL		C0303	9	FGINKVSKL		C0304	9	FAYVEGESL		C0701	9	RNTFHVISF		C0702	9	KYMDVQFDF		C0704	9	RDEIRPLSF		C0801	9	FSDLTMHEL		C0802	9	FLDEPTNHL		C1202	9	IAAPFTSKL		C1203	9	FAYYKLNDL		C1402	9	IYPETAAIL		C1403	9
C0102	9	LIPAVGSSL		C0302	9	HSRLFDQAF		C0303	9	FGIPVLMAL		C0304	9	FCEKSFRQL		C0701	9	RNVARCWTY		C0702	9	KYNACILEY		C0704	9	RDHAVVVGV		C0801	9	FSDPESQTL		C0802	9	FLDGDQLTL		C1202	9	IAAPTSSAL		C1203	9	FAYYRDLVF		C1402	9	IYPEVVHMF		C1403	9
C0102	9	LIPKDYRSL		C0302	9	IAAPNMKAM		C0303	9	FGKAAGPSL		C0304	9	FCIEVGKNL		C0701	9	RNYFKKEEL		C0702	9	KYPDVIQEL		C0704	9	RDLERGVEI		C0801	9	FSDPIHPQL		C0802	9	FLDGNELTL		C1202	9	IAAVPATAM		C1203	9	FAYYRVGEY		C1402	9	IYPPEVAEF		C1403	9
C0102	9	LLLERAKEL		C0302	9	IAAVPATAM		C0303	9	FGLARAFSL		C0304	9	FCIQVGRTM		C0701	9	RNYLHYSLY		C0702	9	KYPEGIRKY		C0704	9	RDNLKISDF		C0801	9	FSEETPVVL		C0802	9	FLDGNEMTL		C1202	9	IAFDPRSAY		C1203	9	FFAGLVPRL		C1402	9	IYPVNAISF		C1403	9
C0102	9	LLLTRPVWL		C0302	9	IAFDPRSAY		C0303	9	FGLPRWVTL		C0304	9	FCMDRALEF		C0701	9	RNYYHESAF		C0702	9	KYPENFFLL		C0704	9	RDSERLLEV		C0801	9	FSEPFHLIV		C0802	9	FLDGRPLTL		C1202	9	IAFGFHQLY		C1203	9	FFALPFSSM		C1402	9	IYPYAAISY		C1403	9
C0102	9	LLNSATTSL		C0302	9	IAFHFRVYF		C0303	9	FGMIVSSAL		C0304	9	FGDIFLHLL		C0701	9	RQADFVQVL		C0702	9	KYPHYFPVM		C0704	9	RDVQHIIVF		C0801	9	FSFDGPEIM		C0802	9	FLDGYVSQL		C1202	9	IAFPKAEEL		C1203	9	FFFTARTSF		C1402	9	IYQEKVLDL		C1403	9
C0102	9	LLPDEVSTL		C0302	9	IAHGFFSVY		C0303	9	FGMQARYSL		C0304	9	FGDVTAHLL		C0701	9	RQFPTAFEF		C0702	9	KYPPVNRKY		C0704	9	RDVQKVVGF		C0801	9	FSFPEPEAL		C0802	9	FLDLTEQEF		C1202	9	IAFPTSISV		C1203	9	FFIAGRYEF		C1402	9	IYQIHKEYL		C1403	9
C0102	9	LLPEHFLFL		C0302	9	IAHLFNVEW		C0303	9	FGNGWIPTL		C0304	9	FGEMGGKFM		C0701	9	RQRSLFVVV		C0702	9	KYPSPFFVF		C0704	9	RDYEKAIKF		C0801	9	FSFYFHEAL		C0802	9	FLDMNFQSL		C1202	9	IAFSRPVKY		C1203	9	FFMEKRAKY		C1402	9	IYQQIIQTY		C1403	9
C0102	9	LLPGNARCL		C0302	9	IAHMYQVEF		C0303	9	FGNNKLTTF		C0304	9	FGFSHLEAL		C0701	9	RRAAEPVTF		C0702	9	KYPSYIHKM		C0704	9	REAPERPSL		C0801	9	FSHAQTVVL		C0802	9	FLDNLTEEL		C1202	9	IAHDTGTSL		C1203	9	FFPDFIWTV		C1402	9	IYQSKVREL		C1403	9
C0102	9	LLPHAVSSL		C0302	9	IAIDVIDAY		C0303	9	FGNPRGTFL		C0304	9	FGFSSGAFL		C0701	9	RRAEVELEY		C0702	9	KYQDVYVEL		C0704	9	REDVGKVKF		C0801	9	FSHGQVVSL		C0802	9	FLDPIMSTL		C1202	9	IAHGFFSVY		C1203	9	FFYQRLVEF		C1402	9	IYQSMPRML		C1403	9
C0102	9	LLPPPMKEL		C0302	9	IAIFKLPAF		C0303	9	FGNPRKPVL		C0304	9	FGGPEVLKL		C0701	9	RRAPAHPCL		C0702	9	KYREMYEEF		C0704	9	REEKRVLGL		C0801	9	FSHTQVIEL		C0802	9	FLDQHGHNL		C1202	9	IAIEPGAAL		C1203	9	FFYTHLINF		C1402	9	IYQYMEEIY		C1403	9
C0102	9	LLPSHASYL		C0302	9	IAIPFGTAL		C0303	9	FGVDPYNVL		C0304	9	FGHYQQAEL		C0701	9	RRAPEPRVI		C0702	9	KYRPVCIHL		C0704	9	REFPKFFTF		C0801	9	FSHYMEENL		C0802	9	FLDRPQQWL		C1202	9	IAIPVTVAF		C1203	9	FGAQSVRVL		C1402	9	IYQYVLNSM		C1403	9
C0102	9	LLPVITKEL		C0302	9	IAIPVTQEL		C0303	9	FGVIPSTPL		C0304	9	FGIDKSKSI		C0701	9	RRAPHLHTL		C0702	9	LKSDIYLEY		C0704	9	RELQKLSKF		C0801	9	FSIDSPDSL		C0802	9	FLDSEVSEL		C1202	9	IAISLAQRY		C1203	9	FGFHKPKMY		C1402	9	IYSFHTLSF		C1403	9
C0102	9	LMPQVLTTL		C0302	9	IAIPVTVAF		C0303	9	FGVPVVVAL		C0304	9	FGIDPIWSL		C0701	9	RRAPVVVRL		C0702	9	LKSPFAYCM		C0704	9	RELYHVISF		C0801	9	FSIEPWLKV		C0802	9	FLDSPAKAL		C1202	9	IAISRTPVL		C1203	9	FGIPFLLRI		C1402	9	IYVISAETF		C1403	9
C0102	9	LSPAPSKTL		C0302	9	IAISRTPVL		C0303	9	FGWSHLEAL		C0304	9	FGIDRPAEL		C0701	9	RRAQPLVTL		C0702	9	LRADLAEEY		C0704	9	REMLIRVNM		C0801	9	FSIGADTAL		C0802	9	FLDSQTATF		C1202	9	IAKAGIPVY		C1203	9	FGITFPLLL		C1402	9	IYVTGGYSY		C1403	9
C0102	9	LSPEARRSL		C0302	9	IAMPLHMIF		C0303	9	FGYDKPHVL		C0304	9	FGINHGIEL		C0701	9	RRATWLHQA		C0702	9	LRDHSVRVL		C0704	9	REPNVLICF		C0801	9	FSITPLSEL		C0802	9	FLDSVTAEV		C1202	9	IAKATIEVF		C1203	9	FGSEFSPEL		C1402	9	IYWDGPLAL		C1403	9
C0102	9	LSPEFFTSV		C0302	9	IANHQVLII		C0303	9	FGYDYPSVL		C0304	9	FGLARAFSL		C0701	9	RRDGQILVY		C0702	9	LRHDRPYTL		C0704	9	RESERQLRL		C0801	9	FSLDDVEVL		C0802	9	FLDTEEAEL		C1202	9	IAKDEIGEF		C1203	9	FGTFLVQEL		C1402	9	IYYFAAVAH		C1403	9
C0102	9	LSPENLQSL		C0302	9	IAPGVTHEL		C0303	9	FGYPDPTYL		C0304	9	FGLNIFHQL		C0701	9	RRDTNVLVY		C0702	9	LRHPVCVEL		C0704	9	RESPRPLQL		C0801	9	FSLDLVHTL		C0802	9	FLDVSGISL		C1202	9	IAKDVCTFL		C1203	9	FGVDRAILY		C1402	9	IYYFKANVF		C1403	9
C0102	9	LSPGSLTLS		C0302	9	IAQDFKTDL		C0303	9	FGYSDALEL		C0304	9	FGLPRWVTL		C0701	9	RRDYVFIEF		C0702	9	LRNHMAVAF		C0704	9	RGSDVIIML		C0801	9	FSLPHPEAL		C0802	9	FLEEANRVL		C1202	9	IAKELSKTY		C1203	9	FGVPLIVHV		C1402	9	IYYQSPLSL		C1403	9
C0102	9	LSPITKLSV		C0302	9	IAQPVRSFL		C0303	9	FIADHCPTL		C0304	9	FGMQARYSL		C0701	9	RRFDCNFDL		C0702	9	LRNKVIIEY		C0704	9	RIMEFTTTL		C0801	9	FSNVFEHYL		C0802	9	FLEEHGPAM		C1202	9	IAKENLDVF		C1203	9	FGYDKPHVL		C1402	9	KFIDKQLEL		C1403	9
C0102	9	LSPMSVNAV		C0302	9	IARFFTEYF		C0303	9	FIADPLCSL		C0304	9	FGNGWIPTL		C0701	9	RRFDTAFFL		C0702	9	LRNQSVFNF		C0704	9	RIPSFVTEL		C0801	9	FSQALQHAL		C0802	9	FLEKENTAL		C1202	9	IAKSGTKAF		C1203	9	FGYDYPSVL		C1402	9	KFIDTTSKF		C1403	9
C0102	9	LSPNTTSSL		C0302	9	IARLPSSTL		C0303	9	FIAEHYMFL		C0304	9	FGNNKLTTF		C0701	9	RRFFPYYVY		C0702	9	LRPAVGYEL		C0704	9	RLAEHIVSM		C0801	9	FSQVIPVSL		C0802	9	FMDDTSRSI		C1202	9	IAKSGTSEF		C1203	9	FGYEPTIYY		C1402	9	KFKEVGEAF		C1403	9
C0102	9	LSPQRKEAL		C0302	9	IASPALDTL		C0303	9	FIAPSGHGL		C0304	9	FGNPRKPVL		C0701	9	RRFKEPWFL		C0702	9	LRPGIHHSL		C0704	9	RLPAWQPIL		C0801	9	FSSDVTHEM		C0802	9	FMDESTQCF		C1202	9	IANENHSTL		C1203	9	FGYGLPMLV		C1402	9	KFLAAGTHL		C1403	9
C0102	9	LSPSSDLTL		C0302	9	IASPVIAAV		C0303	9	FIAPTGHSL		C0304	9	FGSDISPEI		C0701	9	RRFKWAIEL		C0702	9	LRPPERQAL		C0704	9	RQPPPRPFL		C0801	9	FSSSDFSDL		C0802	9	FNDDNAEKL		C1202	9	IANMPASTF		C1203	9	FGYPDPTYL		C1402	9	KFLASDVVF		C1403	9
C0102	9	LSPTPATAL		C0302	9	IASPVQPVL		C0303	9	FICDHPQIM		C0304	9	FGSEFSPEL		C0701	9	RRFLAARTL		C0702	9	LRPPIMIMM		C0704	9	RQRSLFVVV		C0801	9	FSVGADTAL		C0802	9	FNDGSSREL		C1202	9	IAPETRRSI		C1203	9	FGYPKRLIM		C1402	9	KFLPDAQAL		C1403	9
C0102	9	LSPTYELAL		C0302	9	IATEIILEI		C0303	9	FICPITREL		C0304	9	FGSQPGLYL		C0701	9	RRFMQTFVL		C0702	9	LRPPYQISM		C0704	9	RRGDFIHVM		C0801	9	FSYAFPKAV		C0802	9	FNDPNAKEM		C1202	9	IAPTGHSLK		C1203	9	FIADHCPTL		C1402	9	KFLVAVESM		C1403	9
C0102	9	LTNQPTLEL		C0302	9	IAVYHLQEL		C0303	9	FIDGGGSVL		C0304	9	FGVDPYNVL		C0701	9	RRFPLEQRL		C0702	9	LRPSTSRSL		C0704	9	RRIQFPIEM		C0801	9	FTAPATVSL		C0802	9	FPDDATSPL		C1202	9	IASAIVNEL		C1203	9	FIAPTGHSL		C1402	9	KFPAYERVL		C1403	9
C0102	9	LTPPVATEL		C0302	9	IAYDVTYSL		C0303	9	FIDGHFVEM		C0304	9	FGVFSGHTL		C0701	9	RRFPSPHYL		C0702	9	LRSDSYVEL		C0704	9	RRNDKIIVF		C0801	9	FTDDQLLVL		C0802	9	FQDFSHIFL		C1202	9	IASDIVSRF		C1203	9	FICDHPQIM		C1402	9	KFPDSVEEL		C1403	9
C0102	9	LVPFSIKPL		C0302	9	IAYIRDLAL		C0303	9	FIDTAQHML		C0304	9	FGVIPSTPL		C0701	9	RRFTEIYEF		C0702	9	LRSGVIVRL		C0704	9	RRQEAIYEM		C0801	9	FTEWLHEVL		C0802	9	FQDIAIEVL		C1202	9	IASPVIAAV		C1203	9	FIHNFVEVL		C1402	9	KFPEIVAPL		C1403	9
C0102	9	LVPKRDHAL		C0302	9	IAYTFARAF		C0303	9	FIEDAVHVL		C0304	9	FGVPVVVAL		C0701	9	RRFWNSIVM		C0702	9	LSPTPATAL		C0704	9	RSDPGHYSF		C0801	9	FTFIFCHEL		C0802	9	FQDKRNLYL		C1202	9	IASPVQPVL		C1203	9	FIIDDKGIL		C1402	9	KFPTSRLEM		C1403	9
C0102	9	MAAAAPVAA		C0302	9	IIAEPGRYY		C0303	9	FIEPNVRFW		C0304	9	FGWSHLEAL		C0701	9	RRGDALIEM		C0702	9	LYHEHIIKY		C0704	9	RSNPKIWNV		C0801	9	FTSAAFHEL		C0802	9	FQDLNQEVM		C1202	9	IAVGHIYFF		C1203	9	FIIPNVVKY		C1402	9	KFQAMDISL		C1403	9
C0102	9	MAPDISLTL		C0302	9	IIAPPERKY		C0303	9	FIFLPGNTL		C0304	9	FGYDYPSVL		C0701	9	RRGDFIHVM		C0702	9	LYHYYIMEL		C0704	9	RSPNHIVVL		C0801	9	FVADVRLIF		C0802	9	FQDLQVEAL		C1202	9	IAVGHIYYF		C1203	9	FIIPQIVKY		C1402	9	KFYATLVRY		C1403	9
C0102	9	MAPDKQLTL		C0302	9	IIEPSLRQL		C0303	9	FIFSDTHEL		C0304	9	FGYPDPTYL		C0701	9	RRGDIIEVL		C0702	9	LYPGIPVIF		C0704	9	RSPPPGMGL		C0801	9	FVAEGGPEL		C0802	9	FQDLSSSIL		C1202	9	IAVGIMSYY		C1203	9	FIIQGLRSV		C1402	9	KFYNAGLAY		C1403	9
C0102	9	MAPDSSMSM		C0302	9	IINDLLQSL		C0303	9	FIGDSGIPL		C0304	9	FIADHCPTL		C0701	9	RRGDLPFVV		C0702	9	LYPSIIQEF		C0704	9	RSQEYKIVL		C0801	9	FVAETHIVL		C0802	9	FQDPSVTQL		C1202	9	IAYEPQIGY		C1203	9	FILHFEPVL		C1402	9	KFYSVNVDY		C1403	9
C0102	9	MAPEQKTEL		C0302	9	IIYHLFDAF		C0303	9	FIIDGKGVL		C0304	9	FIAEHYMFL		C0701	9	RRGDTFYVV		C0702	9	LYQDTHQEY		C0704	9	RSSPLTVTM		C0801	9	FVALPGVAV		C0802	9	FQDPVPLTV		C1202	9	IAYSRPVYF		C1203	9	FINGDISSL		C1402	9	KFYYSKIEY		C1403	9
C0102	9	MAPGTVTVV		C0302	9	ILGPPGSVY		C0303	9	FIIISSQHL		C0304	9	FIAPSGHGL		C0701	9	RRGEFIQEI		C0702	9	LYRNCVYTY		C0704	9	RSTDTVFHM		C0801	9	FVAPPTAAV		C0802	9	FQDSKNSDL		C1202	9	IGAPVGISL		C1203	9	FINNINSVL		C1402	9	KYAVQLVEM		C1403	9
C0102	9	MAPHNPHTL		C0302	9	ILMDDLSPK		C0303	9	FIIKPGSGA		C0304	9	FIAPTGHSL		C0701	9	RRGEYVLTF		C0702	9	LYRPGSVAY		C0704	9	RVMEHFIKL		C0801	9	FVCDIRPEI		C0802	9	FQDTNARSL		C1202	9	IGKDVSTSY		C1203	9	FINPKPITY		C1402	9	KYFGRSLEL		C1403	9
C0102	9	MAPKAWTVL		C0302	9	ILYEFPRVF		C0303	9	FIIPSCIAI		C0304	9	FICDSSPML		C0701	9	RRGIFHIIL		C0702	9	LYSPQYISY		C0704	9	RVQSHILHL		C0801	9	FVCPTEIVA		C0802	9	FQEADSPTL		C1202	9	IGVEHVVVY		C1203	9	FINSRIITV		C1402	9	KYIDFTSDY		C1403	9
C0102	9	MAPLKMLAL		C0302	9	ILYIRNLPY		C0303	9	FIIQGLRSV		C0304	9	FIDGGGSVL		C0701	9	RRGILIRQL		C0702	9	LYWSHPRKF		C0704	9	RVTDAAFNF		C0801	9	FVDELRITL		C0802	9	FSAGEPRVL		C1202	9	IIAEPGRYY		C1203	9	FIQSIISTV		C1402	9	KYIEGVSDF		C1403	9
C0102	9	MAPPSASCL		C0302	9	ISEENFRVM		C0303	9	FIISRTQAL		C0304	9	FIDGHFVEM		C0701	9	RRGPGPLTL		C0702	9	MAPLKMLAL		C0704	9	RVVSHEVVL		C0801	9	FVDGSAIQV		C0802	9	FSDDNARAV		C1202	9	IIHDLAQVY		C1203	9	FIRPWCTSL		C1402	9	KYIHSANVL		C1403	9
C0102	9	MAPQNLSTF		C0302	9	ISSPVILQF		C0303	9	FIITPGGCL		C0304	9	FIDTAQHML		C0701	9	RRGPGWRPL		C0702	9	MKPLVVFVL		C0704	9	SAHGVKLVL		C0801	9	FVDPAQITM		C0802	9	FSDDNKITI		C1202	9	IIHDPGRGA		C1203	9	FITGLIRIM		C1402	9	KYLALRIAL		C1403	9
C0102	9	MAPRTGKSL		C0302	9	ISTPVIRTF		C0303	9	FIIYDTHSL		C0304	9	FIEDAVHVL		C0701	9	RRHMEFRKL		C0702	9	MRKEFTLEF		C0704	9	SAHLFEVEL		C0801	9	FVDQCKTVL		C0802	9	FSDDPNVTK		C1202	9	IIIDKEYYY		C1203	9	FIYHLPQEF		C1402	9	KYLAVRLAL		C1403	9
C0102	9	MAPSGSLAV		C0302	9	IVIDPKNPL		C0303	9	FILEHIMVI		C0304	9	FIEPNVRFW		C0701	9	RRHPACRVL		C0702	9	MRMATPLLM		C0704	9	SAHQDALIL		C0801	9	FVDRSLLTL		C0802	9	FSDDSDLQL		C1202	9	IIKVGGERF		C1203	9	FLADIVQKL		C1402	9	KYLTSNVAY		C1403	9
C0102	9	MAPSIMKSL		C0302	9	IVNGHTLLV		C0303	9	FILEHIMVV		C0304	9	FIFLPGNTL		C0701	9	RRHTDPVQL		C0702	9	MRNAVCIFY		C0704	9	SAHSHFISL		C0801	9	FVFDERYAL		C0802	9	FSDEIRHNL		C1202	9	IINGKISFF		C1203	9	FLANVSTVL		C1402	9	KYMNNITYY		C1403	9
C0102	9	MAPSKETEM		C0302	9	IYRWFNISF		C0303	9	FILEPRSFL		C0304	9	FIFSDTHEL		C0701	9	RRHWGGNVL		C0702	9	MRPDLELQF		C0704	9	SAIDRIFTL		C0801	9	FVFPGELLL		C0802	9	FSDENVRAI		C1202	9	IIRKPVTVH		C1203	9	FLAPLVTEY		C1402	9	KYMYFTVVM		C1403	9
C0102	9	MAPVASIWL		C0302	9	KAFDFPSSF		C0303	9	FILGHLRTL		C0304	9	FIGDSGIPL		C0701	9	RRIDFVLVY		C0702	9	MRPLDIVEL		C0704	9	SAIPHPLIM		C0801	9	FVHAQCLEL		C0802	9	FSDEQILTV		C1202	9	IISEPGSYY		C1203	9	FLAPWATIA		C1402	9	KYNIMLVRL		C1403	9
C0102	9	MAPYGPLAA		C0302	9	KAFPFHIIF		C0303	9	FIMDRAQAL		C0304	9	FIIDGKGVL		C0701	9	RRIEIAHSL		C0702	9	MRPNNLVHF		C0704	9	SAISEGTVL		C0801	9	FVHDLVLYL		C0802	9	FSDEWVACL		C1202	9	IISSVIQKF		C1203	9	FLCPFHLSV		C1402	9	KYPASSSVF		C1403	9
C0102	9	MFCEKAMEL		C0302	9	KAFPFYSSY		C0303	9	FIMSATPTM		C0304	9	FIIISSQHL		C0701	9	RRIQFPIEM		C0702	9	MRSLLRTPF		C0704	9	SALPFITYL		C0801	9	FVIDEAHCV		C0802	9	FSDFEARQL		C1202	9	IKADHVSTY		C1203	9	FLFDGSPTY		C1402	9	KYPDYEVTW		C1403	9
C0102	9	MGPAARPAL		C0302	9	KAFSFLSSF		C0303	9	FINGDISSL		C0304	9	FIIQGLRSV		C0701	9	RRKDGVFLY		C0702	9	MYHGAAFQL		C0704	9	SANNVYLVM		C0801	9	FVIDLQTRL		C0802	9	FSDFPQHDI		C1202	9	ILGPPGSVY		C1203	9	FLFDHLLTL		C1402	9	KYPNFDVEY		C1403	9
C0102	9	MGPAGAKNL		C0302	9	KAFSFPSSF		C0303	9	FIPATGHSL		C0304	9	FIISRTQAL		C0701	9	RRKDLVLKY		C0702	9	MYPAFAEEY		C0704	9	SAPASQASL		C0801	9	FVINEVCEM		C0802	9	FSDIPSPYL		C1202	9	IMKKIRESY		C1203	9	FLFDKVVIV		C1402	9	KYQAQDNFM		C1403	9
C0102	9	MIPLLLAAL		C0302	9	KAFTDFLAF		C0303	9	FIQAVRQTL		C0304	9	FIIYDTHSL		C0701	9	RRKEVVVYL		C0702	9	MYRDYPLEL		C0704	9	SAPSSDKPL		C0801	9	FVIPVVQAL		C0802	9	FSDLTEEML		C1202	9	IQAGIFQEF		C1203	9	FLFDRPMHV		C1402	9	KYQAVTATL		C1403	9
C0102	9	MIQNSRPSL		C0302	9	KAFVFSVAL		C0303	9	FIQQCIRQL		C0304	9	FILEHIMVI		C0701	9	RRLDIVRSL		C0702	9	MYRSYVEML		C0704	9	SAPVPASPL		C0801	9	FVMETFVHL		C0802	9	FSDLTMHEL		C1202	9	ISIGGLSSF		C1203	9	FLIPFVITV		C1402	9	KYQEVTNNL		C1403	9
C0102	9	MLIEQARAL		C0302	9	KAIELLQEF		C0303	9	FIRVSGSEL		C0304	9	FILEHIMVV		C0701	9	RRLDLVHTA		C0702	9	NKAAVVLCM		C0704	9	SASALAVAL		C0801	9	FVNDIFERI		C0802	9	FSDPESQTL		C1202	9	ISIGPGASF		C1203	9	FLKDLVASV		C1402	9	KYQIQQVDM		C1403	9
C0102	9	MLPEKLRPL		C0302	9	KAINPINTF		C0303	9	FISGHTSEL		C0304	9	FILEPRSFL		C0701	9	RRLNFVRLL		C0702	9	NKADVILKY		C0704	9	SATFAEIFL		C0801	9	FVYEDMEAL		C0802	9	FSDPNFLAH		C1202	9	ISKALVAYY		C1203	9	FLLPIVVRY		C1402	9	KYYFILSPY		C1403	9
C0102	9	MLPELKSTL		C0302	9	KAIYHLEAF		C0303	9	FISHLFMQL		C0304	9	FILGHLRTL		C0701	9	RRMDVFTEA		C0702	9	NKKGEIFEL		C0704	9	SATPVAVTA		C0801	9	FVYGESVEL		C0802	9	FSDPVYKEI		C1202	9	ISNLPAATF		C1203	9	FLNQPHMVL		C1402	9	LFAPYGTVM		C1403	9
C0102	9	MLPMKVRAL		C0302	9	KALEVFPEF		C0303	9	FISPTGHSL		C0304	9	FILQPIHNL		C0701	9	RRMEVYNEF		C0702	9	NKNPNIVNY		C0704	9	SATRVYIVL		C0801	9	GADPSTVEM		C0802	9	FSDRSSLTF		C1202	9	ISPEFEPVF		C1203	9	FLPDHPIVL		C1402	9	LFEGRRIEF		C1403	9
C0102	9	MMPDGTLGL		C0302	9	KANPALYVL		C0303	9	FITDHVNSL		C0304	9	FIMDESNVL		C0701	9	RRNDDIINF		C0702	9	NKTDVVLIL		C0704	9	SAVGHVFSL		C0801	9	GATAAAPVP		C0802	9	FSDSSGLTV		C1202	9	ISPSHIWIF		C1203	9	FLPPYTFQI		C1402	9	LFFDSKQSL		C1403	9
C0102	9	MSPDVKNSI		C0302	9	KARPFFNEF		C0303	9	FITESYQTL		C0304	9	FIMDRAQAL		C0701	9	RRNDKIIVF		C0702	9	NRAFVSMVY		C0704	9	SAVSHFFSL		C0801	9	GAVDPLLAL		C0802	9	FSDTGNFGF		C1202	9	ISRETGEPY		C1203	9	FLREWVESM		C1402	9	LFHEVVQAF		C1403	9
C0102	9	MSPIPAHSL		C0302	9	KIHLFSMAF		C0303	9	FITPTGHSL		C0304	9	FIMSATPTM		C0701	9	RRNPEPLRF		C0702	9	NRFNYPFEL		C0704	9	SDHIHIIAL		C0801	9	GAVEPICSV		C0802	9	FSDTKIISL		C1202	9	ISRWPLPEY		C1203	9	FLVEHVLTL		C1402	9	LFHNAVSAY		C1403	9
C0102	9	MSPKAQRPL		C0302	9	KINEAFIEM		C0303	9	FIVDARPAM		C0304	9	FINGDISSL		C0701	9	RRNPGVVIY		C0702	9	NRFPWPKVL		C0704	9	SDLERVTSL		C0801	9	GAVPIFIEL		C0802	9	FSDTLFSTL		C1202	9	ISSPVVTSL		C1203	9	FLYDNLIIF		C1402	9	LFHTIGVEF		C1403	9
C0102	9	MSPLSETEM		C0302	9	LAAARLAAA		C0303	9	FIVEETLPL		C0304	9	FIPATGHSL		C0701	9	RRNPYCRTL		C0702	9	NRGDFFMTL		C0704	9	SDLKRINGF		C0801	9	GPLVAMILA		C0802	9	FSDTLKTYF		C1202	9	ISTPVIRTF		C1203	9	FLYPFFGVL		C1402	9	LFIEHSVEV		C1403	9
C0102	9	MSPLSNNSL		C0302	9	LAAMLRGLA		C0303	9	FLADPVSNM		C0304	9	FIQAVRQTL		C0701	9	RRPEFQTLL		C0702	9	NRGEVVTSF		C0704	9	SDLMRMEKI		C0801	9	HAAASFETL		C0802	9	FSDVHTMDL		C1202	9	ITAPPGTAA		C1203	9	FLYPFPLAL		C1402	9	LFIFSVANM		C1403	9
C0102	9	MSPMAERSM		C0302	9	LAAPVISVL		C0303	9	FLAEAARSL		C0304	9	FISGHTSEL		C0701	9	RRPEPVQTL		C0702	9	NRGQFFTVY		C0704	9	SDLRHLRAV		C0801	9	HAAHIISEL		C0802	9	FSEAEQRCV		C1202	9	ITPEFISTF		C1203	9	FLYPWKKEF		C1402	9	LFIPRETTY		C1403	9
C0102	9	MSPPPAKKL		C0302	9	LADPVFRTL		C0303	9	FLAHIYTEL		C0304	9	FISHLFMQL		C0701	9	RRPIVACEL		C0702	9	NRHAVVMEL		C0704	9	SDLVRCLSV		C0801	9	HAASVFLTL		C0802	9	FSEASSLSL		C1202	9	IVAEPGAVL		C1203	9	FMKPGTLYV		C1402	9	LFIPRRAPF		C1403	9
C0102	9	MSPSGRLCL		C0302	9	LAFSRALEL		C0303	9	FLANVSTVL		C0304	9	FISNVKTAL		C0701	9	RRPLFALLL		C0702	9	NRHGLIRKY		C0704	9	SDSTHLVTL		C0801	9	HACALAASL		C0802	9	FSEDAGISL		C1202	9	IVIDPKNPL		C1203	9	FNFWRAPIA		C1402	9	LFLEKAMQL		C1403	9
C0102	9	MTPLRALAL		C0302	9	LAHAYFAQY		C0303	9	FLCPFHLSV		C0304	9	FISPTGHSL		C0701	9	RRPRIPREL		C0702	9	NRIHYNIFY		C0704	9	SDYELKYCF		C0801	9	HACGVIATI		C0802	9	FSEEHPVLL		C1202	9	IVKEMTEVF		C1203	9	FPYPFQVVY		C1402	9	LFLPTAAAY		C1403	9
C0102	9	MTPSAKQSL		C0302	9	LAHEFLQNF		C0303	9	FLCVVSKEL		C0304	9	FITESYQTL		C0701	9	RRPSFTRTW		C0702	9	NRKEFVNLY		C0704	9	SDYIRCIAV		C0801	9	HACPLLSTL		C0802	9	FSEEIGNHL		C1202	9	IVKERGTVY		C1203	9	FQAEIAQLM		C1402	9	LFMPRSTEF		C1403	9
C0102	9	MTPTRELAL		C0302	9	LAHLHLIEY		C0303	9	FLDEKTHEL		C0304	9	FITPTGHSL		C0701	9	RRPYVRVEL		C0702	9	NRLFHKTVY		C0704	9	SEFQRLLGF		C0801	9	HADDSFLVL		C0802	9	FSEETPVVL		C1202	9	IVKKPGNIY		C1203	9	FQAFLRTEF		C1402	9	LFMPSTSSM		C1403	9
C0102	9	MVADKFTEL		C0302	9	LAHSFVTSF		C0303	9	FLEGRHAEL		C0304	9	FIVAEGDSL		C0701	9	RRQEAIYEM		C0702	9	NRLGYTHLY		C0704	9	SEGPPLTSF		C0801	9	HADHSSLTL		C0802	9	FSETINTEL		C1202	9	IVPGNVKSL		C1203	9	FQIGKMRYV		C1402	9	LFMSSFQSY		C1403	9
C0102	9	MVADRFSEL		C0302	9	LAIEHVRFF		C0303	9	FLENHVRHL		C0304	9	FIVDARPAM		C0701	9	RRQELEQVL		C0702	9	NRLLEATSY		C0704	9	SELIRNVTL		C0801	9	HADPEPSVI		C0802	9	FSITPLSEL		C1202	9	IVYPGIAVF		C1203	9	FQIMNEIVY		C1402	9	LFPDTPLAL		C1403	9
C0102	9	NAAERRGPL		C0302	9	LAIPITNTY		C0303	9	FLFDHLLTL		C0304	9	FIVEETLPL		C0701	9	RRQNVAYEY		C0702	9	NRLLLPHAF		C0704	9	SELKHWATF		C0801	9	HADPTELAL		C0802	9	FSSDVTHEM		C1202	9	KAADIASKV		C1203	9	FQKPFQTLM		C1402	9	LFPDVVNCM		C1403	9
C0102	9	NAAIAKQAL		C0302	9	LAIPQLPSL		C0303	9	FLFPPAESL		C0304	9	FIVVNTQSL		C0701	9	RRQPQPWCL		C0702	9	NRLPLVVSF		C0704	9	SELVRHSSF		C0801	9	HAHTIKPAL		C0802	9	FSSEACREL		C1202	9	KAADIGVAM		C1203	9	FQNIRPLFI		C1402	9	LFPGKVHSL		C1403	9
C0102	9	NAIPVDTVL		C0302	9	LAIPVFLTL		C0303	9	FLFSKFIEL		C0304	9	FIYHLPQEF		C0701	9	RRSDDMFTF		C0702	9	NRLSFFFDF		C0704	9	SEYARPHVM		C0801	9	HAIEESVVL		C0802	9	FSSEVTAAL		C1202	9	KAAGFISVL		C1203	9	FQNPQTHVI		C1402	9	LFPGPSKPF		C1403	9
C0102	9	NAPAAISFL		C0302	9	LAIVPVNTL		C0303	9	FLHPHLLVL		C0304	9	FIYTSELEL		C0701	9	RRSPFLQVF		C0702	9	NRMTVEYVY		C0704	9	SGAPHAILL		C0801	9	HAIPPTLAM		C0802	9	FSSPGGLSL		C1202	9	KAAGPSLSH		C1203	9	FQSMLHPVM		C1402	9	LFQDKASEL		C1403	9
C0102	9	NAPEANRGL		C0302	9	LAKDFYVAF		C0303	9	FLIAKVKYL		C0304	9	FLADPVSNM		C0701	9	RRSSIPITV		C0702	9	NRNLVSPAY		C0704	9	SGDVSLLHL		C0801	9	HALDYADEL		C0802	9	FTDASFLTL		C1202	9	KAAHFFSTL		C1203	9	FQYESKVFY		C1402	9	LFQHICTAY		C1403	9
C0102	9	NAPEQACHL		C0302	9	LAKGWAPTF		C0303	9	FLIIPLHSL		C0304	9	FLAEAARSL		C0701	9	RRSSSWRIL		C0702	9	NRNSIPLQL		C0704	9	SGHTVVLTM		C0801	9	HAMVILLTL		C0802	9	FTDASSRSI		C1202	9	KAANAFHVY		C1203	9	FQYPDTRYL		C1402	9	LFYFSNEKY		C1403	9
C0102	9	NAPGYGPII		C0302	9	LAKNFFNEL		C0303	9	FLINFIHTL		C0304	9	FLANVSTVL		C0701	9	RRTDCAYVV		C0702	9	NRPADVYSY		C0704	9	SGPGPAAAL		C0801	9	HASDAYTAL		C0802	9	FTDDQLLVL		C1202	9	KAANPGCSL		C1203	9	FSAEFLKVF		C1402	9	LLPHYPNWF		C1403	9
C0102	9	NAPLFIRAV		C0302	9	LALAIAQEL		C0303	9	FLIPFVITV		C0304	9	FLDEKTHEL		C0701	9	RRVEKHWRL		C0702	9	NRPEFITEF		C0704	9	SGQAFELIL		C0801	9	HAVGPSTAM		C0802	9	FTDEESRVF		C1202	9	KAATVTGKL		C1203	9	FSAFLEKEY		C1402	9	LPINGNGKQ		C1403	9
C0102	9	NAPMTLEEF		C0302	9	LALAQLSIA		C0303	9	FLIPKFFEL		C0304	9	FLEEANRVL		C0701	9	RRVEVTRQL		C0702	9	NRPGLSYHY		C0704	9	SINDKIIEL		C0801	9	HAVGPSTSL		C0802	9	FTDEEVDEL		C1202	9	KACDYIQEL		C1203	9	FSALLIKCL		C1402	9	LSWNKTVEL		C1403	9
C0102	9	NAPPSFGTL		C0302	9	LALDHLHSL		C0303	9	FLIRESETL		C0304	9	FLEGRHAEL		C0701	9	RRWEEVQSY		C0702	9	NRPGTVSSL		C0704	9	SIPDFPMHL		C0801	9	HAVSDPSIL		C0802	9	FTDERIFML		C1202	9	KAFDFPSSF		C1203	9	FSATLPKLL		C1402	9	LTTKRFLEL		C1403	9
C0102	9	NAPSHPRAL		C0302	9	LALEPGVAY		C0303	9	FLLEKPFSV		C0304	9	FLENHVRHL		C0701	9	RRWEQALTF		C0702	9	NRPKALNAL		C0704	9	SISHYVIVM		C0801	9	HAYDGKDYI		C0802	9	FTDFDPHHF		C1202	9	KAFDRPSLF		C1203	9	FSAVMVRLM		C1402	9	LYAIRTQEY		C1403	9
C0102	9	NFQTAKESL		C0302	9	LALFPGVAL		C0303	9	FLLPLIIVL		C0304	9	FLFDHLLTL		C0701	9	RRWHLQHTL		C0702	9	NRPNDVYAY		C0704	9	SKPNHTLVL		C0801	9	HICMVFEVL		C0802	9	FTDFQGGTL		C1202	9	KAFDSPSVF		C1203	9	FSAYNYRTY		C1402	9	LYFENAMRF		C1403	9
C0102	9	NGPGTPRPL		C0302	9	LALLRPALP		C0303	9	FLLPVINEM		C0304	9	FLFDHQMVL		C0701	9	RRYCDPVVL		C0702	9	NRPNLYYEV		C0704	9	SLMSHAIEL		C0801	9	HICQLYHVL		C0802	9	FTDFTNVRM		C1202	9	KAFDYPSRF		C1203	9	FSEPFHLIV		C1402	9	LYFGGAAAV		C1403	9
C0102	9	NGPILNVLV		C0302	9	LALSPRLEY		C0303	9	FLLQHVQEL		C0304	9	FLFPPAESL		C0701	9	RRYEIAVNL		C0702	9	NRPPFGQGY		C0704	9	SLPHNIIEL		C0801	9	HIDPNFASL		C0802	9	FTDGGPRTL		C1202	9	KAFGSKSTL		C1203	9	FSFDGPEIM		C1402	9	LYFIAPTGH		C1403	9
C0102	9	NGPVSHSSL		C0302	9	LAMEPTPEL		C0303	9	FLMDAGSVL		C0304	9	FLFSKFIEL		C0701	9	RRYNDFVVF		C0702	9	NRPPSSTEL		C0704	9	SLSTVFVVL		C0801	9	HIIEDPCTL		C0802	9	FTDGITNKL		C1202	9	KAFIQKSHF		C1203	9	FSFDYIVKW		C1402	9	LYGPKYTFF		C1403	9
C0102	9	NIPAGKPSL		C0302	9	LAMKLLKEL		C0303	9	FLNQPHMVL		C0304	9	FLHPHLLVL		C0701	9	RRYPIARVF		C0702	9	NRPRNIMVY		C0704	9	SLTPVTLVL		C0801	9	HPYRLILTV		C0802	9	FTDIDIDTL		C1202	9	KAFNQSSTL		C1203	9	FSFFDLIRY		C1402	9	LYHFSSSEL		C1403	9
C0102	9	NIPDMLQSL		C0302	9	LAMRPLASL		C0303	9	FLPDHPIVL		C0304	9	FLIDNGVSL		C0701	9	RRYSTLREL		C0702	9	NRPTNSIVF		C0704	9	SNTYVMVVM		C0801	9	HSMLDINAL		C0802	9	FTDIGKVDF		C1202	9	KAFNWPSTL		C1203	9	FSFGYALVY		C1402	9	LYHGMALAL		C1403	9
C0102	9	NIPGEYRCL		C0302	9	LANGEVRIY		C0303	9	FLQDTRLAL		C0304	9	FLIIPLHSL		C0701	9	RSFFHQHYL		C0702	9	NRPVEVYQY		C0704	9	SRGDVKVIM		C0801	9	HSNTIVVSL		C0802	9	FTDISPEEL		C1202	9	KAFPFHIIF		C1203	9	FSFHFPVCV		C1402	9	LYHWSVESY		C1403	9
C0102	9	NIPTWLTEL		C0302	9	LANGSILVY		C0303	9	FLQEHNTTL		C0304	9	FLINFIHTL		C0701	9	RSFPSVREL		C0702	9	NRPVHAYKF		C0704	9	SRITTHFEL		C0801	9	HVDGHLYEL		C0802	9	FTDKANSGL		C1202	9	KAFPFYSSY		C1203	9	FSFHHVLSL		C1402	9	LYIHHAIDL		C1403	9
C0102	9	NLPEETNEL		C0302	9	LANIRSPVF		C0303	9	FLQQPRPLM		C0304	9	FLIPFVITV		C0701	9	RSGPEFTLL		C0702	9	NRRPSVYLP		C0704	9	SRMLHFLTA		C0801	9	HVDSTWLLL		C0802	9	FTDLGNKDL		C1202	9	KAFPYSSHL		C1203	9	FSFHVVKVY		C1402	9	LYIQRTKSM		C1403	9
C0102	9	NLPERSVPL		C0302	9	LANPHELSL		C0303	9	FLQTPLTEL		C0304	9	FLIPKFFEL		C0701	9	RSGPWNRGF		C0702	9	NRSNFPVVL		C0704	9	SRMVHAIKM		C0801	9	IAAGIFNDL		C0802	9	FTDQHNICL		C1202	9	KAFQHPSHL		C1203	9	FSFKKPFKL		C1402	9	LYLPATTPY		C1403	9
C0102	9	NLPKARAAL		C0302	9	LAQQYYLVY		C0303	9	FLSHIPITL		C0304	9	FLIRESETL		C0701	9	RSINQPVAF		C0702	9	NRTDTEYVL		C0704	9	SRPALPFIL		C0801	9	IAAGVCGAL		C0802	9	FTDRPDLSL		C1202	9	KAFQKIVVL		C1203	9	FSFPFQTYY		C1402	9	LYLPMAQSV		C1403	9
C0102	9	NLPSTGGSL		C0302	9	LAREFLAAM		C0303	9	FLSSSNLSL		C0304	9	FLLEGIRSL		C0701	9	RSLAYIHSF		C0702	9	NRTETVTSF		C0704	9	SRPNIILVM		C0801	9	IAAMPLISL		C0802	9	FTDSGLSTL		C1202	9	KAFSHGSSL		C1203	9	FSFPGELLM		C1402	9	LYLTSCVNY		C1403	9
C0102	9	NMPLTISSL		C0302	9	LARFNAHEF		C0303	9	FLVEHNLVL		C0304	9	FLLEHIRIL		C0701	9	RSLGVHLSF		C0702	9	NRTIVITSH		C0704	9	SRPSHYHVL		C0801	9	IAAPELETL		C0802	9	FTDSGRQSV		C1202	9	KAFSHSSTL		C1203	9	FSFPHKFEI		C1402	9	LYNIMKEGL		C1403	9
C0102	9	NRPGTVSSL		C0302	9	LARIIDSEY		C0303	9	FLVEHVLTL		C0304	9	FLLEKPFSV		C0701	9	RSLPFPTVL		C0702	9	NRVLHYWTM		C0704	9	SRQGCTITM		C0801	9	IAAPTSSAL		C0802	9	FTDSLISNL		C1202	9	KAFSQSSTL		C1203	9	FSFQRPLLV		C1402	9	LYPACLREM		C1403	9
C0102	9	NSPASLVGL		C0302	9	LARPASAAL		C0303	9	FLVHNVKEL		C0304	9	FLLPVINEM		C0701	9	RSLSTTNVF		C0702	9	NRYSHDFNF		C0704	9	SRSHAIFTI		C0801	9	IAAVTDIPL		C0802	9	FTDTDELQL		C1202	9	KAFSYPSKL		C1203	9	FSFSGVNRL		C1402	9	LYPAVSAVY		C1403	9
C0102	9	NSPEKACSL		C0302	9	LASPESLEL		C0303	9	FLYAGHIFL		C0304	9	FLLQHVQEL		C0701	9	RSMEAHNIL		C0702	9	NRYYSHVDY		C0704	9	SRSHSIFTV		C0801	9	IADDTRVVV		C0802	9	FTDTVGNIL		C1202	9	KAFTHYSTY		C1203	9	FSFVRVISL		C1402	9	LYPEYGAAF		C1403	9
C0102	9	NSPFQVTAL		C0302	9	LASPVSPEL		C0303	9	FLYPFFGVL		C0304	9	FLMPTSSEL		C0701	9	RSMGLPLQF		C0702	9	NSPLPGSEL		C0704	9	SSHELFITL		C0801	9	IADEAFYGL		C0802	9	FTDVAGPEL		C1202	9	KAFTKSSTL		C1203	9	FSGPPEPVL		C1402	9	LYQDFVRDY		C1403	9
C0102	9	NSPGTYQEL		C0302	9	LASYVHYVF		C0303	9	FLYPFPLAL		C0304	9	FLNPAQRAL		C0701	9	RSNFLVLCY		C0702	9	NVPVRDIPA		C0704	9	SSHNSSFEL		C0801	9	IADEGTYTL		C0802	9	FTDVIGHYI		C1202	9	KAFVYPSVF		C1203	9	FSHAQTVVL		C1402	9	LYQIQQVTM		C1403	9
C0102	9	NSPIRSSAF		C0302	9	LATAAALTY		C0303	9	FLYSGHLAL		C0304	9	FLNQPHMVL		C0701	9	RSPDFASSF		C0702	9	NYFGAQPHY		C0704	9	SSHTFVPIL		C0801	9	IADGLCLEV		C0802	9	FTDVNKIYL		C1202	9	KAHGSPRVY		C1203	9	FSIDRALNV		C1402	9	LYQPSAESL		C1403	9
C0102	9	NSPLPGSEL		C0302	9	LATDFIQSL		C0303	9	FMSDLMKAL		C0304	9	FLPEAPAEL		C0701	9	RSQEYKIVL		C0702	9	NYFHLAVAF		C0704	9	SSLLEKGLD		C0801	9	IADGLPVAV		C0802	9	FTDVPSIQI		C1202	9	KAIATTVTY		C1203	9	FSIEPWLKV		C1402	9	LYYIGGEVF		C1403	9
C0102	9	NSPLRENSF		C0302	9	LATGAAMVL		C0303	9	FNDPNAKEM		C0304	9	FLQDTRLAL		C0701	9	RSRPYPVCF		C0702	9	NYFLRLCSF		C0704	9	SSNPVYMEM		C0801	9	IADHYMQVL		C0802	9	FTDVVTTNL		C1202	9	KAIDFAASL		C1203	9	FSIPFAPHI		C1402	9	LYYNANRAF		C1403	9
C0102	9	NSPLVRRTL		C0302	9	LATRAIPEL		C0303	9	FNDPVAMVL		C0304	9	FLQEHNTTL		C0701	9	RSSTYVQVL		C0702	9	NYGVLLHEL		C0704	9	SSNVVQLIM		C0801	9	IADNVFLFL		C0802	9	FTDYDVIHL		C1202	9	KAIELLQEF		C1203	9	FSIPYIISY		C1402	9	LYYVGGEVY		C1403	9
C0102	9	NSPSCTREL		C0302	9	LATSHMLEL		C0303	9	FNYPGGVAM		C0304	9	FLQTPLTEL		C0701	9	RSVLHHFHF		C0702	9	NYHAQHYHL		C0704	9	SSSAFRPVM		C0801	9	IADPDQPVL		C0802	9	FTETPSPVL		C1202	9	KAINPINTF		C1203	9	FSKAKPSVL		C1402	9	MFCEKAMEL		C1403	9
C0102	9	NSPSFCTSL		C0302	9	LATWATKEL		C0303	9	FQAPTAKEM		C0304	9	FLVDPNLDL		C0701	9	RTADFVFMF		C0702	9	NYIEFTRIL		C0704	9	SSSPVNILL		C0801	9	IADPNIAKL		C0802	9	FTEWLHEVL		C1202	9	KAISGVHTV		C1203	9	FSKDIFSVI		C1402	9	MFFFSRLEY		C1403	9
C0102	9	NSPTNISSL		C0302	9	LAVDGLMEM		C0303	9	FQEADSPTL		C0304	9	FLVEHNLVL		C0701	9	RTADVIIMM		C0702	9	NYLPFIMEL		C0704	9	SSSPVSVVL		C0801	9	IADPRGNTL		C0802	9	FVDADNLIL		C1202	9	KAITFVTQY		C1203	9	FSMYKPITY		C1402	9	MFYIAAVEK		C1403	9
C0102	9	NTPEDVQAL		C0302	9	LAVENLPSL		C0303	9	FQFGVPQAL		C0304	9	FLVEHVLTL		C0701	9	RTAHVILRY		C0702	9	NYNEKIYEL		C0704	9	STPDHSFSL		C0801	9	IADPTLAEM		C0802	9	FVDCPGHDI		C1202	9	KAKDGTHVL		C1203	9	FSNDIPHVV		C1402	9	MTQIMFETF		C1403	9
C0102	9	NTPENLHEM		C0302	9	LAVEPGSNL		C0303	9	FQIAQYKCL		C0304	9	FLVTVIHTL		C0701	9	RTATYITEL		C0702	9	NYPAFMMEM		C0704	9	SVHEKIFTL		C0801	9	IADSNPMVV		C0802	9	FVDDQQTFF		C1202	9	KAKEIYMTF		C1203	9	FSNGHIKVL		C1402	9	MYIARQLSF		C1403	9
C0102	9	NTPVVKSAL		C0302	9	LAVPDMSSL		C0303	9	FQIQTSTSL		C0304	9	FLYAGHIFL		C0701	9	RTFLHTVCF		C0702	9	NYPGFLTIL		C0704	9	SVIGFRILL		C0801	9	IADSPSPAV		C0802	9	FVDDSGRYL		C1202	9	KAKKIIETM		C1203	9	FSNPNIQKI		C1402	9	MYPAFAEEY		C1403	9
C0102	9	NVPAAGSHL		C0302	9	LAVSVLREI		C0303	9	FQLEHIMDL		C0304	9	FLYDKALTF		C0701	9	RTFWHKISY		C0702	9	NYPGLSISL		C0704	9	SVIPHILKM		C0801	9	IADTNFDVL		C0802	9	FVDEFLTYL		C1202	9	KAKNLIEVM		C1203	9	FSNPYSIEY		C1402	9	MYPGIADRM		C1403	9
C0102	9	NVPDGTGAL		C0302	9	LAWVHATVY		C0303	9	FQNEVARQL		C0304	9	FLYDTHQNL		C0701	9	RTHPVATSF		C0702	9	NYRHVANTL		C0704	9	SVNPYIVKL		C0801	9	IAFPTSISV		C0802	9	FVDEGIKTL		C1202	9	KAKPVTTNL		C1203	9	FSQDHLVIY		C1402	9	MYQDKLASL		C1403	9
C0102	9	NVPEAASTL		C0302	9	LAWVSSQFY		C0303	9	FQNPFRSEL		C0304	9	FLYPFFGVL		C0701	9	RTIATALEY		C0702	9	NYRPDHCIY		C0704	9	SVPDTAFSL		C0801	9	IAGEFKEQL		C0802	9	FVDEGKATV		C1202	9	KAMEAASSL		C1203	9	FSSCLHQVL		C1402	9	MYSIMVHAL		C1403	9
C0102	9	PAPGPHPAL		C0302	9	LAYIAHPKL		C0303	9	FQNPSTVTL		C0304	9	FLYPFPLAL		C0701	9	RTIGFFYTL		C0702	9	NYSQQLQVY		C0704	9	SVVQHLIHL		C0801	9	IAHELGHSL		C0802	9	FVDEILTSL		C1202	9	KAMELIREL		C1203	9	FSSDLISIH		C1402	9	NFFPSGIDF		C1403	9
C0102	9	PAYHSSLMD		C0302	9	LAYIHLIEF		C0303	9	FQSSAVMAL		C0304	9	FLYSGHLAL		C0701	9	RTKASVHTL		C0702	9	NYYGKYIAL		C0704	9	SYKDSTLIM		C0801	9	IAHFLDRHL		C0802	9	FVDELRITL		C1202	9	KAMGIMNSF		C1203	9	FSSENVKVF		C1402	9	NFFTKATPL		C1403	9
C0102	9	PDDTEAALL		C0302	9	LAYLQRIAL		C0303	9	FQTEVGKQL		C0304	9	FMEETERSL		C0701	9	RTKDTPLSL		C0702	9	PIRLLAAAA		C0704	9	TAPQGNVDL		C0801	9	IAHLEITAL		C0802	9	FVDFEGISL		C1202	9	KAMYPGTFY		C1203	9	FSSFVFSTV		C1402	9	NFHGEWLEV		C1403	9
C0102	9	PMSESTLSI		C0302	9	LAYTLARVY		C0303	9	FQTHTTPVL		C0304	9	FMNPHLISV		C0701	9	RTLDCIHVL		C0702	9	PSIVHRKCF		C0704	9	TASPVAVSL		C0801	9	IAHNMQSTL		C0802	9	FVDGDHVIL		C1202	9	KAPGSTSNL		C1203	9	FSSGAIQVV		C1402	9	NFICPALEF		C1403	9
C0102	9	PRHSQSLTM		C0302	9	LGYYHKHAF		C0303	9	FQTIARNAL		C0304	9	FMSDLMKAL		C0701	9	RTNEGVIEF		C0702	9	QRAPGGLSY		C0704	9	TDAPHFYGL		C0801	9	IAIAPNGAL		C0802	9	FVDGDWSVL		C1202	9	KAPVTKVAA		C1203	9	FSSHILVVV		C1402	9	NFIEDVLGY		C1403	9
C0102	9	PSIVHRKCF		C0302	9	LIHGDFNEF		C0303	9	FQVNHTVAL		C0304	9	FMVEKGPTL		C0701	9	RTNNIELHY		C0702	9	QRNEVVVEL		C0704	9	TDFIKIEEF		C0801	9	IAIEDPFSV		C0802	9	FVDGSAIQV		C1202	9	KAQSVREVF		C1203	9	FSSHLINLL		C1402	9	NFIEKVEAL		C1403	9
C0102	9	QAPAAVVEL		C0302	9	LIIANTMAF		C0303	9	FQYDHEAFL		C0304	9	FNDPVAMVL		C0701	9	RTPAAVREL		C0702	9	QRPETAATL		C0704	9	TDLTRKEGL		C0801	9	IAIEDPYSV		C0802	9	FVDGVSTVA		C1202	9	KAQVALTEY		C1203	9	FSSPHLLEA		C1402	9	NFIPTGSAF		C1403	9
C0102	9	QAPDGMQSL		C0302	9	LIREYIVEY		C0303	9	FQYPDTRYL		C0304	9	FNYPGGVAM		C0701	9	RTPDGQYIY		C0702	9	QRPFFPILY		C0704	9	TDSPREVFF		C0801	9	IALDKDAPL		C0802	9	FVDIVKVLL		C1202	9	KASGIIHSY		C1203	9	FSSPHLQML		C1402	9	NFIRVLVSY		C1403	9
C0102	9	QAPSGRAPL		C0302	9	LIRPVSASF		C0303	9	FQYSKSPSL		C0304	9	FQAPTAKEM		C0701	9	RTPDTPFSL		C0702	9	QRPPTRETF		C0704	9	TELERKLTF		C0801	9	IALGEFSTL		C0802	9	FVDKYSISL		C1202	9	KASGTLREY		C1203	9	FSSPHLVQV		C1402	9	NFISGAGIL		C1403	9
C0102	9	QAPVAAHTV		C0302	9	LIRPWFPEF		C0303	9	FSAGEPRVL		C0304	9	FQDAVNKVL		C0701	9	RTPGNRIVY		C0702	9	QRPRESYQM		C0704	9	TGNPTVIKM		C0801	9	IAMDLILKM		C0802	9	FVDLEPTVI		C1202	9	KASNPRTTF		C1203	9	FSSSSHLII		C1402	9	NFITGVGIL		C1403	9
C0102	9	QFLPRTITL		C0302	9	LIYEHLQQY		C0303	9	FSAPPGSEL		C0304	9	FQEADSPTL		C0701	9	RTSNYIYNF		C0702	9	QRPTIYYVM		C0704	9	TIMEKSLVL		C0801	9	IAQDFKTDL		C0802	9	FVDLGILDV		C1202	9	KAVNPGRSL		C1203	9	FSTPLLLEA		C1402	9	NFLALAREL		C1403	9
C0102	9	QGPDGRLEL		C0302	9	LLHAFQATF		C0303	9	FSAPSGTGL		C0304	9	FQEPDIHFL		C0701	9	RTSPYRTVL		C0702	9	QRQDIAFAY		C0704	9	TISSNVASK		C0801	9	IAQGSYIAL		C0802	9	FVDLGSSEL		C1202	9	KAVSLFLCY		C1203	9	FSVCHILLL		C1402	9	NFLAQTEAL		C1403	9
C0102	9	QGPGGASEL		C0302	9	LLHVFSTEF		C0303	9	FSDDSDLQL		C0304	9	FQFGVPQAL		C0701	9	RTYDLYITY		C0702	9	QRQEVCQSY		C0704	9	TLPWHSLIL		C0801	9	IASAIVNEL		C0802	9	FVDLSGHNL		C1202	9	KAYGASKTF		C1203	9	FSYAFPKAV		C1402	9	NFLGAENAF		C1403	9
C0102	9	QGPPVTPVL		C0302	9	LLNGQRLEL		C0303	9	FSDFEARQL		C0304	9	FQIQTSTSL		C0701	9	RVAIHGWSY		C0702	9	QRRPAGISY		C0704	9	TNSPTVIVM		C0801	9	IASPVIAAV		C0802	9	FVDPAQITM		C1202	9	KAYPFPLSH		C1203	9	FSYAFPKEF		C1402	9	NFLLHVTAL		C1403	9
C0102	9	QIAVGFLEL		C0302	9	LLRAPGAEL		C0303	9	FSDLTMHEL		C0304	9	FQLEHIMDL		C0701	9	RVAMYVHAY		C0702	9	QRVDYIMQL		C0704	9	TRHPENWTL		C0801	9	IASPVQPVL		C0802	9	FVDPVLNQL		C1202	9	KIIDGLLVM		C1203	9	FSYGTKILY		C1402	9	NFLNMSRSM		C1403	9
C0102	9	QIPEIKQTL		C0302	9	LLRTPGASL		C0303	9	FSDPFLKYL		C0304	9	FQMESQKFL		C0701	9	RVIDYILDL		C0702	9	QRVSCAHIY		C0704	9	TRPEKALIL		C0801	9	IATDDITEL		C0802	9	FVDQCKTVL		C1202	9	KIKNGTPPM		C1203	9	FTADFVRQL		C1402	9	NFLPEALDF		C1403	9
C0102	9	QIPVDLSEL		C0302	9	LLYIFKQPF		C0303	9	FSDPIHPQL		C0304	9	FQMQTTYVL		C0701	9	RVKPAVFDL		C0702	9	QYFARMCSL		C0704	9	TSAAHQVVL		C0801	9	IATELLKLN		C0802	9	FVDRGFYSV		C1202	9	KIKPVSLTF		C1203	9	FTADVRSVL		C1402	9	NFLSTLTSF		C1403	9
C0102	9	QLIPKRSAL		C0302	9	LQFPVGRVH		C0303	9	FSDPVYKEI		C0304	9	FQNPFRSEL		C0701	9	RVKPNIFSY		C0702	9	QYNPLPIEY		C0704	9	TSHPYRLIL		C0801	9	IAVEAQEIL		C0802	9	FVDRSLLTL		C1202	9	KIKTIGSTY		C1203	9	FTANQVKIY		C1402	9	NFMLHLVSM		C1403	9
C0102	9	QLPEGASAV		C0302	9	LSFPTTKTY		C0303	9	FSEDGYRTV		C0304	9	FQNPSTVTL		C0701	9	RVKTVTFEY		C0702	9	QYNTYPIKL		C0704	9	TSIGHVVQL		C0801	9	IAYLIVKEL		C0802	9	FVDTQDRSL		C1202	9	KIRDLLPVM		C1203	9	FTAWRILEV		C1402	9	NFNMSVSSM		C1403	9
C0102	9	QLPSGWASI		C0302	9	LSFTHPISF		C0303	9	FSEGGERLL		C0304	9	FQSSAVMAL		C0701	9	RVQEAIIHF		C0702	9	QYPGRSLVF		C0704	9	TSSAHYIIL		C0801	9	IGAPVGISL		C0802	9	FVDVQPSSL		C1202	9	KIRPHIATL		C1203	9	FTFGFIQVM		C1402	9	NFPEHIFPA		C1403	9
C0102	9	QSPASLSSL		C0302	9	LSFTHPTSF		C0303	9	FSEPFHLIV		C0304	9	FQTEVGKQL		C0701	9	RVQGFQVEY		C0702	9	RAGLPAPTI		C0704	9	TVILHSIYL		C0801	9	IIDDPNLVV		C0802	9	FVDVSSVPL		C1202	9	KLPDFESRY		C1203	9	FTFPGCRAL		C1402	9	NFPGIVTSF		C1403	9
C0102	9	QSPDGVLDL		C0302	9	LSHSLLVTL		C0303	9	FSESHLVII		C0304	9	FQTHTTPVL		C0701	9	RVVSYQIRY		C0702	9	RKNPFVYKV		C0704	9	TVNGMTITM		C0801	9	IIDDTIFNL		C0802	9	FVEDSKVVL		C1202	9	KLPDIFSVY		C1203	9	FTFPGNLVT		C1402	9	NFPIKARSL		C1403	9
C0102	9	QSPEGMISL		C0302	9	LSIPRLPSM		C0303	9	FSFEAQGGL		C0304	9	FQTIARNAL		C0701	9	RVYVHPFHL		C0702	9	RRAEVELEY		C0704	9	TVNRTVITM		C0801	9	IIDDVMKEL		C0802	9	FVEEEEHFL		C1202	9	KQAEIVKRL		C1203	9	FTFTPTVTY		C1402	9	NFPKVATSF		C1403	9
C0102	9	QSPFFPVVL		C0302	9	LSIPYRLIF		C0303	9	FSFHHVLSL		C0304	9	FQVNHTVAL		C0701	9	RYSEAVFYY		C0702	9	RRDYVFIEF		C0704	9	TYMPHVHIL		C0801	9	IIDETMAQL		C0802	9	FVEETVYLL		C1202	9	KQFHRIVTY		C1203	9	FTGPLRPFF		C1402	9	NFPNGVTDF		C1403	9
C0102	9	QSPQTLLEL		C0302	9	LSKGPGLEV		C0303	9	FSFPEPEAL		C0304	9	FQYPAESVL		C0701	9	RYVEFNLLY		C0702	9	RRFDTAFFL		C0704	9	VAAAHSVVL		C0801	9	IIDRTNTTL		C0802	9	FYDEIKIEL		C1202	9	KQFPEVIKY		C1203	9	FTHSQFIVV		C1402	9	NFQAIRVTL		C1403	9
C0102	9	QTIGARKEL		C0302	9	LSMERMVPA		C0303	9	FSFVRITAL		C0304	9	FQYPDTRYL		C0701	9	RYYHCAVTL		C0702	9	RRFFPYYVY		C0704	9	VAMDSIIHM		C0801	9	IIFEDDRCL		C0802	9	FYDVQFKEL		C1202	9	KSFPGGKEY		C1203	9	FTIFRTISV		C1402	9	NFQAIVISL		C1403	9
C0102	9	QTPDGVHCL		C0302	9	LSSTVTLEH		C0303	9	FSFVRVISL		C0304	9	FQYSKSPSL		C0701	9	SAPDKSLEL		C0702	9	RRFMQTFVL		C0704	9	VAMTGEITL		C0801	9	IITDFDMTL		C0802	9	GADAGQLDL		C1202	9	KSIHIVVTM		C1203	9	FTIPHTQEA		C1402	9	NFQTAKEAL		C1403	9
C0102	9	QTPDIKVSL		C0302	9	LTHLFKNYF		C0303	9	FSHAQTVVL		C0304	9	FQYSSHVSL		C0701	9	SAPVPASPL		C0702	9	RRFTEIYEF		C0704	9	VANPEHMEM		C0801	9	IITKAYLEV		C0802	9	GADELGEVI		C1202	9	KSKNPGEAL		C1203	9	FTKWVNSHL		C1402	9	NFYNFASSF		C1403	9
C0102	9	QTPGHTEEL		C0302	9	LTHPFFEPF		C0303	9	FSHEVGSEL		C0304	9	FSADGHTML		C0701	9	SGPGPAAAL		C0702	9	RRGDFIHVM		C0704	9	VAPPGCSHL		C0801	9	IITTVGPEL		C0802	9	GADERIFSL		C1202	9	KSMFQRTTY		C1203	9	FTLPFRIFY		C1402	9	NFYSTEVSV		C1403	9
C0102	9	QTPLALRSL		C0302	9	LTTDISLIF		C0303	9	FSHPREPAL		C0304	9	FSAGEPRVL		C0701	9	SIIAEVKAQ		C0702	9	RRGEYVLTF		C0704	9	VASEYPVIL		C0801	9	IIVDIFHGL		C0802	9	GADFLVTEV		C1202	9	KSNELFTTF		C1203	9	FTLWWSPTI		C1402	9	NYAEYQVCL		C1403	9
C0102	9	QTPVGVSTL		C0302	9	LTVEPGASL		C0303	9	FSIADSIEL		C0304	9	FSDDSDLQL		C0701	9	SINQFALEL		C0702	9	RRIDFVLVY		C0704	9	VDHEKIYRM		C0801	9	IIYDIMNEL		C0802	9	GADHVVKPL		C1202	9	KSPSHVWIF		C1203	9	FTMEMVRQY		C1402	9	NYETMGRAL		C1403	9
C0102	9	QVIEKTKSL		C0302	9	LVFPFRTFY		C0303	9	FSIDPARTL		C0304	9	FSDFEARQL		C0701	9	SIPLALALS		C0702	9	RRIEIAHSL		C0704	9	VDHEKPLSF		C0801	9	ILADCTLIL		C0802	9	GADIASKEF		C1202	9	KSSEVFTTF		C1203	9	FTNPKVREW		C1402	9	NYFLRLCSF		C1403	9
C0102	9	QVNDLTTAL		C0302	9	LVIDKLKEM		C0303	9	FSIDRALNV		C0304	9	FSDLTMHEL		C0701	9	SNFLHPVIY		C0702	9	RRKDGVFLY		C0704	9	VDLERTIAL		C0801	9	ILDPHVVLL		C0802	9	GADIDALCV		C1202	9	KSVDWLLVF		C1203	9	FTPNNIKQV		C1402	9	NYFPGGVAL		C1403	9
C0102	9	QVNGAATEL		C0302	9	LVLAPTREL		C0303	9	FSIDSPDSL		C0304	9	FSDPIHPQL		C0701	9	SPREAARVL		C0702	9	RRMENLVAY		C0704	9	VELPHINLL		C0801	9	INKKEGICA		C0802	9	GADIHSKEF		C1202	9	KSVRPGASY		C1203	9	FTPPVVKRL		C1402	9	NYHAMTEFL		C1403	9
C0102	9	QVPVVMTSL		C0302	9	LVNGKSLEL		C0303	9	FSIEPWLKV		C0304	9	FSDPVYKEI		C0701	9	SRADTILCL		C0702	9	RRMEVYNEF		C0704	9	VGGEALELR		C0801	9	IPFYGILGA		C0802	9	GADISKTVM		C1202	9	KTFDHYCEY		C1203	9	FTRPEIVVF		C1402	9	NYHWQETAY		C1403	9
C0102	9	RAALRSCSL		C0302	9	LVREIAQDF		C0303	9	FSIGADTAL		C0304	9	FSEEDYRTL		C0701	9	SRAKAVRAL		C0702	9	RRNDKIIVF		C0704	9	VGHPFVIQL		C0801	9	IPHLVTHDA		C0802	9	GADKSSNFL		C1202	9	KTGPVAKEL		C1203	9	FTSEKFLVM		C1402	9	NYIDKVRFL		C1403	9
C0102	9	RAPAAGESL		C0302	9	MAAMPQTVY		C0303	9	FSIPFAPHI		C0304	9	FSEEMNRVL		C0701	9	SRAPVFLQF		C0702	9	RRNPEPLRF		C0704	9	VINPEPITL		C0801	9	IQCEIFQVL		C0802	9	GADLKNGAL		C1202	9	KTKDPTAAL		C1203	9	FTSPAVKRL		C1402	9	NYIEFTRIL		C1403	9
C0102	9	RAPASAEAM		C0302	9	MADPNIRFL		C0303	9	FSIPILMQL		C0304	9	FSEGGERLL		C0701	9	SRDKFIREL		C0702	9	RRNPGVVIY		C0704	9	VIPESVILL		C0801	9	IQRTPKIQV		C0802	9	GADLPNLLF		C1202	9	KTPDFILQV		C1203	9	FTSPFCLQV		C1402	9	NYIEGTKML		C1403	9
C0102	9	RAPDVARAL		C0302	9	MAFLYHVAY		C0303	9	FSIPVVSDV		C0304	9	FSEGLIKAL		C0701	9	SRFAKVHIL		C0702	9	RRNPYCRTL		C0704	9	VIPGHLIFL		C0801	9	ISCKEELLL		C0802	9	GADLPNLTP		C1202	9	KTQKPSKPF		C1203	9	FTVDQIRAI		C1402	9	NYIEKVVAI		C1403	9
C0102	9	RAPEAQQTL		C0302	9	MAHSFGESY		C0303	9	FSIPVVWTL		C0304	9	FSEPFHLIV		C0701	9	SRFDMIFIV		C0702	9	RRPPILEDY		C0704	9	VIQEAFIEL		C0801	9	ISDPFIFNL		C0802	9	GADLPNYRW		C1202	9	KTRIPPRTY		C1203	9	FTVEQQRIL		C1402	9	NYIHVGAQL		C1403	9
C0102	9	RAPEEVHAL		C0302	9	MALAVRVVY		C0303	9	FSITPLSEL		C0304	9	FSESHLVII		C0701	9	SRFEKEFSF		C0702	9	RRQEAIYEM		C0704	9	VITGVDIVM		C0801	9	ISDTQRISL		C0802	9	GADLPSNHV		C1202	9	KVADPVVTF		C1203	9	FTVPHTHVF		C1402	9	NYIMQSHSL		C1403	9
C0102	9	RAPEFLQTL		C0302	9	MALLFLLPL		C0303	9	FSLDLVHTL		C0304	9	FSFDGPEIM		C0701	9	SRFGNAFHL		C0702	9	RRQNVAYEY		C0704	9	VLMDHILNL		C0801	9	ISFECSEAL		C0802	9	GADNGTMHL		C1202	9	KVAQPKEVY		C1203	9	FTVTFNPKY		C1402	9	NYIRDRLAL		C1403	9
C0102	9	RAPEGQLPA		C0302	9	MANGAVIHL		C0303	9	FSLETHTAL		C0304	9	FSFEAQGGL		C0701	9	SRFIFNYVY		C0702	9	RRTDCAYVV		C0704	9	VNNPHFLIM		C0801	9	ISFFIGQEL		C0802	9	GADPSTVEM		C1202	9	KVFNIPSSF		C1203	9	FTYDQRTEF		C1402	9	NYMAHLVEV		C1403	9
C0102	9	RAPGPWQAM		C0302	9	MANPTALLL		C0303	9	FSLLPLSHL		C0304	9	FSFHHVLSL		C0701	9	SRFSNVYHL		C0702	9	RRWEQALTF		C0704	9	VQPTHVIHL		C0801	9	ISHCYPEYL		C0802	9	GADRLQTGM		C1202	9	LAADCAHEL		C1203	9	FTYHHIQEI		C1402	9	NYMMRNAVL		C1403	9
C0102	9	RAPVPASEL		C0302	9	MAPLKMLAL		C0303	9	FSLPGATCL		C0304	9	FSFLPTRAL		C0701	9	SRFTYPYLL		C0702	9	RYHPQALIY		C0704	9	VRMENVTVL		C0801	9	ISHVIVDEI		C0802	9	GADVFLEAL		C1202	9	LAADIFAIA		C1203	9	FTYPYLLAI		C1402	9	NYNFQYISL		C1403	9
C0102	9	RAPWTSTSV		C0302	9	MATVVYKVF		C0303	9	FSLPHPEAL		C0304	9	FSFPEPEAL		C0701	9	SRGDFLRHL		C0702	9	RYKDLRTAY		C0704	9	VRNEHFWTL		C0801	9	ISISDHTAL		C0802	9	GADVVSKFL		C1202	9	LAAPVISVL		C1203	9	FVADLQRVI		C1402	9	NYNPAQQAF		C1403	9
C0102	9	RGPGPRSSL		C0302	9	MAVEFLHEL		C0303	9	FSLPPGHAV		C0304	9	FSFVRITAL		C0701	9	SRGDFVVEY		C0702	9	RYLTVAAVF		C0704	9	VRNNVIIVM		C0801	9	ISQVFEIAL		C0802	9	GEPDHNEAL		C1202	9	LAASASAEF		C1203	9	FVFETPFTL		C1402	9	NYNTIFQYY		C1403	9
C0102	9	RIAEFTTNL		C0302	9	MAYVSGLSF		C0303	9	FSMDIIDSL		C0304	9	FSFVRVISL		C0701	9	SRGDVKVIM		C0702	9	RYNDITKVY		C0704	9	VRNPFTVTV		C0801	9	ISSLLEEQF		C0802	9	GGDIANRVL		C1202	9	LAFEWLGHF		C1203	9	FVFPGELLL		C1402	9	NYPAFMMEM		C1403	9
C0102	9	RIMEFTTTL		C0302	9	MIIEPTSPC		C0303	9	FSMLESPAL		C0304	9	FSHAQTVVL		C0701	9	SRGEGIRTL		C0702	9	RYNGLSFVY		C0704	9	VRNPRITSL		C0801	9	ISSPVVTSL		C0802	9	GGFDPHDVL		C1202	9	LAFPGEMLL		C1203	9	FVFSTVVIH		C1402	9	NYPGLSISL		C1403	9
C0102	9	RIPAYFVTV		C0302	9	MSVQPTVSL		C0303	9	FSNAHINEL		C0304	9	FSHHRVTVL		C0701	9	SRIAGIRVL		C0702	9	RYPAEIRKY		C0704	9	VRPSYWLVL		C0801	9	ISVASFQEL		C0802	9	GIDSPSSSV		C1202	9	LAFPTGCSL		C1203	9	FVHDLVLYL		C1402	9	NYPVTGLAF		C1403	9
C0102	9	RIPDQLGYL		C0302	9	MVADKFTEL		C0303	9	FSNGHIKVL		C0304	9	FSHPQAAQL		C0701	9	SRIGHIAHL		C0702	9	RYPDLELKY		C0704	9	VRPTNVLEM		C0801	9	ITAPPGTAA		C0802	9	GIDSPVSEL		C1202	9	LAFSRLIVE		C1203	9	FVHPDPLWI		C1402	9	NYQAYRSYL		C1403	9
C0102	9	RIPSAFRHL		C0302	9	NAFDVFAAY		C0303	9	FSNLGTTHL		C0304	9	FSHPREPAL		C0701	9	SRIHPVSTM		C0702	9	RYPNIELSY		C0704	9	VRSPVVHSV		C0801	9	ITAPPSRVL		C0802	9	GIDVQGVEL		C1202	9	LAGQATTAY		C1203	9	FVKDSIRLV		C1402	9	NYQVQFVTL		C1403	9
C0102	9	RIPSFVTEL		C0302	9	NAHEFITSF		C0303	9	FSNPRALYL		C0304	9	FSIADSIEL		C0701	9	SRITTHFEL		C0702	9	RYREAIIKY		C0704	9	VSHDSTVCL		C0801	9	ITDPSVIVM		C0802	9	GIDVQQVSL		C1202	9	LAHEVGWKY		C1203	9	FVKPAVVTV		C1402	9	NYVDLVSSL		C1403	9
C0102	9	RIPVHSSAL		C0302	9	NAIEGLTEY		C0303	9	FSPFHASVL		C0304	9	FSIDPARTL		C0701	9	SRKSFVFEL		C0702	9	RYRPGTVAL		C0704	9	VSTWLAIIL		C0801	9	ITHLLGVAL		C0802	9	GLDVPSLCL		C1202	9	LAIEHVRFF		C1203	9	FVLMASYLI		C1402	9	NYVPEVSAL		C1403	9
C0102	9	RIQEELSAL		C0302	9	NAIIFRESF		C0303	9	FSQPGLRSL		C0304	9	FSIDSPDSL		C0701	9	SRLFFVIEY		C0702	9	RYSEAVFYY		C0704	9	VTIKKDVDG		C0801	9	ITTDCLQIL		C0802	9	GNDLPSVEL		C1202	9	LAINHAYFY		C1203	9	FVNEIISRI		C1402	9	NYYPGSLFL		C1403	9
C0102	9	RLIKDTLAL		C0302	9	NALPALLIY		C0303	9	FSQPKVTEL		C0304	9	FSIEPWLKV		C0701	9	SRLGSSRVL		C0702	9	SAPDKSLEL		C0704	9	VTIPTAHVM		C0801	9	ITTEVVNEL		C0802	9	GQDLAKQAL		C1202	9	LAIPITNTY		C1203	9	FVNPHVSSF		C1402	9	NYYTPITPH		C1403	9
C0102	9	RLINQVLEL		C0302	9	NAMDVVVQF		C0303	9	FSQPRHISV		C0304	9	FSIGADTAL		C0701	9	SRLSFCQEL		C0702	9	SAPGIISAL		C0704	9	VTMPCTWVM		C0801	9	ITYDDRFNL		C0802	9	GQDTPGVSL		C1202	9	LAKAPFAAH		C1203	9	FVPVFVAVL		C1402	9	QFLRGARAM		C1403	9
C0102	9	RLPAWQPIL		C0302	9	NAVAALSEI		C0303	9	FSSANSPFL		C0304	9	FSIGVGSRL		C0701	9	SRMPGELVL		C0702	9	SAPVPASPL		C0704	9	VVADHGLTL		C0801	9	IVDNTTMQL		C0802	9	GSDDATCRL		C1202	9	LAKASGNTL		C1203	9	FVRDMIREV		C1402	9	QYFTARTSL		C1403	9
C0102	9	RLPCSFATL		C0302	9	NGFGGFGSY		C0303	9	FSSDNIAVL		C0304	9	FSINPLENL		C0701	9	SRMYFTQTL		C0702	9	SFYFFFSSF		C0704	9	VVAPHTLKL		C0801	9	IVDQVMVTL		C0802	9	GSDDIHNAL		C1202	9	LAKEVGTSY		C1203	9	FVSPLVKYL		C1402	9	QYLELAHSL		C1403	9
C0102	9	RLPDGFTQL		C0302	9	NIREIEIDY		C0303	9	FSSDVTHEM		C0304	9	FSIPFAPHI		C0701	9	SRNAYMLVY		C0702	9	SKADALFEL		C0704	9	VVMNVVHQL		C0801	9	IVIDPKNPL		C0802	9	GSDEPPVFL		C1202	9	LAKGEVTEM		C1203	9	FVVDHCPYM		C1402	9	QYPDFNNYL		C1403	9
C0102	9	RLPEELRSL		C0302	9	NVYDFKTTY		C0303	9	FSSEVTAAL		C0304	9	FSIPILMQL		C0701	9	SRNDFTLQL		C0702	9	SKIDYFLEY		C0704	9	VVPDHPVLL		C0801	9	IVIGVLHQL		C0802	9	GSDESYRPL		C1202	9	LAKGGTVEY		C1203	9	FVVDHVIKI		C1402	9	QYPENILSF		C1403	9
C0102	9	RLPERMTTL		C0302	9	PIRLLAAAA		C0303	9	FSSPHLQML		C0304	9	FSIPVVSDV		C0701	9	SRNEGVATY		C0702	9	SKNPHIVSF		C0704	9	VYNENLVHM		C0801	9	IVKPVKVSA		C0802	9	GSDGHSMAL		C1202	9	LAKGWAPTF		C1203	9	FVVEHDFIM		C1402	9	QYPGSALAL		C1403	9
C0102	9	RLPESNQTL		C0302	9	QAFEFSEAF		C0303	9	FSSPSFQTL		C0304	9	FSITPLSEL		C0701	9	SRNEIIQSY		C0702	9	SKSPFIVHL		C0704	9	WLPNHVVFL		C0801	9	KAAAAKVEL		C0802	9	GSDIGNVVL		C1202	9	LAKTGVHHY		C1203	9	FVVERQPCM		C1402	9	QYPWGVAEV		C1403	9
C0102	9	RLPGRSTSL		C0302	9	QATPVPLEF		C0303	9	FSSSSHLII		C0304	9	FSLAPITKL		C0701	9	SRNNFIRNY		C0702	9	SRADTILCL		C0704	9	YAAPHFFHL		C0801	9	KAADIDQEV		C0802	9	GSDPRVTQL		C1202	9	LAKTQGNVF		C1203	9	FVYENPISL		C1402	9	QYQPPAPAL		C1403	9
C0102	9	RLPHSTAAL		C0302	9	QAVAIFTVY		C0303	9	FSTDSPRLL		C0304	9	FSLDLVHTL		C0701	9	SRNPQSYHL		C0702	9	SRAIFEEVY		C0704	9	YAHILAVLL		C0801	9	KAADTIEAL		C0802	9	GVDEATRAV		C1202	9	LALEPGVAY		C1203	9	FVYLRQPYY		C1402	9	QYVIQLTSM		C1403	9
C0102	9	RLPPKVESL		C0302	9	QIAEFKEAF		C0303	9	FSTGNFNVL		C0304	9	FSLLPLSHL		C0701	9	SRNPTFMCL		C0702	9	SRAMLLTSY		C0704	9	YAIESQLQL		C0801	9	KAAELEMEL		C0802	9	GVDEPGWVL		C1202	9	LANKLITVY		C1203	9	FWVPFNVVL		C1402	9	RFFAQSQSL		C1403	9
C0102	9	RLPPLLSPL		C0302	9	QQNPQPLIF		C0303	9	FSTLYGRVL		C0304	9	FSLPHPEAL		C0701	9	SRPENAIIY		C0702	9	SRAPSTYTY		C0704	9	YAIEVDPVL		C0801	9	KAASVRPVL		C0802	9	GVDHPSHTL		C1202	9	LAQTTRTAY		C1203	9	GAAEIISRI		C1402	9	RFFDGAKDV		C1403	9
C0102	9	RLPPYSSQL		C0302	9	RAAPFSLEY		C0303	9	FSTPLNPLL		C0304	9	FSLPPGHAV		C0701	9	SRPNIILVM		C0702	9	SRFAKVHIL		C0704	9	YANFNRIIL		C0801	9	KACDYIQEL		C0802	9	GVDLPSVNL		C1202	9	LARCSIVSY		C1203	9	GAFGLPITV		C1402	9	RFFTSSTSL		C1403	9
C0102	9	RLPSEVSAL		C0302	9	RAINIALQL		C0303	9	FSTSVVRPF		C0304	9	FSMDIIDSL		C0701	9	SRPRVVIQL		C0702	9	SRFEKEFSF		C0704	9	YATDLVVCV		C0801	9	KACDYIREL		C0802	9	GVDLSKIPL		C1202	9	LARDFLDEY		C1203	9	GAFSGIQQM		C1402	9	RFHEMHVAL		C1403	9
C0102	9	RLPSRVLEL		C0302	9	RAIQFYLEF		C0303	9	FSVEGQLEF		C0304	9	FSMEEGDVL		C0701	9	SRPSTYYEL		C0702	9	SRFGNAFHL		C0704	9	YDLLRNTNF		C0801	9	KACFLYFKL		C0802	9	GVDLVLNSL		C1202	9	LARIIDSEY		C1203	9	GAISKIFVL		C1402	9	RFHTITTSY		C1403	9
C0102	9	RLPTSKRSL		C0302	9	RALDHYLTL		C0303	9	FSVENKWSL		C0304	9	FSMLESPAL		C0701	9	SRQGCTITM		C0702	9	SRFIFNYVY		C0704	9	YGIEHALAL		C0801	9	KADAVVPEL		C0802	9	HADDPERVV		C1202	9	LARPLPVEY		C1203	9	GASFLLKVW		C1402	9	RFIGATANF		C1403	9
C0102	9	RLPVNVREL		C0302	9	RGYDFPAVL		C0303	9	FSVEQITAM		C0304	9	FSNAHINEL		C0701	9	SRSEYLNRL		C0702	9	SRFIKFQEM		C0704	9	YGIENEVFL		C0801	9	KADGVGPPL		C0802	9	HADDSFLVL		C1202	9	LARTAGTSF		C1203	9	GASQLFRIW		C1402	9	RFIGAVNNM		C1403	9
C0102	9	RMPDCSVAL		C0302	9	RIADLISSF		C0303	9	FSVKAGEAL		C0304	9	FSNGHIKVL		C0701	9	SRSHSVFQL		C0702	9	SRFLNKQPY		C0704	9	YGNPNTLRL		C0801	9	KADGVPVYL		C0802	9	HADHSSLTL		C1202	9	LASAVISVL		C1203	9	GAVDRVLQV		C1402	9	RFIPSAYPY		C1403	9
C0102	9	RNPPAFTEL		C0302	9	RIIEETLAL		C0303	9	FSVNLFRTL		C0304	9	FSNPETLDL		C0701	9	SRSVIIREL		C0702	9	SRFNRYYSL		C0704	9	YGSPNALVL		C0801	9	KADMNVHLL		C0802	9	HADILLINL		C1202	9	LASEIYDIL		C1203	9	GAYEQVIKY		C1402	9	RFIPYTEEF		C1403	9
C0102	9	RQPAKVAAL		C0302	9	RIVDALNEF		C0303	9	FSVPGGHNL		C0304	9	FSNPRALYL		C0701	9	SRTGYVHIY		C0702	9	SRFPEALRL		C0704	9	YGYEHILTL		C0801	9	KADNVGSAL		C0802	9	HADIPETCV		C1202	9	LASELIQVH		C1203	9	GAYGKVFLV		C1402	9	RFLDKALEL		C1403	9
C0102	9	RQPYAVSEL		C0302	9	RSFPGFQAF		C0303	9	FSVPGSMKL		C0304	9	FSQALQHAL		C0701	9	SRVEAVYVL		C0702	9	SRFSNVYHL		C0704	9	YIPNKVLIL		C0801	9	KADPQGPEL		C0802	9	HADLAGVPL		C1202	9	LASPIYTHF		C1203	9	GAYGQAVRY		C1402	9	RFLENALAV		C1403	9
C0102	9	RSPEEVTEL		C0302	9	SAADFFSHY		C0303	9	FSVPHTKSL		C0304	9	FSQEEFRNL		C0701	9	SRVIHIRKL		C0702	9	SRFTYPYLL		C0704	9	YIVDHTIIM		C0801	9	KADPSHFEL		C0802	9	HADPEPSVI		C1202	9	LASPVSPEL		C1203	9	GAYKYIQEL		C1402	9	RFLYSNIAF		C1403	9
C0102	9	RSPGRAYAL		C0302	9	SAAFPGASL		C0303	9	FSVPVAWTL		C0304	9	FSQIPNNGL		C0701	9	SRVKLILEY		C0702	9	SRGDFVVEY		C0704	9	YKNGWIVMI		C0801	9	KADSVVVLL		C0802	9	HADPTELAL		C1202	9	LATEVVTVF		C1203	9	GAYTVTIKY		C1402	9	RFPDFVRDF		C1403	9
C0102	9	RSPPPGMGL		C0302	9	SAAQPGVAF		C0303	9	FSYAFPKAV		C0304	9	FSQKSFLVL		C0701	9	SRVQYFWEA		C0702	9	SRGDVKVIM		C0704	9	YLPQHTIET		C0801	9	KAFADPEVL		C0802	9	HADTVGIDA		C1202	9	LAVGLTSCF		C1203	9	GIPEFWLTV		C1402	9	RFPDLTVEL		C1403	9
C0102	9	RSPSWQTAM		C0302	9	SAFDHFASV		C0303	9	FSYAFPKEF		C0304	9	FSQPGLRSL		C0701	9	SRYGDIRRL		C0702	9	SRGEQAWTL		C0704	9	YMIAHITGL		C0801	9	KAFADSSYL		C0802	9	HADVARAML		C1202	9	LIHVPLETF		C1203	9	GSFGRVMLV		C1402	9	RFPDTVKQM		C1403	9
C0102	9	RSPVVHSVL		C0302	9	SAFGYFITA		C0303	9	FSYEHFYVI		C0304	9	FSQPKVTEL		C0701	9	SRYQDILVF		C0702	9	SRHLDSYEF		C0704	9	YMIDNVILL		C0801	9	KAFFDRSSL		C0802	9	HADVGVALL		C1202	9	LIKETTTGY		C1203	9	GTPPWVKRY		C1402	9	RFPEHVREI		C1403	9
C0102	9	RTPAAVREL		C0302	9	SAFSGFPSF		C0303	9	FSYEVSRSL		C0304	9	FSQPSLTTL		C0701	9	SSLLEKGLD		C0702	9	SRHSIPSEM		C0704	9	YMLEHVITL		C0801	9	KAFFTSKAL		C0802	9	HAMQFPAEL		C1202	9	LIKRNKQTY		C1203	9	GTVQILIKV		C1402	9	RFPELSLAL		C1403	9
C0102	9	RTPLHEIAL		C0302	9	SAHLAFMTF		C0303	9	FSYGSGLAA		C0304	9	FSQPVFPYL		C0701	9	SSNPVYMEM		C0702	9	SRIHPVSTM		C0704	9	YNQGFEIVL		C0801	9	KAFNDPSAL		C0802	9	HCDVPGLHC		C1202	9	LIRDNRVVY		C1203	9	GVISKIIIF		C1402	9	RFPNFTNQL		C1403	9
C0102	9	RTPSDVKEL		C0302	9	SAHLFEVEL		C0303	9	FSYHQFIHL		C0304	9	FSSAIGLVL		C0701	9	SSPEFSKTL		C0702	9	SRIQYEMEY		C0704	9	YRHPDPREL		C0801	9	KAFQKIVVL		C0802	9	HFDASHVAL		C1202	9	LIREYIVEY		C1203	9	HAAELIKTV		C1402	9	RFPQHYKSL		C1403	9
C0102	9	RTPSSSSTL		C0302	9	SAIGYIHSL		C0303	9	FSYITAVTL		C0304	9	FSSANSPFL		C0701	9	STNAYMLIY		C0702	9	SRKELPEYY		C0704	9	YRNAYTMVL		C0801	9	KAFSDCSAL		C0802	9	HFDLSVIEL		C1202	9	LIRPVSASF		C1203	9	HAAHIISEL		C1402	9	RFQDLIREL		C1403	9
C0102	9	RVEERLSAL		C0302	9	SAIHVLASL		C0303	9	FSYLNPQEL		C0304	9	FSSDNIAVL		C0701	9	STPDHSFSL		C0702	9	SRKGPAPEL		C0704	9	YRNPVSQCM		C0801	9	KAFSDHSSL		C0802	9	HIDFGGTSV		C1202	9	LLKSPGACF		C1203	9	HAAKVILQV		C1402	9	RFQDQVLDL		C1403	9
C0102	9	RVIDLRAEL		C0302	9	SAINELMQM		C0303	9	FSYPAGTEL		C0304	9	FSSDVTHEM		C0701	9	SVKHFHVEY		C0702	9	SRKSFVFEL		C0704	9	YRPAYLVTL		C0801	9	KAFTQTSHL		C0802	9	HIDGDHLTL		C1202	9	LMMGHPGMH		C1203	9	HAAPCMLFM		C1402	9	RFQNYMVAL		C1403	9
C0102	9	RVNSTMTTL		C0302	9	SAIPHPLIM		C0303	9	FSYSCPKFL		C0304	9	FSSEVTAAL		C0701	9	SVLPFQIYY		C0702	9	SRLFQPVQY		C0704	9	YRPLYPFSL		C0801	9	KAFVFSVAL		C0802	9	HIDPNFASL		C1202	9	LQAESIVVH		C1203	9	HAAPFQNIL		C1402	9	RFSLNTVEL		C1403	9
C0102	9	RVPLASQGL		C0302	9	SALEKFFYF		C0303	9	FSYTGRVAV		C0304	9	FSSPHLQML		C0701	9	SVNRYILQL		C0702	9	SRNAITSSY		C0704	9	YRPNETFHL		C0801	9	KAHLMEIQV		C0802	9	HIDSGKTAL		C1202	9	LQIGVIRVY		C1203	9	HAAPFSKVL		C1402	9	RFYAFGRVF		C1403	9
C0102	9	RVPRNIKSL		C0302	9	SALFFGNAF		C0303	9	FSYVTPRAF		C0304	9	FSSPHLVQV		C0701	9	SVVFHSTVI		C0702	9	SRNAYMLVY		C0704	9	YRQKQVVIL		C0801	9	KAHVFECNL		C0802	9	HIDSGKTTL		C1202	9	LSADPRSVY		C1203	9	HAASTVQIL		C1402	9	RFYEGVVEL		C1403	9
C0102	9	RVPSAGSSL		C0302	9	SAMPTVRSF		C0303	9	FTADPLSLL		C0304	9	FSSPSFQTL		C0701	9	SYIGFPVEL		C0702	9	SRNEGVATY		C0704	9	YRTDMIQAL		C0801	9	KAIDIYEQV		C0802	9	HIDTVINAL		C1202	9	LSAPIHTQM		C1203	9	HAASVFLTL		C1402	9	RYFGPAAAL		C1403	9
C0102	9	RVPTANVSV		C0302	9	SANDIYLIF		C0303	9	FTADVRSVL		C0304	9	FSTGNFNVL		C0701	9	TAPQGNVDL		C0702	9	SRNEIIQSY		C0704	9	YRTPTTHTM		C0801	9	KAIDLMNAL		C0802	9	HIDVITAEM		C1202	9	LSFLIPSSL		C1203	9	HACGVIATI		C1402	9	RYIGKTMDY		C1403	9
C0102	9	RVPYRDSKL		C0302	9	SANIRLTAM		C0303	9	FTAPATVSL		C0304	9	FSTLYGRVL		C0701	9	TNHLHQTPL		C0702	9	SRNKDTYFL		C0704	9	YSAPVIHVL		C0801	9	KAIEQADLL		C0802	9	HIDVMYTTL		C1202	9	LSFPTTKTY		C1203	9	HAFPYIKTR		C1402	9	RYIPDAMNL		C1403	9
C0102	9	SAAQRLTAL		C0302	9	SANNVYLVM		C0303	9	FTDASFLTL		C0304	9	FSTPLNPFL		C0701	9	TRAQWFYEY		C0702	9	SRPALPFIL		C0704	9	YSDDIPHAL		C0801	9	KAIEVLLTL		C0802	9	HLDDALRAL		C1202	9	LSHLPSHHY		C1203	9	HAFSFPLLI		C1402	9	RYIPTAAAF		C1403	9
C0102	9	SANFSYNAL		C0302	9	SAPIFTTSL		C0303	9	FTDSGIHII		C0304	9	FSTPLNPLL		C0701	9	TRDPLVIEL		C0702	9	SRPDGSASF		C0704	9	YSHPGVVFL		C0801	9	KAIGLFISF		C0802	9	HLDDQMTLL		C1202	9	LSKDDIENM		C1203	9	HAFWGGSVV		C1402	9	RYLEKCIAY		C1403	9
C0102	9	SANYTEIAL		C0302	9	SAVSIFHEL		C0303	9	FTDTERLIG		C0304	9	FSTSVVRPF		C0701	9	TRGDYAPIL		C0702	9	SRPDTECKF		C0704	9	YSSPFDPVL		C0801	9	KAIGPHDVL		C0802	9	HLDEAIHVL		C1202	9	LSKGPGLEV		C1203	9	HAIDHRLSI		C1402	9	RYLGGSMDL		C1403	9
C0102	9	SAPAAAAGL		C0302	9	SAWSFITTF		C0303	9	FTEAGLKEL		C0304	9	FSTVVIHFL		C0701	9	TRIPRVRVL		C0702	9	SRPEANEAL		C0704	9	YSTPHAFTF		C0801	9	KAINVFVSA		C0802	9	HLDEARTLL		C1202	9	LSKLPCGEY		C1203	9	HAIKSVKIY		C1402	9	RYLGKVLEL		C1403	9
C0102	9	SAPARQAVL		C0302	9	SAYAGFLAL		C0303	9	FTEGNFAIL		C0304	9	FSVAVSPSL		C0701	9	TRMRHVISY		C0702	9	SRPEAPNEF		C0704	9	YTNGKCVIL		C0801	9	KAIQDTNNL		C0802	9	HLDEDQQEL		C1202	9	LSPTPATAL		C1203	9	HAMQFPAEL		C1402	9	RYLSKVLEL		C1403	9
C0102	9	SAPASQASL		C0302	9	SAYNAFNRF		C0303	9	FTEKSGRLL		C0304	9	FSVEGQLEF		C0701	9	TRMSTVSEL		C0702	9	SRPENAIIY		C0704	9	YTNPSGIVL		C0801	9	KAIRPQIDL		C0802	9	HLDEVFLEL		C1202	9	LTFPHPVYY		C1203	9	HATIIPKVL		C1402	9	RYLTVAAVF		C1403	9
C0102	9	SAPASTTAV		C0302	9	SAYVKKIQF		C0303	9	FTFPDPPPL		C0304	9	FSVENKWSL		C0701	9	TRNDYVMMY		C0702	9	SRPESFAIY		C0704	9	YTSNIPIIL		C0801	9	KAIRPYHAL		C0802	9	HLDFSGNAL		C1202	9	LTNLPHTDF		C1203	9	HAVEWPVVM		C1402	9	RYLYMVMEY		C1403	9
C0102	9	SAPDFQQSL		C0302	9	SGIERMGPL		C0303	9	FTFPGCRAL		C0304	9	FSVEQITAM		C0701	9	TRNPLVAVY		C0702	9	SRPGVCLVV		C0704	9	YVAPKAVWL		C0801	9	KAISGVHTV		C0802	9	HLDLSFNSL		C1202	9	LTRDTIASH		C1203	9	HAVHVALVL		C1402	9	RYMAFAHDL		C1403	9
C0102	9	SAPDKSLEL		C0302	9	SIFDDFAHY		C0303	9	FTGSTEIGR		C0304	9	FSVGLQPTL		C0701	9	TRSAIILHL		C0702	9	SRPHFLIEL		C0704	9	YVAVTPFSL		C0801	9	KALEEANAL		C0802	9	HLDSMNVSL		C1202	9	LVKEVPEEY		C1203	9	HAYIHSVQF		C1402	9	RYMNHMQSL		C1403	9
C0102	9	SAPDMRVAL		C0302	9	SIFDDFSHY		C0303	9	FTIDGPLCL		C0304	9	FSVISSSEV		C0701	9	TRSFYKHIL		C0702	9	SRPKLSFSL		C0704	9	YVHELSLEM		C0801	9	KALGIDNVL		C0802	9	HLDTAQNAL		C1202	9	MAADVSVTH		C1203	9	HAYPLIQEA		C1402	9	RYMVHLLEL		C1403	9
C0102	9	SAPDNVLEV		C0302	9	SIFDGFRDF		C0303	9	FTIDIKSFL		C0304	9	FSVKAGEAL		C0701	9	TRSKSLKIL		C0702	9	SRPLHISTF		C0704	9	YVHPFIFAL		C0801	9	KALSIFNEL		C0802	9	HLDVQPAAL		C1202	9	MAAEIKTEY		C1203	9	HAYPYPQMY		C1402	9	RYNVMHVAA		C1403	9
C0102	9	SAPDPHQQL		C0302	9	SIFDSFPTY		C0303	9	FTIFRTISV		C0304	9	FSVNLFRTL		C0701	9	TRVDTILEF		C0702	9	SRPLSAVVL		C0704	9	YVIEDDVNM		C0801	9	KAMDDTFYL		C0802	9	HMDHVSAVL		C1202	9	MAAMPQTVY		C1203	9	HFIFFVQEF		C1402	9	RYPDSILEH		C1403	9
C0102	9	SAPDPVSTL		C0302	9	SIIEYLPTL		C0303	9	FTIPHTQEA		C0304	9	FSVPFHQAL		C0701	9	TRVKAVRIL		C0702	9	SRPNIILVM		C0704	9	YVINVTTHL		C0801	9	KAMELIREL		C0802	9	HQDFPSVVL		C1202	9	MAASIGTDF		C1203	9	HFSIAFIIY		C1402	9	RYPEETLSL		C1403	9
C0102	9	SAPFLASAV		C0302	9	SIIGRLLEV		C0303	9	FTIVSPLDI		C0304	9	FSVPGGHNL		C0701	9	TRVYLILEY		C0702	9	SRPPAQTSL		C0704	9	YVVPYTIHL		C0801	9	KAPGSTSNL		C0802	9	HQDSQVNAL		C1202	9	MADPNIRFL		C1203	9	HGFAGVILI		C1402	9	RYPTSIASL		C1403	9
C0102	9	SAPGIISAL		C0302	9	SIIKKLAAL		C0303	9	FTLDVMKEL		C0304	9	FSVPHTKSL		C0701	9	TRWPGFYIL		C0702	9	SRPPCQPQF		C0704	9	YYFVFDHAL		C0801	9	KAQLQQVEA		C0802	9	HSDAQALVL		C1202	9	MAFDPTSTL		C1203	9	HGLIRKYGL		C1402	9	RYQATGLHF		C1403	9
C0102	9	SAPGPAQAM		C0302	9	SIIQRLLEV		C0303	9	FTLSHITQL		C0304	9	FSVPLPARL		C0701	9	TSPEAFLAL		C0702	9	SRPPGQGEF		C0704	9	YYKPGLLMM		C0801	9	KASAVYQAL		C0802	9	HSDDEGTVL		C1202	9	MAFSPNEKF		C1203	9	HIISFTVKY		C1402	9	RYQDAIRVF		C1403	9
C0102	9	SAPGPGLLL		C0302	9	SIKDYFLEF		C0303	9	FTMDPKLSA		C0304	9	FSVVSPSSF		C0701	9	TYVSFPLEL		C0702	9	SRPPVTLRL		C0704	9	YYSPHGHIL		C0801	9	KASDLYITL		C0802	9	HSDDGCLKL		C1202	9	MAGDIYSVF		C1203	9	HLPDFCMLM		C1402	9	RYQEALSEL		C1403	9
C0102	9	SAPGTLKTL		C0302	9	SILEKTSAY		C0303	9	FTMGGPAIS		C0304	9	FSYAFPKAV		C0701	9	VAPLPRSAL		C0702	9	SRPSTYYEL		C0704	9	YYTDFLITL		C0801	9	KASIEHEAL		C0802	9	HSDELTSLL		C1202	9	MAHQIQEMF		C1203	9	HQIDLIVQL		C1402	9	RYQEFVRAL		C1403	9
C0102	9	SAPGTTMFL		C0302	9	SILGNLKDM		C0303	9	FTMKTVLML		C0304	9	FSYAFPKEF		C0701	9	VAPPGCSHL		C0702	9	SRPYAFLEF						C0801	9	KASIIFVTL		C0802	9	HSDIVVISL		C1202	9	MAIANTRTH		C1203	9	HQSGIVQLL		C1402	9	RYQEKISAL		C1403	9
C0102	9	SAPIFTTSL		C0302	9	SIMDEFQEY		C0303	9	FTNDKIINL		C0304	9	FSYEHFYVI		C0701	9	VAPPVSGDL		C0702	9	SRQVGERTL						C0801	9	KAVDNTCKL		C0802	9	HSDSEVASL		C1202	9	MAIEAQQKF		C1203	9	HQSTVDWIV		C1402	9	RYTVQFTTM		C1403	9
C0102	9	SAPKYIDYL		C0302	9	SIQVPGMQM		C0303	9	FTNGQTVNL		C0304	9	FSYEVSRSL		C0701	9	VINPEPITL		C0702	9	SRSHSVFQL						C0801	9	KAVEHLDDL		C0802	9	HSDSPAWSL		C1202	9	MAKDNVPFH		C1203	9	HSAPFSWET		C1402	9	RYVAIARAL		C1403	9
C0102	9	SAPLGKMSL		C0302	9	SIREAGGAF		C0303	9	FTNPWTKEL		C0304	9	FSYHQFIHL		C0701	9	VRAWVVFKL		C0702	9	SRSHYSPIY						C0801	9	KAVEIYASV		C0802	9	HSDWVNITF		C1202	9	MAKQEGMEM		C1203	9	HSFLKALYY		C1402	9	RYVPRASYF		C1403	9
C0102	9	SAPLLVNAM		C0302	9	SIVENIRIY		C0303	9	FTNRTVLEL		C0304	9	FSYITAVTL		C0701	9	VRFDQVTVY		C0702	9	SRSLLESTY						C0801	9	KAVNPDEAV		C0802	9	HSETPNMEL		C1202	9	MANGAVIHL		C1203	9	HSFNIPMQL		C1402	9	RYWNSYTEF		C1403	9
C0102	9	SAPLPQSTL		C0302	9	SIYATLAIH		C0303	9	FTSAAFHEL		C0304	9	FSYLNPQEL		C0701	9	VRFHRPYRL		C0702	9	SRSLLQTTF						C0801	9	KAVNPGRSL		C0802	9	HTDDSALCM		C1202	9	MANGEIHIY		C1203	9	HSFSGVQRF		C1402	9	RYYAFDEAF		C1403	9
C0102	9	SAPMTTNGL		C0302	9	SIYWTAVTY		C0303	9	FTSEKFLVM		C0304	9	FSYMSKISL		C0701	9	VRKSIARVL		C0702	9	SRSPVYSHF						C0801	9	KAYYAGHVL		C0802	9	HTDERGFSL		C1202	9	MAPLKMLAL		C1203	9	HSYELLVEY		C1402	9	SFAAEAIAM		C1403	9
C0102	9	SAPNSPMAL		C0302	9	SLIEQTTAL		C0303	9	FTSLPGSTM		C0304	9	FSYPAGTEL		C0701	9	VRLPYPLQM		C0702	9	SRSVMTEEY						C0801	9	KICDQWDAL		C0802	9	HTDLPVSVF		C1202	9	MAQEVLTHL		C1203	9	HTFWGVVFF		C1402	9	SFAAVIQAL		C1403	9
C0102	9	SAPRPTRFL		C0302	9	SNYHFGVTY		C0303	9	FTSPFCLQV		C0304	9	FSYQVASTL		C0701	9	VRMGYQCTF		C0702	9	SRSWLSYSY						C0801	9	KICDVGVSL		C0802	9	HTDNVIQWL		C1202	9	MARSPGRAY		C1203	9	HTFYEAVGY		C1402	9	SFADFGSAL		C1403	9
C0102	9	SAPSADAPM		C0302	9	SSFGDFVAL		C0303	9	FTSPPISCV		C0304	9	FSYTGRVAV		C0701	9	VRNDIYITL		C0702	9	SRTPYHVNL						C0801	9	KICEVDLVI		C0802	9	HTDSIGLVL		C1202	9	MGFSGIVVH		C1203	9	HTFYNELRV		C1402	9	SFFGAASQY		C1403	9
C0102	9	SAPSASVGL		C0302	9	SSVPGVRLL		C0303	9	FTVMPGQTL		C0304	9	FSYVTPRAF		C0701	9	VRNNVIIVM		C0702	9	SRVEAVYVL						C0801	9	KIDRLILEL		C0802	9	HTDVADVLL		C1202	9	MGRDPGVSF		C1203	9	HTIDTILTV		C1402	9	SFFGGSNPF		C1403	9
C0102	9	SAPSNVTSL		C0302	9	STFFPFHEY		C0303	9	FTVNPKGEL		C0304	9	FTADPLSLL		C0701	9	VRNPFTVTV		C0702	9	SRVETPVSY						C0801	9	KIIDIFTTL		C0802	9	HVDAGKSTI		C1202	9	MIISPGRYF		C1203	9	HTQGFIITF		C1402	9	SFFPKVLEM		C1403	9
C0102	9	SAPSRVQAL		C0302	9	SVAGKLSVF		C0303	9	FTVPHTHVF		C0304	9	FTADVRSVL		C0701	9	VRNPRITSL		C0702	9	SRVHAALVY						C0801	9	KIIESEEEL		C0802	9	HVDDVSSAL		C1202	9	MSKAPSNTF		C1203	9	HTVGFILQL		C1402	9	SFHAAGLQM		C1403	9
C0102	9	SAPSSDKPL		C0302	9	SVPAFASSL		C0303	9	FTVPKNRSL		C0304	9	FTAMPPLTL		C0701	9	VRPPTPREL		C0702	9	SRVLQNVAF						C0801	9	KILDTFEKL		C0802	9	HVDEIKEFL		C1202	9	MTKKPGMFF		C1203	9	HTWNGIRHL		C1402	9	SFHHNVAAL		C1403	9
C0102	9	SAPSSQARL		C0302	9	SVVAVPLPL		C0303	9	FTVPQIIEM		C0304	9	FTAPATVSL		C0701	9	VRPSYWLVL		C0702	9	SRVNVAICL						C0801	9	KILNDDTAL		C0802	9	HVDESGLSL		C1202	9	MVVEERCVY		C1203	9	HVFDHPWET		C1402	9	SFHTHVKEL		C1403	9
C0102	9	SAPSTQQVL		C0302	9	TAAFLIPLL		C0303	9	FTVPRVVAV		C0304	9	FTDASFLTL		C0701	9	VRSGYYKVL		C0702	9	SRVVTVSEY						C0801	9	KITECLSEL		C0802	9	HVDGAAKSL		C1202	9	NAAAIYDLL		C1203	9	HVFWGIVFF		C1402	9	SFIAAGICF		C1403	9
C0102	9	SAPTAIKAA		C0302	9	TAAPTIGVL		C0303	9	FTVTVPKDL		C0304	9	FTDSGIHII		C0701	9	VRSPVVHSV		C0702	9	SRYDPSISF						C0801	9	KITEDFRAL		C0802	9	HVDGHLYEL		C1202	9	NAAERRGPL		C1203	9	HVINHILKA		C1402	9	SFIAFARVF		C1403	9
C0102	9	SAPTETHSL		C0302	9	TAAVFKETF		C0303	9	FTVTVPKEL		C0304	9	FTEAGLKEL		C0701	9	VRTPYTMSY		C0702	9	SRYEVPCVL						C0801	9	KLCDVTLKI		C0802	9	HVDGQTHML		C1202	9	NAAPPPVTY		C1203	9	HVPDWVWIV		C1402	9	SFIENSSAL		C1403	9
C0102	9	SAPTIATYL		C0302	9	TAFFFAGYY		C0303	9	FTYGLHMIL		C0304	9	FTEMASRVL		C0701	9	VRVPYFIDL		C0702	9	SRYVLDDEY						C0801	9	KPANVFITA		C0802	9	HVDGVAVTL		C1202	9	NAAQIFAIY		C1203	9	HVYEIPVEY		C1402	9	SFIHAAMGM		C1403	9
C0102	9	SAPTPIQAL		C0302	9	TAFGGFLKY		C0303	9	FTYNIPTCL		C0304	9	FTEQGVRLL		C0701	9	VSNKYGLVF		C0702	9	SSPAPRTAL						C0801	9	KPFKEFVEA		C0802	9	HVDLQVSAL		C1202	9	NAFHHPSAV		C1203	9	IAAGIFNDL		C1402	9	SFILKANEL		C1403	9
C0102	9	SAPTVRNAM		C0302	9	TAISLFYEL		C0303	9	FVADVRLIF		C0304	9	FTFPDPPPL		C0701	9	VTKKYHEVL		C0702	9	SSPQAGSSL						C0801	9	KPKEPQPEV		C0802	9	HVDPSGTFL		C1202	9	NAFKEITTM		C1203	9	IAAGLYLLL		C1402	9	SFIQGTTTM		C1403	9
C0102	9	SAPVNFISA		C0302	9	TALPTRIAY		C0303	9	FVAEGGPEL		C0304	9	FTIDIKSFL		C0701	9	VYKAFVDNY		C0702	9	SYFGSFSSL						C0801	9	KPKPIGKLA		C0802	9	HVDRENLVL		C1202	9	NAFPVGSEY		C1203	9	IAAKKVLRL		C1402	9	SFISEAESL		C1403	9
C0102	9	SAPVPASPL		C0302	9	TAMPKLLSY		C0303	9	FVALPGVAV		C0304	9	FTIEVERAL		C0701	9	YAAPHFFHL		C0702	9	SYHSYVIGF						C0801	9	KPMKSVLVV		C0802	9	HVDVAGNVV		C1202	9	NAFSGVMML		C1203	9	IAAMPLISL		C1402	9	SFISFANSR		C1403	9
C0102	9	SAPVPASTL		C0302	9	TARPPGYEF		C0303	9	FVAPPTAAV		C0304	9	FTIFRTISV		C0701	9	YGSPGILEF		C0702	9	SYIGLGHIY						C0801	9	KQFVQWDEL		C0802	9	HVDVSSDSL		C1202	9	NAHYPKQSF		C1203	9	IAAPFTSKL		C1402	9	SFISVIKEM		C1403	9
C0102	9	SAPVPFTVL		C0302	9	TARYIYISY		C0303	9	FVDEGIKTL		C0304	9	FTIPHTQEA		C0701	9	YQVGVHYEL		C0702	9	SYKDSTLIM						C0801	9	KQWLMTEAL		C0802	9	HVEKPPAAL		C1202	9	NAIEGLTEY		C1203	9	IAASYVKYL		C1402	9	SFLAAAETL		C1403	9
C0102	9	SAPVSVSAV		C0302	9	TAYDNFVEL		C0303	9	FVEEEEHFL		C0304	9	FTIVSPLDI		C0701	9	YRAPGTPTY		C0702	9	SYKGHVDIL						C0801	9	KSCDLLLFL		C0802	9	HWDPQEVTL		C1202	9	NAIGVAATM		C1203	9	IAFEFPVLV		C1402	9	SFLATGSNL		C1403	9
C0102	9	SFEPTTVEL		C0302	9	TILGGLNEF		C0303	9	FVFETPFTL		C0304	9	FTLDVMKEL		C0701	9	YRAQPSVSL		C0702	9	SYLENPTSY						C0801	9	KSDPSIVRL		C0802	9	IADATVRSL		C1202	9	NAIKASLPH		C1203	9	IAFFDVRTF		C1402	9	SFLATITSF		C1403	9
C0102	9	SFPHPLPSL		C0302	9	TSFKHFIFF		C0303	9	FVFPGELLL		C0304	9	FTLPMMSTL		C0701	9	YRHDAVKIL		C0702	9	SYLEYQKVM						C0801	9	KSEGNHPAL		C0802	9	IADDFAAFV		C1202	9	NAINITSAL		C1203	9	IAFFTTASV		C1402	9	SFLDLARNI		C1403	9
C0102	9	SFQPTVVSL		C0302	9	TSPEAFLAL		C0303	9	FVHAQCLEL		C0304	9	FTLSHITQL		C0701	9	YRHPDPREL		C0702	9	SYNDYVREF						C0801	9	KSNTLPISL		C0802	9	IADDFIESV		C1202	9	NAIQTMCPH		C1203	9	IAFGFHQLY		C1402	9	SFLEDARAY		C1403	9
C0102	9	SFSPGNSSL		C0302	9	TSSPSILTL		C0303	9	FVHDLVLYL		C0304	9	FTLVGKVLL		C0701	9	YRNAYTMVL		C0702	9	SYNPVTHIY						C0801	9	KSYDDAESL		C0802	9	IADEEQKAL		C1202	9	NAISGPNEF		C1203	9	IAFHFRVYF		C1402	9	SFLEKTAVL		C1403	9
C0102	9	SGPAAAATL		C0302	9	TVPVRLSSL		C0303	9	FVHPKPVSL		C0304	9	FTMDPKLSA		C0701	9	YRNEFTAWY		C0702	9	SYPDFLHKM						C0801	9	KTDEMHTAL		C0802	9	IADEGTWTL		C1202	9	NAISVTTSY		C1203	9	IAFHSAVSL		C1402	9	SFLETNVPL		C1403	9
C0102	9	SGPAPRCEL		C0302	9	TVQPHFLEF		C0303	9	FVIDLQTRL		C0304	9	FTMKTVLML		C0701	9	YRNKFTQKY		C0702	9	SYPDFLRMM						C0801	9	KTPDFILQV		C0802	9	IADEGTYTL		C1202	9	NAITLPEEF		C1203	9	IAFPFRHDL		C1402	9	SFLPSGSEM		C1403	9
C0102	9	SGPASGHAL		C0302	9	VAAPLLSAY		C0303	9	FVIETARQL		C0304	9	FTNDKIINL		C0701	9	YRNPCYVSY		C0702	9	SYPDIHFDM						C0801	9	KTTTPGPSL		C0802	9	IADFGFSNL		C1202	9	NAKAQTPIF		C1203	9	IAFPKAEEL		C1402	9	SFMDPASAL		C1403	9
C0102	9	SGPERILSI		C0302	9	VAAPQLPVL		C0303	9	FVIGNGKNL		C0304	9	FTNGQTVNL		C0701	9	YRPAYLVTL		C0702	9	SYPGGQLVF						C0801	9	KTVDNFVAL		C0802	9	IADFMTTNV		C1202	9	NAKCPNLEF		C1203	9	IAFPSANEV		C1402	9	SFMDVSNPF		C1403	9
C0102	9	SGPGPAAAL		C0302	9	VAFGSHMSF		C0303	9	FVIPVVQAL		C0304	9	FTNPWTKEL		C0701	9	YRTDMIQAL		C0702	9	SYPGSSYIF						C0801	9	KVADLVLML		C0802	9	IADFPGLHL		C1202	9	NAKGYTIPL		C1203	9	IAFPTSISV		C1402	9	SFMEGAIIY		C1403	9
C0102	9	SGPRPGLSL		C0302	9	VAFPSSSVY		C0303	9	FVIQPFSPL		C0304	9	FTNRTVLEL		C0701	9	YSFGGCHRY		C0702	9	SYPNVFLVF						C0801	9	KVDEAVAVL		C0802	9	IADGGFTEL		C1202	9	NAKLKILEH		C1203	9	IAFQQAQYI		C1402	9	SFMGMVISH		C1403	9
C0102	9	SGPVAANVL		C0302	9	VAGPNIAAI		C0303	9	FVMAPTSFL		C0304	9	FTSEKFLVM		C0701	9	YSTPHAFTF		C0702	9	SYPTTTISY						C0801	9	KVVDPDHPL		C0802	9	IADGGTPDI		C1202	9	NAMDFSSVF		C1203	9	IAFSRPVKY		C1402	9	SFMIMKTNF		C1403	9
C0102	9	SGPVPGTAI		C0302	9	VAIAGLMEV		C0303	9	FVMEGVKNL		C0304	9	FTSLPGSTM		C0701	9	YTSDYFISY		C0702	9	SYPYFVIQY						C0801	9	LAAARLAAA		C0802	9	IADGLPVAV		C1202	9	NARPAVASY		C1203	9	IAFWGVRSM		C1402	9	SFMSGADSF		C1403	9
C0102	9	SIAEQAHEL		C0302	9	VAINRLLSM		C0303	9	FVMETFVHL		C0304	9	FTSPFCLQV		C0701	9	YTTDFIYQL		C0702	9	SYQDAAFTY						C0801	9	LAADCAHEL		C0802	9	IADHYMQVL		C1202	9	NASPVISSV		C1203	9	IAHVKPSIM		C1402	9	SFMYAHLAF		C1403	9
C0102	9	SIAKQTSSL		C0302	9	VAIPVSIFY		C0303	9	FVNPHVSSF		C0304	9	FTTGAIKDL						C0702	9	SYRDAISMY						C0801	9	LAADIHQAL		C0802	9	IADIIRTCL		C1202	9	NATKARIPF		C1203	9	IAIDWEPEM		C1402	9	SFNKMSIEY		C1403	9
C0102	9	SIFASGSEL		C0302	9	VAKWATVTF		C0303	9	FVNPSLRVL		C0304	9	FTTHVMNLL						C0702	9	SYRDSYDSY						C0801	9	LAAGPSAAA		C0802	9	IADIVTSVF		C1202	9	NAVAFLSSF		C1203	9	IAIEKIRLL		C1402	9	SFPAHRAVL		C1403	9
C0102	9	SIFSGAASL		C0302	9	VALDFEQEM		C0303	9	FVNPVQVVL		C0304	9	FTVKLPVAL						C0702	9	SYRDSYESY						C0801	9	LAAHIPLFL		C0802	9	IADKTENTL		C1202	9	NAVHWQPVF		C1203	9	IAIGKVLKL		C1402	9	SFPENLRHL		C1403	9
C0102	9	SILTTHTTL		C0302	9	VALLRVTPF		C0303	9	FVPGTTAVL		C0304	9	FTVMPGQTL						C0702	9	SYREAVFKM						C0801	9	LAAPVISVL		C0802	9	IADLAHLLL		C1202	9	NAYSSPSVV		C1203	9	IAIIRPSIV		C1402	9	SFPEVFTTY		C1403	9
C0102	9	SINGDLMEL		C0302	9	VALPMVLVL		C0303	9	FVQFASQEI		C0304	9	FTVNPKGEL						C0702	9	TAPQGNVDL						C0801	9	LAASVFTCL		C0802	9	IADLDALDV		C1202	9	NAYTGIVLL		C1203	9	IAILIPVVF		C1402	9	SFPFVSKTL		C1403	9
C0102	9	SINQTTLEL		C0302	9	VALPPGLAV		C0303	9	FVSPLVKYL		C0304	9	FTVNQQPFL						C0702	9	TFRDVAIEF						C0801	9	LAATPHSLP		C0802	9	IADLGSTSI		C1202	9	NIICGITSV		C1203	9	IAINHTIIT		C1402	9	SFPHMVLSL		C1403	9
C0102	9	SIPAFLSSL		C0302	9	VALPVFLVI		C0303	9	FVSSFMSEL		C0304	9	FTVPANQAF						C0702	9	TFRDVVIEF						C0801	9	LADDSVRSL		C0802	9	IADLISSFL		C1202	9	NIKFIGELF		C1203	9	IAIPFLIKL		C1402	9	SFPHPLPSL		C1403	9
C0102	9	SIPALTATL		C0302	9	VAMIYPLEY		C0303	9	FVTEEIIPL		C0304	9	FTVPFYKQL						C0702	9	TKIDVSYEY						C0801	9	LADEAFFSV		C0802	9	IADLMEEKF		C1202	9	NIKSPALAF		C1203	9	IAIPVTVAF		C1402	9	SFPHTTPSM		C1403	9
C0102	9	SIPDFPMHL		C0302	9	VANPAFLKY		C0303	9	FVTKPNSAL		C0304	9	FTVPHTHVF						C0702	9	TKQNSVLLL						C0801	9	LADETLLKV		C0802	9	IADLPSTQL		C1202	9	NIRDQTISY		C1203	9	IAISRTPVL		C1402	9	SFPIFISAL		C1403	9
C0102	9	SIPDIKTAF		C0302	9	VANPNSAIF		C0303	9	FVTSSHLQL		C0304	9	FTVPKNRSL						C0702	9	TRAQWFYEY						C0801	9	LADGLKVVL		C0802	9	IADLSHEAI		C1202	9	NIREIEIDY		C1203	9	IAKDVCTFL		C1402	9	SFPQLRATM		C1403	9
C0102	9	SIPDVNVNL		C0302	9	VANVFLEAY		C0303	9	FVVERQPCM		C0304	9	FTVPQIIEM						C0702	9	TRIGYHISL						C0801	9	LADGSIAVL		C0802	9	IADLVSKEL		C1202	9	NISSGHVPH		C1203	9	IALQYPVYW		C1402	9	SFPQPAAVY		C1403	9
C0102	9	SIPERPAQL		C0302	9	VAPLPRSAL		C0303	9	FVVETQPCM		C0304	9	FTVRPGELL						C0702	9	TRLYPVFFL						C0801	9	LADGVPVAL		C0802	9	IADLVTSVL		C1202	9	NLKAPSRHY		C1203	9	IAMDLILKM		C1402	9	SFPVNYKSL		C1403	9
C0102	9	SIPLAFACL		C0302	9	VAPVAQVAL		C0303	9	FVVPNQKEL		C0304	9	FTVTVPKDL						C0702	9	TRMRHVISY						C0801	9	LADHTVHVL		C0802	9	IADLVVAVF		C1202	9	NLKSHILTH		C1203	9	IARLPSSTL		C1402	9	SFQDFVSHF		C1403	9
C0102	9	SIPLANESL		C0302	9	VARPDVVEM		C0303	9	FVVPNQKRL		C0304	9	FTVTVPKEL						C0702	9	TRNDYVMMY						C0801	9	LADPGIITI		C0802	9	IADMDFSAL		C1202	9	NQIPFIIQY		C1203	9	IASAIVNEL		C1402	9	SFQFAHLEF		C1403	9
C0102	9	SIPTKALEL		C0302	9	VARPLSTAL		C0303	9	FVVPYGTPL		C0304	9	FTYGLHMIL						C0702	9	TRNNFAVGY						C0801	9	LADPHAQLL		C0802	9	IADMGFARL		C1202	9	NSFGSPLEF		C1203	9	IASDIVSRF		C1402	9	SFQGMVTSF		C1403	9
C0102	9	SIQTSVNAL		C0302	9	VARPVFTEY		C0303	9	FVYENPISL		C0304	9	FTYKGLRAL						C0702	9	TRNPLVAVY						C0801	9	LADRNVTVL		C0802	9	IADPDQPVL		C1202	9	NSRAPTTTM		C1203	9	IASFILLRL		C1402	9	SFSEFTSSL		C1403	9
C0102	9	SISSPVLSL		C0302	9	VAVDGLNQL		C0303	9	FVYGESVEL		C0304	9	FVADVRLIF						C0702	9	TRNPVSEEL						C0801	9	LADVIIHEI		C0802	9	IADPIVLAL		C1202	9	NSRGIWLSY		C1203	9	IASHLHIHV		C1402	9	SFSPGAGAF		C1403	9
C0102	9	SITATTQAL		C0302	9	VAVHVFSEF		C0303	9	FVYPFGATL		C0304	9	FVAEGGPEL						C0702	9	TRPAAQPSF						C0801	9	LADVTHLLL		C0802	9	IADPNIAKL		C1202	9	NSSPVINHL		C1203	9	IASPQLLRV		C1402	9	SFVDQVREI		C1403	9
C0102	9	SLIEQTTAL		C0302	9	VAVPVAVTF		C0303	9	FYILTSKEL		C0304	9	FVAETHIVL						C0702	9	TRPDMIRIL						C0801	9	LAFPGEMLL		C0802	9	IADPRGNTL		C1202	9	NTIDPSHPM		C1203	9	IASPVIAAV		C1402	9	SFVDSVGVM		C1403	9
C0102	9	SLPAEVGCL		C0302	9	VAVSMLNVY		C0303	9	FYVPFAKAL		C0304	9	FVALPGVAV						C0702	9	TRPEKALIL						C0801	9	LAFSRALEL		C0802	9	IADQRNFIF		C1202	9	NTIDSTSSF		C1203	9	IASPVQPVL		C1402	9	SFVIRALGF		C1403	9
C0102	9	SLPAEVHSL		C0302	9	VAYMNPIAM		C0303	9	GAAAWARPL		C0304	9	FVAPPTAAV						C0702	9	TRPPALLLL						C0801	9	LAIDAIHQL		C0802	9	IADRGAEYV		C1202	9	NTKEPPLSL		C1203	9	IASTILRLI		C1402	9	SFVWHALDY		C1403	9
C0102	9	SLPAPSKAL		C0302	9	VAYPCAILY		C0303	9	GAAPCRLAL		C0304	9	FVDEGIKTL						C0702	9	TRPPEPRHI						C0801	9	LAIDTEERL		C0802	9	IADRLGLEL		C1202	9	NVIRDAVTY		C1203	9	IASWLVVTV		C1402	9	SMPLYAVMY		C1403	9
C0102	9	SLPDGGSCL		C0302	9	VAYVSSVAL		C0303	9	GAAVPIYVI		C0304	9	FVEEEEHFL						C0702	9	TRPQQLVCF						C0801	9	LAIESANEL		C0802	9	IADRLNVEF		C1202	9	NVKEAPTEY		C1203	9	IATEIILEI		C1402	9	SPGAAVVML		C1403	9
C0102	9	SLPDIKVYL		C0302	9	VAYWRQAGL		C0303	9	GAFQPGRPL		C0304	9	FVFPGELLL						C0702	9	TRSAIILHL						C0801	9	LAIGPCKSL		C0802	9	IADRPPPVI		C1202	9	NVNVIISTY		C1203	9	IATGHLMSV		C1402	9	SWPTYPQLY		C1403	9
C0102	9	SLPENYKQL		C0302	9	VEKTAIFAF		C0303	9	GAGPVLEAF		C0304	9	FVHDLVLYL						C0702	9	TRSFYKHIL						C0801	9	LAIHGMETL		C0802	9	IADSNPMVV		C1202	9	NVRTATESF		C1203	9	IATPFIKLF		C1402	9	SYENMVTEI		C1403	9
C0102	9	SLPGPRKPL		C0302	9	VIFEGFFAH		C0303	9	GAHFSVSSL		C0304	9	FVHPKPVSL						C0702	9	TRSPHIETY						C0801	9	LAIVPVNTL		C0802	9	IADTGANVV		C1202	9	PAGVGPGLS		C1203	9	IAVALPVVY		C1402	9	SYFGSFSSL		C1403	9
C0102	9	SLPIATQEL		C0302	9	VILPPLSPY		C0303	9	GAIARPACL		C0304	9	FVIDLQTRL						C0702	9	TRTIYQFHY						C0801	9	LALAIAQEL		C0802	9	IADTVPKYL		C1202	9	PIRPDIVNF		C1203	9	IAVDMTQHL		C1402	9	SYFMATNSL		C1403	9
C0102	9	SLPNGTASL		C0302	9	VIRDFAGPY		C0303	9	GAIPAFISL		C0304	9	FVIETARQL						C0702	9	TRTPVAKEL						C0801	9	LALFPGVAL		C0802	9	IADVAPSAI		C1202	9	QAADTVVIF		C1203	9	IAVEFCHVT		C1402	9	SYFPKILTF		C1403	9
C0102	9	SLPNVFSAL		C0302	9	VNNPHFLIM		C0303	9	GALAVFPSL		C0304	9	FVIGNGKNL						C0702	9	TRVDTILEF						C0801	9	LAMEPTPEL		C0802	9	IADVNKPII		C1202	9	QAASILTKF		C1203	9	IAVGLVPQY		C1402	9	SYFSSTKTL		C1403	9
C0102	9	SLPRDRQAL		C0302	9	VSAGIQTSF		C0303	9	GALFISPAL		C0304	9	FVINEVCEM						C0702	9	TRVKAVRIL						C0801	9	LAMRPLASL		C0802	9	IAEAVRTTL		C1202	9	QAFPGGHSM		C1203	9	IAVGTVIRY		C1402	9	SYGAAGLAF		C1403	9
C0102	9	SLPSYVSVL		C0302	9	VSFHFSNYF		C0303	9	GALPYFSEM		C0304	9	FVIPVVQAL						C0702	9	TRYDLYHTF						C0801	9	LANIIYYSL		C0802	9	IAEDPKVFL		C1202	9	QAIQWILHY		C1203	9	IAVHVVRVL		C1402	9	SYHPSGLSL		C1403	9
C0102	9	SLVTGITAL		C0302	9	VSHFFSLPF		C0303	9	GASPIGPTL		C0304	9	FVLDKVPFL						C0702	9	TRYQGVNLY						C0801	9	LAQAMETAL		C0802	9	IAEGPETKI		C1202	9	QAMGKTSFF		C1203	9	IAVNAVLTV		C1402	9	SYHSYVIGF		C1403	9
C0102	9	SMITGVAAL		C0302	9	VSSFVFLRF		C0303	9	GATPVFIPL		C0304	9	FVLGRLLTL						C0702	9	TSPEAFLAL						C0801	9	LASEIYDIL		C0802	9	IAEIGSLSL		C1202	9	QASHPSAHF		C1203	9	IAVSIVRAL		C1402	9	SYIAMDTEF		C1403	9
C0102	9	SMNTASHSL		C0302	9	VSYEFKFPF		C0303	9	GATPVSLAL		C0304	9	FVMEGVKNL						C0702	9	TYGDAGLTY						C0801	9	LASEPQEVL		C0802	9	IAEIYETEL		C1202	9	QAVAIFTVY		C1203	9	IAYDNIKVV		C1402	9	SYIIGTSSV		C1403	9
C0102	9	SMPEFMANL		C0302	9	VTRPTGVSF		C0303	9	GAVDPLLAL		C0304	9	FVMETFVHL						C0702	9	TYGERVVAF						C0801	9	LASPVSPEL		C0802	9	IAEQYHTVL		C1202	9	QAYAVPYQY		C1203	9	IAYDVTYSL		C1402	9	SYISEVKEV		C1403	9
C0102	9	SMPWNVDTL		C0302	9	VTVPPGPSL		C0303	9	GAVEKGVPL		C0304	9	FVNPHVSSF						C0702	9	TYKDPITEF						C0801	9	LATDVQTVA		C0802	9	IANLEPVSL		C1202	9	QIPEIKQTL		C1203	9	IAYFHPQKL		C1402	9	SYIYGAQHL		C1403	9
C0102	9	SMPYHVCTL		C0302	9	VTVRPGLAM		C0303	9	GAVPIFIEL		C0304	9	FVNPSLRVL						C0702	9	TYKDYVDLF						C0801	9	LATRAIPEL		C0802	9	IFDRVLTEL		C1202	9	QIRDVPVLY		C1203	9	IAYPHLRIR		C1402	9	SYLDFTNPK		C1403	9
C0102	9	SPLPAGNAL		C0302	9	VTYSFRQSF		C0303	9	GAVSPFGML		C0304	9	FVNPVQVVL						C0702	9	TYPEVVRMV						C0801	9	LAVDKSASL		C0802	9	IGDEAATHL		C1202	9	QLGPVGGVF		C1203	9	IAYPKAVTM		C1402	9	SYLFSHVPL		C1403	9
C0102	9	SSLPAGAAL		C0302	9	VTYVPVTTF		C0303	9	GAYKYIQEL		C0304	9	FVNSQEWTL						C0702	9	TYQVLAVTF						C0801	9	LAVDPNRAV		C0802	9	IGDLVKSTL		C1202	9	QSVHFQTIF		C1203	9	IAYQKQVIR		C1402	9	SYLIARIAL		C1403	9
C0102	9	SSLPVGPVL		C0302	9	VVFFNKRVY		C0303	9	GAYVPSLAL		C0304	9	FVSDPLSDL						C0702	9	TYRAIAETY						C0801	9	LAVPDMSSL		C0802	9	IGDLVNIDL		C1202	9	QVKNPPHTY		C1203	9	IAYSRPVYF		C1402	9	SYLITSVEL		C1403	9
C0102	9	SSPATESAL		C0302	9	VVKMPSGEF		C0303	9	GDVFYLHSR		C0304	9	FVSPLVKYL						C0702	9	TYRLFAVVY						C0801	9	LAVRDVSEL		C0802	9	IGDPEVLEI		C1202	9	QVYGGVTYY		C1203	9	IFYEFRSYY		C1402	9	SYLPEAGQY		C1403	9
C0102	9	SSPEFSKTL		C0302	9	VVKPPGSSL		C0303	9	GFAGDDAPR		C0304	9	FVSSFMSEL						C0702	9	TYSEFAREL						C0801	9	LAVTDTGAL		C0802	9	IGDPITTCL		C1202	9	RAAAKLLSH		C1203	9	IGMPVEKRY		C1402	9	SYLPHAPPF		C1403	9
C0102	9	SSPEKAASL		C0302	9	VVNGRVLEL		C0303	9	GIGTVPVGR		C0304	9	FVTEEIIPL						C0702	9	TYYGSFVTR						C0801	9	LAWLDEHTL		C0802	9	IGDPNLEFV		C1202	9	RAADLLAVH		C1203	9	IGVDFALKV		C1402	9	SYLPLAHMF		C1403	9
C0102	9	SSPERDFPL		C0302	9	VVPDQLMAF		C0303	9	GIIDPGSTV		C0304	9	FVTKPNSAL						C0702	9	VAPGKRPAL						C0801	9	LAYCQSEEL		C0802	9	IGDSGVPAL		C1202	9	RAADVLVYL		C1203	9	IGVEHVVVY		C1402	9	SYLTSASSL		C1403	9
C0102	9	SSPGAVAGL		C0302	9	VVPTAILAF		C0303	9	GIIHVISRP		C0304	9	FVTSSHLQL						C0702	9	VAPPGCSHL						C0801	9	LAYHLAVVL		C0802	9	IGDSHCLAL		C1202	9	RAAEILYYF		C1203	9	IGYPITLYL		C1402	9	SYMDPMNEY		C1403	9
C0102	9	SSPGHGSPL		C0302	9	VVVDPIQSV		C0303	9	GIIRPGTAF		C0304	9	FVVDHCPYM						C0702	9	VAPPVSGDL						C0801	9	LAYLQRIAL		C0802	9	IGDVATQYF		C1202	9	RAAEIRETL		C1203	9	IGYPMPTGY		C1402	9	SYMESVVTF		C1403	9
C0102	9	SSPLKSHPL		C0302	9	VVYPWTQRF		C0303	9	GILAIFRAL		C0304	9	FVVDRLIAL						C0702	9	VAPTSGPAL						C0801	9	LGFERFHAL		C0802	9	IGPPLEKPV		C1202	9	RAAPFSLEY		C1203	9	IGYSSPLTL		C1402	9	SYMPTVSHL		C1403	9
C0102	9	SSPLRKQEL		C0302	9	WAMEQVLEF		C0303	9	GPPPPGKPQ		C0304	9	FVVERQPCM						C0702	9	VAPVAQVAL						C0801	9	LIDDLQHCL		C0802	9	IIDAPALAL		C1202	9	RAFCTGQEL		C1203	9	IIFETPLRV		C1402	9	SYMWTINNF		C1403	9
C0102	9	SSPLVVVSV		C0302	9	WARPLSVSF		C0303	9	GQLNADLRK		C0304	9	FVVPDTVDM						C0702	9	VFRDLVIKY						C0801	9	LIKPESKVA		C0802	9	IIDDAEFEL		C1202	9	RAFDCPSSF		C1203	9	IIPSWPLKV		C1402	9	SYNDYLRAA		C1403	9
C0102	9	SSPMATTAA		C0302	9	WGVPIEKIY		C0303	9	GSTTVFHSL		C0304	9	FVVPNQKEL						C0702	9	VHADVYRVL						C0801	9	LIVEPSREL		C0802	9	IIDDDVPSF		C1202	9	RAFEYEIRF		C1203	9	IIQSIRMGM		C1402	9	SYNDYVREF		C1403	9
C0102	9	SSPPLRHAV		C0302	9	WQNPHMLFL		C0303	9	GTAPPTLAL		C0304	9	FVVPNQKRL						C0702	9	VHAFPELFL						C0801	9	LLCNLDIIL		C0802	9	IIDDGDSNL		C1202	9	RAHAAEVSF		C1203	9	IIYGDPVTF		C1402	9	SYNLTVREL		C1403	9
C0102	9	SSPPPHPQL		C0302	9	WSLPATATM		C0303	9	GTIPWFMEI		C0304	9	FVVPRAALL						C0702	9	VHPPPTTTY						C0801	9	LLPPRAATL		C0802	9	IIDDPNLVV		C1202	9	RAIEIYTDM		C1203	9	IIYPTPKVV		C1402	9	SYPDAILQA		C1403	9
C0102	9	SSPQAGSSL		C0302	9	YAAGAKLVL		C0303	9	GVIKVFNDM		C0304	9	FVVPYGTPL						C0702	9	VHVDVHSHY						C0801	9	LLSDTKLEL		C0802	9	IIDDRNREL		C1202	9	RAIENIDTL		C1203	9	ILFSGVHFY		C1402	9	SYPDFLRMM		C1403	9
C0102	9	SSPSSKTSF		C0302	9	YAALHGEFY		C0303	9	HAAHIISEL		C0304	9	FVYENPISL						C0702	9	VKSDVEINY						C0801	9	LLSDVRFVL		C0802	9	IIDDSDSNL		C1202	9	RAKDIKSSL		C1203	9	ILPPFIWTL		C1402	9	SYPDNFLHI		C1403	9
C0102	9	SSPSSLRAL		C0302	9	YAALNLAAL		C0303	9	HAASVFLTL		C0304	9	FVYGESVEL						C0702	9	VKSDYVVKY						C0801	9	LMQLLQESL		C0802	9	IIDDVDSFL		C1202	9	RAKQPPSTF		C1203	9	IQAAIVRIM		C1402	9	SYPFDFLEF		C1403	9
C0102	9	SSPSYENSL		C0302	9	YAANPGQLF		C0303	9	HACGVIATI		C0304	9	FVYPFGATL						C0702	9	VKTDTVLIL						C0801	9	LPASETPKA		C0802	9	IIDDVMKEL		C1202	9	RANEPCTSF		C1203	9	IQFKKPIIV		C1402	9	SYPHHATQL		C1403	9
C0102	9	SSPTFLRAL		C0302	9	YAAPHFFHL		C0303	9	HADDSFLVL		C0304	9	FWIPYIHNL						C0702	9	VRADCHYRY						C0801	9	LPKPPGRGV		C0802	9	IIDEFEQKL		C1202	9	RANPFNTPH		C1203	9	IQYIRPVFV		C1402	9	SYPLFSQEF		C1403	9
C0102	9	SSPTVNTTL		C0302	9	YAAPPHVIH		C0303	9	HAFWGGSVV		C0304	9	FYILTSKEL						C0702	9	VRAEVQHQL						C0801	9	LPLSLLKTA		C0802	9	IIDETMAQL		C1202	9	RAQDKVHYY		C1203	9	ISAELIRSL		C1402	9	SYPSVVSTL		C1403	9
C0102	9	SSPVADIAV		C0302	9	YAAPQLRSI		C0303	9	HAIMRSPQM		C0304	9	FYVPFAKAL						C0702	9	VRANLPQSF						C0801	9	LPRKPVAGA		C0802	9	IIDGKIFCV		C1202	9	RAQPRGAVY		C1203	9	ISAPLVKTL		C1402	9	SYQDLVKCF		C1403	9
C0102	9	SSPVSMVHL		C0302	9	YAAPWFLTL		C0303	9	HAIPPTLAM		C0304	9	GAAAPLLPM						C0702	9	VRANVPEEL						C0801	9	LPWQGLKAA		C0802	9	IIDKSGSTI		C1202	9	RARELLVSY		C1203	9	ISCPKPSII		C1402	9	SYQEHVKQL		C1403	9
C0102	9	SSPVTNQAI		C0302	9	YAAQNLLSH		C0303	9	HAMQFPAEL		C0304	9	GAAAWARPL						C0702	9	VRAWVVFKL						C0801	9	LSAPLIGAL		C0802	9	IIDKSGSTV		C1202	9	RARPATDSF		C1203	9	ISFPAPLYI		C1402	9	SYQILTRQL		C1403	9
C0102	9	SSPVTVHTL		C0302	9	YAAQQLPSL		C0303	9	HAMVILLTL		C0304	9	GAADPGFTM						C0702	9	VRDHWVHVL						C0801	9	LSDDHVLIL		C0802	9	IIDLQANPL		C1202	9	RASPLFSQH		C1203	9	ISFPDPKML		C1402	9	SYSSIASEF		C1403	9
C0102	9	SSPVVATTM		C0302	9	YAAYPLTEV		C0303	9	HASDRIIAL		C0304	9	GAFQPGRPL						C0702	9	VRENVPRVL						C0801	9	LSDETLLEI		C0802	9	IIDQEVQTL		C1202	9	RASWIAQVF		C1203	9	ISKSPWTCL		C1402	9	SYYAVAHAV		C1403	9
C0102	9	SSPVVHQSL		C0302	9	YAFDFARQS		C0303	9	HAVGPSTSL		C0304	9	GAHFSVSSL						C0702	9	VRFDQVTVY						C0801	9	LSDPQVHTV		C0802	9	IIDRAITSL		C1202	9	RAVEAQSCY		C1203	9	ISRDKPITF		C1402	9	SYYAYVVEL		C1403	9
C0102	9	SSPYSPAYL		C0302	9	YAFGGGCEL		C0303	9	HAVHVALVL		C0304	9	GAINHVLQL						C0702	9	VRKKFVTEL						C0801	9	LSHLLAIGL		C0802	9	IIDRTNTTL		C1202	9	RAVEPAQQY		C1203	9	ISREHPWEV		C1402	9	SYYEEALEL		C1403	9
C0102	9	SSPYSTDTL		C0302	9	YAFIEFASF		C0303	9	HAVSDPSIL		C0304	9	GAIPAFISL						C0702	9	VRKSIARVL						C0801	9	LSHLQQDSL		C0802	9	IIDSTNIIF		C1202	9	RAVWHTNVF		C1203	9	ISSGLILSV		C1402	9	SYYKDALRF		C1403	9
C0102	9	STAIREISL		C0302	9	YAFKFFDTY		C0303	9	HAWSGALEM		C0304	9	GAIPVFFSF						C0702	9	VRNAVTQEF						C0801	9	LSHSLLVTL		C0802	9	IIDTACEVL		C1202	9	RAYGRDIVE		C1203	9	ISSHIPLII		C1402	9	SYYSPSIGF		C1403	9
C0102	9	STPDHTSTL		C0302	9	YAFNMKATV		C0303	9	HIIAGAGEL		C0304	9	GAISKIFVL						C0702	9	VRNDIYITL						C0801	9	LSLFIDDKL		C0802	9	IIDTPISEM		C1202	9	RIADISQVY		C1203	9	ISSPVVTSL		C1402	9	SYYTVAHAI		C1403	9
C0102	9	STPEYTVEL		C0302	9	YAFPKAVSV		C0303	9	HIIEDPCTL		C0304	9	GALAVFPSL						C0702	9	VRNEHFWTL						C0801	9	LSSPPTESL		C0802	9	IIEEEFVSL		C1202	9	RIHFPLATY		C1203	9	ISTPVIRTF		C1402	9	TFGERVVAF		C1403	9
C0102	9	STPSGYLEL		C0302	9	YAFPKSITV		C0303	9	HLDEAIHVL		C0304	9	GALFISPAL						C0702	9	VRNNVIIVM						C0801	9	LSYLEKEAL		C0802	9	IIEPTSPCL		C1202	9	RIKAINTFF		C1203	9	ISVDGVVYY		C1402	9	TFIDDISAY		C1403	9
C0102	9	STPSPTSSL		C0302	9	YAFQFVGAY		C0303	9	HSALPNQSL		C0304	9	GALPYFSEM						C0702	9	VRNPEAEEM						C0801	9	LTDANIHEL		C0802	9	ILDAAGANL		C1202	9	RIKDKVVTH		C1203	9	ISVERVIEY		C1402	9	TFIDPRIPL		C1403	9
C0102	9	STPTGYGTL		C0302	9	YAFVRPVIL		C0303	9	HSDEYIKFL		C0304	9	GAMDLLREL						C0702	9	VRNYEQWQL						C0801	9	LTDDTLQEL		C0802	9	ILDDATSAL		C1202	9	RIKDLGQFY		C1203	9	ITAEILREL		C1402	9	TFINNVISH		C1403	9
C0102	9	SVECATQAL		C0302	9	YAGYIPQAF		C0303	9	HSHLLKTPL		C0304	9	GANHISPFL						C0702	9	VRPAEPAFL						C0801	9	LTDGHPLTL		C0802	9	ILDDKSKEL		C1202	9	RIKETKEVY		C1203	9	ITFPGIKLI		C1402	9	TFLEAGVEM		C1403	9
C0102	9	SVIPDREYL		C0302	9	YAHIYHQHF		C0303	9	HSIGSYFTL		C0304	9	GASPIGPTL						C0702	9	VRPDDAIEL						C0801	9	LTDQTLIYL		C0802	9	ILDDVAMVL		C1202	9	RIKKDPVPY		C1203	9	ITFPGLHEL		C1402	9	TFMPVASGL		C1403	9
C0102	9	SVIQHTNSL		C0302	9	YAIDNPLHY		C0303	9	HSIIPRGSL		C0304	9	GATKLFLIL						C0702	9	VRPDNTYEV						C0801	9	LTTEVHPEL		C0802	9	ILDEAERSL		C1202	9	RIKPNAITY		C1203	9	ITFPIIVHF		C1402	9	TFNEDVQAL		C1403	9
C0102	9	SVLAAANSV		C0302	9	YAIDSVLEV		C0303	9	HSLLPASNL		C0304	9	GATPVSLAL						C0702	9	VRPDTVRNL						C0801	9	LTVEPGASL		C0802	9	ILDEATSAL		C1202	9	RIPSFVTEL		C1203	9	ITGPLIRIL		C1402	9	TFNNPTTEF		C1403	9
C0102	9	SVPAFASSL		C0302	9	YAIESQLQL		C0303	9	HTIVPGQVL		C0304	9	GAVDPLLAL						C0702	9	VRPHIDISF						C0801	9	LVAPPLPAA		C0802	9	ILDELVKSL		C1202	9	RIREDIAKY		C1203	9	ITTDCLQIL		C1402	9	TFPDIIRNY		C1403	9
C0102	9	SVPAPTNVL		C0302	9	YAIEVDPVL		C0303	9	HTSEHFSFL		C0304	9	GAVPIFIEL						C0702	9	VRPLATLSY						C0801	9	LVDDHFVEL		C0802	9	ILDEPTNHL		C1202	9	RLKNPTVEY		C1203	9	ITTTINPRF		C1402	9	TFPLQVLGF		C1403	9
C0102	9	SVPDSVTPL		C0302	9	YAIFRILLY		C0303	9	HVFIGGTPL		C0304	9	GAVSPFGML						C0702	9	VRPLLSASY						C0801	9	LVDDNYFYL		C0802	9	ILDEPTNNL		C1202	9	RMKEVGKVF		C1203	9	ITTTVTRVL		C1402	9	TFPMQCSAL		C1403	9
C0102	9	SVPDVTHHL		C0302	9	YAIGLVMRL		C0303	9	HVLEPLSSL		C0304	9	GAYKYIQEL						C0702	9	VRPLRLFVY						C0801	9	LVDENFTEL		C0802	9	ILDEVDAAL		C1202	9	RQADFVQVL		C1203	9	ITYGLPIMV		C1402	9	TFPSDITEF		C1403	9
C0102	9	SVPFAATAT		C0302	9	YAIGVSHPL		C0303	9	HVMKAMQSL		C0304	9	GAYVPSLAL						C0702	9	VRPPPGPEL						C0801	9	LVDGQIFCL		C0802	9	ILDIAGYDL		C1202	9	RQINWTVLY		C1203	9	IVADILLYV		C1402	9	TFQDKTLNF		C1403	9
C0102	9	SVPIQANAL		C0302	9	YAISAGVSL		C0303	9	IAAGIFNDL		C0304	9	GIIDPGSTV						C0702	9	VRPPQIKSL						C0801	9	MAAEPYETI		C0802	9	ILDIPTHTI		C1202	9	RSPDFASSF		C1203	9	IVATKPLYV		C1402	9	TFQSRTLAL		C1403	9
C0102	9	SVPLSALEL		C0302	9	YAISKPDIL		C0303	9	IAAGLYLLL		C0304	9	GIIEPLMNL						C0702	9	VRPPQQVVY						C0801	9	MAAPVDLEL		C0802	9	ILDISEHTL		C1202	9	RSSPPGHYY		C1203	9	IVIGIIKTV		C1402	9	TYFIVGTAM		C1403	9
C0102	9	SVPNKALEL		C0302	9	YAISKPEVL		C0303	9	IAAMPLISL		C0304	9	GIIHVISRP						C0702	9	VRPPTPREL						C0801	9	MACDTFIKI		C0802	9	ILDNPVVQL		C1202	9	RTHLPGRTY		C1203	9	IVINHVISV		C1402	9	TYGERVVAF		C1403	9
C0102	9	SVPNVHGAL		C0302	9	YAISPGLDI		C0303	9	IAAPFTSKL		C0304	9	GIIRPGTAF						C0702	9	VRPSYWLVL						C0801	9	MADGNQAQL		C0802	9	ILDPHVVLL		C1202	9	RTKDTPLSL		C1203	9	IVYPGIAVF		C1402	9	TYIGSVEPL		C1403	9
C0102	9	SVPPYGVAL		C0302	9	YAITTLHNL		C0303	9	IAAPNMKAM		C0304	9	GIVFSGSSL						C0702	9	VRPTYCLEY						C0801	9	MADKCSPTL		C0802	9	ILDQTKTEL		C1202	9	RTNAIKQTF		C1203	9	KAADFVKAF		C1402	9	TYINHVVSV		C1403	9
C0102	9	SVPQALTGL		C0302	9	YAIVRFNQY		C0303	9	IAAPTSSAL		C0304	9	GIVGSGAAL						C0702	9	VRPYCFIEF						C0801	9	MADPEVQQI		C0802	9	ILDSHAATL		C1202	9	RVFPYISVM		C1203	9	KAAGFISVL		C1402	9	TYLGVAASL		C1403	9
C0102	9	SVPSAKVSL		C0302	9	YAKDDPLEF		C0303	9	IAAVPATAM		C0304	9	GSAPWAPVL						C0702	9	VRQDVINTL						C0801	9	MADSGHYCV		C0802	9	ILDVSGNAI		C1202	9	RVKEIGSTM		C1203	9	KAAHFFSTL		C1402	9	TYLPAGQSV		C1403	9
C0102	9	SVPSAVSSL		C0302	9	YAKIVEIPF		C0303	9	IAAVTDIPL		C0304	9	GSIAPGLSV						C0702	9	VRSGYYKVL						C0801	9	MAFHQEHEV		C0802	9	ILEEPSKAL		C1202	9	RVYHAVSVM		C1203	9	KAASQILIL		C1402	9	TYLQTMVFY		C1403	9
C0102	9	SVPTDYSYL		C0302	9	YAKRPGIGL		C0303	9	IADGVFRFL		C0304	9	GTAPPTLAL						C0702	9	VRSPHPYQL						C0801	9	MAHADPTEL		C0802	9	IMDHVEESL		C1202	9	RVYPQAVYF		C1203	9	KAASVRPVL		C1402	9	TYMAMYLTY		C1403	9
C0102	9	SVPTLRSEL		C0302	9	YALELLTVY		C0303	9	IADLVSKEL		C0304	9	GTIPWFMEI						C0702	9	VRSPVVHSV						C0801	9	MAHGLFHEL		C0802	9	IQDDAVHTL		C1202	9	SAAAVFSHF		C1203	9	KAAVMVHQL		C1402	9	TYNTQVNFM		C1403	9
C0102	9	SVPVAFSHF		C0302	9	YALNHTLSV		C0303	9	IADNVFLFL		C0304	9	GVIDAYMTL						C0702	9	VRTPYTMSY						C0801	9	MAHSLATTL		C0802	9	IQDEIRSVI		C1202	9	SAADFFSHY		C1203	9	KACDYIQEL		C1402	9	TYPAGFMDV		C1403	9
C0102	9	SVPVATVEL		C0302	9	YALTAIMKL		C0303	9	IADPFFRSA		C0304	9	GVIEPNKEL						C0702	9	VRVDRDYVL						C0801	9	MAIADEVEI		C0802	9	IQDEIVDFL		C1202	9	SAADVVVVH		C1203	9	KACDYIREL		C1402	9	TYPPYVPEY		C1403	9
C0102	9	SVPVPATEL		C0302	9	YAMDELRSL		C0303	9	IADPNIAKL		C0304	9	GVISKVSTL						C0702	9	VRVEPLVTM						C0801	9	MAVIDGNVM		C0802	9	IQDFQASVL		C1202	9	SAAEIMAVL		C1203	9	KAFAEQIFY		C1402	9	TYPSLPKSL		C1403	9
C0102	9	SVPVSLQTL		C0302	9	YAMPSSTPL		C0303	9	IADSGLKIL		C0304	9	HAAHIISEL						C0702	9	VRVPVTSNL						C0801	9	MAVQPKETL		C0802	9	IQDFQSVTL		C1202	9	SAAFPGASL		C1203	9	KAFAQLFIL		C1402	9	TYPSNILSH		C1403	9
C0102	9	SVPVTKTNL		C0302	9	YANDVTRVL		C0303	9	IAEMVRHAL		C0304	9	HAASVFLTL						C0702	9	VRVPYFIDL						C0801	9	MIDDTYQCL		C0802	9	IQDLGPKEL		C1202	9	SAAGLHRAL		C1203	9	KAFARPWSL		C1402	9	TYQAMVHEL		C1403	9
C0102	9	SVPYHQAAL		C0302	9	YANEVGEAF		C0303	9	IAFPKAEEL		C0304	9	HACGVIATI						C0702	9	VSPDAKTSL						C0801	9	MIIENFEAL		C0802	9	IQDLTGLDV		C1202	9	SAAKTGVRF		C1203	9	KAFDRPSLF		C1402	9	TYQKLARAL		C1403	9
C0102	9	SVPYPTASL		C0302	9	YAQIRTIAI		C0303	9	IAFPTSISV		C0304	9	HADDSFLVL						C0702	9	VSPLATSAL						C0801	9	MQAPLLIAL		C0802	9	IQDVQSEAL		C1202	9	SAAMPGASL		C1203	9	KAFEHLQQL		C1402	9	TYQRSVLAL		C1403	9
C0102	9	SVQRADTSL		C0302	9	YAQLHSFTL		C0303	9	IAFQYSTVL		C0304	9	HAFAQPFAV						C0702	9	VYCPVQWEY						C0801	9	MSADVPLVV		C0802	9	IQDVSLESL		C1202	9	SAAMVFSAL		C1203	9	KAFEYNMQI		C1402	9	TYQVLAVTF		C1403	9
C0102	9	SVQSGNLAL		C0302	9	YAQLHSLTL		C0303	9	IAIAPNGAL		C0304	9	HAIEESVVL						C0702	9	VYFGHWVVM						C0801	9	MSCLLEVAL		C0802	9	ISDADTKEV		C1202	9	SAANIQPIF		C1203	9	KAFFAKMVV		C1402	9	TYQVQKLSL		C1403	9
C0102	9	SVQSSERPL		C0302	9	YARAKFLDY		C0303	9	IAIDGGKVL		C0304	9	HAIMRSPQM						C0702	9	VYGPLPQSF						C0801	9	MSHLLEMCV		C0802	9	ISDAGLLHL		C1202	9	SAAPEGVPL		C1203	9	KAFFRWLYV		C1402	9	TYQVYGLAL		C1403	9
C0102	9	SVSGKVSCL		C0302	9	YARDETEFY		C0303	9	IAIEALTQL		C0304	9	HAIPPTLAM						C0702	9	VYGTRLVVL						C0801	9	MSSDVFPLL		C0802	9	ISDAPINEV		C1202	9	SAAPFAQRY		C1203	9	KAFGKQSIL		C1402	9	TYSEFAREL		C1403	9
C0102	9	TAPATEQTL		C0302	9	YARLHPRAV		C0303	9	IAIEIYLKL		C0304	9	HAMQFPAEL						C0702	9	VYGVVPISL						C0801	9	MSVQPTVSL		C0802	9	ISDAPVTGM		C1202	9	SAAPFFVLF		C1203	9	KAFKGSIFV		C1402	9	TYVTEVREL		C1403	9
C0102	9	TAPGFTAEM		C0302	9	YASSPGMSL		C0303	9	IAIGSQPVL		C0304	9	HAMVILLTL						C0702	9	VYHEILIGY						C0801	9	MTCLSHPLQ		C0802	9	ISDEANSNF		C1202	9	SAAPGTASL		C1203	9	KAFLTIIIL		C1402	9	TYVTPRRPF		C1403	9
C0102	9	TAPIPGATL		C0302	9	YAVNSQFTM		C0303	9	IAIIPSKKL		C0304	9	HANPILLLV						C0702	9	VYKAFVDNY						C0801	9	MTDGAQQAL		C0802	9	ISDEECFVL		C1202	9	SAAPGVGSV		C1203	9	KAFMYPYTL		C1402	9	VANTMRTSL		C1403	9
C0102	9	TAPIRSPAL		C0302	9	YAVPALEAH		C0303	9	IAIKFGSAL		C0304	9	HASDRIIAL						C0702	9	VYKDLVLLL						C0801	9	MVDGTLLLL		C0802	9	ISDEGIAYL		C1202	9	SAAPPGLEA		C1203	9	KAFNHPATL		C1402	9	VFAPPAEAY		C1403	9
C0102	9	TAPLAICSL		C0302	9	YAVSELAGH		C0303	9	IAIKYSRTL		C0304	9	HATQAIFEI						C0702	9	VYKKSIFVF						C0801	9	MVVDIVQEL		C0802	9	ISDEVEKEL		C1202	9	SAAQPGVAF		C1203	9	KAFNLRISF		C1402	9	VFHVSNLEF		C1403	9
C0102	9	TAPLSDAVL		C0302	9	YAYATVLTF		C0303	9	IAINISRNL		C0304	9	HAVEWPVVM						C0702	9	VYNENLVHM						C0801	9	NAAAIYDLL		C0802	9	ISDHAIQEL		C1202	9	SAASLYPVL		C1203	9	KAFPEHFTY		C1402	9	VFIDEIDAI		C1403	9
C0102	9	TAPLTLESL		C0302	9	YAYFNFPEL		C0303	9	IAIPFGTAL		C0304	9	HAVHVALVL						C0702	9	VYNIYIRRY						C0801	9	NAAGVMHYL		C0802	9	ISDIANDAL		C1202	9	SAASVVSEI		C1203	9	KAFPFHIIF		C1402	9	VFIDGPLAL		C1403	9
C0102	9	TAPNTFKTL		C0302	9	YAYKDFLWF		C0303	9	IAIPFLIKL		C0304	9	HFSAYSSLI						C0702	9	VYPERSTSY						C0801	9	NAAMVFEFL		C0802	9	ISDINPRSV		C1202	9	SAATIVAKH		C1203	9	KAFPKAYLL		C1402	9	VFLEAAKAL		C1403	9
C0102	9	TAPQAEHAM		C0302	9	YAYPGVLLI		C0303	9	IAIPVTQEL		C0304	9	HIIENIVAV						C0702	9	VYPEYVIQY						C0801	9	NAANIFERL		C0802	9	ISDIPTGIP		C1202	9	SACGHTAVL		C1203	9	KAFQKIVVL		C1402	9	VFLERGEVM		C1403	9
C0102	9	TAPQGNVDL		C0302	9	YAYPYSYYY		C0303	9	IAIPVTVAF		C0304	9	HILDFSPSL						C0702	9	VYPGIAVFF						C0801	9	NACGLYHKM		C0802	9	ISDKITSEL		C1202	9	SAFDEAMSY		C1203	9	KAFQKLITV		C1402	9	VFLLDLGKV		C1403	9
C0102	9	TAPQPGSAV		C0302	9	YAYTGRLEL		C0303	9	IAISRMKFL		C0304	9	HIPVFSPAL						C0702	9	VYPGYYLTF						C0801	9	NACGLYYKL		C0802	9	ISDKQCAEL		C1202	9	SAFDRCATL		C1203	9	KAFSVVIQA		C1402	9	VFLPRALAL		C1403	9
C0102	9	TAPSALHTL		C0302	9	YFFTWDTEY		C0303	9	IAISRTPVL		C0304	9	HLDEAIHVL						C0702	9	VYPLYTIVF						C0801	9	NADAIVVKL		C0802	9	ISDLAQHYL		C1202	9	SAFPFPVTV		C1203	9	KAIDFAASL		C1402	9	VFLPRVTEL		C1403	9
C0102	9	TAPSMASVL		C0302	9	YFWPRTVPM		C0303	9	IALGEFSTL		C0304	9	HLTPVTLEL						C0702	9	VYPPIRHHL						C0801	9	NADETPICL		C0802	9	ISDLGELSF		C1202	9	SAFTNRIFF		C1203	9	KAIDVVVMV		C1402	9	VFMHVSTAY		C1403	9
C0102	9	TAPVPTTEI		C0302	9	YFYVIGSSY		C0303	9	IALGLCNSI		C0304	9	HSALPNQSL						C0702	9	VYPPLKGSF						C0801	9	NADHTTLLL		C0802	9	ISDLGQHTL		C1202	9	SAGVGAAHF		C1203	9	KAIDYIKYL		C1402	9	VFMISSHEL		C1403	9
C0102	9	TAPVSEVSI		C0302	9	YGIEHALAL		C0303	9	IAMGMAQAL		C0304	9	HSIGSYFTL						C0702	9	VYPPPHQVF						C0801	9	NADPASHEI		C0802	9	ISDLSEHVF		C1202	9	SAHLAFMTF		C1203	9	KAIDYIRFL		C1402	9	VFMPHVTEA		C1403	9
C0102	9	TAPYSLETL		C0302	9	YGIPFYLQY		C0303	9	IANAVVKEL		C0304	9	HSIIPRGSL						C0702	9	VYPQPPFSY						C0801	9	NADPQAVTM		C0802	9	ISDLSINSL		C1202	9	SAHNLQSVF		C1203	9	KAIEKNVLF		C1402	9	VFPDFYLHL		C1403	9
C0102	9	TFKESIVSL		C0302	9	YGSPGILEF		C0303	9	IAQDFKTDL		C0304	9	HTIFPSEYL						C0702	9	VYPQYVIEY						C0801	9	NADSQFWSL		C0802	9	ISDLSVNSL		C1202	9	SAIASTKVM		C1203	9	KAIELLQEF		C1402	9	VFPEFAAAH		C1403	9
C0102	9	TFNEDVQAL		C0302	9	YGSPNALVL		C0303	9	IAQGSYIAL		C0304	9	HTIVPGQVL						C0702	9	VYPTAVHVL						C0801	9	NADSSNTAL		C0802	9	ISDLVKVTL		C1202	9	SAIDRIFTL		C1203	9	KAIELQLQV		C1402	9	VFPEKGYSF		C1403	9
C0102	9	TFVPAMTAI		C0302	9	YIIGVFRKF		C0303	9	IAQPVRSFL		C0304	9	HVFIGGTPL						C0702	9	VYPWTQRFF						C0801	9	NADSSVQLL		C0802	9	ISDNAAKIL		C1202	9	SAIGYIHSL		C1203	9	KAIEVLLTL		C1402	9	VFPKPVTAL		C1403	9
C0102	9	TGPDVVKSV		C0302	9	YIISGLTGF		C0303	9	IASAIVNEL		C0304	9	HVITKTMEL						C0702	9	VYQEMPAQL						C0801	9	NAENIFHSM		C0802	9	ISDNAARVL		C1202	9	SAIKTPQCY		C1203	9	KAISGVHTV		C1402	9	VFPLAAGIF		C1403	9
C0102	9	TGPITGLAL		C0302	9	YILDQTNVY		C0303	9	IASIHSFEL		C0304	9	HVLEPLSSL						C0702	9	VYRTPTEAL						C0801	9	NAEPEPRSL		C0802	9	ISDPEKWEI		C1202	9	SAILHPSTY		C1203	9	KAITFVTQY		C1402	9	VFPLFSSEL		C1403	9
C0102	9	TGPPAMKSL		C0302	9	YILGKFFAL		C0303	9	IASPPSLIL		C0304	9	HVMKAMQSL						C0702	9	VYRTVIEYY						C0801	9	NAFDIAEEL		C0802	9	ISDPYNVNL		C1202	9	SAIPHPLIM		C1203	9	KAKDPFAHL		C1402	9	VFPTRTARF		C1403	9
C0102	9	TIFGKAHSL		C0302	9	YIMAPGLLH		C0303	9	IASPVIAAV		C0304	9	HVPEHAVVL						C0702	9	VYVQHPITF						C0801	9	NAFSGVMML		C0802	9	ISDQNIKDL		C1202	9	SAISRAASV		C1203	9	KAMELIREL		C1402	9	VFPWHKNLL		C1403	9
C0102	9	TIIDKSKSV		C0302	9	YIMDWMDEM		C0303	9	IASPVQPVL		C0304	9	IAAGIFNDL						C0702	9	WRPPPLNPY						C0801	9	NAIDDGCVV		C0802	9	ISDRYYTAL		C1202	9	SAKDGTCTL		C1203	9	KANITFEYM		C1402	9	VFQERINCL		C1403	9
C0102	9	TIIEATHVL		C0302	9	YIQEHLLQI		C0303	9	IATEIILEI		C0304	9	IAAMPLISL						C0702	9	YAGLSMEGG						C0801	9	NAIDKLFVL		C0802	9	ISDSADCSL		C1202	9	SAKDLICTH		C1203	9	KAPDFVFYA		C1402	9	VFQEVGINY		C1403	9
C0102	9	TIIPKVLAM		C0302	9	YIRDLALEY		C0303	9	IATLAITTL		C0304	9	IAAPFTSKL						C0702	9	YHIGIPLTY						C0801	9	NAIEGGTQL		C0802	9	ISDSNPMVV		C1202	9	SAKDWPQTF		C1203	9	KAQNKPFYV		C1402	9	VFQPETSTL		C1403	9
C0102	9	TILDKAMVL		C0302	9	YIYPKHLKY		C0303	9	IAVAITEAL		C0304	9	IAAPNMKAM						C0702	9	YHSPYPEEY						C0801	9	NAIGPLVAL		C0802	9	ISDSVGVFL		C1202	9	SAKFASCFY		C1203	9	KASEKILQV		C1402	9	VFQPSVKSL		C1403	9
C0102	9	TILDNRKEL		C0302	9	YLLDHFLSM		C0303	9	IAVANAQEL		C0304	9	IAAPTSSAL						C0702	9	YKAPTDYCF						C0801	9	NAILVDTPL		C0802	9	ISDSVLVDI		C1202	9	SAKITGVSH		C1203	9	KASHILISV		C1402	9	VFQPSVRSL		C1403	9
C0102	9	TINGHNAEV		C0302	9	YLLPDTKAY		C0303	9	IAVEPGNQW		C0304	9	IAAVPATAM						C0702	9	YKFDFPVSY						C0801	9	NAINITSAL		C0802	9	ISDTGGQQL		C1202	9	SAKPEISAM		C1203	9	KASPLTFTV		C1402	9	VFQQVGVSM		C1403	9
C0102	9	TIPDWLQAI		C0302	9	YLLPHILVY		C0303	9	IAVGVGAQL		C0304	9	IAAVTDIPL						C0702	9	YKGQYILTL						C0801	9	NAIREVLEL		C0802	9	ISDTGIMHL		C1202	9	SAKPPTHKY		C1203	9	KATAYILSV		C1402	9	VFQVKTLSL		C1403	9
C0102	9	TIPGGTPSL		C0302	9	YLNDAFLEF		C0303	9	IAVPDPSVL		C0304	9	IADGVFRFL						C0702	9	YKIAFPYLY						C0801	9	NAISIHHAL		C0802	9	ISDTMVAQL		C1202	9	SAKPQTTVF		C1203	9	KATEYIQYM		C1402	9	VFQYRLVEY		C1403	9
C0102	9	TIPSQILEV		C0302	9	YLRPPNTSL		C0303	9	IAVPEARFL		C0304	9	IADLVSKEL						C0702	9	YKIPYTTVL						C0801	9	NALDLNSVL		C0802	9	ISDTQRISL		C1202	9	SAKSPTATF		C1203	9	KATFIIKII		C1402	9	VFSDGAVSL		C1403	9
C0102	9	TIPVVHASI		C0302	9	YNMPYPPVY		C0303	9	IAWPPPTEL		C0304	9	IADPFFRSA						C0702	9	YKLDNQFEL						C0801	9	NALGVILQV		C0802	9	ISDVLQRDL		C1202	9	SAKTPGFSV		C1203	9	KATNVVRLL		C1402	9	VFSVRGTSF		C1403	9
C0102	9	TIQGAANAL		C0302	9	YQIAVTKVL		C0303	9	IAYDVTYSL		C0304	9	IADPNIAKL						C0702	9	YKNPDQVYL						C0801	9	NAMEDAQTL		C0802	9	ISDVVKQPA		C1202	9	SAKVANASY		C1203	9	KATPLVLKA		C1402	9	VFVDRAACF		C1403	9
C0102	9	TLHEQASAL		C0302	9	YQQELEREL		C0303	9	IAYIRDLAL		C0304	9	IADSGLKIL						C0702	9	YKNPSEYHY						C0801	9	NASEDRLEL		C0802	9	ISDYAVKIV		C1202	9	SAKVPSDEY		C1203	9	KAVDIVKQV		C1402	9	VFVDRAGEW		C1403	9
C0102	9	TLPDWKRSL		C0302	9	YSAPVIHVL		C0303	9	IAYPKAVTM		C0304	9	IAEMVRHAL						C0702	9	YKPDVKIEY						C0801	9	NASESKLEL		C0802	9	ISDYTVTEI		C1202	9	SALVTGQSY		C1203	9	KAVEIYASV		C1402	9	VFVDRTLDL		C1403	9
C0102	9	TLPGPGASL		C0302	9	YSFDYPSDM		C0303	9	IGIDHIKEL		C0304	9	IAENLPKQL						C0702	9	YKQPMFYHL						C0801	9	NASPVISSV		C0802	9	ISEQTGKEL		C1202	9	SAMEVVPAL		C1203	9	KAVELLVEL		C1402	9	VFVEATHVL		C1403	9
C0102	9	TLPHEILEM		C0302	9	YSFHKFHYL		C0303	9	IGNPHHVSL		C0304	9	IAFGPALAL						C0702	9	YKQVLEPSF						C0801	9	NATHQHCVL		C0802	9	ISVLPMEVL		C1202	9	SAMPTSSSF		C1203	9	KAVGWRLIA		C1402	9	VFVEDVDSF		C1403	9
C0102	9	TLPTVIAEL		C0302	9	YSGSPTSYF		C0303	9	IGYSSPLTL		C0304	9	IAFGQSMDL						C0702	9	YKVEYPIMY						C0801	9	NATWVRAEL		C0802	9	ITDAEGLGL		C1202	9	SAMSNPRAM		C1203	9	KAVHVIYTV		C1402	9	VFVVDSAAF		C1403	9
C0102	9	TMPPVGTDL		C0302	9	YSIVGLSSL		C0303	9	IIEPSLRQL		C0304	9	IAFHSAVSL						C0702	9	YKVPHPLEH						C0801	9	NAVAAAHSV		C0802	9	ITDDEIISL		C1202	9	SAMSRPIIH		C1203	9	KAVSFHLVH		C1402	9	VFYELAHQL		C1403	9
C0102	9	TMPSDVLEV		C0302	9	YSKLPGVSL		C0303	9	IIINPSSSL		C0304	9	IAFPAAPLL						C0702	9	YKVPQVRVL						C0801	9	NAVAALSEI		C0802	9	ITDEQIQEM		C1202	9	SANDAIATL		C1203	9	KAVSLFLCY		C1402	9	VFYPSSLAF		C1403	9
C0102	9	TMPTDVLEV		C0302	9	YSLDHISSL		C0303	9	IIIPNPAAL		C0304	9	IAFPKAEEL						C0702	9	YLPYRDYNY						C0801	9	NAVDPDVSA		C0802	9	ITDFQFKEL		C1202	9	SANDFFSYY		C1203	9	KAVSLINAI		C1402	9	VFYPYPQYF		C1403	9
C0102	9	TMSGVTTCL		C0302	9	YSLPNAPTL		C0303	9	IIITPTREL		C0304	9	IAFPTSISV						C0702	9	YRAQPSASL						C0801	9	NAVFTFEQL		C0802	9	ITDFSGIVL		C1202	9	SANVSKVSF		C1203	9	KAVTHQVKF		C1402	9	VMINKATPY		C1403	9
C0102	9	TSAPKGSVL		C0302	9	YSMDENLEF		C0303	9	IITPAFAEL		C0304	9	IAFQYSTVL						C0702	9	YRDPHVDQY						C0801	9	NAVGDGIVL		C0802	9	ITDGNSEHL		C1202	9	SAPASQASL		C1203	9	KAVVFFVFY		C1402	9	VVNIQTIAM		C1403	9
C0102	9	TSPAVGSIL		C0302	9	YSMPISIEF		C0303	9	IITTVGPEL		C0304	9	IAIAPNGAL						C0702	9	YREILVKEL						C0801	9	NAVPLFLRL		C0802	9	ITDGVITDL		C1202	9	SAPGIISAL		C1203	9	KAWFLPIMY		C1402	9	VVVDVSHED		C1403	9
C0102	9	TSPEAFLAL		C0302	9	YSMPSTHAM		C0303	9	IIVDPAREL		C0304	9	IAIDGGKVL						C0702	9	YRFDPRSGP						C0801	9	NAVSGQESL		C0802	9	ITDKGIIAL		C1202	9	SAPSHSTSL		C1203	9	KAWPLLLVV		C1402	9	VYAFSARPL		C1403	9
C0102	9	TSPEIVTAL		C0302	9	YSSSRTLLF		C0303	9	IIVGNPKAL		C0304	9	IAIEDPFSV						C0702	9	YRFETVQKL						C0801	9	NAYDEHQTL		C0802	9	ITDLPSEVL		C1202	9	SAPSSSTPF		C1203	9	KAYEKILFT		C1402	9	VYALQQTAL		C1403	9
C0102	9	TSPENNASL		C0302	9	YSVDRLYEL		C0303	9	IIYTAKISL		C0304	9	IAIEGIMNL						C0702	9	YRGQPGNAY						C0801	9	NITSSTCEL		C0802	9	ITDNDIQSL		C1202	9	SAREAAASL		C1203	9	KAYEKLQIL		C1402	9	VYEGEVTEL		C1403	9
C0102	9	TSPQFQQAL		C0302	9	YSVYVYKVL		C0303	9	IPVTELRYF		C0304	9	IAIGSQPVL						C0702	9	YRHDAVKIL						C0801	9	NIVKVFEIL		C0802	9	ITDPANEKL		C1202	9	SARIIGVSH		C1203	9	KAYELALYL		C1402	9	VYFASLLTV		C1403	9
C0102	9	TSPVINTSL		C0302	9	YSYFHFVFF		C0303	9	ISAETFTAL		C0304	9	IAIIPSKKL						C0702	9	YRHGKAYRF						C0801	9	NSAPAGETL		C0802	9	ITDPSVIVM		C1202	9	SARTPGPAV		C1203	9	KAYFDVKEY		C1402	9	VYFGIAASL		C1403	9
C0102	9	TSPVINVPL		C0302	9	YSYFSPRTM		C0303	9	ISDNAAKIL		C0304	9	IAIKFGSAL						C0702	9	YRHLCAVYY						C0801	9	NSDPYSVAL		C0802	9	ITDSKVSNL		C1202	9	SASDHIVQF		C1203	9	KAYGKDFHL		C1402	9	VYFPALTSL		C1403	9
C0102	9	TSPVPGRTL		C0302	9	YTFEDRINF		C0303	9	ISEENFRVM		C0304	9	IAIKYSRTL						C0702	9	YRHLVGVCY						C0801	9	NSFTLDADF		C0802	9	ITDSTGTHL		C1202	9	SASDVHGNF		C1203	9	KAYHEQLSV		C1402	9	VYFPWVSQY		C1403	9
C0102	9	TSPVTARTL		C0302	9	YTLINHRVL		C0303	9	ISGGKPLEV		C0304	9	IAINISRNL						C0702	9	YRHPDPREL						C0801	9	NSHCFPAFL		C0802	9	ITDVHSNDL		C1202	9	SASGPFESH		C1203	9	KAYHEQLTV		C1402	9	VYFQMQTTY		C1403	9
C0102	9	TTPIQTAAL		C0302	9	YTMPNFRQY		C0303	9	ISIDRFLAV		C0304	9	IAIPDASKL						C0702	9	YRIESYWTY						C0801	9	NSHVIQEYL		C0802	9	ITDVSLHAL		C1202	9	SASPIFTHV		C1203	9	KAYNRVIYV		C1402	9	VYFSAAHAL		C1403	9
C0102	9	TVMDKTRAL		C0302	9	YTTDFIYQL		C0303	9	ISIHVGQAG		C0304	9	IAIPFGTAL						C0702	9	YRKPKWNHL						C0801	9	NSHWDPVSL		C0802	9	IVDAALSAL		C1202	9	SASPSTSSF		C1203	9	KAYNYIRIM		C1402	9	VYFTQGLGL		C1403	9
C0102	9	TVPASFSSL		C0302	9	YTVTDLVEY		C0303	9	ISILQQIEL		C0304	9	IAIPFLIKL						C0702	9	YRKPTYESY						C0801	9	NSSPVINHL		C0802	9	IVDAANAVI		C1202	9	SASVVFTTY		C1203	9	KAYPFPLSH		C1402	9	VYFVQKNSL		C1403	9
C0102	9	TVPATEQEL		C0302	9	YTYLRINFY		C0303	9	ISMIPAKCL		C0304	9	IAIPVTQEL						C0702	9	YRKTLIHCY						C0801	9	NSTGVLLEV		C0802	9	IVDANLSVL		C1202	9	SATELMNIL		C1203	9	KGFDWPLLV		C1402	9	VYHEILIGY		C1403	9
C0102	9	TVPFTVESL		C0302	9	YVIQHVLEH		C0303	9	ISNPNSIIL		C0304	9	IAIPVTVAF						C0702	9	YRLEYMRVL						C0801	9	NSVEPAQPL		C0802	9	IVDAVGTML		C1202	9	SATSVHTSV		C1203	9	KGIGHVIKV		C1402	9	VYHVVGVDV		C1403	9
C0102	9	TVPKDLRHL		C0302	9	YVIQKFFEF		C0303	9	ISSPVVTSL		C0304	9	IAISRTPVL						C0702	9	YRLHHVVVY						C0801	9	NTATIFHEL		C0802	9	IVDDCGGAF		C1202	9	SATYIAEEY		C1203	9	KGIPHLVTH		C1402	9	VYIDKVRSL		C1403	9
C0102	9	TVPLPASQL		C0302	9	YVNLPTIAL		C0303	9	ISTEVNPKL		C0304	9	IALEAAKAL						C0702	9	YRNAYTMVL						C0801	9	NTIDPSHPM		C0802	9	IVDDFGTHL		C1202	9	SAVAKALEH		C1203	9	KGSGVVIIM		C1402	9	VYIDQTMVL		C1403	9
C0102	9	TVYLRDIAL		C0302	9	YVTTSTRTY		C0303	9	ISTNSHPIL		C0304	9	IALGEFSTL						C0702	9	YRNEFTAWY						C0801	9	NTIETFNEL		C0802	9	IVDDPEGFF		C1202	9	SAVELVQEF		C1203	9	KIADFGWSV		C1402	9	VYIDRVRSL		C1403	9
C0102	9	TVYVSMIAL		C0302	9	YVYPKYLKY		C0303	9	ISVASFQEL		C0304	9	IALLKAIIL						C0702	9	YRNKFTQKY						C0801	9	NVDGHLYEL		C0802	9	IVDEGGDAL		C1202	9	SAVEPINTF		C1203	9	KIFPSVIKY		C1402	9	VYIEHRLMM		C1403	9
C0102	9	TWDERFSAL		C0302	9	YVYSHFLQF		C0303	9	ISVQPSSSL		C0304	9	IAMDLILKM						C0702	9	YRNPCYVSY						C0801	9	NVDPDNVVL		C0802	9	IVDEVNGLI		C1202	9	SAVPSTSTM		C1203	9	KIIPLVVKF		C1402	9	VYIGVHVPF		C1403	9
C0102	9	VANVSLLAL						C0303	9	ITAPPGTAA		C0304	9	IAMGMAQAL						C0702	9	YRNPKEWTK						C0801	9	NVDPDSVVL		C0802	9	IVDGERTVL		C1202	9	SAVQDISSH		C1203	9	KIPNFCVLL		C1402	9	VYINTAQEF		C1403	9
C0102	9	VAPAAASSL						C0303	9	ITAPPSRVL		C0304	9	IAMPLHMIF						C0702	9	YRNPVSQCM						C0801	9	NVLDHFSEL		C0802	9	IVDIGPDSL		C1202	9	SAYAQIVQF		C1203	9	KIPNFWVTT		C1402	9	VYIPFSAIY		C1403	9
C0102	9	VAPAGPASL						C0303	9	ITDPQQLQL		C0304	9	IANAVVKEL						C0702	9	YRNVHAVVF						C0801	9	NVVDVFHAV		C0802	9	IVDIPGTSV		C1202	9	SAYQHPASF		C1203	9	KISNIIKQF		C1402	9	VYISNGQVL		C1403	9
C0102	9	VAPASVITI						C0303	9	ITIKPVLSL		C0304	9	IANDRFINM						C0702	9	YRPAYLVTL						C0801	9	NVVEALIAL		C0802	9	IVDKSGRTL		C1202	9	SAYQHPTTF		C1203	9	KIVDWAIQV		C1402	9	VYISSRPPL		C1403	9
C0102	9	VAPAYGVYL						C0303	9	ITISPLQEL		C0304	9	IANPTAMLL						C0702	9	YRPDMPCFL						C0801	9	PASPAISVV		C0802	9	IVDLTCESL		C1202	9	SAYQSITHY		C1203	9	KIVKWDRDM		C1402	9	VYLERLLTY		C1403	9
C0102	9	VAPEEHPVL						C0303	9	ITLHVFWEL		C0304	9	IANPTATLL						C0702	9	YRPGHYDIL						C0801	9	PIRLLAAAA		C0802	9	IVDPQNQTM		C1202	9	SGGPGPRVY		C1203	9	KIYEEPIIL		C1402	9	VYLFTEAYY		C1403	9
C0102	9	VAPESFEYI						C0303	9	ITSDPGLSL		C0304	9	IAQDFKTDL						C0702	9	YRPGPWMKY						C0801	9	QAADSILVL		C0802	9	IVDPVDSTL		C1202	9	SGPGPAAAL		C1203	9	KLASYVKFY		C1402	9	VYLPMSYCY		C1403	9
C0102	9	VAPFFKSYI						C0303	9	IVAEPGAVL		C0304	9	IAQGSYIAL						C0702	9	YRPHTITLL						C0801	9	QACGITAVL		C0802	9	IVDQVMVTL		C1202	9	SIESIHSEM		C1203	9	KLSDLLKYY		C1402	9	VYLPTHTSL		C1403	9
C0102	9	VAPGKRPAL						C0303	9	IVIDGSGAL		C0304	9	IAQPVRSFL						C0702	9	YRPISASVL						C0801	9	QADAPNPSL		C0802	9	IVDRGSTNL		C1202	9	SIIDTPGIL		C1203	9	KLVDFVIHF		C1402	9	VYLYYKLAY		C1403	9
C0102	9	VAPGLVLGL						C0303	9	IVIDPKNPL		C0304	9	IARLPSSTL						C0702	9	YRPLQSTEF						C0801	9	QADARQVVL		C0802	9	IVDRPGQQT		C1202	9	SIIKPQNTY		C1203	9	KLYGKPIRV		C1402	9	VYMNRVKEI		C1403	9
C0102	9	VAPGPVIGL						C0303	9	IVMEHVVFL		C0304	9	IASAIVNEL						C0702	9	YRPLTVLTF						C0801	9	QADCAVLIV		C0802	9	IVDRPVTLV		C1202	9	SIKEPVSTL		C1203	9	KNFDMVIVY		C1402	9	VYNFSLVAL		C1403	9
C0102	9	VAPGSVQCL						C0303	9	IVMPNILVL		C0304	9	IASIHSFEL						C0702	9	YRPLYPFSL						C0801	9	QADEVIAIL		C0802	9	IVDSARSIL		C1202	9	SINGAITQF		C1203	9	KQAEIVKRL		C1402	9	VYNVQYSFI		C1403	9
C0102	9	VAPGTGIDL						C0303	9	IVNGHTLLV		C0304	9	IASPPSLIL						C0702	9	YRPNETFHL						C0801	9	QADNPHVAL		C0802	9	IWDVSVNSV		C1202	9	SIPDFPMHL		C1203	9	KQFEGTVEI		C1402	9	VYNVTQHAV		C1403	9
C0102	9	VAPKQLHSL						C0303	9	IVVAPSQTL		C0304	9	IASPVIAAV						C0702	9	YRPPGARLT						C0801	9	QADPSAPCL		C0802	9	IYDLATQTL		C1202	9	SIPENVSTH		C1203	9	KQFGNILIL		C1402	9	VYNYAEQTL		C1403	9
C0102	9	VAPLATVNI						C0303	9	IVYGSFRSL		C0304	9	IASPVQPVL						C0702	9	YRPVLPLML						C0801	9	QADPTKLEL		C0802	9	KAAELEMEL		C1202	9	SIRDGVRAY		C1203	9	KQFHLTPVM		C1402	9	VYPDGIRHI		C1403	9
C0102	9	VAPPGCSHL						C0303	9	KAAHFFSTL		C0304	9	IATNGTPEL						C0702	9	YRPVRQYVY						C0801	9	QADQTFISL		C0802	9	KAAIMETLR		C1202	9	SIREAGGAF		C1203	9	KQFHRIVTY		C1402	9	VYPEYVIQY		C1403	9
C0102	9	VAPPGNISL						C0303	9	KAASVRPVL		C0304	9	IATWGIVVM						C0702	9	YRQKQVVIL						C0801	9	QADTTRLEL		C0802	9	KADDPYAHL		C1202	9	SIRPGLSPY		C1203	9	KQFPEVIKY		C1402	9	VYPLYTIVF		C1403	9
C0102	9	VAPPKAHEV						C0303	9	KACDYIQEL		C0304	9	IAVAITEAL						C0702	9	YRQPPVPQY						C0801	9	QAFGIMNEL		C0802	9	KADEGLASL		C1202	9	SIRQQILEH		C1203	9	KQIFETIYY		C1402	9	VYPMPRVIF		C1403	9
C0102	9	VAPPPPTHL						C0303	9	KADMNVHLL		C0304	9	IAVANAQEL						C0702	9	YRREIFIAF						C0801	9	QAFIGEEVL		C0802	9	KADEVLEIL		C1202	9	SLKDPSNNF		C1203	9	KQYGNEVFL		C1402	9	VYPPGFMGL		C1403	9
C0102	9	VAPPVSGDL						C0303	9	KAFNWFSTL		C0304	9	IAVDMTQHL						C0702	9	YRRPVLLLH						C0801	9	QAIENAHVL		C0802	9	KADFPTPSI		C1202	9	SLKTPGTSL		C1203	9	KSFEAPIKL		C1402	9	VYPPPHQVF		C1403	9
C0102	9	VAPRNSAEL						C0303	9	KAIDFAASL		C0304	9	IAVEPGNQW						C0702	9	YRTDLCLLY						C0801	9	QAIPVTSEL		C0802	9	KADGKIMAL		C1202	9	SLPSFPSTL		C1203	9	KSFEGLFYF		C1402	9	VYPQYVIEY		C1403	9
C0102	9	VAPSFGTLL						C0303	9	KAIDLMNAL		C0304	9	IAVGVGAQL						C0702	9	YRTDMIQAL						C0801	9	QALEQFHQL		C0802	9	KADGQQSSF		C1202	9	SLRPDRPLH		C1203	9	KSFEKLMKI		C1402	9	VYPTAVHVL		C1403	9
C0102	9	VAPSRAIYF						C0303	9	KAIEVLLTL		C0304	9	IAVPDPSVL						C0702	9	YRTPTTHTM						C0801	9	QALLDLHAL		C0802	9	KADGVPVYL		C1202	9	SQANIAQVL		C1203	9	KSFFRRLSF		C1402	9	VYQEIWIGM		C1403	9
C0102	9	VAPSRIRTL						C0303	9	KAIGLFISF		C0304	9	IAVPEARFL						C0702	9	YRTQSSASL						C0801	9	QIPEIKQTL		C0802	9	KADIIVSEL		C1202	9	SQYPFPVTL		C1203	9	KSIARVLTV		C1402	9	VYQIAMVHY		C1403	9
C0102	9	VAPTAGHSV						C0303	9	KAIRPYHAL		C0304	9	IAVYHLQEL						C0702	9	YRTTTVIFY						C0801	9	RAADVLVYL		C0802	9	KADIPLVVL		C1202	9	SQYQGVVVY		C1203	9	KSIDLIQKW		C1402	9	VYQNIFTAM		C1403	9
C0102	9	VAPTSGPAL						C0303	9	KAISRWSSL		C0304	9	IAWPPPTEL						C0702	9	YRVGYCNQL						C0801	9	RAAELFHQL		C0802	9	KADIPSVAF		C1202	9	SSFDMAQVF		C1203	9	KSIHIVVTM		C1402	9	VYQNQIAEL		C1403	9
C0102	9	VAPTSTVAV						C0303	9	KALSIFNEL		C0304	9	IAYDVTYSL						C0702	9	YRVHSIFVL						C0801	9	RAAEPLLTL		C0802	9	KADLESESF		C1202	9	SSFPTVVIY		C1203	9	KSKDFVQVM		C1402	9	VYQTYVNAM		C1403	9
C0102	9	VAPVAPVAV						C0303	9	KAMELIREL		C0304	9	IAYIRDLAL						C0702	9	YRVNGQYIM						C0801	9	RAASPIITL		C0802	9	KADLGKIVL		C1202	9	SSHVTNVSF		C1203	9	KSVDWLLVF		C1402	9	VYQYMHETI		C1403	9
C0102	9	VAPVAQVAL						C0303	9	KAMEYMFGW		C0304	9	IAYPKAVTM						C0702	9	YRVPGQFML						C0801	9	RACPATQAL		C0802	9	KADLGPISL		C1202	9	SSIGKLSEY		C1203	9	KSYLRCITF		C1402	9	VYSNPVSSL		C1403	9
C0102	9	VAPVPCTTL						C0303	9	KAMLRSLPI		C0304	9	IGIDHIKEL						C0702	9	YRVPNMRFL						C0801	9	RADDTFEAL		C0802	9	KADLTALFL		C1202	9	SSKEGGVTF		C1203	9	KSYSKAFTL		C1402	9	VYVAAVREF		C1403	9
C0102	9	VAPVSAVHA						C0303	9	KANPALYVL		C0304	9	IGYSSPLTL						C0702	9	YRVVFPLEL						C0801	9	RADESTYVL		C0802	9	KADMTCRGF		C1202	9	SSKEPAMSM		C1203	9	KTADICQML		C1402	9	VYVERAEVL		C1403	9
C0102	9	VAPVTGNDV						C0303	9	KATPQVPVL		C0304	9	IIEPSLRQL						C0702	9	YRVYQPVRY						C0801	9	RADPESPIL		C0802	9	KADNVGSAL		C1202	9	SSKEPPSAY		C1203	9	KTFPEIIDY		C1402	9	VYVKHSISF		C1403	9
C0102	9	VAPWNSLSL						C0303	9	KAVPQSLEL		C0304	9	IIINPSSSL						C0702	9	YYFFTPYVY						C0801	9	RAFGIPIRV		C0802	9	KADPQGPEL		C1202	9	SSKEPSNSL		C1203	9	KTFPYQHRY		C1402	9	VYVMGGVAM		C1403	9
C0102	9	VAYVSSVAL						C0303	9	KAYERGISL		C0304	9	IIIPNPAAL						C0702	9	YYFSKLIEF						C0801	9	RAFSDRSSL		C0802	9	KADPSHFEL		C1202	9	SSKPATSTF		C1203	9	KTIDYIQFL		C1402	9	VYVVGTAHF		C1403	9
C0102	9	VFAEKITSL						C0303	9	KINEAFIEM		C0304	9	IIITPGYGL						C0702	9	YYFVFDHAL						C0801	9	RAHDDPVAL		C0802	9	KADQKGVTI		C1202	9	SSMKPTLSH		C1203	9	KTPDFILQV		C1402	9	VYWVARKPM		C1403	9
C0102	9	VFCPVKEAL						C0303	9	KITEDFRAL		C0304	9	IILAPTREL						C0702	9	YYGEHLFML						C0801	9	RAHSEPLAL		C0802	9	KADQQLRSL		C1202	9	SSRDPGTHF		C1203	9	KTTELIRRI		C1402	9	VYYEVAGHL		C1403	9
C0102	9	VFIDGPLAL						C0303	9	KSIPSFSSL		C0304	9	IISPLFAEL						C0702	9	YYGNRAATL						C0801	9	RAIEIYTDM		C0802	9	KADRETVAV		C1202	9	SSSPVVVQH		C1203	9	KTVNKILQI		C1402	9	VYYFSKGTL		C1403	9
C0102	9	VFIDKQTNL						C0303	9	LAAARLAAA		C0304	9	IITAFIRAL						C0702	9	YYHARVYEF						C0801	9	RAIENIDTL		C0802	9	KADSINKPF		C1202	9	SSVEVRMEF		C1203	9	KTYPCKISY		C1402	9	VYYPELFVW		C1403	9
C0102	9	VFLPRVTEL						C0303	9	LAADCAHEL		C0304	9	IITPAFAEL						C0702	9	YYHVYKLTL						C0801	9	RALDHYLTL		C0802	9	KADSRLKAL		C1202	9	SSYPNPVAH		C1203	9	KVANLVKAY		C1402	9	WFHYTLVAF		C1403	9
C0102	9	VFQERINCL						C0303	9	LAAFPTTCL		C0304	9	IITTVGPEL						C0702	9	YYIDCIRQV						C0801	9	RALDVNVAL		C0802	9	KADSVVVLL		C1202	9	STFLSQTTY		C1203	9	KVFGHIRVY		C1402	9	WFIPFVQSL		C1403	9
C0102	9	VGPGFDAAL						C0303	9	LAAGHLVQL		C0304	9	IIVDPAREL						C0702	9	YYISPRITF						C0801	9	RALEDRHSL		C0802	9	KADTEEEFL		C1202	9	STHVTISTY		C1203	9	KVIELVKKY		C1402	9	WYQRVYQSL		C1403	9
C0102	9	VGPGPALML						C0303	9	LAAGPVGSL		C0304	9	IIVGNPKAL						C0702	9	YYKPDSPEY						C0801	9	RALEHFTDL		C0802	9	KADVEEEFL		C1202	9	STKEPGRTL		C1203	9	LAAAMVRVL		C1402	9	WYYSTKVQL		C1403	9
C0102	9	VGPGPTAAA						C0303	9	LAAGVVSAM		C0304	9	IIYTAKISL						C0702	9	YYNETHKIL						C0801	9	RALGFSEEL		C0802	9	KADVEEESL		C1202	9	STPDHTSTL		C1203	9	LAAAVPKIM		C1402	9	YFADGVLSL		C1403	9
C0102	9	VGPGPYRAT						C0303	9	LAAHLGSAL		C0304	9	ILNPHGIPL						C0702	9	YYPEYKLLF						C0801	9	RALHQGDSL		C0802	9	KADVEGELL		C1202	9	STVEVTNTF		C1203	9	LAADIFAIA		C1402	9	YFEDVANAM		C1403	9
C0102	9	VGPPAGSPF						C0303	9	LAAPIMLDL		C0304	9	INVEPLSSL						C0702	9	YYPNCEVVF						C0801	9	RALLDRDAL		C0802	9	KADVEKVAL		C1202	9	SVHQPGSHY		C1203	9	LAADIHQAL		C1402	9	YFFAVDTAY		C1403	9
C0102	9	VGPPPATSI						C0303	9	LAAPSNLSM		C0304	9	IQIERQKIL						C0702	9	YYPNPPLVL						C0801	9	RALYDFEAL		C0802	9	KADVVISAF		C1202	9	SVIATIQEY		C1203	9	LAAEFLKQV		C1402	9	YFHDATRVY		C1403	9
C0102	9	VGPSSDKAL						C0303	9	LAAPSPAAL		C0304	9	ISEENFRVM						C0702	9	YYPQQAIVF						C0801	9	RAMYLPDTL		C0802	9	KADVVPVTL		C1202	9	SVIDSPGIL		C1203	9	LAAIWFRTY		C1402	9	YFHDRFLEL		C1403	9
C0102	9	VGPVGNSDL						C0303	9	LAAPVISVL		C0304	9	ISFPSPDAL						C0702	9	YYRAWQEYY						C0801	9	RAQDPSEVL		C0802	9	KAEEPPSQL		C1202	9	SVIDVKTTM		C1203	9	LAAPICLLY		C1402	9	YFHDRVASF		C1403	9
C0102	9	VIAPNPAQL						C0303	9	LAARASLDL		C0304	9	ISGGKPLEV						C0702	9	YYRPLHDEY						C0801	9	RAQLQQVEL		C0802	9	KAVNPGRSL		C1202	9	SVIESHTEF		C1203	9	LAAPLLKRL		C1402	9	YFHEFGHVM		C1403	9
C0102	9	VIFATVREL						C0303	9	LAASVFTCL		C0304	9	ISIDRFLAV						C0702	9	YYSGLIYTY						C0801	9	RASFIFISV		C0802	9	KFDETEQAL		C1202	9	SVINPGAIY		C1203	9	LAAPMILSL		C1402	9	YFHIGSNAL		C1403	9
C0102	9	VIHATVTSV						C0303	9	LAATFIRSL		C0304	9	ISIGPGASF						C0702	9	YYSPHGHIL						C0801	9	RASSIYSKL		C0802	9	KGDEVTITL		C1202	9	SVKEWTITY		C1203	9	LAAPVISVL		C1402	9	YFHTMVESL		C1403	9
C0102	9	VIIEKTYSL						C0303	9	LAAVAHSPL		C0304	9	ISIGVTQIL						C0702	9	YYSPSCREF						C0801	9	RAVAPTMSL		C0802	9	KGDFSSNEV		C1202	9	SVKPASSSF		C1203	9	LAAQFVKLL		C1402	9	YFILNSSCL		C1403	9
C0102	9	VIKEQNREL						C0303	9	LACGKARVL		C0304	9	ISIHVGQAG						C0702	9	YYTEFPTVL						C0801	9	RAVEVSAEL		C0802	9	KGDLENAFL		C1202	9	SVKSPNQSL		C1203	9	LAATFIRSL		C1402	9	YFIRDVKSL		C1403	9
C0102	9	VINEMVREL						C0303	9	LACGVAKVL		C0304	9	ISILQQIEL						C0702	9	YYYTKEEQF						C0801	9	RAVQDVESL		C0802	9	KGDSTIREL		C1202	9	SVKWPNSVM		C1203	9	LAAYHPWVV		C1402	9	YFISHILAF		C1403	9
C0102	9	VINGHTLCL						C0303	9	LACGYLRNL		C0304	9	ISNPNSIIL														C0801	9	RAVSETESL		C0802	9	KIDDFPNEL		C1202	9	SVNGFISTL		C1203	9	LACGVAKVL		C1402	9	YFISYGIEH		C1403	9
C0102	9	VIPDEAKAL						C0303	9	LACLHIATL		C0304	9	ISNSHPLSL														C0801	9	RAYDGTTYL		C0802	9	KIDDILQTL		C1202	9	SVPAFASSL		C1203	9	LACPLLRQL		C1402	9	YFIVTRQDY		C1403	9
C0102	9	VIPDTIKEV						C0303	9	LACPLLRQL		C0304	9	ISSPVILQF														C0801	9	RAYNHLDEL		C0802	9	KIDDKPVKI		C1202	9	SVPSAVSSL		C1203	9	LAFAREFMA		C1402	9	YFKPMMKEF		C1403	9
C0102	9	VIPELAQEL						C0303	9	LADDSVRSL		C0304	9	ISSPVVTSL														C0801	9	RGDETFAVL		C0802	9	KIDDTIRYL		C1202	9	SVRKDIESY		C1203	9	LAFEGPILL		C1402	9	YFLEWRSVL		C1403	9
C0102	9	VIPHIHKSL						C0303	9	LADHTVHVL		C0304	9	ISTEVNPKL														C0801	9	RICPIDITL		C0802	9	KIDEKTAEL		C1202	9	SVRSNLTSF		C1203	9	LAFESIQKI		C1402	9	YFLNRKLVY		C1403	9
C0102	9	VIPIIGKCL						C0303	9	LADPVFRTL		C0304	9	ISTNSHPIL														C0801	9	RIDDLQMVL		C0802	9	KIDKYTEVL		C1202	9	TAAAVGAVF		C1203	9	LAFLRFVVY		C1402	9	YFLPLANTL		C1403	9
C0102	9	VIPKDYKTM						C0303	9	LADQKVHML		C0304	9	ISVASFQEL														C0801	9	RIPSFVTEL		C0802	9	KIDLAGSSL		C1202	9	TAADIFKQY		C1203	9	LAFPAPLYY		C1402	9	YFLSRAQSL		C1403	9
C0102	9	VIPQYHSSV						C0303	9	LADTTFRTI		C0304	9	ISVQPSSSL														C0801	9	RIVDPEIAL		C0802	9	KIDLENRQV		C1202	9	TAADLGSVV		C1203	9	LAFPGEMLL		C1402	9	YFLTTRQTL		C1403	9
C0102	9	VIPRITIEM						C0303	9	LADVKVHIL		C0304	9	ITAPPSRVL														C0801	9	RPAPVAVAA		C0802	9	KIDLETHSL		C1202	9	TAADLVPIF		C1203	9	LAFPVGVFV		C1402	9	YFPDKVALL		C1403	9
C0102	9	VIPSTPLAI						C0303	9	LAEAGVRLL		C0304	9	ITDFQFKEL														C0801	9	RPFHGISTV		C0802	9	KLDDMLSEL		C1202	9	TAADTVIIY		C1203	9	LAFSRALEL		C1402	9	YFPELIANF		C1403	9
C0102	9	VIPTNVPEL						C0303	9	LAFEGPILL		C0304	9	ITIKPVLSL														C0801	9	RPLLKAITA		C0802	9	KLDETGNSL		C1202	9	TAAGVTSIV		C1203	9	LAGPAEPEL		C1402	9	YFPGQAIAM		C1403	9
C0102	9	VIPYANHEL						C0303	9	LAFGSGMGL		C0304	9	ITISPLQEL														C0801	9	RPNDIMAEV		C0802	9	KLDETGVAL		C1202	9	TAAPPAQPL		C1203	9	LAIDAIHQL		C1402	9	YFPHYEVPL		C1403	9
C0102	9	VIQDFINAL						C0303	9	LAFLGSQSL		C0304	9	ITIVKSTEL														C0801	9	RPRPGTGLG		C0802	9	KLDLNGNTL		C1202	9	TAAPTGTTI		C1203	9	LAIEHVRFF		C1402	9	YFPKALAPL		C1403	9
C0102	9	VISGGASDL						C0303	9	LAFPGEMLL		C0304	9	ITLHVFWEL														C0801	9	RPSPAPPAA		C0802	9	KLDVGNAEV		C1202	9	TAAPTIGVL		C1203	9	LAIGLLHIV		C1402	9	YFPKKISEL		C1403	9
C0102	9	VLGSGFGEL						C0303	9	LAFPSPEKL		C0304	9	ITLLREISL														C0801	9	RPSPPVQSV		C0802	9	KMDDIVVVA		C1202	9	TAAPVPTTL		C1203	9	LAINHKLEI		C1402	9	YFPTQALNF		C1403	9
C0102	9	VLLPAASEL						C0303	9	LAFPTGCSL		C0304	9	ITSDPGLSL														C0801	9	RPVLPRTEA		C0802	9	KMDDPNFIP		C1202	9	TAARAWALF		C1203	9	LAIPFAITI		C1402	9	YFQAKIRAL		C1403	9
C0102	9	VLPAFTSNL						C0303	9	LAFSRALEL		C0304	9	ITSPHGIPL														C0801	9	RPYDKNISP		C0802	9	KMDLPGVSI		C1202	9	TAAWTGTTF		C1203	9	LAIPNLVIF		C1402	9	YFQALVNNM		C1403	9
C0102	9	VLPEVESSL						C0303	9	LAFTKSISL		C0304	9	ITVGPRGPL														C0801	9	RQALLLLAL		C0802	9	KMDRALLEL		C1202	9	TAFPEASFL		C1203	9	LAKAWPTVL		C1402	9	YFQHREFSF		C1403	9
C0102	9	VLPNIQAVL						C0303	9	LAGPDHLSL		C0304	9	ITYGQFAQL														C0801	9	RQAPPHIEL		C0802	9	KNAESNAEL		C1202	9	TAFPQRTEL		C1203	9	LAKDGVLTL		C1402	9	YFQTTSTNL		C1403	9
C0102	9	VLPNTALHL						C0303	9	LAGPPGPEL		C0304	9	IVAEPGAVL														C0801	9	RSAEPAEAL		C0802	9	KNDDFMNAL		C1202	9	TAIEKPEEF		C1203	9	LAKEFAEIL		C1402	9	YFVDDRLVM		C1403	9
C0102	9	VLPQRIREL						C0303	9	LAHPNIIAL		C0304	9	IVIDGSGAL														C0801	9	RSAEVTLEV		C0802	9	KNDIAINEL		C1202	9	TAIESGQHY		C1203	9	LALNFSVFY		C1402	9	YFWPRTVPM		C1403	9
C0102	9	VLPSYEEAL						C0303	9	LAHPYFESL		C0304	9	IVIDPKNPL														C0801	9	RSDCTYIVL		C0802	9	KNDIPSSYM		C1202	9	TAIRALETY		C1203	9	LANGDVWKV		C1402	9	YFYVIGSSY		C1403	9
C0102	9	VLPVYMNCL						C0303	9	LAHVVITQL		C0304	9	IVINPKTTL														C0801	9	RSHYSPIYL		C0802	9	KNDLAVVDV		C1202	9	TAISLCQTF		C1203	9	LAPGFVIKV		C1402	9	YLHPLRSLF		C1403	9
C0102	9	VMPGHSESL						C0303	9	LAIASGIYL		C0304	9	IVMEHVVFL														C0801	9	RSIGEYDVL		C0802	9	KNDQANYSL		C1202	9	TAISRYMEL		C1203	9	LAPNFRWAI		C1402	9	YMNVMLENY		C1403	9
C0102	9	VMPSRLKAL						C0303	9	LAIDAIHQL		C0304	9	IVMPLHYSL														C0801	9	RSIHIFDTL		C0802	9	KNDVGYREL		C1202	9	TAITRAQSL		C1203	9	LAQAHIQQL		C1402	9	YMPAKIGAF		C1403	9
C0102	9	VMPYIKTSL						C0303	9	LAIESANEL		C0304	9	IVMPNILVL														C0801	9	RTDDNCIVL		C0802	9	KQDESVKAL		C1202	9	TAKDPSVSI		C1203	9	LAQPQMMVV		C1402	9	YMPQNPHII		C1403	9
C0102	9	VSCQKQPAL						C0303	9	LAIFVICQL		C0304	9	IVNGHTLLV														C0801	9	RTDDTPVVL		C0802	9	KQDETQTKI		C1202	9	TAKEAGCRF		C1203	9	LAQQIHPVV		C1402	9	YWPDVIHSF		C1403	9
C0102	9	VSPATSQSI						C0303	9	LAIGPCKSL		C0304	9	IVVAPSQTL														C0801	9	RTLDCIHVL		C0802	9	KQDFSPEVL		C1202	9	TAKEIIQHF		C1203	9	LARLFTAYL		C1402	9	YYEFREEAY		C1403	9
C0102	9	VSPDAKTSL						C0303	9	LAIGSAATL		C0304	9	IVVPAGVEL														C0801	9	RTVDLFPVL		C0802	9	KQDGTIQNL		C1202	9	TAKELNVSF		C1203	9	LASAFFLVV		C1402	9	YYFALAHTV		C1403	9
C0102	9	VSPFAFEAM						C0303	9	LAIHGMETL		C0304	9	IVYPGIAVF														C0801	9	RVCEVDNEL		C0802	9	KQDLGPVPM		C1202	9	TAKGPGSGF		C1203	9	LASAIINTL		C1402	9	YYFDSYAHF		C1403	9
C0102	9	VSPGPLHCL						C0303	9	LAIIPHVTI		C0304	9	KAAHFFSTL														C0801	9	RVCEVEFVF		C0802	9	KQDLVELYL		C1202	9	TAKPGVSTV		C1203	9	LASANLRVL		C1402	9	YYFDYKEQL		C1403	9
C0102	9	VSPGPRPVL						C0303	9	LAIKPGTSV		C0304	9	KAASVRPVL														C0801	9	RVFLDHNAL		C0802	9	KQDQTLAEL		C1202	9	TAKRSGAVF		C1203	9	LASGLVVFF		C1402	9	YYFFTPYVY		C1403	9
C0102	9	VSPGQASPL						C0303	9	LAIPFAITI		C0304	9	KADMNVHLL														C0801	9	RVMELFFTV		C0802	9	KQDSGHLDL		C1202	9	TAKSATWTY		C1203	9	LASHYIHIV		C1402	9	YYFSKLIEF		C1403	9
C0102	9	VSPLATSAL						C0303	9	LAIPVFLTL		C0304	9	KAFFTSKAL														C0801	9	RVYEFLDKL		C0802	9	KQDVIITAL		C1202	9	TAKSPATCY		C1203	9	LASLIRSVV		C1402	9	YYFVFDHAL		C1403	9
C0102	9	VSPLNVTSV						C0303	9	LAIQIYQQL		C0304	9	KAFNWFSTL														C0801	9	SAACPGLQL		C0802	9	KQWLMTEAL		C1202	9	TAKSVTCTY		C1203	9	LASPPWRVL		C1402	9	YYFVTREVM		C1403	9
C0102	9	VSPNRLVAM						C0303	9	LAITGGVTL		C0304	9	KAFNYFSSL														C0801	9	SAAEAYQVL		C0802	9	KSDAACQTL		C1202	9	TAMFIASKY		C1203	9	LASPVSPEL		C1402	9	YYHARVYEF		C1403	9
C0102	9	VSPPIRPSL						C0303	9	LAITTEHTL		C0304	9	KAFPASAAL														C0801	9	SAAEIMAVL		C0802	9	KSDAPDTLL		C1202	9	TAQDLVQHF		C1203	9	LASQIIKTL		C1402	9	YYHSYWHSM		C1403	9
C0102	9	VSPPPGAVL						C0303	9	LAIVPVNTL		C0304	9	KAFPFHIIF														C0801	9	SAAELDLVL		C0802	9	KSDEGGKVL		C1202	9	TARYIYISY		C1203	9	LATDFIQSL		C1402	9	YYHYSYSVV		C1403	9
C0102	9	VSPQSRASL						C0303	9	LALAIAQEL		C0304	9	KAFQKIVVL														C0801	9	SAAENFLVL		C0802	9	KSDEKTWNL		C1202	9	TASAVVQHM		C1203	9	LATEVVTVF		C1402	9	YYIDCIRQV		C1403	9
C0102	9	VSPRQTLEL						C0303	9	LALDHLHSL		C0304	9	KAIDFAASL														C0801	9	SAAEPPTAL		C0802	9	KSDERLTAF		C1202	9	TASEIGSAF		C1203	9	LATLITQFL		C1402	9	YYIEGINQL		C1403	9
C0102	9	VSPSFSAEL						C0303	9	LALELHQEL		C0304	9	KAIDLMNAL														C0801	9	SAAEPTPAV		C0802	9	KSDEVTQEI		C1202	9	TASGVFSKF		C1203	9	LATPVVSVA		C1402	9	YYINIRKAL		C1403	9
C0102	9	VSPTKKVAV						C0303	9	LALETTNSL		C0304	9	KAIEVLLTL														C0801	9	SAAEPVPAA		C0802	9	KSDHVAACL		C1202	9	TASPVAVSL		C1203	9	LAVAHPLLL		C1402	9	YYISPRITF		C1403	9
C0102	9	VSPTVNQRL						C0303	9	LALFLKLHL		C0304	9	KAIGLFISF														C0801	9	SAAFPGASL		C0802	9	KSDIDEVAL		C1202	9	TASPVIKAV		C1203	9	LAVDKIIFV		C1402	9	YYITTRAQF		C1403	9
C0102	9	VSPYSGAVF						C0303	9	LALFPGVAL		C0304	9	KAINVFVSA														C0801	9	SAAGAECEL		C0802	9	KSDIGEVIL		C1202	9	TAVIPTNVF		C1203	9	LAVDNILYI		C1402	9	YYITTRVQF		C1403	9
C0102	9	VSQEVTRSL						C0303	9	LALIIMKIL		C0304	9	KAIRPYHAL														C0801	9	SAAGLKLYL		C0802	9	KSDIYLNLL		C1202	9	TAVYKVSEY		C1203	9	LAVEAVLRL		C1402	9	YYKNIGLGF		C1403	9
C0102	9	VTAVSGKAL						C0303	9	LALTRSSSL		C0304	9	KAISRWSSL														C0801	9	SAAGPGFSL		C0802	9	KSDLLKAAL		C1202	9	TAYAYATVL		C1203	9	LAVNHVFEI		C1402	9	YYLARLLGL		C1403	9
C0102	9	VTPGSKAAL						C0303	9	LAMEPTPEL		C0304	9	KALSIFNEL														C0801	9	SAAHAIVSV		C0802	9	KSDLQMQKI		C1202	9	TAYPASIVH		C1203	9	LAVNKIKEI		C1402	9	YYLGKILEM		C1403	9
C0102	9	VTPNCRVAL						C0303	9	LAMLRSLDL		C0304	9	KAMELIREL														C0801	9	SAAMPGASL		C0802	9	KSDPSIVRL		C1202	9	TAYPGQTQY		C1203	9	LAVNLTRVL		C1402	9	YYLNEIQSF		C1403	9
C0102	9	VTPNTGMSL						C0303	9	LAMPGETVL		C0304	9	KAMEYMFGW														C0801	9	SAAMVFSAL		C0802	9	KSDSPAIQL		C1202	9	TGIPGLEQL		C1203	9	LAVPFCVNF		C1402	9	YYLPKDDEY		C1403	9
C0102	9	VTPQAGTAL						C0303	9	LAMRPLASL		C0304	9	KAMPITLHL														C0801	9	SAAPGTASL		C0802	9	KSDVPIQLL		C1202	9	TGMVPGSEF		C1203	9	LAVPIILRV		C1402	9	YYLPKLLSY		C1403	9
C0102	9	VTPSAMAEL						C0303	9	LANALTSAL		C0304	9	KANPALYVL														C0801	9	SAAPPEPAV		C0802	9	KSEGNHPAL		C1202	9	TIAKPTTHF		C1203	9	LAVSLVKVF		C1402	9	YYLTFVQEL		C1403	9
C0102	9	VTPSKYSSL						C0303	9	LANEHNVAL		C0304	9	KASDLYITL														C0801	9	SAAPPGLEA		C0802	9	KTDEMHTAL		C1202	9	TIIEATHVL		C1203	9	LAVSRIITW		C1402	9	YYLTHGLYL		C1403	9
C0102	9	VTPVTGASL						C0303	9	LANEPSVAL		C0304	9	KATFHYRTL														C0801	9	SAAPPLPSL		C0802	9	KTDESSPVL		C1202	9	TIINLAQNF		C1203	9	LAVSRVITW		C1402	9	YYLVKREDY		C1403	9
C0102	9	VVIGNIGAL						C0303	9	LANERLMTL		C0304	9	KATPQVPVL														C0801	9	SAAQPGVAF		C0802	9	KTDHRNVEL		C1202	9	TIKDCATVF		C1203	9	LAWQNPHML		C1402	9	YYLWMLHSV		C1403	9
C0102	9	VVKPPGSSL						C0303	9	LANGQTKVL		C0304	9	KAVPSFDSL														C0801	9	SAASPAVAL		C0802	9	KTDPSVRPM		C1202	9	TIKDPPTSA		C1203	9	LAYAEYVIY		C1402	9	YYMDYLAAL		C1403	9
C0102	9	VVNGRVLEL						C0303	9	LANLHITAL		C0304	9	KAYEIMREL														C0801	9	SACDGIFHL		C0802	9	KTDQLVSFL		C1202	9	TIKDVSLCF		C1203	9	LAYANLMLL		C1402	9	YYNLQGISH		C1403	9
C0102	9	VVPARSEAL						C0303	9	LANPHELSL		C0304	9	KCLELFSEL														C0801	9	SACFTLQEL		C0802	9	KTDVCTVHL		C1202	9	TIKSATISY		C1203	9	LAYHLAVVL		C1402	9	YYPAKIEAI		C1403	9
C0102	9	VVPDSAHKL						C0303	9	LANPTTSAL		C0304	9	KINEAFIEM														C0801	9	SACGHTAVL		C0802	9	KTDVVVNSV		C1202	9	TIMAHVTEF		C1203	9	LAYHRLHQL		C1402	9	YYPEHTSVL		C1403	9
C0102	9	VVPSCVASL						C0303	9	LAQDIFKEL		C0304	9	KITEDFRAL														C0801	9	SACHLLVSL		C0802	9	KTTTPGPSL		C1202	9	TINEIEDTF		C1203	9	LAYIHLIEF		C1402	9	YYPELAFQF		C1403	9
C0102	9	VVQDVASAL						C0303	9	LAQGDMKQL		C0304	9	KIVKWDRDM														C0801	9	SACHVSNTL		C0802	9	KVDDCSEVL		C1202	9	TINGKIAVL		C1203	9	LAYLRTECY		C1402	9	YYPEYLINL		C1403	9
C0102	9	VVQGDPREL						C0303	9	LAQHTMLTL		C0304	9	KSIPSFSSL														C0801	9	SACPLLLTL		C0802	9	KVDEAVAVL		C1202	9	TLITGLEEY		C1203	9	LAYMNHIMV		C1402	9	YYPFHYAPF		C1403	9
C0102	9	YAPARLAAA						C0303	9	LAQPQMMVV		C0304	9	KTIPSWATL														C0801	9	SADACHAEL		C0802	9	KVDELTTEI		C1202	9	TLKDHIMSH		C1203	9	LAYNEIITI		C1402	9	YYPQQAIVF		C1403	9
C0102	9	YAPHYDSTF						C0303	9	LAQQAILSL		C0304	9	LAAAMVRVL														C0801	9	SADATPLHV		C0802	9	KVDLAKRTL		C1202	9	TLKEAGTHY		C1203	9	LAYPDKLVM		C1402	9	YYPSDVSSL		C1403	9
C0102	9	YAPINANAI						C0303	9	LAQVSGLEM		C0304	9	LAAEGQLTL														C0801	9	SADENYRPL		C0802	9	KVDPLFTEL		C1202	9	TLKTPGKSF		C1203	9	LAYPNGHYF		C1402	9	YYPYTITEY		C1403	9
C0102	9	YAPMGMHPM						C0303	9	LARPASAAL		C0304	9	LAAGVVSAM														C0801	9	SADGMRLAL		C0802	9	KVDPSGVSL		C1202	9	TMKDFNHSY		C1203	9	LAYPNPIDP		C1402	9	YYQDTPKQI		C1403	9
C0102	9	YAPPPFLHI						C0303	9	LASAVISVL		C0304	9	LAAHIPLFL														C0801	9	SADHLAHEV		C0802	9	KVDSEENTL		C1202	9	TSAPTGHTF		C1203	9	LAYPTAVNW		C1402	9	YYQHIVTTL		C1403	9
C0102	9	YAPQGWIAF						C0303	9	LASHILTAL		C0304	9	LAAHLGSAL														C0801	9	SADKFQVLL		C0802	9	KVEEPSQCL		C1202	9	TSFPHESTF		C1203	9	LAYQKQWEV		C1402	9	YYQLMKTAL		C1403	9
C0102	9	YAPVHADDL						C0303	9	LASPESLEL		C0304	9	LAALLHAIA														C0801	9	SADMSHVAL		C0802	9	LAAARLAAA		C1202	9	TSKVPSAPH		C1203	9	LAYSGVHLY		C1402	9	YYQNHIMNL		C1403	9
C0102	9	YAPYPSPVL						C0303	9	LASPPWRVL		C0304	9	LAALPGVSL														C0801	9	SADNVRQQL		C0802	9	LADAINTEF		C1202	9	TTFPRPVTV		C1203	9	LAYSGYKYV		C1402	9	YYQPLVHLL		C1403	9
C0102	9	YFEGGVSSV						C0303	9	LASPSTSIL		C0304	9	LAALSWQYL														C0801	9	SADPEVMLL		C0802	9	LADAQNPSL		C1202	9	TTIDVRTTF		C1203	9	LFAPFIVYY		C1402	9	YYQSSVQYL		C1403	9
C0102	9	YIPEAILNL						C0303	9	LASPVFARL		C0304	9	LAAPMILSL														C0801	9	SADPGILVL		C0802	9	LADAVAVTM		C1202	9	TTKAPTGPF		C1203	9	LGRGKFAVV		C1402	9	YYQTPRLWL		C1403	9
C0102	9	YIPGKNRDL						C0303	9	LASPVSPEL		C0304	9	LAAPSNLSM														C0801	9	SADPNVVDL		C0802	9	LADDDARLL		C1202	9	TTYPNTYIF		C1203	9	LGYEEVVLY		C1402	9	YYQYMETYM		C1403	9
C0102	9	YIPHGYMEL						C0303	9	LATAAALTY		C0304	9	LAAPSPAAL														C0801	9	SADPRPLAV		C0802	9	LADDDFLTV		C1202	9	TVIDKLVVH		C1203	9	LGYPWVEYW		C1402	9	YYRDYPTLV		C1403	9
C0102	9	YLGNFRSAL						C0303	9	LATASSPKF		C0304	9	LAAPVISVL														C0801	9	SADQSPSAL		C0802	9	LADDLNEKI		C1202	9	TVIDSQTHY		C1203	9	LIFSVPIVY		C1402	9	YYSPHGHIL		C1403	9
C0102	9	YLNVQVKEL						C0303	9	LATDFIQSL		C0304	9	LAAVAHSPL														C0801	9	SADSLEHVL		C0802	9	LADDSRVVT		C1202	9	TVKDSRTVY		C1203	9	LIPKFVSFL		C1402	9	YYTDFVMEL		C1403	9
C0102	9	YLPAGQSVL						C0303	9	LATGAAMVL		C0304	9	LAAVPVQDL														C0801	9	SAEHSHPAL		C0802	9	LADDSVRSL		C1202	9	TVKPPTSVA		C1203	9	LIPYWTVYF		C1402	9	YYTVRQLEL		C1403	9
C0102	9	YLPDAVKGL						C0303	9	LATGHFMSV		C0304	9	LACIPVQEL														C0801	9	SAETPTIPL		C0802	9	LADEAEVHL		C1202	9	TVRDFTQVF		C1203	9	LIYGRPVYV		C1402	9	YYVRKVLEL		C1403	9
C0102	9	YLPPGFLSA						C0303	9	LATHPGISF		C0304	9	LADHTVHVL														C0801	9	SAFDHFASV		C0802	9	LADEAFFSV		C1202	9	TVRDHVHCL		C1203	9	LIYGTPRAA		C1402	9	YYVWTVKEV		C1403	9
C0102	9	YLPPGVIAL						C0303	9	LATIHLPYL		C0304	9	LADIGYKTF														C0801	9	SAFFDSTTL		C0802	9	LADEFGVAV		C1202	9	TVYDKPASF		C1203	9	LLKNPFLSV		C1402	9	YYYDKNIIH		C1403	9
C0102	9	YLPSAILQL						C0303	9	LATLIHQVL		C0304	9	LADPVFRTL														C0801	9	SAFGYFITA		C0802	9	LADEKVETV		C1202	9	VAAAPGTPA		C1203	9	LMSGKVKVW		C1402	9	YYYDPTTGL		C1403	9
C0102	9	YLPSFFTKL						C0303	9	LATPVDLKL		C0304	9	LADQKVHML														C0801	9	SAFPFPVTV		C0802	9	LADELINAA		C1202	9	VAAAVSGVY		C1203	9	LMVPVTVVF		C1402	9	YYYNGKAVY		C1403	9
C0102	9	YLPVGSHNL						C0303	9	LATRAIPEL		C0304	9	LADVKVHIL														C0801	9	SAFSSWEEL		C0802	9	LADENREVL		C1202	9	VAADAVASL		C1203	9	LMYPYIFHV						C1403	9
C0102	9	YMGIRDTEL						C0303	9	LATRSFPQL		C0304	9	LAEAGVRLL														C0801	9	SAFYDVDFL		C0802	9	LADERNELL		C1202	9	VAAEAFSEL		C1203	9	LQETATWLL						C1403	9
C0102	9	YMIAHITGL						C0303	9	LATSHMLEL		C0304	9	LAEFKVRAL														C0801	9	SAGPPLLAV		C0802	9	LADETLLKV		C1202	9	VAAEWRSTF		C1203	9	LQGPLRDVF						C1403	9
C0102	9	YMPMNANDL						C0303	9	LATTVRPVF		C0304	9	LAEIFGKVL														C0801	9	SAGPVGDDL		C0802	9	LADEVITVF		C1202	9	VAAGGHITF		C1203	9	LQIGVIRVY						C1403	9
C0102	9	YMPPPYASL						C0303	9	LATYGSIAL		C0304	9	LAFEGPILL														C0801	9	SAGPVGDDM		C0802	9	LADFEAGLL		C1202	9	VAALPGIVH		C1203	9	LQKEFITTY						C1403	9
C0102	9	YMSPHPSPL						C0303	9	LAVAGATSL		C0304	9	LAFGSGMGL														C0801	9	SAHIMGEAM		C0802	9	LADFSPLTL		C1202	9	VAAPASLSL		C1203	9	LSADIFQQV						C1403	9
C0102	9	YSPAGNLEL						C0303	9	LAVDKSASL		C0304	9	LAFLGSQSL														C0801	9	SAHLFEVEL		C0802	9	LADGADEHL		C1202	9	VAAPLFELY		C1203	9	LSAEVYRIL						C1403	9
C0102	9	YSPEACRSM						C0303	9	LAVEAVLRL		C0304	9	LAFNSAISL														C0801	9	SAHSHFISL		C0802	9	LADGLKVVL		C1202	9	VAASNIVQM		C1203	9	LSAGATKVY						C1403	9
C0102	9	YSPERQRSL						C0303	9	LAVEKAAEL		C0304	9	LAFPDVVSL														C0801	9	SAIDTREEL		C0802	9	LADGSIAVL		C1202	9	VADPYVVIM		C1203	9	LSAPIHTQM						C1403	9
C0102	9	YSPFGDSPL						C0303	9	LAVEPGSNL		C0304	9	LAFPGEMLL														C0801	9	SAIFNFQSL		C0802	9	LADGVVSQA		C1202	9	VAFGHHAKF		C1203	9	LSFFYPVLF						C1403	9
C0102	9	YSPGMTMSV						C0303	9	LAVGLTSCF		C0304	9	LAFPSPEKL														C0801	9	SAIFPDVAL		C0802	9	LADGYDLEI		C1202	9	VAFGSHMSF		C1203	9	LSFPHLLQT						C1403	9
C0102	9	YSPIRLLEV						C0303	9	LAVHIAHSL		C0304	9	LAFPTGCSL														C0801	9	SAIGYIHSL		C0802	9	LADHPDAPM		C1202	9	VAFKKTFSY		C1203	9	LSFPTTKTY						C1403	9
C0102	9	YSPQRERPL						C0303	9	LAVPDMSSL		C0304	9	LAFSRALEL														C0801	9	SAIHILDVL		C0802	9	LADHTVHVL		C1202	9	VAFNWIIVH		C1203	9	LSFPYSYEV						C1403	9
C0102	9	YSPVSRIGL						C0303	9	LAVPIFVAL		C0304	9	LAGPDHLSL														C0801	9	SAINQVEAL		C0802	9	LADIAQSQL		C1202	9	VAFPSSSVY		C1203	9	LSFQEVREY						C1403	9
C0102	9	YTAFSERPL						C0303	9	LAVTDTGAL		C0304	9	LAHLRAAVL														C0801	9	SAIPVTCLL		C0802	9	LADILSESL		C1202	9	VAFPVGNAF		C1203	9	LSFTHPISF						C1403	9
C0102	9	YTPEERRAL						C0303	9	LAVVVTKEM		C0304	9	LAHPNIIAL														C0801	9	SALDSTPAL		C0802	9	LADIQIEQL		C1202	9	VAFQNPQTH		C1203	9	LSHSLLVTL						C1403	9
C0102	9	YTPYGWLQL						C0303	9	LAYEPFSTL		C0304	9	LAHPYFESL														C0801	9	SALEFLTQL		C0802	9	LADKNVPNL		C1202	9	VAFSPVTEL		C1203	9	LSIPRVFYV						C1403	9
C0102	9	YVPFAERSL						C0303	9	LAYHLAVVL		C0304	9	LAHVVITQL														C0801	9	SALKAIHAL		C0802	9	LADKSVLVC		C1202	9	VAGAHVVIH		C1203	9	LSIPYRLIF						C1403	9
C0102	9	YVPNAGRGL						C0303	9	LAYIAHPKL		C0304	9	LAIDAIHQL														C0801	9	SALQIFEKL		C0802	9	LADLADFAL		C1202	9	VAGPVGGSL		C1203	9	LSKDGVLYV						C1403	9
C0102	9	YVPTSYVEV						C0303	9	LAYLQRIAL		C0304	9	LAIDSIHQL														C0801	9	SAMEVVPAL		C0802	9	LADLAKEEL		C1202	9	VAHSPPSTL		C1203	9	LSKDSILSL						C1403	9
								C0303	9	LAYMNHIMV		C0304	9	LAIESANEL														C0801	9	SANVVPEAL		C0802	9	LADLENLAF		C1202	9	VAINHIVDF		C1203	9	LSKGPGLEV						C1403	9
								C0303	9	LAYPFQSLL		C0304	9	LAIFVICQL														C0801	9	SANYTEIAL		C0802	9	LADLGLDSL		C1202	9	VAINLIVQH		C1203	9	LSPDFTFTA						C1403	9
								C0303	9	LAYPGSATI		C0304	9	LAIGPCKSL														C0801	9	SASALAVAL		C0802	9	LADLHPDVF		C1202	9	VAIPSYICY		C1203	9	LSSNVILHV						C1403	9
								C0303	9	LDNISFPKQ		C0304	9	LAIHGMETL														C0801	9	SASDWYDAL		C0802	9	LADLIEKEL		C1202	9	VAIQSVRCY		C1203	9	LSSPWYHTY						C1403	9
								C0303	9	LFVGKHHPL		C0304	9	LAIIPHVTI														C0801	9	SASESILEL		C0802	9	LADLPQQLL		C1202	9	VAKAPSLTF		C1203	9	LSSSVIREL						C1403	9
								C0303	9	LGAPPGPQL		C0304	9	LAIPFAITI														C0801	9	SASEVEVQL		C0802	9	LADLQLEYL		C1202	9	VAKAPSQAL		C1203	9	LSTHLLILY						C1403	9
								C0303	9	LGIAGITGA		C0304	9	LAIPVFLTL														C0801	9	SASEVPSEL		C0802	9	LADLQNDEV		C1202	9	VAKAVTQAL		C1203	9	LSVDLIKTY						C1403	9
								C0303	9	LGIPHSFAL		C0304	9	LAITGGVTL														C0801	9	SASGPFESH		C0802	9	LADLSELQL		C1202	9	VAKGPSHSL		C1203	9	LSVEIVHEL						C1403	9
								C0303	9	LGIPIITVL		C0304	9	LAITTEHTL														C0801	9	SASPPGPTL		C0802	9	LADMHSTEI		C1202	9	VAKHPAGSF		C1203	9	LSVPIIIKY						C1403	9
								C0303	9	LIAYMLLTI		C0304	9	LAIVPVNTL														C0801	9	SASPPPPAL		C0802	9	LADPGIITI		C1202	9	VAKIVAETM		C1203	9	LSVYLVRQL						C1403	9
								C0303	9	LIDVARTSL		C0304	9	LALAIAQEL														C0801	9	SASRVVQVV		C0802	9	LADPVFRTL		C1202	9	VAKLILVNF		C1203	9	LSYTEILKI						C1403	9
								C0303	9	LIICPLSVL		C0304	9	LALDDVAAL														C0801	9	SASSDFNTL		C0802	9	LADQMISRI		C1202	9	VAKLTGHSY		C1203	9	LSYWKPFLV						C1403	9
								C0303	9	LIISPTREL		C0304	9	LALDHLHSL														C0801	9	SATELMNIL		C0802	9	LADRNVTVL		C1202	9	VAKMGITEY		C1203	9	LTFAGVKMY						C1403	9
								C0303	9	LIIVPLSTL		C0304	9	LALELHQEL														C0801	9	SATQVYTIL		C0802	9	LADSVGHHL		C1202	9	VAKPPGWSA		C1203	9	LTFPHPVYY						C1403	9
								C0303	9	LIMDAYNSL		C0304	9	LALFPGVAL														C0801	9	SATRVYIVL		C0802	9	LADTQPAVL		C1202	9	VAKPPVMSF		C1203	9	LTIDHVPIW						C1403	9
								C0303	9	LINANMMVL		C0304	9	LALGSQMTL														C0801	9	SATSVHTSV		C0802	9	LADTRATSV		C1202	9	VAKSKLREL		C1203	9	LTINTAIVY						C1403	9
								C0303	9	LIQKPSHPL		C0304	9	LALTRSSSL														C0801	9	SAVADKHEL		C0802	9	LADVDPMQL		C1202	9	VAKTLGREF		C1203	9	LTPSHIKAY						C1403	9
								C0303	9	LIVDLCADK		C0304	9	LAMEPTPEL														C0801	9	SAVDLPVTL		C0802	9	LADVIIHEI		C1202	9	VAKTNTVSY		C1203	9	LTVPFARYL						C1403	9
								C0303	9	LIVEPSREL		C0304	9	LAMLRSLDL														C0801	9	SAVDPVAVL		C0802	9	LADVMSEQL		C1202	9	VAKTPRNTY		C1203	9	LTVPWLVEF						C1403	9
								C0303	9	LIYDGKVEM		C0304	9	LAMRPLASL														C0801	9	SAVDVHINM		C0802	9	LADVPGEIL		C1202	9	VAKWATVTF		C1203	9	LTYENVERW						C1403	9
								C0303	9	LIYGTPRAA		C0304	9	LANERLMTL														C0801	9	SAVEPSDEI		C0802	9	LAEAESRVL		C1202	9	VAKWTGDFF		C1203	9	LTYPRAVVF						C1403	9
								C0303	9	LLAALWMIL		C0304	9	LANIRSPVF														C0801	9	SAVGQFVSL		C0802	9	LAEDPKVTL		C1202	9	VALHSAVSA		C1203	9	LVIDAVREI						C1403	9
								C0303	9	LLAMPVMVL		C0304	9	LANLHITAL														C0801	9	SAVSHFFSL		C0802	9	LAEDTRTEL		C1202	9	VALLRVTPF		C1203	9	LVSQYFQTV						C1403	9
								C0303	9	LLAQPGEAL		C0304	9	LANPHELSL														C0801	9	SAVSIFHEL		C0802	9	LAEEPEAVL		C1202	9	VAMKFAQVF		C1203	9	LVYDGIRDI						C1403	9
								C0303	9	LLETGHRAL		C0304	9	LANPTTSAL														C0801	9	SAVSPSESV		C0802	9	LAEESIVCL		C1202	9	VANETGAFF		C1203	9	MAAAWPLLL						C1403	9
								C0303	9	LLFMLVLTV		C0304	9	LAQAHIQQL														C0801	9	SAVTAFVTF		C0802	9	LAEGSPRSL		C1202	9	VANPNSAIF		C1203	9	MAAERVKAW						C1403	9
								C0303	9	LLLPAGIAL		C0304	9	LAQAMETAL														C0801	9	SAVTEEAAL		C0802	9	LAEHPNVTL		C1202	9	VANSIHSLF		C1203	9	MAAGLNSIL						C1403	9
								C0303	9	LLPPPMKEL		C0304	9	LAQDIFKEL														C0801	9	SAVTICDEL		C0802	9	LAEIAKAEL		C1202	9	VANTMRTSL		C1203	9	MAANVIPVL						C1403	9
								C0303	9	LMMDPLTGL		C0304	9	LAQEIVKAL														C0801	9	SAVTTFEAL		C0802	9	LAEIAKVEL		C1202	9	VAPAAASSL		C1203	9	MAAPKVRFM						C1403	9
								C0303	9	LQSVQVFGR		C0304	9	LAQHTMLTL														C0801	9	SAVVDFEAL		C0802	9	LAEIGAVTL		C1202	9	VAPPGCSHL		C1203	9	MAAPLVLVL						C1403	9
								C0303	9	LSAPIHTQM		C0304	9	LAQPQMMVV														C0801	9	SAYAGFLAL		C0802	9	LASEPQEVL		C1202	9	VAQELPTTL		C1203	9	MAAPQIRKM						C1403	9
								C0303	9	LSAPSLHAL		C0304	9	LAQPTLLYL														C0801	9	SAYLQREEL		C0802	9	LFDEIDQAL		C1202	9	VAQEPVNTL		C1203	9	MAAPSWKCL						C1403	9
								C0303	9	LSDLHAHKL		C0304	9	LAQQAILSL														C0801	9	SGCPLFFPL		C0802	9	LGDDPTSSF		C1202	9	VAQKPRSHF		C1203	9	MAARIIAKL						C1403	9
								C0303	9	LSDPFYRTL		C0304	9	LAQVSGLEM														C0801	9	SGHLQNDTL		C0802	9	LGDLAITSL		C1202	9	VARDLRAEF		C1203	9	MAFDPTSTL						C1403	9
								C0303	9	LSDPQVHTV		C0304	9	LASAIINTL														C0801	9	SGPGPAAAL		C0802	9	LGDLSDSQL		C1202	9	VARGEIARF		C1203	9	MAFLLPLII						C1403	9
								C0303	9	LSDPTYREL		C0304	9	LASFKILAL														C0801	9	SIAGIFKEV		C0802	9	LGDVGMAEL		C1202	9	VARGNLGVY		C1203	9	MAFPKPFES						C1403	9
								C0303	9	LSEENFKVL		C0304	9	LASHILTAL														C0801	9	SICTTVLEL		C0802	9	LIDAGVDAL		C1202	9	VARLIAIFF		C1203	9	MAFYVVKMY						C1403	9
								C0303	9	LSEPMVHEL		C0304	9	LASPESLEL														C0801	9	SIEDICHVL		C0802	9	LIDDLQHCL		C1202	9	VARPDVVEM		C1203	9	MAGPLRAPL						C1403	9
								C0303	9	LSFTHPTSF		C0304	9	LASPPWRVL														C0801	9	SIEPNFHSL		C0802	9	LIDELNQAL		C1202	9	VARPPGQDF		C1203	9	MAHTGVIFF						C1403	9
								C0303	9	LSHSLLVTL		C0304	9	LASPVFARL														C0801	9	SIESIHSEM		C0802	9	LIDEMVNTI		C1202	9	VARSNILTL		C1203	9	MAINSISKL						C1403	9
								C0303	9	LSIDLFHVL		C0304	9	LASPVSPEL														C0801	9	SIIDDRVIL		C0802	9	LIDEPSAYL		C1202	9	VASAVFGVI		C1203	9	MAIPLVFQI						C1403	9
								C0303	9	LSIPSFQAL		C0304	9	LASSEWPEL														C0801	9	SILSHFQSL		C0802	9	LIDEQILCV		C1202	9	VASEIMAVL		C1203	9	MALAVRVVY						C1403	9
								C0303	9	LSIRHLMEL		C0304	9	LASVPSPAL														C0801	9	SIPEPIDPL		C0802	9	LIDESVHAL		C1202	9	VASETGHVY		C1203	9	MALEHLVVW						C1403	9
								C0303	9	LSISPRLTL		C0304	9	LATAAALTY														C0801	9	SISGITMVL		C0802	9	LIDFGSGAL		C1202	9	VASEYPVIL		C1203	9	MALGHVIVL						C1403	9
								C0303	9	LSKGPGLEV		C0304	9	LATASSPKF														C0801	9	SIVDDEATL		C0802	9	LIDIQPNTL		C1202	9	VASSILSHI		C1203	9	MANGEIHIY						C1403	9
								C0303	9	LSMVPITSL		C0304	9	LATAVIPQW														C0801	9	SIVEPKDEI		C0802	9	LIDKESASL		C1202	9	VASSLYDIL		C1203	9	MANPRELRI						C1403	9
								C0303	9	LSNHVFNAL		C0304	9	LATDAVQIL														C0801	9	SIWDGSEVL		C0802	9	LIDKPNLQF		C1202	9	VASSVNTEF		C1203	9	MAPLKMLAL						C1403	9
								C0303	9	LSQEDVKTL		C0304	9	LATDFIQSL														C0801	9	SNHLLEDSL		C0802	9	LIDKTTAAF		C1202	9	VASTITGVM		C1203	9	MAQNIFAVL						C1403	9
								C0303	9	LSQPTPATL		C0304	9	LATGAAMVL														C0801	9	SNHWQIPEL		C0802	9	LIDLHNHDL		C1202	9	VATDFFTVL		C1203	9	MAQRLVRVL						C1403	9
								C0303	9	LSQQPFLSL		C0304	9	LATHPGISF														C0801	9	SPADRQLVA		C0802	9	LIDLPGTEL		C1202	9	VATSRIIKY		C1203	9	MARETWEVL						C1403	9
								C0303	9	LSQVPMSAL		C0304	9	LATIHLPYL														C0801	9	SPFGTITSA		C0802	9	LIDLPTCEL		C1202	9	VAVCRIPVL		C1203	9	MASKILKSY						C1403	9
								C0303	9	LSSSVIREL		C0304	9	LATLIHQVL														C0801	9	SPFHFQPSA		C0802	9	LIDMYSEVL		C1202	9	VAVDGINAL		C1203	9	MATPLLMQA						C1403	9
								C0303	9	LSTLPTSTL		C0304	9	LATPPFSRL														C0801	9	SPHLGPAPA		C0802	9	LIDNPNLVI		C1202	9	VAVDPTEEY		C1203	9	MAVAFVLSL						C1403	9
								C0303	9	LSTPFGQAL		C0304	9	LATPVDLKL														C0801	9	SPHPSPLGA		C0802	9	LIDQKVYEL		C1202	9	VAVEPGAAV		C1203	9	MAVEFLHEL						C1403	9
								C0303	9	LSTTVQPNL		C0304	9	LATRAIPEL														C0801	9	SPHSQVLTA		C0802	9	LIDVARTSL		C1202	9	VAVEVVTTM		C1203	9	MAVEFPLVL						C1403	9
								C0303	9	LSVAPQQSL		C0304	9	LATRSFPQL														C0801	9	SPIENIQRV		C0802	9	LKDNPNQSL		C1202	9	VAVHVFSEF		C1203	9	MAVPATVIY						C1403	9
								C0303	9	LSVEIVHEL		C0304	9	LATSHMLEL														C0801	9	SPKQILDPA		C0802	9	LLDATQHTL		C1202	9	VAVHVVDFF		C1203	9	MAVYLVKQL						C1403	9
								C0303	9	LSYGPGPSL		C0304	9	LATWATKEL														C0801	9	SPLKHFVTA		C0802	9	LLDDKAQAL		C1202	9	VAVNKPAEF		C1203	9	MAWDLPSVL						C1403	9
								C0303	9	LTDGHPLTL		C0304	9	LAVAGATSL														C0801	9	SPLSAARAA		C0802	9	LLDEPTNML		C1202	9	VAVPVAVTF		C1203	9	MAYAGARFV						C1403	9
								C0303	9	LTDPDIHVL		C0304	9	LAVDGLMEM														C0801	9	SPNRYWLCA		C0802	9	LLDFPNIVI		C1202	9	VAVSMLNVY		C1203	9	MAYARQIYI						C1403	9
								C0303	9	LTHGINFAV		C0304	9	LAVDKSASL														C0801	9	SPRVPNSSV		C0802	9	LLDGSNVVF		C1202	9	VAWVGQQVH		C1203	9	MAYLKIQKY						C1403	9
								C0303	9	LTHTAVVPL		C0304	9	LAVDTQLLL														C0801	9	SPVTDFREA		C0802	9	LLDLGEVAL		C1202	9	VAYDSKQYY		C1203	9	MAYLYPLQW						C1403	9
								C0303	9	LTMAPGSTL		C0304	9	LAVEAVLRL														C0801	9	SPYHNFDSV		C0802	9	LLDMPAAEL		C1202	9	VAYGKGTYF		C1203	9	MAYPDLNEI						C1403	9
								C0303	9	LTTASLPLL		C0304	9	LAVEKAAEL														C0801	9	SQDPGTHVV		C0802	9	LLDPDTAVL		C1202	9	VAYMNPIAM		C1203	9	MAYPSLVAM						C1403	9
								C0303	9	LTTEVHPEL		C0304	9	LAVEPGSNL														C0801	9	SSAKPGPAL		C0802	9	LLDSPGKVL		C1202	9	VAYPCAILY		C1203	9	MAYSNLLRA						C1403	9
								C0303	9	LTVDPQGAL		C0304	9	LAVEYVDSL														C0801	9	SSAPPLSEL		C0802	9	LLDSRVMEL		C1202	9	VAYQHAFLY		C1203	9	MAYWKSVIL						C1403	9
								C0303	9	LTVEPGASL		C0304	9	LAVHIAHSL														C0801	9	SSDGHEFIV		C0802	9	LLDSSHSEL		C1202	9	VAYSHPTTV		C1203	9	MGFSGIVVH						C1403	9
								C0303	9	LTYMPSVSL		C0304	9	LAVNLTRVL														C0801	9	SSDPKVLTL		C0802	9	LLDTVNNVF		C1202	9	VAYVSSVAL		C1203	9	MLFGHPLLV						C1403	9
								C0303	9	LVFPGFFEL		C0304	9	LAVPDMSSL														C0801	9	SSHFLEQTL		C0802	9	LLDVAPLSL		C1202	9	VGAPVEVTH		C1203	9	MQFSKPRKL						C1403	9
								C0303	9	LVIGRVLEL		C0304	9	LAVVVTKEM														C0801	9	SSHLLSLTL		C0802	9	LLDVPTAAV		C1202	9	VGIDLGTTY		C1203	9	MQISFIHQL						C1403	9
								C0303	9	LVITASQSL		C0304	9	LAYDTQLVL														C0801	9	SSHTLLQVL		C0802	9	LLDVTPLSL		C1202	9	VGVPSAPVL		C1203	9	MSADVPLVV						C1403	9
								C0303	9	LVLAPTREL		C0304	9	LAYEPFSTL														C0801	9	SSHVQQQAL		C0802	9	LLDYPNNLL		C1202	9	VIAPIISNF		C1203	9	MSCEVLRVL						C1403	9
								C0303	9	LVLTPTREL		C0304	9	LAYHLAVVL														C0801	9	SSHYLLCAL		C0802	9	LLDYPNNVL		C1202	9	VIFAGGQAY		C1203	9	MSFENQVKY						C1403	9
								C0303	9	LVNGKSLEL		C0304	9	LAYIAHPKL														C0801	9	SSNWQKEAM		C0802	9	LMDNPSLAF		C1202	9	VIGDVIRVY		C1203	9	MSFGNVVEL						C1403	9
								C0303	9	LVTDIQPVL		C0304	9	LAYIHLIEF														C0801	9	SSPQAGSSL		C0802	9	LMDPPGTAL		C1202	9	VIIDDRHVY		C1203	9	MSIPFRSAY						C1403	9
								C0303	9	LVVYPWTQR		C0304	9	LAYLQRIAL														C0801	9	STADVYCKL		C0802	9	LNDLQANSL		C1202	9	VIIDNLQFM		C1203	9	MSLHFLILY						C1403	9
								C0303	9	LYDASFETK		C0304	9	LAYMNHIMV														C0801	9	STAGPSEAL		C0802	9	LNDPNKEAL		C1202	9	VIIGARAEM		C1203	9	MSVEVRQTL						C1403	9
								C0303	9	LYDATYETK		C0304	9	LAYPGSATI														C0801	9	STCEAVMIL		C0802	9	LNDVSNHTL		C1202	9	VIIKGTQVY		C1203	9	MSVTKVVVH						C1403	9
								C0303	9	MAAMVLTSL		C0304	9	LAYTGFVKL														C0801	9	STIGTYATL		C0802	9	LPINGNGKQ		C1202	9	VIKDAIASL		C1203	9	MSVYLVRQL						C1403	9
								C0303	9	MAANVIPVL		C0304	9	LCHPHIIRL														C0801	9	STSAPGPAL		C0802	9	LQADYASQA		C1202	9	VIKEITQEM		C1203	9	MSYAEVMRL						C1403	9
								C0303	9	MAAPLVLVL		C0304	9	LGIPHSFAL														C0801	9	STYDGAETL		C0802	9	LQDFAQVTL		C1202	9	VIKEKGLEH		C1203	9	MSYEQLMQL						C1403	9
								C0303	9	MAARVGAFL		C0304	9	LGIPIITVL														C0801	9	SVCDILLAL		C0802	9	LQDFSQVTL		C1202	9	VIKEQNREL		C1203	9	MSYPAKVTL						C1403	9
								C0303	9	MADPNIRFL		C0304	9	LGIPISNIL														C0801	9	SVCDYFFEA		C0802	9	LQDLTFVHL		C1202	9	VIKESGPPH		C1203	9	MTFPGERIY						C1403	9
								C0303	9	MAFDPTSTL		C0304	9	LGSPWAVEL														C0801	9	SVDDTIVAL		C0802	9	LQDQLRVAL		C1202	9	VIKETQERY		C1203	9	MTKDFEPIL						C1403	9
								C0303	9	MAIHAAAVL		C0304	9	LGYTSGLSL														C0801	9	SVDPTRLLL		C0802	9	LSDDEIVSL		C1202	9	VIKETTREM		C1203	9	MTPEIIQKL						C1403	9
								C0303	9	MAISKPRNL		C0304	9	LIDVARTSL														C0801	9	SVDSHFCHL		C0802	9	LSDDGKASL		C1202	9	VILPPLSPY		C1203	9	MTSNIVQCL						C1403	9
								C0303	9	MAIVGGMAL		C0304	9	LIMDAYNSL														C0801	9	SVDSHFQEV		C0802	9	LSDDHVLIL		C1202	9	VINGNIKTV		C1203	9	MTTEILRSM						C1403	9
								C0303	9	MAKRFAYPL		C0304	9	LINANMMVL														C0801	9	SVIGHHETL		C0802	9	LSDDIKESL		C1202	9	VIPENTVIY		C1203	9	MTYERILYI						C1403	9
								C0303	9	MALGHVIVL		C0304	9	LIVDRPVTL														C0801	9	SVVDVFAQL		C0802	9	LSDDPTVSA		C1202	9	VIRDEVEKY		C1203	9	MVFPKPVTA						C1403	9
								C0303	9	MALPPCHAL		C0304	9	LIVDSVKEL														C0801	9	SVVKEMLEL		C0802	9	LSDEENLKL		C1202	9	VIRDFAGPY		C1203	9	MVVDIVQEL						C1403	9
								C0303	9	MAMAYGSSL		C0304	9	LIVEPSREL														C0801	9	TAAAVNLLL		C0802	9	LSDEHAGVI		C1202	9	VIRELKEQY		C1203	9	MVYGGVRIV						C1403	9
								C0303	9	MANGAVIHL		C0304	9	LIYDGKVEM														C0801	9	TAADDHQAL		C0802	9	LSDELRISL		C1202	9	VIRGNIVKH		C1203	9	NAAFALKQY						C1403	9
								C0303	9	MANPQMQQL		C0304	9	LIYEDSIVL														C0801	9	TAAPPAQPL		C0802	9	LSDETLLEI		C1202	9	VIRHITVVH		C1203	9	NAAKILPIM						C1403	9
								C0303	9	MANPTALLL		C0304	9	LIYGTPRAA														C0801	9	TAAPTIGVL		C0802	9	LSDGVVVQV		C1202	9	VIVSTRSPY		C1203	9	NAAKVHLMV						C1403	9
								C0303	9	MAPLKMLAL		C0304	9	LKETRAFPI														C0801	9	TAAPTVCLL		C0802	9	LSDHIQEEL		C1202	9	VLGPAEAHY		C1203	9	NAARWPWVL						C1403	9
								C0303	9	MASPMSIPT		C0304	9	LLAMPVMVL														C0801	9	TAAPVPTTL		C0802	9	LSDIKGSVL		C1202	9	VLIDVGTGY		C1203	9	NAATILVFF						C1403	9
								C0303	9	MATAEAQSL		C0304	9	LLAQPGEAL														C0801	9	TAAPVQETL		C0802	9	LSDISKIDL		C1202	9	VLREIAEEY		C1203	9	NAAVTVLRV						C1403	9
								C0303	9	MATESILHF		C0304	9	LLLAHIIAL														C0801	9	TAASPTIAL		C0802	9	LSDLAHFSL		C1202	9	VMINKATPY		C1203	9	NAFAGLLKL						C1403	9
								C0303	9	MAVAFVLSL		C0304	9	LLLPAGIAL														C0801	9	TACDIQTHM		C0802	9	LSDLALHFL		C1202	9	VQGPVGTDF		C1203	9	NAFASVILF						C1403	9
								C0303	9	MAVGGGLAV		C0304	9	LLPEHFLFL														C0801	9	TADDFLVFL		C0802	9	LSDLCGTVM		C1202	9	VSAGIQTSF		C1203	9	NAFEAPLTF						C1403	9
								C0303	9	MAYFPAISL		C0304	9	LLSLPATPL														C0801	9	TADDPSLSL		C0802	9	LSDLLEQTL		C1202	9	VSHIMLESY		C1203	9	NAFEELVAF						C1403	9
								C0303	9	MAYPSLVAM		C0304	9	LLVDHFMEL														C0801	9	TADEVHYFL		C0802	9	LSDLQVIKI		C1202	9	VSHLIATEY		C1203	9	NAFKEITTM						C1403	9
								C0303	9	MIIENFEAL		C0304	9	LMEAVAVLV														C0801	9	TADGAHFEL		C0802	9	LSDLRVIDL		C1202	9	VSKPSAPVF		C1203	9	NAFLLPIKT						C1403	9
								C0303	9	MSDTTFKAL		C0304	9	LMMDPLTGL														C0801	9	TADGDLYTL		C0802	9	LSDLTGSLL		C1202	9	VSPDAKTSL		C1203	9	NAFMKAVEL						C1403	9
								C0303	9	MSLPSGSSL		C0304	9	LNAAPRIAL														C0801	9	TADGMVHLL		C0802	9	LSDPFYRTL		C1202	9	VSRDTIAIH		C1203	9	NAFNNSIIP						C1403	9
								C0303	9	MSMDASPEL		C0304	9	LPINGNGKQ														C0801	9	TADSYLLQL		C0802	9	LSDPIVNTL		C1202	9	VSRVPTRSL		C1203	9	NAFPEIFYT						C1403	9
								C0303	9	MSSPLSKEL		C0304	9	LSAPIHTQM														C0801	9	TAHFEQNTL		C0802	9	LSDPQVHTV		C1202	9	VSSDVQSVF		C1203	9	NAFQWAIKA						C1403	9
								C0303	9	MSVEVRQTL		C0304	9	LSAPSLHAL														C0801	9	TAHVMPSTL		C0802	9	LSDPTYREL		C1202	9	VSSPTVQVF		C1203	9	NAFRIIKEV						C1403	9
								C0303	9	MSVHLSPCF		C0304	9	LSDDHVLIL														C0801	9	TAHWLNTVL		C0802	9	LSDPVHLTV		C1202	9	VSTEPGKEY		C1203	9	NAFSFPSEI						C1403	9
								C0303	9	MSVQPTVSL		C0304	9	LSDPFYRTL														C0801	9	TAIDDRCEL		C0802	9	LSDQSSVTL		C1202	9	VSVPFPVTH		C1203	9	NAFSGVMML						C1403	9
								C0303	9	MTIEPFISL		C0304	9	LSDPQVHTV														C0801	9	TAIDVQVGL		C0802	9	LSDTGISAL		C1202	9	VTFEKQWFY		C1203	9	NAFTMPLHM						C1403	9
								C0303	9	MTTAFIHAL		C0304	9	LSDPTYREL														C0801	9	TAIEAQHLL		C0802	9	LSDTPNNHF		C1202	9	VTKDPGVGM		C1203	9	NAFWKCVQA						C1403	9
								C0303	9	MVIVPTREL		C0304	9	LSEPMVHEL														C0801	9	TAIPVTQEL		C0802	9	LSDTVRTVL		C1202	9	VTKGNIAQM		C1203	9	NAIEDTIFY						C1403	9
								C0303	9	MVMEKPSPL		C0304	9	LSFNPLTSL														C0801	9	TAISLFYEL		C0802	9	LSDVPTKCI		C1202	9	VTKPANSVF		C1203	9	NAIEHVIIP						C1403	9
								C0303	9	MVNPVIYAL		C0304	9	LSFTHPTSF														C0801	9	TALAIYHVI		C0802	9	LSDYDILSL		C1202	9	VTKPVGGNY		C1203	9	NAIEKVFKV						C1403	9
								C0303	9	MVVGTGTSL		C0304	9	LSFWWPLAL														C0801	9	TALNLFFKL		C0802	9	LSDYGPPSL		C1202	9	VTNTIISHY		C1203	9	NAIETMPCV						C1403	9
								C0303	9	NAATSFQVL		C0304	9	LSHSLLVTL														C0801	9	TALSFFHML		C0802	9	LSEEQCREL		C1202	9	VTQIPQEEH		C1203	9	NAIGVLIYM						C1403	9
								C0303	9	NADPIAKYL		C0304	9	LSIDLFHVL														C0801	9	TAMDAQEAL		C0802	9	LSEHPNVTL		C1202	9	VTRPVPLEH		C1203	9	NAKDFFRVL						C1403	9
								C0303	9	NADPNMKLF		C0304	9	LSIEQLTTL														C0801	9	TAPQGNVDL		C0802	9	LSYLEKEAL		C1202	9	VTSPVLVIH		C1203	9	NALDKVLSV						C1403	9
								C0303	9	NAFSGVMML		C0304	9	LSIPSFQAL														C0801	9	TAQILLKAL		C0802	9	LTDDGNKWL		C1202	9	VTYVPVTTF		C1203	9	NAMDVVVQF						C1403	9
								C0303	9	NAIEGGTQL		C0304	9	LSKDSILSL														C0801	9	TASEMILVL		C0802	9	LTDDGRVFL		C1202	9	VVAGIKEYF		C1203	9	NAMGKQWHV						C1403	9
								C0303	9	NAINITSAL		C0304	9	LSKGPGLEV														C0801	9	TASEVLDSL		C0802	9	LTDDHVQFL		C1202	9	VVAPITTGY		C1203	9	NAMGYVRMI						C1403	9
								C0303	9	NAIREVLEL		C0304	9	LSLPRASSL														C0801	9	TASPVAVSL		C0802	9	LTDEDTRNL		C1202	9	VVIRQRKSY		C1203	9	NAMPHIKTY						C1403	9
								C0303	9	NAISIHHAL		C0304	9	LSMERMVPA														C0801	9	TASPVIKAV		C0802	9	LTDEGVVAL		C1202	9	VVITKVVTH		C1203	9	NASPINRIV						C1403	9
								C0303	9	NALFHASTL		C0304	9	LSMVPITSL														C0801	9	TASQVYETL		C0802	9	LTDEQIHHL		C1202	9	VVKMPSGEF		C1203	9	NASPVISSV						C1403	9
								C0303	9	NAMECALHL		C0304	9	LSNHVFNAL														C0801	9	TAVAPNVAL		C0802	9	LTDEQRNEL		C1202	9	VVKPPGQDL		C1203	9	NAVGVPIKV						C1403	9
								C0303	9	NASPVISSV		C0304	9	LSQDPVLEL														C0801	9	TAVAVFEIL		C0802	9	LTDESLSSL		C1202	9	VVKPPGSSL		C1203	9	NAVHWQPVF						C1403	9
								C0303	9	NAVPLFLRL		C0304	9	LSQPILLEL														C0801	9	TAYDNFVEL		C0802	9	LTDGHPLTL		C1202	9	VVNGKVEYF		C1203	9	NAVNLAIKY						C1403	9
								C0303	9	NAVWALSNL		C0304	9	LSQPTPATL														C0801	9	TAYLDGVSL		C0802	9	LTDGPNERI		C1202	9	VVPQFVVFY		C1203	9	NAYAFLTLY						C1403	9
								C0303	9	NGIFPGTPL		C0304	9	LSQQPFLSL														C0801	9	TIANPTDVL		C0802	9	LTDIHGNVL		C1202	9	VVQEPGQVF		C1203	9	NAYEFIMKL						C1403	9
								C0303	9	NIYAANPVI		C0304	9	LSQVPMSAL														C0801	9	TIDADAPEL		C0802	9	LTDKSCQSF		C1202	9	VVYENVSHF		C1203	9	NAYPSPLGY						C1403	9
								C0303	9	NRDVLELIK		C0304	9	LSQVRFLVL														C0801	9	TIDPIPHQL		C0802	9	LTDRDLCEL		C1202	9	VVYPWTQRF		C1203	9	NAYPSPQLL						C1403	9
								C0303	9	NSNPVIAEL		C0304	9	LSSLPLNSL														C0801	9	TIFKDHVSL		C0802	9	LTDSPKPAL		C1202	9	WARPLSVSF		C1203	9	NAYPYCRTI						C1403	9
								C0303	9	NTIDPSHPM		C0304	9	LSSPPTESL														C0801	9	TIIEATHVL		C0802	9	LTDTEIMTL		C1202	9	YAAASHSYY		C1203	9	NAYQRAILL						C1403	9
								C0303	9	NVLDHFSEL		C0304	9	LSSPVAQML														C0801	9	TLCDVILMV		C0802	9	LTDTPDTTA		C1202	9	YAAGALTVH		C1203	9	NAYTGIVLL						C1403	9
								C0303	9	QAIENAHVL		C0304	9	LSSSVIREL														C0801	9	TNHLHQTPL		C0802	9	LTDVGFTTL		C1202	9	YAAGVHSVL		C1203	9	NFFPGVFEY						C1403	9
								C0303	9	QAIPVTSEL		C0304	9	LSTPFGQAL														C0801	9	TPAHVLPSA		C0802	9	LTDVMLHAL		C1202	9	YAALHGEFY		C1203	9	NIFSEVRVY						C1403	9
								C0303	9	QAIRAGLEL		C0304	9	LSTPYIHSL														C0801	9	TPKPPGTGP		C0802	9	LTDVNVVAV		C1202	9	YAALPGQQH		C1203	9	NIICGITSV						C1403	9
								C0303	9	QAISVVGSL		C0304	9	LSTTVQPNL														C0801	9	TPSAAALAA		C0802	9	LTEDPHTVL		C1202	9	YAANLKNVM		C1203	9	NIIDLVKKY						C1403	9
								C0303	9	QALPWISIL		C0304	9	LSTVVSPVI														C0801	9	TSAAIYHVL		C0802	9	LVDAPCSDL		C1202	9	YAANPGQLF		C1203	9	NIKAPKISM						C1403	9
								C0303	9	QAMPTLIEL		C0304	9	LSVAPQQSL														C0801	9	TSAPITCEL		C0802	9	LVDDHFVEL		C1202	9	YAAQNRQEF		C1203	9	NIPSFAPVL						C1403	9
								C0303	9	QSISPGSRL		C0304	9	LSVEIVHEL														C0801	9	TSDPLELFL		C0802	9	LVDDLVDSL		C1202	9	YAFDFARQS		C1203	9	NIRLRLEEY						C1403	9
								C0303	9	QSITPCLAL		C0304	9	LSVGSPSVL														C0801	9	TSNVITESL		C0802	9	LVDEAKNYL		C1202	9	YAFGGGCEL		C1203	9	NIYAANPVI						C1403	9
								C0303	9	QTLEDFKEL		C0304	9	LSVISSPQL														C0801	9	TSVPPGSAL		C0802	9	LVDENFTEL		C1202	9	YAFGSCINH		C1203	9	NMYGKVVTV						C1403	9
								C0303	9	QTQHPRMPL		C0304	9	LSVRPQTAL														C0801	9	TTDDSICVL		C0802	9	LVDGPCTQV		C1202	9	YAFNGTQRF		C1203	9	NMYIFPVHW						C1403	9
								C0303	9	RAHSEPLAL		C0304	9	LTAEHFAAL														C0801	9	TTDGYLLRL		C0802	9	LVDGQIFCL		C1202	9	YAFPKAVSV		C1203	9	NNPQFVWVV						C1403	9
								C0303	9	RAIDFSPYL		C0304	9	LTDGHPLTL														C0801	9	TTMVPTAAL		C0802	9	LVDPDTAVL		C1202	9	YAFPKAVTV		C1203	9	NQIPFIIQY						C1403	9
								C0303	9	RAIEIYTDM		C0304	9	LTDPDIHVL														C0801	9	TTSPVLPSL		C0802	9	LVDRSCTVL		C1202	9	YAFPKSITV		C1203	9	NSFGFPQYV						C1403	9
								C0303	9	RAIELATTL		C0304	9	LTFNPSSAL														C0801	9	TVCHVVIVV		C0802	9	LVDSSGHSV		C1202	9	YAFPLAHSL		C1203	9	NSFGQRVYF						C1403	9
								C0303	9	RAIQFYLEF		C0304	9	LTFPPATAL														C0801	9	TVDGSPHEL		C0802	9	LVDTPPSAL		C1202	9	YAFPVGLTH		C1203	9	NSFIHVIMY						C1403	9
								C0303	9	RALDHYLTL		C0304	9	LTIEKISAL														C0801	9	TVIDYFHQL		C0802	9	LVDVVTGQL		C1202	9	YAFVRPVIL		C1203	9	NSFPQKISY						C1403	9
								C0303	9	RALEHFTDL		C0304	9	LTIPASLDL														C0801	9	TVKGVSLSS		C0802	9	LVEDLSESL		C1202	9	YAHFPINVV		C1203	9	NSFPQVILL						C1403	9
								C0303	9	RALNVFYYL		C0304	9	LTLKHVKAL														C0801	9	TVKPPTSVA		C0802	9	LVEPPPMSL		C1202	9	YAIDNPLHY		C1203	9	NSIGIIRCY						C1403	9
								C0303	9	RATPHFSGL		C0304	9	LTLRPGVSL														C0801	9	TVTTVILEV		C0802	9	LWDEVLSHL		C1202	9	YAISKPEVL		C1203	9	NSSPVINHL						C1403	9
								C0303	9	RAVAPTMSL		C0304	9	LTMLPRLVL														C0801	9	TVYEGFISA		C0802	9	MADAGILRL		C1202	9	YAKAGCQVV		C1203	9	NSSSIIQVM						C1403	9
								C0303	9	RAVEVSAEL		C0304	9	LTTDISLIF														C0801	9	TVYGGSDEL		C0802	9	MADEAGLDL		C1202	9	YAKDDPLEF		C1203	9	NSTYIMRVL						C1403	9
								C0303	9	RAVPVGSGL		C0304	9	LTTEVHPEL														C0801	9	VAAAHSVVL		C0802	9	MADGNQAQL		C1202	9	YAKDGRVSY		C1203	9	NSYPHQLYT						C1403	9
								C0303	9	RAYAKFYTL		C0304	9	LTVEPGASL														C0801	9	VAAAVDLII		C0802	9	MADIGGHAI		C1202	9	YAKDMLTSL		C1203	9	NTINLIHTF						C1403	9
								C0303	9	RGTKVILHL		C0304	9	LTYMPSVSL														C0801	9	VAAAVPVII		C0802	9	MADIPGHVF		C1202	9	YAKDYTKAL		C1203	9	NTIPFIIRY						C1403	9
								C0303	9	RIPSFVTEL		C0304	9	LVFPGFFEL														C0801	9	VAAAYADEL		C0802	9	MADKCSPTL		C1202	9	YAKEAQQSL		C1203	9	NTIPLAVVL						C1403	9
								C0303	9	RTIGFFYTL		C0304	9	LVIGRVLEL														C0801	9	VAADAVASL		C0802	9	MADLEGLHL		C1202	9	YAKIVEIPF		C1203	9	NTKEPPLSL						C1403	9
								C0303	9	RTMEIFQLL		C0304	9	LVINIIHSL														C0801	9	VAAEAFSEL		C0802	9	MADLEQKVL		C1202	9	YAKNNIPII		C1203	9	NTMHLLIKY						C1403	9
								C0303	9	RTVDLFPVL		C0304	9	LVISDGSSL														C0801	9	VAAGVLCEL		C0802	9	MADPEVQQI		C1202	9	YAMDELRSL		C1203	9	NTSEIILIL						C1403	9
								C0303	9	RVIDVGSEW		C0304	9	LVLVPTREL														C0801	9	VAAPASLSL		C0802	9	MADSDFLAL		C1202	9	YANAKIYKL		C1203	9	NVKEMWTEV						C1403	9
								C0303	9	SAACPGLQL		C0304	9	LVNGKSLEL														C0801	9	VAATVYCML		C0802	9	MADTFLEHM		C1202	9	YANDFASEY		C1203	9	NVPVFWPIL						C1403	9
								C0303	9	SAAENFLVL		C0304	9	LVNPEGPTL														C0801	9	VAAYEFTTL		C0802	9	MAEERAESL		C1202	9	YANEVGEAF		C1203	9	NVYPEEMIV						C1403	9
								C0303	9	SAAFPGASL		C0304	9	LVPALTDDS														C0801	9	VACGAFHSL		C0802	9	MAEIFGTEL		C1202	9	YANSKAVTL		C1203	9	PHFSFSTLP						C1403	9
								C0303	9	SAAGPGFSL		C0304	9	LVTDIQPVL														C0801	9	VACGANHTL		C0802	9	MAESPSRDV		C1202	9	YARDETEFY		C1203	9	PIRLLAAAA						C1403	9
								C0303	9	SAAMPGASL		C0304	9	LVVDKAMEL														C0801	9	VACGASHVL		C0802	9	MAETKGVAL		C1202	9	YARTDGKVF		C1203	9	PSIVHRKCF						C1403	9
								C0303	9	SAAMVFSAL		C0304	9	MAAAALTSL														C0801	9	VACGLNHTL		C0802	9	MGDDYILDL		C1202	9	YARVVGSEY		C1203	9	QAADFALKV						C1403	9
								C0303	9	SAANIQPIF		C0304	9	MAAAMPLAL														C0801	9	VACGSAHTL		C0802	9	MIDERQQEL		C1202	9	YASDCASFF		C1203	9	QAADSILVL						C1403	9
								C0303	9	SAAPEGVPL		C0304	9	MAAMVLTSL														C0801	9	VACGSYHSL		C0802	9	MIDETRNSL		C1202	9	YASGAAAYY		C1203	9	QAADTVVIF						C1403	9
								C0303	9	SAAPPGLEA		C0304	9	MAANVIPVL														C0801	9	VACITEQVL		C0802	9	MIDRDNSVF		C1202	9	YASGKISQF		C1203	9	QAAGILLRL						C1403	9
								C0303	9	SAAPRTVAL		C0304	9	MADPNIRFL														C0801	9	VACLDKNEL		C0802	9	MLDEPTNHL		C1202	9	YASNITSVL		C1203	9	QACGITAVL						C1403	9
								C0303	9	SAAPTFLLL		C0304	9	MAEPFTKAL														C0801	9	VACPPMYHL		C0802	9	MLDFENQTL		C1202	9	YASSPGGVY		C1203	9	QAFGGLLVA						C1403	9
								C0303	9	SAAQPGVAF		C0304	9	MAEPNAKFI														C0801	9	VACRAIGIL		C0802	9	MLDFYSDKN		C1202	9	YASSPGMSL		C1203	9	QAFHEQIVI						C1403	9
								C0303	9	SAASLYPVL		C0304	9	MAFDPTSTL														C0801	9	VADDTPVLL		C0802	9	MLDLQGAAL		C1202	9	YATFIVTNY		C1203	9	QAFLEAVQF						C1403	9
								C0303	9	SACDALRTL		C0304	9	MAGPLRAPL														C0801	9	VADEGICYL		C0802	9	MNDDARTEL		C1202	9	YATIILSKM		C1203	9	QAFLIAIVV						C1403	9
								C0303	9	SADSLEHVL		C0304	9	MAIAPNVTV														C0801	9	VADFQRYIL		C0802	9	MNDDITTSL		C1202	9	YAVAHAVTE		C1203	9	QAFPGLLQL						C1403	9
								C0303	9	SAFDHFASV		C0304	9	MAINSISKL														C0801	9	VADGLITTL		C0802	9	MNDGPHSAL		C1202	9	YAVDRAITH		C1203	9	QAFPLIIKL						C1403	9
								C0303	9	SAFDRCATL		C0304	9	MAISGVPVL														C0801	9	VADGYPVRL		C0802	9	MNDMTAVAL		C1202	9	YAVPALEAH		C1203	9	QAFSRVQIY						C1403	9
								C0303	9	SAFGYFITA		C0304	9	MAISKPRNL														C0801	9	VADHPFLFL		C0802	9	MPDSAAALL		C1202	9	YAYEKPHVV		C1203	9	QAGPINREM						C1403	9
								C0303	9	SAFPFPVTV		C0304	9	MAIVGGMAL														C0801	9	VADKILWEI		C0802	9	MQDIVLNEV		C1202	9	YAYPATAAA		C1203	9	QAIAIPVTV						C1403	9
								C0303	9	SAFPHLRVL		C0304	9	MALGHVIVL														C0801	9	VADNLAIQL		C0802	9	MQDMVKDAL		C1202	9	YGAEALERM		C1203	9	QAIENAHVL						C1403	9
								C0303	9	SAHSHFISL		C0304	9	MALLFLLPL														C0801	9	VADNRIQEL		C0802	9	MSDLPVKVI		C1202	9	YGYEHILTL		C1203	9	QAIERYLVV						C1403	9
								C0303	9	SAIAEPSSL		C0304	9	MAMAYGSSL														C0801	9	VADPDNPLV		C0802	9	MSDTTFKAL		C1202	9	YGYGHESEL		C1203	9	QAIGAIRTL						C1403	9
								C0303	9	SAIASTKVM		C0304	9	MANGAVIHL														C0801	9	VADPETRTV		C0802	9	MTDDKITEV		C1202	9	YIAAFLSHF		C1203	9	QAINNAITY						C1403	9
								C0303	9	SAIDRIFTL		C0304	9	MANPQMQQL														C0801	9	VADPIIYVL		C0802	9	MTDGAQQAL		C1202	9	YIISGLTGF		C1203	9	QAIQWILHY						C1403	9
								C0303	9	SAIFNFQSL		C0304	9	MASGHFAFL														C0801	9	VADPTPFHI		C0802	9	MTDPEMVEV		C1202	9	YIKDRTLPF		C1203	9	QAITLVTQY						C1403	9
								C0303	9	SAIFPDVAL		C0304	9	MASLGALAL														C0801	9	VADPVEAVL		C0802	9	MVDDRLVTM		C1202	9	YIKEPKSVF		C1203	9	QALPQVRLY						C1403	9
								C0303	9	SAIGLPVCL		C0304	9	MATAEAQSL														C0801	9	VADPYVVIM		C0802	9	MVDENFSTL		C1202	9	YIKEYVTCH		C1203	9	QALPWVRYI						C1403	9
								C0303	9	SAIGPFSGL		C0304	9	MATESILHF														C0801	9	VADRLLVEL		C0802	9	MVDERTDYL		C1202	9	YIRDLALEY		C1203	9	QAMGSFLSV						C1403	9
								C0303	9	SAIGRAMEL		C0304	9	MAVGGGLAV														C0801	9	VADRLMLEL		C0802	9	MVDGKPVNL		C1202	9	YIRGGIVSQ		C1203	9	QASEEILKV						C1403	9
								C0303	9	SAIGYIHSL		C0304	9	MAYFPAISL														C0801	9	VADTVARVL		C0802	9	MVEEIGVEL		C1202	9	YISDHMKVH		C1203	9	QASPFVLRA						C1403	9
								C0303	9	SAIHVLASL		C0304	9	MAYPSLVAM														C0801	9	VADTVYRAL		C0802	9	NADAIVVKL		C1202	9	YLADIFTKL		C1203	9	QASPLQILV						C1403	9
								C0303	9	SAIIFETPL		C0304	9	MAYVSGLSF														C0801	9	VAEDKFITL		C0802	9	NADETPICL		C1202	9	YLAPHVRTL		C1203	9	QATELVHQL						C1403	9
								C0303	9	SAILRSPAF		C0304	9	MGMVAGTTM														C0801	9	VAEERGAVL		C0802	9	NADFAKLFL		C1202	9	YLLPHILVY		C1203	9	QATPLLHAL						C1403	9
								C0303	9	SAINQVEAL		C0304	9	MIIEDPAAL														C0801	9	VAEEVNAIL		C0802	9	NADGKIISL		C1202	9	YNFEKPVVM		C1203	9	QAVAIFTVY						C1403	9
								C0303	9	SAIPHPLIM		C0304	9	MIIENFEAL														C0801	9	VAEGGKAEL		C0802	9	NADHTTLLL		C1202	9	YQADIERMY		C1203	9	QAVDYIKKL						C1403	9
								C0303	9	SAIPWGISA		C0304	9	MILIPGQTL														C0801	9	VAEGPGAEL		C0802	9	NADIAVVEM		C1202	9	YQFTGIKKY		C1203	9	QAVGAVLSL						C1403	9
								C0303	9	SAIYGALTL		C0304	9	MPMMPGPPM														C0801	9	VAEHHVATL		C0802	9	NADIFRGLT		C1202	9	YSADGHSIL		C1203	9	QAVGIILHY						C1403	9
								C0303	9	SALEKFVEL		C0304	9	MSDTTFKAL														C0801	9	VAESGLPAL		C0802	9	NADISGMKV		C1202	9	YSFDPVGSY		C1203	9	QAVNFPFLV						C1403	9
								C0303	9	SALEKSLAV		C0304	9	MSSDVFPLL														C0801	9	VAFSPVTEL		C0802	9	NADISQSLL		C1202	9	YSGARPLSH		C1203	9	QAVQIINYI						C1403	9
								C0303	9	SALGKSPWL		C0304	9	MSSPLSKEL														C0801	9	VAGPALEAL		C0802	9	NADLFRGTL		C1202	9	YSKDQLQTF		C1203	9	QAYPEVRIV						C1403	9
								C0303	9	SALGVGLAL		C0304	9	MSVEVRQTL														C0801	9	VAGPVGGSL		C0802	9	NADLINRVL		C1202	9	YSKLPGVSL		C1203	9	QAYPTTVVF						C1403	9
								C0303	9	SALHYAVEL		C0304	9	MSVQPTVSL														C0801	9	VAHSPPSTL		C0802	9	NADLIQVAF		C1202	9	YSMISVVGF		C1203	9	QAYQEAFEI						C1403	9
								C0303	9	SALNVRLFL		C0304	9	MTIENMNHL														C0801	9	VAHTSLDAL		C0802	9	NADLPIATA		C1202	9	YSNGFCTVY		C1203	9	QAYSGIQQY						C1403	9
								C0303	9	SAMEVVPAL		C0304	9	MTQQPRPVL														C0801	9	VAIKAGTTL		C0802	9	NADLRPSKL		C1202	9	YSRYPPREY		C1203	9	QGFPNRVVF						C1403	9
								C0303	9	SAMKAVTEL		C0304	9	MVADKFTEL														C0801	9	VAILDINRL		C0802	9	NADPASHEI		C1202	9	YTFGRIVIY		C1203	9	QLLPFLVRY						C1403	9
								C0303	9	SAMKHMVIL		C0304	9	MVIVPTREL														C0801	9	VAISECHTL		C0802	9	NADPILISL		C1202	9	YTIENPRHF		C1203	9	QLPNFAFSV						C1403	9
								C0303	9	SANIRLTAM		C0304	9	MVNPVIYAL														C0801	9	VAITEHTEV		C0802	9	NADPLEVML		C1202	9	YTKAWEEYY		C1203	9	QMFQGIILF						C1403	9
								C0303	9	SAQGKPLAL		C0304	9	MVVDIVQEL														C0801	9	VALAWLHVL		C0802	9	NADPQAVTM		C1202	9	YTNGKCVIL		C1203	9	QMSNITVTY						C1403	9
								C0303	9	SASPASLLL		C0304	9	MVVGTGTSL														C0801	9	VALDFEQEM		C0802	9	NADQLASKL		C1202	9	YTRPAISSF		C1203	9	QSFNAVVNY						C1403	9
								C0303	9	SASPPGPTL		C0304	9	NAATSFQVL														C0801	9	VALHSAVSA		C0802	9	NADQQNFTV		C1202	9	YTRPGLPTF		C1203	9	QSFPEPLII						C1403	9
								C0303	9	SATELMNIL		C0304	9	NADPIAKYL														C0801	9	VALNSFDDL		C0802	9	NADSATRLL		C1202	9	YTVGGLETF		C1203	9	QSFPGILKA						C1403	9
								C0303	9	SATQVYTIL		C0304	9	NADPNMKLF														C0801	9	VALPMVLVL		C0802	9	NADSKALDL		C1202	9	YVHETLTVY		C1203	9	QSSELTKWY						C1403	9
								C0303	9	SAVDFIRTL		C0304	9	NAFMKAVEL														C0801	9	VALPPGLAV		C0802	9	NADSQFWSL		C1202	9	YVIQHVLEH		C1203	9	QSSGLVRHW						C1403	9
								C0303	9	SAVDLPVTL		C0304	9	NAFSGVMML														C0801	9	VAMTGEITL		C0802	9	NADSSNTAL		C1202	9	YVKGGLSTF		C1203	9	QSTDIIRYL						C1403	9
								C0303	9	SAVDVHINM		C0304	9	NAIGPLVAL														C0801	9	VANFQKTTL		C0802	9	NADTLALVF		C1202	9	YVTTSTRTY		C1203	9	QSVSMVILY						C1403	9
								C0303	9	SAVEPKTAL		C0304	9	NAILVDTPL														C0801	9	VANTMRTSL		C0802	9	NADTVSSKL						C1203	9	QSYGNVVEL						C1403	9
								C0303	9	SAVGHVFSL		C0304	9	NAINITSAL														C0801	9	VANVSLLAL		C0802	9	NADVALQNL						C1203	9	QSYPTPVTV						C1403	9
								C0303	9	SAVGQFVSL		C0304	9	NAIREVLEL														C0801	9	VAPEEHPVL		C0802	9	NADVALVNF						C1203	9	QTFIRAIFY						C1403	9
								C0303	9	SAVHWVATL		C0304	9	NAISIHHAL														C0801	9	VAPPGCSHL		C0802	9	NADVPEQLI						C1203	9	QTIDNIVFY						C1403	9
								C0303	9	SAVPCALLL		C0304	9	NAITAFSTL														C0801	9	VAPPVSGDL		C0802	9	NADVQERLL						C1203	9	QTYFFPIHL						C1403	9
								C0303	9	SAVQASLSL		C0304	9	NALFHASTL														C0801	9	VAQELPTTL		C0802	9	NADVQSIAV						C1203	9	QTYGYEHIL						C1403	9
								C0303	9	SAVSHFFSL		C0304	9	NAMGFHVIL														C0801	9	VAQSNFEAL		C0802	9	NADYVAAFL						C1203	9	QTYPEVVRM						C1403	9
								C0303	9	SAVSIFHEL		C0304	9	NASPVISSV														C0801	9	VASAVCLRL		C0802	9	NAEPEPRSL						C1203	9	RAADVLVYL						C1403	9
								C0303	9	SAVSSFVFL		C0304	9	NAVGLFSRL														C0801	9	VASEIMAVL		C0802	9	NAEQHVTQL						C1203	9	RAAEFIKNY						C1403	9
								C0303	9	SAVWNSPPL		C0304	9	NAVPLFLRL														C0801	9	VASELHTSL		C0802	9	NAETFGIPL						C1203	9	RAALPLQLL						C1403	9
								C0303	9	SAYAGFLAL		C0304	9	NAVWALSNL														C0801	9	VASEVNLTA		C0802	9	NALDLNSVL						C1203	9	RAAPFSLEY						C1403	9
								C0303	9	SAYPLSVEW		C0304	9	NAYTGIVLL														C0801	9	VASEVSTSL		C0802	9	NFDGHVVLP						C1203	9	RAASFVSVL						C1403	9
								C0303	9	SAYQRYYSL		C0304	9	NGIFPGTPL														C0801	9	VASEVYKAV		C0802	9	NGDISSLEL						C1203	9	RAATFPLQV						C1403	9
								C0303	9	SGIERMGPL		C0304	9	NIDEAYKIL														C0801	9	VASEYPVIL		C0802	9	NGDTPNLSF						C1203	9	RAFCGILYM						C1403	9
								C0303	9	SIALPSKPA		C0304	9	NILDRFLAL														C0801	9	VASKVFYHL		C0802	9	NIDAHNTSV						C1203	9	RAFDHVLHL						C1403	9
								C0303	9	SIIAMGNTL		C0304	9	NIYAANPVI														C0801	9	VASPPTHAA		C0802	9	NIDEGPLAF						C1203	9	RAFEYEIRF						C1403	9
								C0303	9	SIIGSARSL		C0304	9	NSNPVIAEL														C0801	9	VASQITEAL		C0802	9	NIDEIYKAL						C1203	9	RAFGIPIRV						C1403	9
								C0303	9	SIIPPLFTV		C0304	9	NTIDPSHPM														C0801	9	VASSLYDIL		C0802	9	NIDFMPTIL						C1203	9	RAFHGWNEF						C1403	9
								C0303	9	SILSHFQSL		C0304	9	NTIETFNEL														C0801	9	VATAADLEL		C0802	9	NIDINNNEL						C1203	9	RAFKKPVFY						C1403	9
								C0303	9	SILTTHTTL		C0304	9	NTMGHMMEM														C0801	9	VATDFFTVL		C0802	9	NIDIQNGFL						C1203	9	RAFNRIYVA						C1403	9
								C0303	9	SIQVPGMQM		C0304	9	NVIESFTEL														C0801	9	VATEGAEVL		C0802	9	NIDLAVQCL						C1203	9	RAFPGLRYV						C1403	9
								C0303	9	SIVAPGGAL		C0304	9	NVLDHFSEL														C0801	9	VATGVISTL		C0802	9	NIDLVVKEL						C1203	9	RAFPLPMSF						C1403	9
								C0303	9	SIVKPYLTL		C0304	9	QAADSILVL														C0801	9	VATKIFQEL		C0802	9	NIDVVGVSF						C1203	9	RAFPYGNVA						C1403	9
								C0303	9	SIYSRFVQL		C0304	9	QAFPGLLQL														C0801	9	VATWVDETL		C0802	9	NIDYTVHSV						C1203	9	RAIAKIKML						C1403	9
								C0303	9	SLIEQTTAL		C0304	9	QAFPRITQL														C0801	9	VAVDGINAL		C0802	9	NIESPTSIL						C1203	9	RAIDFSPYL						C1403	9
								C0303	9	SLVPPGASL		C0304	9	QAHLTLMAL														C0801	9	VAVEPGAAV		C0802	9	NLDATVTAL						C1203	9	RAIDKCWKI						C1403	9
								C0303	9	SNVYPSKPL		C0304	9	QAIENAHVL														C0801	9	VAVGAEHTL		C0802	9	NLDENGLDL						C1203	9	RAIDSIHQL						C1403	9
								C0303	9	SQYPFPVTL		C0304	9	QAIERYLVV														C0801	9	VAVGEFQEV		C0802	9	NLDETSEIL						C1203	9	RAIELATTL						C1403	9
								C0303	9	SSAPPLSEL		C0304	9	QAIGAIRTL														C0801	9	VAVGVIKAV		C0802	9	NLDLAVLEL						C1203	9	RAIELFHSY						C1403	9
								C0303	9	SSAVPGTAL		C0304	9	QAIPVTSEL														C0801	9	VAVISGEAL		C0802	9	NLDLQHNEL						C1203	9	RAIENIDTL						C1403	9
								C0303	9	SSCPLLRTL		C0304	9	QALDYFLKM														C0801	9	VAVPLYDTL		C0802	9	NLDNSSSHL						C1203	9	RAILRIIYF						C1403	9
								C0303	9	SSIDPGLSI		C0304	9	QALPWISIL														C0801	9	VAVQHFSLL		C0802	9	NMDCPNHGF						C1203	9	RAIQFYLEF						C1403	9
								C0303	9	SSIEHLTTL		C0304	9	QAMGSFLSV														C0801	9	VAVQPGEQL		C0802	9	NMDSPGPML						C1203	9	RALNFAYTV						C1403	9
								C0303	9	SSMLPVMAL		C0304	9	QAMPPLFSL														C0801	9	VAWADARSL		C0802	9	NQDLALSNL						C1203	9	RASFIFISV						C1403	9
								C0303	9	SSMYPPHPL		C0304	9	QAMPTLIEL														C0801	9	VAYDSDYAL		C0802	9	NQDLTFQHI						C1203	9	RASGIFLRL						C1403	9
								C0303	9	SSSPAVLAL		C0304	9	QANIRLTSL														C0801	9	VAYGLHELL		C0802	9	NSDADPLCL						C1203	9	RASLLLKTY						C1403	9
								C0303	9	SSTTVIPTL		C0304	9	QATDSILVF														C0801	9	VAYIDGQVL		C0802	9	NSDDIGVFL						C1203	9	RASNITMIL						C1403	9
								C0303	9	STFSPSLAL		C0304	9	QATMPHLSM														C0801	9	VAYLQAHAL		C0802	9	NSDGLIASL						C1203	9	RASPIKMDL						C1403	9
								C0303	9	STLNRFSAL		C0304	9	QATPAALVL														C0801	9	VAYVSSVAL		C0802	9	NSDGRQQIL						C1203	9	RASWIAQVF						C1403	9
								C0303	9	STYHRFLTW		C0304	9	QAVKIGQSL														C0801	9	VGAPVGIAL		C0802	9	NSDGYPDSL						C1203	9	RATALDNVV						C1403	9
								C0303	9	SVAKESIPL		C0304	9	QIIAFFAHL														C0801	9	VGDPHTVTV		C0802	9	NSDINEWSL						C1203	9	RAVELVKSW						C1403	9
								C0303	9	SVIIPGMTL		C0304	9	QLLDIKIRL														C0801	9	VGDPSVHLL		C0802	9	NSDLVLQTL						C1203	9	RAWFPPAIM						C1403	9
								C0303	9	SVIPPRTEL		C0304	9	QSISPGSRL														C0801	9	VGHVMGSAL		C0802	9	NSDPETPVL						C1203	9	RAWGHPCEM						C1403	9
								C0303	9	SVIQHTNSL		C0304	9	QSLPPGLAV														C0801	9	VIAPPDFVL		C0802	9	NSDPYSVAL						C1203	9	RAYAKALHY						C1403	9
								C0303	9	SVISVVSYL		C0304	9	QSYGNVVEL														C0801	9	VIDGEFKEL		C0802	9	NSDSPQQVL						C1203	9	RAYAKDVKF						C1403	9
								C0303	9	SVLDRPRAL		C0304	9	QVEDAFRYM														C0801	9	VIDGHIYAV		C0802	9	NSDTHSSTF						C1203	9	RAYALCVLY						C1403	9
								C0303	9	SVNGFISTL		C0304	9	RAFQPSVSL														C0801	9	VIDGKMYEL		C0802	9	NSDTSVETL						C1203	9	RAYDGTTYL						C1403	9
								C0303	9	SVVAVPLPL		C0304	9	RAHSEPLAL														C0801	9	VIHDFLFSL		C0802	9	NSDTTSPEL						C1203	9	RAYELTQYY						C1403	9
								C0303	9	SVVDVFAQL		C0304	9	RAIDFSPYL														C0801	9	VIIDDHPEV		C0802	9	NTDEPPMVF						C1203	9	RAYIFAMKV						C1403	9
								C0303	9	SVVFHSTVI		C0304	9	RAIEIYTDM														C0801	9	VIIGSTHVL		C0802	9	NTDGKTLPS						C1203	9	RAYPAAITI						C1403	9
								C0303	9	TAAADFTAK		C0304	9	RAIELATTL														C0801	9	VIISDAHVL		C0802	9	NTDISILSL						C1203	9	RAYPAQITP						C1403	9
								C0303	9	TAAAVGAVF		C0304	9	RAIGIGAYL														C0801	9	VILEPMQEL		C0802	9	NTDSSPRCL						C1203	9	RAYPHVFTK						C1403	9
								C0303	9	TAAFPFAAL		C0304	9	RAIPNNQVL														C0801	9	VIMDNFEYL		C0802	9	NTDSVHLAL						C1203	9	RAYPSMMGL						C1403	9
								C0303	9	TAAPPAQPL		C0304	9	RAIQFYLEF														C0801	9	VIMEPHKEV		C0802	9	NVDAGKSTL						C1203	9	RAYPTVKFY						C1403	9
								C0303	9	TAAPTIGVL		C0304	9	RALDHYLTL														C0801	9	VIQEAFIEL		C0802	9	NVDDCGFSL						C1203	9	RAYQRQLVM						C1403	9
								C0303	9	TAAPVPTTL		C0304	9	RALEHFTDL														C0801	9	VIQENEHAL		C0802	9	NVDDPTGNF						C1203	9	RAYSFKVVL						C1403	9
								C0303	9	TAAPVVPEL		C0304	9	RATPHFSGL														C0801	9	VISLEGKPL		C0802	9	NVDENVAEL						C1203	9	RFFEAIVWY						C1403	9
								C0303	9	TAASPTIAL		C0304	9	RAVAPTMSL														C0801	9	VIVEPLEQL		C0802	9	NVDGHLYEL						C1203	9	RGFDKAYVV						C1403	9
								C0303	9	TACAINKVL		C0304	9	RAVPVGSGL														C0801	9	VIVPLYDTL		C0802	9	NVDIPDVPL						C1203	9	RGYDFCQVL						C1403	9
								C0303	9	TADGMVHLL		C0304	9	RAYAKFYTL														C0801	9	VLDAHFLVL		C0802	9	NVDPDNVVL						C1203	9	RIIDCAFTV						C1403	9
								C0303	9	TAFHSSMAL		C0304	9	RCIPALDSL														C0801	9	VLYPGCDTL		C0802	9	NVDPDSVVL						C1203	9	RIYPFLLMV						C1403	9
								C0303	9	TAFPQRTEL		C0304	9	RIFEKMFAM														C0801	9	VNHFQKDSI		C0802	9	NVDQAFHEL						C1203	9	RLFGAVVRW						C1403	9
								C0303	9	TAIAESPVI		C0304	9	RIIPRHLQL														C0801	9	VPAALTPRA		C0802	9	NVDQAVATL						C1203	9	RLGPPEPMM						C1403	9
								C0303	9	TAIDRYLCL		C0304	9	RIPSFVTEL														C0801	9	VPAKKITAA		C0802	9	NVDSGKSTL						C1203	9	RLPEFIVQT						C1403	9
								C0303	9	TAIDWFHEW		C0304	9	RIVPRFSEL														C0801	9	VPHQPFSQA		C0802	9	NVDSNNKEL						C1203	9	RLPVFNWTA						C1403	9
								C0303	9	TAIESTPTL		C0304	9	RLLDWFRSL														C0801	9	VPRPPSNPP		C0802	9	NVDTPVSTL						C1203	9	RMYPGLQVY						C1403	9
								C0303	9	TAINHFFIW		C0304	9	RSIFPQQSL														C0801	9	VPSAVLIVA		C0802	9	NVEEAFFTL						C1203	9	RQADCILIV						C1403	9
								C0303	9	TAIPCLLAL		C0304	9	RTFEAFMYL														C0801	9	VPSYPSKSA		C0802	9	NVENAFFTL						C1203	9	RQADFVQVL						C1403	9
								C0303	9	TAIPISMVL		C0304	9	RTIGFFYTL														C0801	9	VPTKRPPVL		C0802	9	PADEPRTVL						C1203	9	RQFDHPHIV						C1403	9
								C0303	9	TAIPVTQEL		C0304	9	RTMEIFQLL														C0801	9	VPYGTPLSV		C0802	9	QADAPNPGL						C1203	9	RQFPVTVHF						C1403	9
								C0303	9	TAIRSGLEL		C0304	9	RTNRPPLSL														C0801	9	VPYGVGKAA		C0802	9	QADAPNPSL						C1203	9	RQIDFVLSY						C1403	9
								C0303	9	TAISLFYEL		C0304	9	RTVDLFPVL														C0801	9	VPYPPLLRA		C0802	9	QADARQVVL						C1203	9	RQIGVEHVV						C1403	9
								C0303	9	TAISRYMEL		C0304	9	RVIDVGSEW														C0801	9	VSAGIQTSF		C0802	9	QADCAVLIV						C1203	9	RQINWTVLY						C1403	9
								C0303	9	TAISTSPLL		C0304	9	RVIDYILDL														C0801	9	VSAPVTHQL		C0802	9	QADEVIAIL						C1203	9	RQYPEVIKY						C1403	9
								C0303	9	TALNLFFKL		C0304	9	SAACPGLQL														C0801	9	VSCGEAHTL		C0802	9	QADFAIEAL						C1203	9	RSAEVTLEV						C1403	9
								C0303	9	TALPRIFSL		C0304	9	SAAEAYQVL														C0801	9	VSDDTVMHL		C0802	9	QADFEAHNI						C1203	9	RSFEAEINY						C1403	9
								C0303	9	TASPFFRAL		C0304	9	SAAEIMAVL														C0801	9	VSDGVPLVL		C0802	9	QADFKPATL						C1203	9	RSFPSVREL						C1403	9
								C0303	9	TASPVAVSL		C0304	9	SAAENFLVL														C0801	9	VSDQANHVL		C0802	9	QADIALIGL						C1203	9	RSIDLTVKL						C1403	9
								C0303	9	TASPVIKAV		C0304	9	SAAFPGASL														C0801	9	VSDSGAHVL		C0802	9	QADICVREI						C1203	9	RSLEFSVSY						C1403	9
								C0303	9	TAVAPNVAL		C0304	9	SAAGPGFSL														C0801	9	VSFPGQEAL		C0802	9	QADIEVRAL						C1203	9	RSLHFFVEW						C1403	9
								C0303	9	TAVENMPSL		C0304	9	SAAMPGASL														C0801	9	VSHALQAAL		C0802	9	QADLAVLVI						C1203	9	RSSENILTV						C1403	9
								C0303	9	TAVMPKVSL		C0304	9	SAAMVFSAL														C0801	9	VSHLLQDNL		C0802	9	QADLSNLHL						C1203	9	RSTDSIRLL						C1403	9
								C0303	9	TAVPYFSNL		C0304	9	SAANIQPIF														C0801	9	VSHVIVDEV		C0802	9	QADNPHVAL						C1203	9	RSVDIINML						C1403	9
								C0303	9	TAVVPPMCL		C0304	9	SAAPEGVPL														C0801	9	VSIGDSHCL		C0802	9	QADPSAPCL						C1203	9	RSYPYAFSV						C1403	9
								C0303	9	TAYDNFVEL		C0304	9	SAAPLFFSW														C0801	9	VSQAQKDEL		C0802	9	QADPTKLEL						C1203	9	RTADVIIMM						C1403	9
								C0303	9	TGIPGLEQL		C0304	9	SAAPLGTTL														C0801	9	VSQELKEPL		C0802	9	QADQEAKEL						C1203	9	RTAGIFSLI						C1403	9
								C0303	9	TGIQPGTSL		C0304	9	SAAPLQPVL														C0801	9	VSSNDFSSL		C0802	9	QADQTFISL						C1203	9	RTFPWIIEV						C1403	9
								C0303	9	TIDPIPHQL		C0304	9	SAAPRTVAL														C0801	9	VSYYEKHSL		C0802	9	QADSGRVLL						C1203	9	RTIAKRLVL						C1403	9
								C0303	9	TIDPNTRTL		C0304	9	SAAPTFLLL														C0801	9	VTDGALVVV		C0802	9	QADSLERSL						C1203	9	RTIDFVHQV						C1403	9
								C0303	9	TIIEATHVL		C0304	9	SAAQPGVAF														C0801	9	VTDHNLHEL		C0802	9	QADTPALSL						C1203	9	RTKDTPLSL						C1403	9
								C0303	9	TIIRQNQAL		C0304	9	SAASITPLL														C0801	9	VTEAVFHSL		C0802	9	QADTTRLEL						C1203	9	RTTDIVIRI						C1403	9
								C0303	9	TIMPRGPTL		C0304	9	SAASLYPVL														C0801	9	VTHLLQQEL		C0802	9	QADVAVLVV						C1203	9	RTVDLFPVL						C1403	9
								C0303	9	TITDIISAL		C0304	9	SADFPRVGM														C0801	9	VTLEPHIEL		C0802	9	QADYGLEHL						C1203	9	RTYDLYITY						C1403	9
								C0303	9	TIVDTGIGM		C0304	9	SADPGILVL														C0801	9	VTVPPGPSL		C0802	9	QAEDGKTEL						C1203	9	RTYDMIQYY						C1403	9
								C0303	9	TIYDRFVHL		C0304	9	SADSLEHVL														C0801	9	VTVRPGLAM		C0802	9	QAERPDTML						C1203	9	RTYPSIQIM						C1403	9
								C0303	9	TIYHMFIAL		C0304	9	SAFDHFASV														C0801	9	VTVSPDGSL		C0802	9	QGDGPSRNL						C1203	9	RTYPVEILY						C1403	9
								C0303	9	TMLSRENVG		C0304	9	SAFGYFITA														C0801	9	VTYPGELLL		C0802	9	QIDELVTRI						C1203	9	RVFPHEVNW						C1403	9
								C0303	9	TSSPSILTL		C0304	9	SAFLKTIAL														C0801	9	VVADLFHSL		C0802	9	QIDFPTSAF						C1203	9	RVFPSPMRI						C1403	9
								C0303	9	TSVPPGSAL		C0304	9	SAFPEVRSL														C0801	9	VVANVQLVL		C0802	9	QIDIGGVTL						C1203	9	RVFPYISVM						C1403	9
								C0303	9	TTIKPGLAL		C0304	9	SAFPFPVTV														C0801	9	VVAPAGITL		C0802	9	QIDQINTDL						C1203	9	RVFPYSVFY						C1403	9
								C0303	9	TTMVPTAAL		C0304	9	SAFPHLRVL														C0801	9	VVCGLIFRL		C0802	9	QLDAENLEL						C1203	9	RVIELAVKY						C1403	9
								C0303	9	TVIPHLMAL		C0304	9	SAHSHFISL														C0801	9	VVCPVSDIL		C0802	9	QLDIIIHSL						C1203	9	RVKKTWTVV						C1403	9
								C0303	9	TVTTVILEV		C0304	9	SAIASTKVM														C0801	9	VVDGGAIPA		C0802	9	QLDLENTEL						C1203	9	RVPNSVLWL						C1403	9
								C0303	9	VAAAHSVVL		C0304	9	SAIDRIFTL														C0801	9	VVDGTPLVA		C0802	9	QLDVSSNEL						C1203	9	RVSELHLEV						C1403	9
								C0303	9	VAADAVASL		C0304	9	SAIEIYLKL														C0801	9	VVDHVFPLL		C0802	9	QNDLGQTAL						C1203	9	RVYERLLYV						C1403	9
								C0303	9	VAAGVLCEL		C0304	9	SAIFNFQSL														C0801	9	VVFDDSEPV		C0802	9	QQDYFPKAL						C1203	9	RVYPQAVYF						C1403	9
								C0303	9	VAAKKNVSI		C0304	9	SAIFPDVAL														C0801	9	VVIEPISEL		C0802	9	QSDDPPIIL						C1203	9	RWYNHIKSY						C1403	9
								C0303	9	VAALSGRPL		C0304	9	SAIGPFSGL														C0801	9	VVQGDPREL		C0802	9	QSDIPSSLL						C1203	9	SAAAAPHLL						C1403	9
								C0303	9	VAAPASLSL		C0304	9	SAIGYIHSL														C0801	9	VVVAVGRAL		C0802	9	QSDLGYNSL						C1203	9	SAAAIFKIY						C1403	9
								C0303	9	VACGLNHTL		C0304	9	SAIHVLASL														C0801	9	VVVDPIQSV		C0802	9	QSDPSGAYF						C1203	9	SAADIPINI						C1403	9
								C0303	9	VADPVYRTF		C0304	9	SAIIFETPL														C0801	9	VVVQPYNSL		C0802	9	QSDPVGPAL						C1203	9	SAADLVHFL						C1403	9
								C0303	9	VADPYVVIM		C0304	9	SAILRSPAF														C0801	9	WALDDHHAL		C0802	9	QSDVYTHVL						C1203	9	SAADVVVVH						C1403	9
								C0303	9	VAEAGLTIS		C0304	9	SAINQVEAL														C0801	9	YAAGAKLVL		C0802	9	QTDIPFTRL						C1203	9	SAAEHFSII						C1403	9
								C0303	9	VAEENTRVL		C0304	9	SAIPHPLIM														C0801	9	YAAGVHSVL		C0802	9	QTDPPRSSL						C1203	9	SAAEHFSMI						C1403	9
								C0303	9	VAFDKFWNM		C0304	9	SAIPWGISA														C0801	9	YAAQASQAL		C0802	9	QTDQPETVI						C1203	9	SAAEIMAVL						C1403	9
								C0303	9	VAFGPAFAL		C0304	9	SAITTLMHL														C0801	9	YAAYPLTEV		C0802	9	QVDNPVSVL						C1203	9	SAAENFLVL						C1403	9
								C0303	9	VAFQHFQEL		C0304	9	SALAKLSVL														C0801	9	YACGFSVLL		C0802	9	QWDLVENYL						C1203	9	SAAFAVKLF						C1403	9
								C0303	9	VAFSPVTEL		C0304	9	SALAWQQSL														C0801	9	YADGYSPPL		C0802	9	RADADTVLL						C1203	9	SAAFIFSYI						C1403	9
								C0303	9	VAGPALEAL		C0304	9	SALDTGFSL														C0801	9	YADPNFVRT		C0802	9	RADAGPLCA						C1203	9	SAAFPGASL						C1403	9
								C0303	9	VAGPVGGSL		C0304	9	SALEKFVEL														C0801	9	YADPSILYI		C0802	9	RADAPVALV						C1203	9	SAAGFPIRV						C1403	9
								C0303	9	VAICRNLIL		C0304	9	SALEKSLAV														C0801	9	YADQHSVQV		C0802	9	RADDTFEAL						C1203	9	SAAGLKLYL						C1403	9
								C0303	9	VAIFPSPMM		C0304	9	SALERLTTL														C0801	9	YADTCFSTI		C0802	9	RADEDARMI						C1203	9	SAAHAIVSV						C1403	9
								C0303	9	VAIGPCRML		C0304	9	SALGHLSFL														C0801	9	YAEQLHVQL		C0802	9	RADEKITNI						C1203	9	SAAHFVMFF						C1403	9
								C0303	9	VAIIARTDL		C0304	9	SALGKSPWL														C0801	9	YAETIAHIL		C0802	9	RADESTYVL						C1203	9	SAAMVFSAL						C1403	9
								C0303	9	VAIKAGTTL		C0304	9	SALHYAVEL														C0801	9	YAETLFDIL		C0802	9	RADGENTAF						C1203	9	SAANIQPIF						C1403	9
								C0303	9	VAILRHPTL		C0304	9	SALNRMKEL														C0801	9	YAFGGGCEL		C0802	9	RADHVFICF						C1203	9	SAAPFAQRY						C1403	9
								C0303	9	VAIPCYTTL		C0304	9	SALNVRLFL														C0801	9	YAFKDNSNL		C0802	9	RADIGAASL						C1203	9	SAAPFFVLF						C1403	9
								C0303	9	VAIQAVLSL		C0304	9	SALPFITYL														C0801	9	YAFLLDKAL		C0802	9	RADILQVGL						C1203	9	SAAPLPLYT						C1403	9
								C0303	9	VAIQAVLTL		C0304	9	SAMAVVSRL														C0801	9	YAFPKAVSV		C0802	9	RADKPWTRL						C1203	9	SAAPLQPVL						C1403	9
								C0303	9	VALAWLHVL		C0304	9	SAMEVVPAL														C0801	9	YAFPKSITV		C0802	9	RADLIEVVM						C1203	9	SAAPVAHLL						C1403	9
								C0303	9	VALCHLAEL		C0304	9	SAMKAVTEL														C0801	9	YAFPLAHSL		C0802	9	RADLQATAL						C1203	9	SAASICAKV						C1403	9
								C0303	9	VALDFEQEM		C0304	9	SAMMYIQEL														C0801	9	YAFQDDRYL		C0802	9	RADLTYAEF						C1203	9	SAASLYPVL						C1403	9
								C0303	9	VALGNMYEL		C0304	9	SAQGKPLAL														C0801	9	YAFQDENHL		C0802	9	RADMLEMEL						C1203	9	SAAYLPRMW						C1403	9
								C0303	9	VALLRVTPF		C0304	9	SAQPWIAAL														C0801	9	YAFSGVEEL		C0802	9	RADPESPIL						C1203	9	SAFATPFLV						C1403	9
								C0303	9	VALLVTSGL		C0304	9	SASALAVAL														C0801	9	YAIESQLQL		C0802	9	RADREVAIY						C1203	9	SAFAYAIAA						C1403	9
								C0303	9	VALPASGWL		C0304	9	SASPASLLL														C0801	9	YAIEVDPVL		C0802	9	RADSSRASL						C1203	9	SAFDHFASV						C1403	9
								C0303	9	VALPMVLVL		C0304	9	SASSFFKEL														C0801	9	YAIGRSDTV		C0802	9	RADSVGKLV						C1203	9	SAFDRCATL						C1403	9
								C0303	9	VALPPGLAV		C0304	9	SASTVFIAL														C0801	9	YAIGVSHPL		C0802	9	RADTFPQVL						C1203	9	SAFDRKVQF						C1403	9
								C0303	9	VALPVFLVI		C0304	9	SATELMNIL														C0801	9	YAIHGVLEV		C0802	9	RADTGHAFL						C1203	9	SAFDRVMRL						C1403	9
								C0303	9	VALPVVYSL		C0304	9	SATIVIAYL														C0801	9	YAINQPDVL		C0802	9	RADTGQERF						C1203	9	SAFEKPQII						C1403	9
								C0303	9	VALVVGHEL		C0304	9	SATQVFPRL														C0801	9	YAIQATETL		C0802	9	RADTQAQAL						C1203	9	SAFGLPIVF						C1403	9
								C0303	9	VAMERVSVL		C0304	9	SATQVYTIL														C0801	9	YAIREEIVL		C0802	9	RADVKGGTL						C1203	9	SAFGNVKLV						C1403	9
								C0303	9	VAMYGGLVL		C0304	9	SATRVYIVL														C0801	9	YAISKPDIL		C0802	9	RADVSLTTL						C1203	9	SAFGQIYKV						C1403	9
								C0303	9	VANNRIITL		C0304	9	SAVDFIRTL														C0801	9	YAISKPEVL		C0802	9	RADYDNLVL						C1203	9	SAFGYFITA						C1403	9
								C0303	9	VANPEHMEM		C0304	9	SAVDLPVTL														C0801	9	YAISPGLDI		C0802	9	RAEDNADTL						C1203	9	SAFINLVEF						C1403	9
								C0303	9	VANPNSAIF		C0304	9	SAVDPVAVL														C0801	9	YAITTLHNL		C0802	9	RAEEAAGQL						C1203	9	SAFLPARFY						C1403	9
								C0303	9	VANVPNTSL		C0304	9	SAVDVHINM														C0801	9	YALDLIDKL		C0802	9	RAEEGFTQV						C1203	9	SAFPEVRSL						C1403	9
								C0303	9	VANVSLLAL		C0304	9	SAVGHVFSL														C0801	9	YALDLSTFL		C0802	9	RAEELGQEL						C1203	9	SAFPFLQEY						C1403	9
								C0303	9	VAQELPTTL		C0304	9	SAVGKTSLL														C0801	9	YALGKDFCL		C0802	9	RAELASAAL						C1203	9	SAFPFPVTV						C1403	9
								C0303	9	VAQNSGLTL		C0304	9	SAVGQFVSL														C0801	9	YALNHTLSV		C0802	9	RAELHPVEL						C1203	9	SAFPHLRVL						C1403	9
								C0303	9	VAQTWFRFL		C0304	9	SAVSHFFSL														C0801	9	YALPAGLSA		C0802	9	RATNEGLSL						C1203	9	SAFPSNIFY						C1403	9
								C0303	9	VASAVCLRL		C0304	9	SAVSIFHEL														C0801	9	YALYVRDTL		C0802	9	RFDVHDVTL						C1203	9	SAFPYAHRF						C1403	9
								C0303	9	VASFPRTVL		C0304	9	SAVSSFVFL														C0801	9	YAMDELRSL		C0802	9	RGDDTPLHL						C1203	9	SAFSRIMKL						C1403	9
								C0303	9	VATAADLEL		C0304	9	SAVTTFEAL														C0801	9	YANEVGEAF		C0802	9	RGDSVIVVL						C1203	9	SAFTNRIFF						C1403	9
								C0303	9	VATDFFTVL		C0304	9	SAVVQHMSL														C0801	9	YAQTQLDKL		C0802	9	RGDTLLQAL						C1203	9	SAFYFVMKF						C1403	9
								C0303	9	VATGVISTL		C0304	9	SAVWNSPPL														C0801	9	YASDYFDQL		C0802	9	RGDWPGVVL						C1203	9	SAGPLLRPY						C1403	9
								C0303	9	VATKIFQEL		C0304	9	SAVYVLSSM														C0801	9	YASNITSVL		C0802	9	RIDDLQMVL						C1203	9	SAHSKVVIF						C1403	9
								C0303	9	VATQVGIEW		C0304	9	SAYAGFLAL														C0801	9	YASPDLSKL		C0802	9	RIDEARQEL						C1203	9	SAIASTKVM						C1403	9
								C0303	9	VAVDGINAL		C0304	9	SAYGKFRKL														C0801	9	YASSPGMSL		C0802	9	RIDEINKEL						C1203	9	SAIDRIFTL						C1403	9
								C0303	9	VAVEPGAAV		C0304	9	SAYPLSVEW														C0801	9	YATDLVVCV		C0802	9	RIDQVNQLL						C1203	9	SAIFCVVIF						C1403	9
								C0303	9	VAVFPWHSL		C0304	9	SAYQNHLIL														C0801	9	YATIILSKM		C0802	9	RLDDAIHVL						C1203	9	SAIGFALEL						C1403	9
								C0303	9	VAVGSGLSW		C0304	9	SCYGYPIQL														C0801	9	YATTGKCEL		C0802	9	RLDEVSREL						C1203	9	SAIGLVLLM						C1403	9
								C0303	9	VAVGVIKAV		C0304	9	SDLWPFEAI														C0801	9	YAVELFEGL		C0802	9	RLDIAGRDI						C1203	9	SAIGYIHSL						C1403	9
								C0303	9	VAVHVFSEF		C0304	9	SFLTQSYQL														C0801	9	YAVRDTIAL		C0802	9	RLDQPMTEI						C1203	9	SAINWTLIH						C1403	9
								C0303	9	VAVISGEAL		C0304	9	SFVDLRLLL														C0801	9	YAYDGKDYI		C0802	9	RLDTGPQSL						C1203	9	SAIPHPLIM						C1403	9
								C0303	9	VAVPTLNAL		C0304	9	SGIERMGPL														C0801	9	YAYEKPHVV		C0802	9	RLDWPVRTL						C1203	9	SAIQKIITI						C1403	9
								C0303	9	VAVPVAVTF		C0304	9	SGIGFGESL														C0801	9	YAYETKDAL		C0802	9	RNDASEVVL						C1203	9	SAISSVRLY						C1403	9
								C0303	9	VAVQHFSLL		C0304	9	SGIGVSQVL														C0801	9	YAYNDKAIL		C0802	9	RQDAVHAIL						C1203	9	SAITKPWEV						C1403	9
								C0303	9	VAVQPGEQL		C0304	9	SIAGIFKEV														C0801	9	YAYRDAVFL		C0802	9	RQDEIKNKL						C1203	9	SAKDFIRNL						C1403	9
								C0303	9	VAVSPSLDL		C0304	9	SIFSGAASL														C0801	9	YAYTGRLEL		C0802	9	RQDFSPEEL						C1203	9	SAKPYAHIL						C1403	9
								C0303	9	VAVSVLNAL		C0304	9	SIIAMGNTL														C0801	9	YGAEALERM		C0802	9	RQDLTTLDV						C1203	9	SAKTPGFSV						C1403	9
								C0303	9	VAVVAGVAL		C0304	9	SIIGRLLEV														C0801	9	YGDEIAIEL		C0802	9	RQDNKCLEL						C1203	9	SALDMTRYW						C1403	9
								C0303	9	VAYLQAHAL		C0304	9	SIIGSARSL														C0801	9	YGDHTKLIL		C0802	9	RQDVATNLL						C1203	9	SALEHSIQY						C1403	9
								C0303	9	VAYMNPIAM		C0304	9	SIILPQTEL														C0801	9	YGDPHSPVI		C0802	9	RQDVDNASL						C1203	9	SALEHVVEF						C1403	9
								C0303	9	VAYPGIPKL		C0304	9	SILSHFQSL														C0801	9	YGLEPAHPL		C0802	9	RSDASSPTI						C1203	9	SALEVVRKY						C1403	9
								C0303	9	VAYVSSVAL		C0304	9	SISGITMVL														C0801	9	YGVTVFKAL		C0802	9	RSDELTRHF						C1203	9	SALHIIVQY						C1403	9
								C0303	9	VAYWRQAGL		C0304	9	SIVAPGGAL														C0801	9	YGYEHILTL		C0802	9	RSDGEAELL						C1203	9	SALPFITYL						C1403	9
								C0303	9	VEPEVAIHR		C0304	9	SIVEQQLPL														C0801	9	YIDDVFHAL		C0802	9	RSDKPIFTL						C1203	9	SALPTVVAY						C1403	9
								C0303	9	VFNTLQGGK		C0304	9	SIVKPYLTL														C0801	9	YIDEGRLVL		C0802	9	RSDLKAEAL						C1203	9	SAMPTVRSF						C1403	9
								C0303	9	VGAPVGIAL		C0304	9	SIYSRFVQL														C0801	9	YIFDNCHEL		C0802	9	RSDLYAVEM						C1203	9	SAMVRVISV						C1403	9
								C0303	9	VGDPSVHLL		C0304	9	SLINPSSSL														C0801	9	YIIKDKHIL		C0802	9	RSDQASISL						C1203	9	SANHNILQI						C1403	9
								C0303	9	VGGVALSLS		C0304	9	SNVYPSKPL														C0801	9	YILDLQVVL		C0802	9	RSDSYISQL						C1203	9	SAQPLPLKI						C1403	9
								C0303	9	VGVPVGSAL		C0304	9	SQYPFPVTL														C0801	9	YILGKFFAL		C0802	9	RSDTAQVEL						C1203	9	SASDIFNVA						C1403	9
								C0303	9	VIAPNPAQL		C0304	9	SSAPPLSEL														C0801	9	YILPFSEVL		C0802	9	RSDTSSPEV						C1203	9	SASEVLKEW						C1403	9
								C0303	9	VIDGEFKEL		C0304	9	SSIDPGLSI														C0801	9	YITDLFQVL		C0802	9	RTDAGVHAL						C1203	9	SASFLPKYF						C1403	9
								C0303	9	VIHVPSPAL		C0304	9	SSMLPVMAL														C0801	9	YIVCDFHSL		C0802	9	RTDDNCIVL						C1203	9	SASKIIVFV						C1403	9
								C0303	9	VIIEKTYSL		C0304	9	SSMYPPHPL														C0801	9	YKDGTELEL		C0802	9	RTDDTPVVL						C1203	9	SASPIFTHV						C1403	9
								C0303	9	VIIGSTHVL		C0304	9	SSSAVFLII														C0801	9	YLADIFTKL		C0802	9	RTDEIGVAF						C1203	9	SASPWALTI						C1403	9
								C0303	9	VIIWARLAL		C0304	9	SSSPAVLAL														C0801	9	YLFPGHPPT		C0802	9	RTDMENLVL						C1203	9	SASRVVQVV						C1403	9
								C0303	9	VIMGLSPIL		C0304	9	SSSPVSVVL														C0801	9	YLIEPDVEL		C0802	9	RTDNTCVNL						C1203	9	SASTVVLQV						C1403	9
								C0303	9	VIMPHNMYL		C0304	9	SSTPIAPVF														C0801	9	YLLDLHSYL		C0802	9	RTDPVPVTI						C1203	9	SASVYIKKV						C1403	9
								C0303	9	VINGHTLCL		C0304	9	SSTTVIPTL														C0801	9	YLTAEILEL		C0802	9	RTDRPNFEL						C1203	9	SATELMNIL						C1403	9
								C0303	9	VIPTNVPEL		C0304	9	SSVGALHAL														C0801	9	YLTAEVLEL		C0802	9	RTDVPGELL						C1203	9	SATRLIQRL						C1403	9
								C0303	9	VISLEGKPL		C0304	9	SSVGKVSVL														C0801	9	YQTEIGQTL		C0802	9	RVDDIFSDL						C1203	9	SATSLLHTV						C1403	9
								C0303	9	VIVTPLTEL		C0304	9	SSVHVIMYL														C0801	9	YQYLLVTAL		C0802	9	RVDDPQDVF						C1203	9	SAVDFIRTL						C1403	9
								C0303	9	VIYPARISL		C0304	9	SSVMPGMMM														C0801	9	YQYPRPLLI		C0802	9	RVDDVYSVL						C1203	9	SAVDKVIFV						C1403	9
								C0303	9	VNCFVNNNR		C0304	9	SSVPGVRLL														C0801	9	YSAEPLPEL		C0802	9	RVDEEPTTL						C1203	9	SAVDVHINM						C1403	9
								C0303	9	VNFTVDQIR		C0304	9	STDENFRYL														C0801	9	YSAPVIHVL		C0802	9	RVDELTTDL						C1203	9	SAVELVQEF						C1403	9
								C0303	9	VSAGIQTSF		C0304	9	STFSPSLAL														C0801	9	YSCDHNTSL		C0802	9	RVDKITEYL						C1203	9	SAVEVCVVY						C1403	9
								C0303	9	VSCPYVKTV		C0304	9	STIDKVSVL														C0801	9	YSDDIPHAL		C0802	9	RVDKNAPTV						C1203	9	SAVFNPSVL						C1403	9
								C0303	9	VSDFGGRSL		C0304	9	STIGIHPVC														C0801	9	YSDFVVHEI		C0802	9	RVDLPLAVL						C1203	9	SAVGHVFSL						C1403	9
								C0303	9	VSFPYVIAL		C0304	9	STLNRFSAL														C0801	9	YSDGPGEAL		C0802	9	RVDNFVIAL						C1203	9	SAVGLTAYV						C1403	9
								C0303	9	VSHPRYLEL		C0304	9	STLPALTAL														C0801	9	YSDPVTLET		C0802	9	SAAFPGASL						C1203	9	SAVNIIRTF						C1403	9
								C0303	9	VSIDTVTVL		C0304	9	STPDHSFSL														C0801	9	YSDSFPMEL		C0802	9	SAAGPGFSL						C1203	9	SAVPFLILV						C1403	9
								C0303	9	VSIGDSHCL		C0304	9	SVAKESIPL														C0801	9	YSFHKFHYL		C0802	9	SAAMPGASL						C1203	9	SAVPKVMKV						C1403	9
								C0303	9	VSMPVFQSL		C0304	9	SVIEISRAL														C0801	9	YSFYLPIAA		C0802	9	SAAPEGVPL						C1203	9	SAVRWLLEL						C1403	9
								C0303	9	VTDHNLHEL		C0304	9	SVIIPGMTL														C0801	9	YSFYNQQTL		C0802	9	SAAPPEPAV						C1203	9	SAVSIFHEL						C1403	9
								C0303	9	VTEECVHIL		C0304	9	SVIPPRTEL														C0801	9	YSHFLQFAL		C0802	9	SAAPPGLEA						C1203	9	SAVSILIKP						C1403	9
								C0303	9	VTIARAIEL		C0304	9	SVISVVSYL														C0801	9	YSHVDLVVM		C0802	9	SADACHAEL						C1203	9	SAVTFVLTY						C1403	9
								C0303	9	VTIPSGSTL		C0304	9	SVLDRPRAL														C0801	9	YSLDHISSL		C0802	9	SADAPMFVM						C1203	9	SAVTRLLIL						C1403	9
								C0303	9	VTVPPGPSL		C0304	9	SVNGFISTL														C0801	9	YSLFDNSKL		C0802	9	SADARSFEM						C1203	9	SAWPSLRLY						C1403	9
								C0303	9	VTVQPSPYL		C0304	9	SVVAVPLPL														C0801	9	YSLRDEFPL		C0802	9	SADASQRSL						C1203	9	SAWRVISSI						C1403	9
								C0303	9	VTVRPGLAM		C0304	9	SVVDVFAQL														C0801	9	YSLYPDREL		C0802	9	SADASVNTL						C1203	9	SAWSFITTF						C1403	9
								C0303	9	VVAPAGITL		C0304	9	SVVFHSTVI														C0801	9	YSMPVHAAV		C0802	9	SADCRENVI						C1203	9	SAYAGFLAL						C1403	9
								C0303	9	VVEHPEFLK		C0304	9	TAAFPFAAL														C0801	9	YSNLHEQTL		C0802	9	SADDAEVVL						C1203	9	SAYAQIVQF						C1403	9
								C0303	9	VVIEPISEL		C0304	9	TAAPTIGVL														C0801	9	YSVNDGAQL		C0802	9	SADDFAMEM						C1203	9	SAYARLIDY						C1403	9
								C0303	9	VVIGKMLIL		C0304	9	TAAPVPTTL														C0801	9	YSYFEKETL		C0802	9	SADDFLPTL						C1203	9	SAYEFVTWL						C1403	9
								C0303	9	VVKPPGSSL		C0304	9	TAAPVVPEL														C0801	9	YTADGKEVL		C0802	9	SADDGIRNL						C1203	9	SAYESLMEI						C1403	9
								C0303	9	VVNGRVLEL		C0304	9	TAASPTIAL														C0801	9	YTCPVITNL		C0802	9	SADDIGTLI						C1203	9	SAYGSVKAY						C1403	9
								C0303	9	VVVAVGRAL		C0304	9	TAFHSSMAL														C0801	9	YTDATPLRV		C0802	9	SADDKTVRL						C1203	9	SAYLHPQQF						C1403	9
								C0303	9	VVVDPIQSV		C0304	9	TAFPQRTEL														C0801	9	YTDHQFTEL		C0802	9	SADDLLKTL						C1203	9	SAYPLSVEW						C1403	9
								C0303	9	VVVQAISAL		C0304	9	TAIAESPVI														C0801	9	YTDPSAEEL		C0802	9	SADDWSEHI						C1203	9	SGFSGVIRL						C1403	9
								C0303	9	VVVQPYNSL		C0304	9	TAIDWFHEW														C0801	9	YTHVDDCSL		C0802	9	SADEAHGLL						C1203	9	SGSDIVKLY						C1403	9
								C0303	9	WAEWGHREL		C0304	9	TAIESTPTL														C0801	9	YTIYDSETL		C0802	9	SADEGQTVF						C1203	9	SIAWFTVFY						C1403	9
								C0303	9	WAICPRDSL		C0304	9	TAIIPNSQL														C0801	9	YTSEVQAIL		C0802	9	SADELQKML						C1203	9	SIFEHKIVF						C1403	9
								C0303	9	WAMDLRPEL		C0304	9	TAINHFFIW														C0801	9	YTSPVIPAL		C0802	9	SADELVTRI						C1203	9	SIIGRLLEV						C1403	9
								C0303	9	WAQPGGAAF		C0304	9	TAIPISMVL														C0801	9	YTSPVNPAV		C0802	9	SADEPMTTF						C1203	9	SIITYVVTY						C1403	9
								C0303	9	WAVTGVSSL		C0304	9	TAIPVTQEL														C0801	9	YVADLGDIL		C0802	9	SADERILVI						C1203	9	SIKDGVMVL						C1403	9
								C0303	9	WAYPRQVFI		C0304	9	TAIRSGLEL														C0801	9	YVAQAGLEL		C0802	9	SADERQRML						C1203	9	SIPAITRYW						C1403	9
								C0303	9	WQNPHMLFL		C0304	9	TAISFAPYL														C0801	9	YVDDGLISL		C0802	9	SADESGQIF						C1203	9	SIPDFPMHL						C1403	9
								C0303	9	YAAGAGLCV		C0304	9	TAISLFYEL														C0801	9	YVDDTQFVQ		C0802	9	SADEVMRFF						C1203	9	SITRLIKKY						C1403	9
								C0303	9	YAAGAKLVL		C0304	9	TAISRYMEL														C0801	9	YVDGRVLVV		C0802	9	SADEVQRFF						C1203	9	SIYTGVIIV						C1403	9
								C0303	9	YAAGVHSVL		C0304	9	TALGTFLFL														C0801	9	YVIELQHVV		C0802	9	SADFAELEV						C1203	9	SLAPYVKVF						C1403	9
								C0303	9	YAALCGISL		C0304	9	TALNLFFKL														C0801	9	YVINDLTAV		C0802	9	SADFETVRM						C1203	9	SLFPHAICL						C1403	9
								C0303	9	YAANPGQLF		C0304	9	TALPRIFSL														C0801	9	YVNLPTIAL		C0802	9	SADFPALVV						C1203	9	SLFSVPVIY						C1403	9
								C0303	9	YAAPHFFHL		C0304	9	TALPSFTSL														C0801	9	YVQDYEDFM		C0802	9	SADFPRVGM						C1203	9	SLYDRIVLF						C1403	9
								C0303	9	YAAPWFLTL		C0304	9	TALSFFHML														C0801	9	YVSDLELSA		C0802	9	SADFSPAFL						C1203	9	SMFGGVMVF						C1403	9
								C0303	9	YAAQAHLKL		C0304	9	TANKIFMVL														C0801	9	YVVDDAAVL		C0802	9	SADFTSENF						C1203	9	SMFHNRHLF						C1403	9
								C0303	9	YAAYPLTEV		C0304	9	TASPFFRAL														C0801	9	YVYSGVETL		C0802	9	SADFVVEAI						C1203	9	SNFLHPVIY						C1403	9
								C0303	9	YACEKEVFL		C0304	9	TASPVAVSL																		C0802	9	SADFVVESI						C1203	9	SQANIAQVL						C1403	9
								C0303	9	YACPLPREA		C0304	9	TASPVIKAV																		C0802	9	SADGMRLAL						C1203	9	SQSGLVHIW						C1403	9
								C0303	9	YADGYSPPL		C0304	9	TATFAISIL																		C0802	9	SADHLAHEV						C1203	9	SQYPDIVIV						C1403	9
								C0303	9	YADVGGKQF		C0304	9	TATPRDLVL																		C0802	9	SADIARAEV						C1203	9	SQYPFPVTL						C1403	9
								C0303	9	YADVIVHRL		C0304	9	TAVAPNVAL																		C0802	9	SADIIHRDL						C1203	9	SQYQGVVVY						C1403	9
								C0303	9	YAEMGTRTF		C0304	9	TAVENMPSL																		C0802	9	SADISGLNL						C1203	9	SQYSNVVIF						C1403	9
								C0303	9	YAETIAHIL		C0304	9	TAVMPKVSL																		C0802	9	SADISLERL						C1203	9	SSAPIFTVI						C1403	9
								C0303	9	YAEVGRVLL		C0304	9	TAVPTIFSL																		C0802	9	SADITFATL						C1203	9	SSFPGISIM						C1403	9
								C0303	9	YAFGGGCEL		C0304	9	TAVPYFSNL																		C0802	9	SADKEIMSL						C1203	9	SSFPGVTVI						C1403	9
								C0303	9	YAFPKAVSV		C0304	9	TAYDNFVEL																		C0802	9	SADKFQVLL						C1203	9	SSFPLPKQY						C1403	9
								C0303	9	YAFPKAVTV		C0304	9	TGIPGLEQL																		C0802	9	SADKGSLEV						C1203	9	SSFPTVVIY						C1403	9
								C0303	9	YAFPKSITV		C0304	9	TGIPVHLEL																		C0802	9	SADKPDSVL						C1203	9	SSFTKVITL						C1403	9
								C0303	9	YAFPLAHSL		C0304	9	TIDPIPHQL																		C0802	9	SADKPLSNM						C1203	9	SSFTTIVTY						C1403	9
								C0303	9	YAFSPRNSL		C0304	9	TIDPNTRTL																		C0802	9	SADLEVLDL						C1203	9	SSSAVFLII						C1403	9
								C0303	9	YAFVRPVIL		C0304	9	TIIEATHVL																		C0802	9	SADLIIQEF						C1203	9	SSTILVVRY						C1403	9
								C0303	9	YAHLTPREL		C0304	9	TIIRQNQAL																		C0802	9	SADLIKEKL						C1203	9	SSVEILRVY						C1403	9
								C0303	9	YAHLTYVTL		C0304	9	TIMPRGPTL																		C0802	9	SADLKELSL						C1203	9	SSVHVIMYL						C1403	9
								C0303	9	YAIARFKFL		C0304	9	TITDIISAL																		C0802	9	SADLPESTL						C1203	9	SSVPGVRLL						C1403	9
								C0303	9	YAIDNPLHY		C0304	9	TIVDTGIGM																		C0802	9	SADLRADAM						C1203	9	SSYDKPITF						C1403	9
								C0303	9	YAIESQLQL		C0304	9	TIYDRFVHL																		C0802	9	SADLYYTSF						C1203	9	SSYLFIVKY						C1403	9
								C0303	9	YAIEVDPVL		C0304	9	TIYHMFIAL																		C0802	9	SADMSHVAL						C1203	9	SSYYNVTYW						C1403	9
								C0303	9	YAIGLVMRL		C0304	9	TSSPSILTL																		C0802	9	SADNVRQQL						C1203	9	STCEFVRTL						C1403	9
								C0303	9	YAIGNAPEL		C0304	9	TSVPVSAVF																		C0802	9	SADPEVMLL						C1203	9	STFSGIKEL						C1403	9
								C0303	9	YAIGVSHPL		C0304	9	TTIKPGLAL																		C0802	9	SADPGILVL						C1203	9	STIDKVSVL						C1403	9
								C0303	9	YAIHGVLEV		C0304	9	TTMVPTAAL																		C0802	9	SADPGVFVL						C1203	9	STILHLVVM						C1403	9
								C0303	9	YAINQPDVL		C0304	9	TVIGAFWHL																		C0802	9	SADPLNSAF						C1203	9	STKPPGTFL						C1403	9
								C0303	9	YAIPKFKHL		C0304	9	TVIPHLMAL																		C0802	9	SADPNVVDL						C1203	9	STVHFIIFV						C1403	9
								C0303	9	YAISKPEVL		C0304	9	TVYLRDIAL																		C0802	9	SADPRHILL						C1203	9	STYPAPFYV						C1403	9
								C0303	9	YAISPGLDI		C0304	9	TVYVSMIAL																		C0802	9	SADPRPLAV						C1203	9	SVADLAHVL						C1403	9
								C0303	9	YAITRVLRL		C0304	9	VAAKKNVSI																		C0802	9	SADQAVAEL						C1203	9	SVEDIFSEV						C1403	9
								C0303	9	YAITTLHNL		C0304	9	VAAPASLSL																		C0802	9	SADQKTTLL						C1203	9	SVFGGLVNY						C1403	9
								C0303	9	YAIVNFITF		C0304	9	VAAPLGPLL																		C0802	9	SADQSPSAL						C1203	9	SVFPGARLL						C1403	9
								C0303	9	YAKDDPLEF		C0304	9	VADAIRTSL																		C0802	9	SADQVTRAL						C1203	9	SVIDHIHLI						C1403	9
								C0303	9	YAKRPGIGL		C0304	9	VADPVYRTF																		C0802	9	SADRFVTLL						C1203	9	SVISHLLRV						C1403	9
								C0303	9	YALDLSTFL		C0304	9	VADPYVVIM																		C0802	9	SADSANDGF						C1203	9	SVKWPNSVM						C1403	9
								C0303	9	YALERLKVM		C0304	9	VADTVYRAL																		C0802	9	SADSIGAVL						C1203	9	SVLPFQIYY						C1403	9
								C0303	9	YALGALNHL		C0304	9	VADVRLYSL																		C0802	9	SADSKPIDV						C1203	9	SVVSFLLRV						C1403	9
								C0303	9	YALNHTLSV		C0304	9	VAFDKFWNM																		C0802	9	SADSLEHVL						C1203	9	SVYSRVIQV						C1403	9
								C0303	9	YALPAGLSA		C0304	9	VAFGPAFAL																		C0802	9	SADSPSPGL						C1203	9	SVYSWDIVV						C1403	9
								C0303	9	YALPKSLSV		C0304	9	VAFPSPAEL																		C0802	9	SADSRIAEL						C1203	9	TAADIFKQY						C1403	9
								C0303	9	YALTAIMKL		C0304	9	VAFQHFQEL																		C0802	9	SADSRIVKM						C1203	9	TAADLGSVV						C1403	9
								C0303	9	YALYVRDTL		C0304	9	VAFSPVTEL																		C0802	9	SADTFTRNL						C1203	9	TAADTVIIY						C1403	9
								C0303	9	YAMDELRSL		C0304	9	VAFVGGIDL																		C0802	9	SADTPCATV						C1203	9	TAADVVKQW						C1403	9
								C0303	9	YAMDIVKGL		C0304	9	VAIFAVDSL																		C0802	9	SADTPEASL						C1203	9	TAAFWTRLY						C1403	9
								C0303	9	YANAKIYKL		C0304	9	VAIFPSPMM																		C0802	9	SADTTILFV						C1203	9	TAAGIHPQI						C1403	9
								C0303	9	YANAVLQAL		C0304	9	VAIIARTDL																		C0802	9	SADTVVIFD						C1203	9	TAAPTIGVL						C1403	9
								C0303	9	YANEVGEAF		C0304	9	VAIKAGTTL																		C0802	9	SADVAAVVM						C1203	9	TAAVHIILV						C1403	9
								C0303	9	YANSKAVTL		C0304	9	VAILRHPTL																		C0802	9	SADVATPKM						C1203	9	TAFETIILL						C1403	9
								C0303	9	YANYYTREV		C0304	9	VAIQAVLSL																		C0802	9	SADVDIHHL						C1203	9	TAFGGFLKY						C1403	9
								C0303	9	YAQIRTIAI		C0304	9	VALDFEQEM																		C0802	9	SADVDIKEL						C1203	9	TAFPEASFL						C1403	9
								C0303	9	YAQLHSFTL		C0304	9	VALGNMYEL																		C0802	9	SADVKEVLL						C1203	9	TAFPFQVEV						C1403	9
								C0303	9	YAQLHSLTL		C0304	9	VALLRVTPF																		C0802	9	SADVRCSVF						C1203	9	TAFPKPLLT						C1403	9
								C0303	9	YASDFHNVL		C0304	9	VALNAHTFL																		C0802	9	SADVSGLAV						C1203	9	TAFQRPQLM						C1403	9
								C0303	9	YASNITSVL		C0304	9	VALPASGWL																		C0802	9	SADWSLEAL						C1203	9	TAFSRLILI						C1403	9
								C0303	9	YASSPGMSL		C0304	9	VALPMVLVL																		C0802	9	SADYSTPPH						C1203	9	TAFVEPFVI						C1403	9
								C0303	9	YATLFAQAL		C0304	9	VALPPGLAV																		C0802	9	SAEAEASRL						C1203	9	TAFVEPLVI						C1403	9
								C0303	9	YAVELFEGL		C0304	9	VALPVVYSL																		C0802	9	SAEAPSHHL						C1203	9	TAHPSPLSV						C1403	9
								C0303	9	YAVGDVKCL		C0304	9	VALPVYLLI																		C0802	9	SAEAVTTTL						C1203	9	TAIELIPSV						C1403	9
								C0303	9	YAVGGYTRL		C0304	9	VALVVGHEL																		C0802	9	SAEEMVTLL						C1203	9	TAIGHINRY						C1403	9
								C0303	9	YAVHEGLGL		C0304	9	VAMTGEITL																		C0802	9	SAEEVAKEL						C1203	9	TAMKKVFRV						C1403	9
								C0303	9	YAVMRAAEM		C0304	9	VAMYGGLVL																		C0802	9	SAEHSHPAL						C1203	9	TAQTLVRIL						C1403	9
								C0303	9	YAVNSQFTM		C0304	9	VANGKLMIL																		C0802	9	SAELASMEL						C1203	9	TASDKILIV						C1403	9
								C0303	9	YAVTGDVKM		C0304	9	VANPEHMEM																		C0802	9	SAEPAGTPL						C1203	9	TASEMILVL						C1403	9
								C0303	9	YAYEKPHVV		C0304	9	VANPNSAIF																		C0802	9	SAEQAKVVL						C1203	9	TASKVIVAV						C1403	9
								C0303	9	YAYETKDAL		C0304	9	VANPVPASL																		C0802	9	SAETPTIPL						C1203	9	TASPLVKSV						C1403	9
								C0303	9	YAYEWQRCL		C0304	9	VANVSLLAL																		C0802	9	SASPPGPTL						C1203	9	TASPVAVSL						C1403	9
								C0303	9	YAYGQYNMP		C0304	9	VAQELPTTL																		C0802	9	SATDPVTVL						C1203	9	TASPVIKAV						C1403	9
								C0303	9	YAYLKAIVL		C0304	9	VAQFKFTVL																		C0802	9	SDSSSAPAF						C1203	9	TATALAIIY						C1403	9
								C0303	9	YAYLYIRML		C0304	9	VAQGGWRSL																		C0802	9	SFDAVLEAL						C1203	9	TATMHILVV						C1403	9
								C0303	9	YAYPGVLLI		C0304	9	VAQTWFRFL																		C0802	9	SGDDNLTSL						C1203	9	TATPITIRY						C1403	9
								C0303	9	YAYTGRLEL		C0304	9	VASEIMAVL																		C0802	9	SGDGGRAEL						C1203	9	TAVALLRLL						C1403	9
								C0303	9	YAYTSRVIL		C0304	9	VASEYPVIL																		C0802	9	SGDGVTHTV						C1203	9	TAVFLTGVL						C1403	9
								C0303	9	YGIEHALAL		C0304	9	VASFPRTVL																		C0802	9	SGDGVTHVI						C1203	9	TAVKIAPRY						C1403	9
								C0303	9	YGINNIREL		C0304	9	VATAADLEL																		C0802	9	SGDKVGSSL						C1203	9	TAVRWVVTL						C1403	9
								C0303	9	YGITSPISL		C0304	9	VATAMARVL																		C0802	9	SGDPSIQTL						C1203	9	TAVWLPRYY						C1403	9
								C0303	9	YGLEPAHPL		C0304	9	VATDFFTVL																		C0802	9	SGDVDSLEL						C1203	9	TAYAYATVL						C1403	9
								C0303	9	YGNPNTLRL		C0304	9	VATGVISTL																		C0802	9	SGLDLNTSL						C1203	9	TAYIHQVTV						C1403	9
								C0303	9	YGSFVTRAL		C0304	9	VATKIFQEL																		C0802	9	SIDAEVREL						C1203	9	TAYNLVHEL						C1403	9
								C0303	9	YGSPNALVL		C0304	9	VATLYGLSL																		C0802	9	SIDAGSKEL						C1203	9	TAYPGQTQY						C1403	9
								C0303	9	YGSPQSPQL		C0304	9	VATQVGIEW																		C0802	9	SIDDLPTVL						C1203	9	TAYPQVVVV						C1403	9
								C0303	9	YGVTVFKAL		C0304	9	VAVDGINAL																		C0802	9	SIDDQLNTL						C1203	9	TAYPSLRLI						C1403	9
								C0303	9	YGYEHILTL		C0304	9	VAVDVNNML																		C0802	9	SIDDVDSKL						C1203	9	TAYTRQQVL						C1403	9
								C0303	9	YGYSNPKIL		C0304	9	VAVGSGLSW																		C0802	9	SIDFDQGEL						C1203	9	TAYYRLLIT						C1403	9
								C0303	9	YIDDVFHAL		C0304	9	VAVGVIKAV																		C0802	9	SIDFPLTKV						C1203	9	TGFPWAFKV						C1403	9
								C0303	9	YIDEGRLVL		C0304	9	VAVHVFSEF																		C0802	9	SIDICHQVL						C1203	9	TGTHLVLTV						C1403	9
								C0303	9	YIFDNCHEL		C0304	9	VAVISGEAL																		C0802	9	SIDKAVTKL						C1203	9	TGYSEVIVV						C1403	9
								C0303	9	YIIIPKSSL		C0304	9	VAVMTVREL																		C0802	9	SIDKTGENF						C1203	9	TIKHWITII						C1403	9
								C0303	9	YIIPVVLFL		C0304	9	VAVNKPAEF																		C0802	9	SIDQTGELL						C1203	9	TINGKIAVL						C1403	9
								C0303	9	YIIVPPLTL		C0304	9	VAVPGGVDL																		C0802	9	SIDRNPPQL						C1203	9	TIYPGLMIT						C1403	9
								C0303	9	YILDPKQAL		C0304	9	VAVPTLNAL																		C0802	9	SIDSAGIQL						C1203	9	TLVDFIIIH						C1403	9
								C0303	9	YILGKFFAL		C0304	9	VAVPVAVTF																		C0802	9	SIDTHGETF						C1203	9	TLVHFVVTW						C1403	9
								C0303	9	YILPFSEVL		C0304	9	VAVQHFSLL																		C0802	9	SIEDKVKAL						C1203	9	TMFVQRQVF						C1403	9
								C0303	9	YIMDWMDEM		C0304	9	VAVSPSLDL																		C0802	9	SIELPSMAV						C1203	9	TMYPFIVTL						C1403	9
								C0303	9	YINPRAVQL		C0304	9	VAYDNAVNL																		C0802	9	SLDAVNLAL						C1203	9	TQPTHSWKV						C1403	9
								C0303	9	YIPNKVLIL		C0304	9	VAYFGLTTL																		C0802	9	SLDDSCSQL						C1203	9	TSAAIYHVL						C1403	9
								C0303	9	YIQQKVRVL		C0304	9	VAYGKGTYF																		C0802	9	SLDIPATYL						C1203	9	TSFPSPMEI						C1403	9
								C0303	9	YISAKPLEM		C0304	9	VAYLQAHAL																		C0802	9	SLDKDIVAL						C1203	9	TSFPSPVSV						C1403	9
								C0303	9	YITDFLARL		C0304	9	VAYMNPIAM																		C0802	9	SLDLPHSEL						C1203	9	TSIGWLRLL						C1403	9
								C0303	9	YITDLFQVL		C0304	9	VAYPGIPKL																		C0802	9	SLDNGGCAL						C1203	9	TSSPINIVV						C1403	9
								C0303	9	YIVAVYHCM		C0304	9	VAYVSSVAL																		C0802	9	SLDQPGGTL						C1203	9	TSSPSILTL						C1403	9
								C0303	9	YIVDHTIIM		C0304	9	VAYWRQAGL																		C0802	9	SLDQPTQTV						C1203	9	TSYPDPILL						C1403	9
								C0303	9	YIVKWPLSL		C0304	9	VCNPIITKL																		C0802	9	SLDQPVTAL						C1203	9	TTFPRPVTV						C1403	9
								C0303	9	YLAPHVRTL		C0304	9	VGAEPLLPW																		C0802	9	SLDRPFTNL						C1203	9	TTIDIGVKY						C1403	9
								C0303	9	YLFERIKEL		C0304	9	VGAPVGIAL																		C0802	9	SLDSPSYVL						C1203	9	TTSWIHPVM						C1403	9
								C0303	9	YLIARVMLL		C0304	9	VGDPSVHLL																		C0802	9	SLDSSGFSL						C1203	9	TTVKFVVKM						C1403	9
								C0303	9	YLIGVHASL		C0304	9	VGIKPSLEL																		C0802	9	SLEPVAVEL						C1203	9	TTVPFGVTY						C1403	9
								C0303	9	YLIPFSSKL		C0304	9	VGVPVGSAL																		C0802	9	SMDDHKLSL						C1203	9	TTVPGVIRY						C1403	9
								C0303	9	YLLDHFLSM		C0304	9	VIAPNPAQL																		C0802	9	SMDEINKQL						C1203	9	TVSGRILVV						C1403	9
								C0303	9	YLLDLHSYL		C0304	9	VIIEKTYSL																		C0802	9	SMDSSHVSL						C1203	9	TVTTVILEV						C1403	9
								C0303	9	YLLEKSRIV		C0304	9	VIIGKTVTL																		C0802	9	SNDDAVRVL						C1203	9	TVVNFLIRV						C1403	9
								C0303	9	YLLEKSRVI		C0304	9	VIIGSTHVL																		C0802	9	SNDIVNAIM						C1203	9	TVYGGLMYI						C1403	9
								C0303	9	YLNGYIYIL		C0304	9	VIIPRYLTL																		C0802	9	SPSDPSSSL						C1203	9	TVYPVAIKY						C1403	9
								C0303	9	YLQIHPQEL		C0304	9	VIIWARLAL																		C0802	9	SQDARFYAL						C1203	9	TWINHFVIW						C1403	9
								C0303	9	YLTAEILEL		C0304	9	VILEPMQEL																		C0802	9	SQDDPLHPL						C1203	9	TWINHLVTW						C1403	9
								C0303	9	YLTPLILTL		C0304	9	VIMGLSPIL																		C0802	9	SQDFVESVL						C1203	9	VAADILNRL						C1403	9
								C0303	9	YLVPQARAL		C0304	9	VIMPHNMYL																		C0802	9	SQDGPLSVL						C1203	9	VAAEAFSEL						C1403	9
								C0303	9	YNIQKESTL		C0304	9	VINDWFKVL																		C0802	9	SQDIVNQVL						C1203	9	VAAHLVIIM						C1403	9
								C0303	9	YQEKGVRVL		C0304	9	VIVTPLTEL																		C0802	9	SQDLAFLSM						C1203	9	VAANRVIIF						C1403	9
								C0303	9	YQEVGAKVL		C0304	9	VIYPARISL																		C0802	9	SQDLGQHGL						C1203	9	VAAPFRCEF						C1403	9
								C0303	9	YQIAVTKVL		C0304	9	VNNPHFLIM																		C0802	9	SQDLKLSTI						C1203	9	VAAPQVQQV						C1403	9
								C0303	9	YQIDTVINL		C0304	9	VSDFGGRSL																		C0802	9	SQDLLPLSL						C1203	9	VAASLIQKM						C1403	9
								C0303	9	YQIPTENSM		C0304	9	VSFPYVIAL																		C0802	9	SQDLTHLNL						C1203	9	VAASNIVQM						C1403	9
								C0303	9	YQNPQITQL		C0304	9	VSHPRYLEL																		C0802	9	SQDLVQVEV						C1203	9	VAATLLKQL						C1403	9
								C0303	9	YQQELEREL		C0304	9	VSIAPLLEL																		C0802	9	SQDPGAVVL						C1203	9	VAFDAVLRF						C1403	9
								C0303	9	YSAPCTYEL		C0304	9	VSIRTGLEL																		C0802	9	SQDPGTHVV						C1203	9	VAFDVEIHM						C1403	9
								C0303	9	YSAPVIHVL		C0304	9	VSMPVFQSL																		C0802	9	SQDPNRVEL						C1203	9	VAFEMCSQL						C1403	9
								C0303	9	YSDDIPHAL		C0304	9	VSSPTMPHL																		C0802	9	SQDVNKQGL						C1203	9	VAFHIPFEV						C1403	9
								C0303	9	YSFDYPSDM		C0304	9	VSTPQIVSL																		C0802	9	SQDVTTVTL						C1203	9	VAFHTQLFF						C1403	9
								C0303	9	YSFHKFHYL		C0304	9	VSVPYPSSL																		C0802	9	SQDYPTLAF						C1203	9	VAFNQPVKL						C1403	9
								C0303	9	YSIAQFKYL		C0304	9	VSYPLSLEL																		C0802	9	SQDYVANEL						C1203	9	VAFNWIIVH						C1403	9
								C0303	9	YSIGPNSKL		C0304	9	VTDHNLHEL																		C0802	9	SSADINSSL						C1203	9	VAFPKSLVA						C1403	9
								C0303	9	YSINMNVFL		C0304	9	VTIARAIEL																		C0802	9	SSDAPGNVL						C1203	9	VAFPSPAEL						C1403	9
								C0303	9	YSIVGLSSL		C0304	9	VTVPPGPSL																		C0802	9	SSDDINKFL						C1203	9	VAFPSSSVY						C1403	9
								C0303	9	YSIYVYKVL		C0304	9	VTVQPSPYL																		C0802	9	SSDDYGKDL						C1203	9	VAFPTEIKV						C1403	9
								C0303	9	YSKLPGVSL		C0304	9	VTVRPGLAM																		C0802	9	SSDECVVAL						C1203	9	VAFSEIMSM						C1403	9
								C0303	9	YSLCPGREL		C0304	9	VVAPAGITL																		C0802	9	SSDEDILCL						C1203	9	VAFSPVTEL						C1403	9
								C0303	9	YSLDHISSL		C0304	9	VVAPAGVTL																		C0802	9	SSDGHEFIV						C1203	9	VAFSQVLTI						C1403	9
								C0303	9	YSLPNAPTL		C0304	9	VVAPPGVVV																		C0802	9	SSDIQVKEL						C1203	9	VAFYIPMSV						C1403	9
								C0303	9	YSMPSTHAM		C0304	9	VVIEPISEL																		C0802	9	SSDKPGLDL						C1203	9	VAHYPPVQV						C1403	9
								C0303	9	YSMPVHAAV		C0304	9	VVIGKMLIL																		C0802	9	SSDLFLISM						C1203	9	VAIAAARVW						C1403	9
								C0303	9	YSSMFFITL		C0304	9	VVIGNIGAL																		C0802	9	SSDLGLQAL						C1203	9	VAIAKVKLY						C1403	9
								C0303	9	YSSPFDPVL		C0304	9	VVKPPGSSL																		C0802	9	SSDLHLVTL						C1203	9	VAIEMLLKL						C1403	9
								C0303	9	YSTPHAFTF		C0304	9	VVNGAFMVL																		C0802	9	SSDLPGGEF						C1203	9	VAINHIVDF						C1403	9
								C0303	9	YSVPSSQEL		C0304	9	VVNGRVLEL																		C0802	9	SSDLPVALL						C1203	9	VAINLIVQH						C1403	9
								C0303	9	YSVRVSPQM		C0304	9	VVVAVGRAL																		C0802	9	SSDMSSREL						C1203	9	VAINRLLSM						C1403	9
								C0303	9	YSVYVYKVL		C0304	9	VVVDPIQSV																		C0802	9	SSDNPNVLV						C1203	9	VAIPSYICY						C1403	9
								C0303	9	YSWVGRPLL		C0304	9	VVVQPYNSL																		C0802	9	SSDNPQPEM						C1203	9	VAIPVSIFY						C1403	9
								C0303	9	YSYDLSHSL		C0304	9	WADAMAKVL																		C0802	9	SSDPEVLTL						C1203	9	VAIQSVRCY						C1403	9
								C0303	9	YSYFSPRTM		C0304	9	WAEWGHREL																		C0802	9	SSDPKVLTL						C1203	9	VAIVRPSIV						C1403	9
								C0303	9	YTIENPRHF		C0304	9	WAMDLRPEL																		C0802	9	SSDPMLSEF						C1203	9	VAKIVAETM						C1403	9
								C0303	9	YTIPAHQNL		C0304	9	WAQPGGAAF																		C0802	9	SSDPSLIGL						C1203	9	VAKMYISEL						C1403	9
								C0303	9	YTIPLAIKL		C0304	9	WASEVGPVL																		C0802	9	SSDRAIQSL						C1203	9	VAKPPVMSF						C1403	9
								C0303	9	YTIPLSPVL		C0304	9	WASPPGRWL																		C0802	9	SSDSPTNHF						C1203	9	VAKWATVTF						C1403	9
								C0303	9	YTIPPGHQV		C0304	9	WAVSPETEL																		C0802	9	SSDSQILDL						C1203	9	VALDFEQEM						C1403	9
								C0303	9	YTLINHRVL		C0304	9	WAVTGVSSL																		C0802	9	SSDTSGLSF						C1203	9	VALDKVIEI						C1403	9
								C0303	9	YTMVYWHAL		C0304	9	WAYPRQVFI																		C0802	9	SSDVQKNAL						C1203	9	VALLRVTPF						C1403	9
								C0303	9	YTNGKCVIL		C0304	9	WQNPHMLFL																		C0802	9	SSDVRNSAL						C1203	9	VALNFIISY						C1403	9
								C0303	9	YTSEVQAIL		C0304	9	WSQDLFRAL																		C0802	9	SSDVTKASL						C1203	9	VALPMVLVL						C1403	9
								C0303	9	YTSGTFRTV		C0304	9	YAADNQIYI																		C0802	9	SSDVVVQVL						C1203	9	VAMERVSVL						C1403	9
								C0303	9	YTSPVNPAV		C0304	9	YAAGAKLVL																		C0802	9	SSDVVYNAF						C1203	9	VAMGRVVKV						C1403	9
								C0303	9	YTTDFIYQL		C0304	9	YAANPGQLF																		C0802	9	SSDWVTTDI						C1203	9	VAMKFAQVF						C1403	9
								C0303	9	YTTDRVMTV		C0304	9	YAAPHFFHL																		C0802	9	SSNLELHSL						C1203	9	VANPNSAIF						C1403	9
								C0303	9	YTVKAILIL		C0304	9	YAAPWFLTL																		C0802	9	STDEEVTSL						C1203	9	VARDLRAEF						C1403	9
								C0303	9	YTVLTRIGL		C0304	9	YAAQAHLKL																		C0802	9	STDFPQMQL						C1203	9	VARPDVVEM						C1403	9
								C0303	9	YTVVYFPVR		C0304	9	YAASAIGYL																		C0802	9	STDFPSTSI						C1203	9	VARSNILTL						C1403	9
								C0303	9	YVADPGGSL		C0304	9	YAASDMLQL																		C0802	9	STDGAPAQL						C1203	9	VASAVFGVI						C1403	9
								C0303	9	YVAQAGLEL		C0304	9	YAAYPLTEV																		C0802	9	STDGIGFAI						C1203	9	VASDLVMKV						C1403	9
								C0303	9	YVDPVNKVL		C0304	9	YADPSILYI																		C0802	9	STDSFNNEL						C1203	9	VASEGIKRY						C1403	9
								C0303	9	YVFPGVTRL		C0304	9	YADVGGKQF																		C0802	9	STDTVEHSL						C1203	9	VASEIMAVL						C1403	9
								C0303	9	YVHPFIFAL		C0304	9	YADVIVHRL																		C0802	9	STDVCGTKL						C1203	9	VASGMILVM						C1403	9
								C0303	9	YVIAYIRDL		C0304	9	YAEDRERFF																		C0802	9	STDYETHEF						C1203	9	VASNVPKVV						C1403	9
								C0303	9	YVIDPIKGL		C0304	9	YAEEFRTYL																		C0802	9	SVDAHTAEV						C1203	9	VASPFYLII						C1403	9
								C0303	9	YVINVTTHL		C0304	9	YAEIVHLTL																		C0802	9	SVDDAAIVI						C1203	9	VASPQVHFI						C1403	9
								C0303	9	YVIQKFFEF		C0304	9	YAENAMRYI																		C0802	9	SVDDFSSAL						C1203	9	VASQLPRIF						C1403	9
								C0303	9	YVNLPTIAL		C0304	9	YAETIAHIL																		C0802	9	SVDDTIVAL						C1203	9	VATDFFTVL						C1403	9
								C0303	9	YVSPRILTA		C0304	9	YAEVGRVLL																		C0802	9	SVDDYQHRL						C1203	9	VATFILQKI						C1403	9
								C0303	9	YVTESQPDL		C0304	9	YAFDFARQS																		C0802	9	SVDETTQAM						C1203	9	VATSRIIKY						C1403	9
								C0303	9	YVVPYMIHL		C0304	9	YAFGGGCEL																		C0802	9	SVDEVARQL						C1203	9	VAVCRIPVL						C1403	9
								C0303	9	YVVPYTIHL		C0304	9	YAFNHSADF																		C0802	9	SVDEVEISV						C1203	9	VAVDGLNQL						C1403	9
								C0303	9	YYVDFFKTL		C0304	9	YAFPKAVSV																		C0802	9	SVDGDTRMV						C1203	9	VAVEFIQEW						C1403	9
												C0304	9	YAFPKAVTV																		C0802	9	SVDGSPLLL						C1203	9	VAVGFPMMI						C1403	9
												C0304	9	YAFPKSITV																		C0802	9	SVDIGSLAI						C1203	9	VAVGRALYY						C1403	9
												C0304	9	YAFPLAHSL																		C0802	9	SVDISGLQL						C1203	9	VAVGVIKAV						C1403	9
												C0304	9	YAFPVSNNL																		C0802	9	SVDKPGIVV						C1203	9	VAVHLILYV						C1403	9
												C0304	9	YAFQDDRYL																		C0802	9	SVDLRGAAL						C1203	9	VAVNYIPEV						C1403	9
												C0304	9	YAFSGVEEL																		C0802	9	SVDPAGVTM						C1203	9	VAVPLGMTV						C1403	9
												C0304	9	YAFSPRNSL																		C0802	9	SVDSELTSL						C1203	9	VAVPVAVTF						C1403	9
												C0304	9	YAFTALDAL																		C0802	9	SVDSHFCHL						C1203	9	VAWDIPITY						C1403	9
												C0304	9	YAFVRPVIL																		C0802	9	SVDSHFSHL						C1203	9	VAYGKGTYF						C1403	9
												C0304	9	YAGDVSMFL																		C0802	9	SVDSKPPVI						C1203	9	VAYGQVLGV						C1403	9
												C0304	9	YAGYIPQAF																		C0802	9	SVDTRCSSL						C1203	9	VAYMNPIAM						C1403	9
												C0304	9	YAHLTPREL																		C0802	9	SVDVTNTTF						C1203	9	VAYPCAILY						C1403	9
												C0304	9	YAHLTYVTL																		C0802	9	SVDWPESFV						C1203	9	VAYPGIPKL						C1403	9
												C0304	9	YAIARFKFL																		C0802	9	SVDWPESSL						C1203	9	VAYPLYILY						C1403	9
												C0304	9	YAIDNPLHY																		C0802	9	SWDEAVQAL						C1203	9	VAYQHAFLY						C1403	9
												C0304	9	YAIEKVREI																		C0802	9	TAASPTIAL						C1203	9	VAYQKDRRW						C1403	9
												C0304	9	YAIESQLQL																		C0802	9	TAAVWAVKI						C1203	9	VAYWDVLKA						C1403	9
												C0304	9	YAIEVDPVL																		C0802	9	TADAMNREV						C1203	9	VAYWRQAGL						C1403	9
												C0304	9	YAIFKSQDF																		C0802	9	TADCPGHGL						C1203	9	VFYPYPQYF						C1403	9
												C0304	9	YAIGLVMRL																		C0802	9	TADDFLVFL						C1203	9	VGFDAVMRV						C1403	9
												C0304	9	YAIGVSHPL																		C0802	9	TADDPSLSL						C1203	9	VGFEEVIVV						C1403	9
												C0304	9	YAIHGVLEV																		C0802	9	TADEIQNTL						C1203	9	VGIENIHVM						C1403	9
												C0304	9	YAINFIHAT																		C0802	9	TADEVHYFL						C1203	9	VGIPHIRWY						C1403	9
												C0304	9	YAINQPDVL																		C0802	9	TADFPPSKL						C1203	9	VGVDFALKV						C1403	9
												C0304	9	YAIPKFKHL																		C0802	9	TADFVNYYF						C1203	9	VGYDGPIYM						C1403	9
												C0304	9	YAIRGVPSL																		C0802	9	TADGAHFEL						C1203	9	VIGDVIRVY						C1403	9
												C0304	9	YAISKPEVL																		C0802	9	TADGDLYTL						C1203	9	VIPPFVFMV						C1403	9
												C0304	9	YAISPGLDI																		C0802	9	TADGICSMM						C1203	9	VLFEHAVGY						C1403	9
												C0304	9	YAITTLHNL																		C0802	9	TADGIVSHL						C1203	9	VLFGKPMVV						C1403	9
												C0304	9	YAKDDPLEF																		C0802	9	TADGRVVKL						C1203	9	VLFHNTIYY						C1403	9
												C0304	9	YAKRPGIGL																		C0802	9	TADGVAVIP						C1203	9	VLFTQLIYY						C1403	9
												C0304	9	YALDLSTFL																		C0802	9	TADIAIVAL						C1203	9	VLVDHVVEF						C1403	9
												C0304	9	YALERLKVM																		C0802	9	TADIPALFL						C1203	9	VLYDRVLKY						C1403	9
												C0304	9	YALGALNHL																		C0802	9	TADISDVWL						C1203	9	VQIDITRVF						C1403	9
												C0304	9	YALLGRTLL																		C0802	9	TADIVINLL						C1203	9	VQINVPITF						C1403	9
												C0304	9	YALNHTLSV																		C0802	9	TADKLQEFL						C1203	9	VSAAIVKEL						C1403	9
												C0304	9	YALPAGLEV																		C0802	9	TADLDITEI						C1203	9	VSAENILTV						C1403	9
												C0304	9	YALPAGLSA																		C0802	9	TADLFLTTL						C1203	9	VSFPYVIAL						C1403	9
												C0304	9	YALPKSLSV																		C0802	9	TADLPKQSI						C1203	9	VSFQEVVTF						C1403	9
												C0304	9	YALTAIMKL																		C0802	9	TADLPNELI						C1203	9	VSGDFVKVY						C1403	9
												C0304	9	YALTSPLQL																		C0802	9	TADNISHGL						C1203	9	VSSHIASML						C1403	9
												C0304	9	YAMDELRSL																		C0802	9	TADNLVLNL						C1203	9	VSVPFPVTH						C1403	9
												C0304	9	YAMDIVKGL																		C0802	9	TADRIPIAV						C1203	9	VSVPLIVRY						C1403	9
												C0304	9	YAMISSPFM																		C0802	9	TADSQPPVF						C1203	9	VSVQGIIIY						C1403	9
												C0304	9	YANAKIYKL																		C0802	9	TADTILNTL						C1203	9	VSYGSIVTY						C1403	9
												C0304	9	YANAVLQAL																		C0802	9	TADTSKVSL						C1203	9	VSYSLPIVL						C1403	9
												C0304	9	YANDVTRVL																		C0802	9	TADVIVNSV						C1203	9	VTFPECVRW						C1403	9
												C0304	9	YANFNRIIL																		C0802	9	TADVKASVL						C1203	9	VTFPGIKLI						C1403	9
												C0304	9	YANSKAVTL																		C0802	9	TADVSHTNL						C1203	9	VTFSGIHLL						C1403	9
												C0304	9	YANYYTREV																		C0802	9	TADVTSAVM						C1203	9	VTIDRVMSY						C1403	9
												C0304	9	YAPYPSPVL																		C0802	9	TAEAIQTPL						C1203	9	VTIVKPIVY						C1403	9
												C0304	9	YAQIRTIAI																		C0802	9	TAEERVAEL						C1203	9	VTKPNPSFM						C1403	9
												C0304	9	YAQLHSLTL																		C0802	9	TAEHPGTRL						C1203	9	VTSCIHNIL						C1403	9
												C0304	9	YASDYFDQL																		C0802	9	TAESRVSVL						C1203	9	VTSPVLVIH						C1403	9
												C0304	9	YASGINVNL																		C0802	9	TAETPSRPL						C1203	9	VTVAFVQEY						C1403	9
												C0304	9	YASLRIEEL																		C0802	9	TAIDDRCEL						C1203	9	VTYGFPIML						C1403	9
												C0304	9	YASNITSVL																		C0802	9	TASEPSAQL						C1203	9	VTYNYPVHY						C1403	9
												C0304	9	YASSPGMSL																		C0802	9	TGDTPGLEV						C1203	9	VTYPGELLL						C1403	9
												C0304	9	YATIILSKM																		C0802	9	TGDVMSLSL						C1203	9	VTYSFRQSF						C1403	9
												C0304	9	YATLFAQAL																		C0802	9	TGDVPHTSV						C1203	9	VTYSHEVYF						C1403	9
												C0304	9	YAVELFEGL																		C0802	9	TGTVEFKEF						C1203	9	VVKMPSGEF						C1403	9
												C0304	9	YAVGGYTRL																		C0802	9	TIDADAPEL						C1203	9	VVPQFVVFY						C1403	9
												C0304	9	YAVGIQQVL																		C0802	9	TIDADQRVL						C1203	9	VVYPILVEF						C1403	9
												C0304	9	YAVHEGLGL																		C0802	9	TIDATGNSV						C1203	9	VVYPWTQRF						C1403	9
												C0304	9	YAVNSQFTM																		C0802	9	TIDDGIFEV						C1203	9	VWKLRIVSY						C1403	9
												C0304	9	YAVRDTIAL																		C0802	9	TIDESGSIL						C1203	9	WAAPIRKLY						C1403	9
												C0304	9	YAVTGDVKM																		C0802	9	TIDESLSEL						C1203	9	WAYARTINV						C1403	9
												C0304	9	YAYAAQNLL																		C0802	9	TIDPNTRTL						C1203	9	WAYPRQVFI						C1403	9
												C0304	9	YAYDGKDYI																		C0802	9	TIDQGMAAL						C1203	9	WGYPHPFLI						C1403	9
												C0304	9	YAYEKPHVV																		C0802	9	TIDSSGPSL						C1203	9	WSYPYEHSY						C1403	9
												C0304	9	YAYETKDAL																		C0802	9	TIDTENSTV						C1203	9	YAAAQLRQY						C1403	9
												C0304	9	YAYFNFPEL																		C0802	9	TIDTSRVSL						C1203	9	YAAELIERV						C1403	9
												C0304	9	YAYGQYNMP																		C0802	9	TIEDAIAVL						C1203	9	YAAGFIFTT						C1403	9
												C0304	9	YAYLKAIVL																		C0802	9	TKDYGNSPL						C1203	9	YAAGVHSVL						C1403	9
												C0304	9	YAYLYIRML																		C0802	9	TLDFENEKL						C1203	9	YAALHHRIL						C1403	9
												C0304	9	YAYPGVLLI																		C0802	9	TLDLPTAPL						C1203	9	YAANLKNVM						C1403	9
												C0304	9	YAYRDAVFL																		C0802	9	TLDLQNNDL						C1203	9	YAAPHFFHL						C1403	9
												C0304	9	YAYTGRLEL																		C0802	9	TLDLSHNSI						C1203	9	YAAPQLRSI						C1403	9
												C0304	9	YCIPVVQSL																		C0802	9	TLDQENQQL						C1203	9	YAAPWFLTL						C1403	9
												C0304	9	YCTEIFDYL																		C0802	9	TLDQTLNEL						C1203	9	YAAVKIHQL						C1403	9
												C0304	9	YGDLGGPII																		C0802	9	TLQHIVTLL						C1203	9	YAFAHILTV						C1403	9
												C0304	9	YGFQYPLAM																		C0802	9	TMDDLTTAL						C1203	9	YAFDFARQS						C1403	9
												C0304	9	YGIEHALAL																		C0802	9	TMDGANVEM						C1203	9	YAFDRVFQS						C1403	9
												C0304	9	YGINNIREL																		C0802	9	TMDIGRTVL						C1203	9	YAFGGGCEL						C1403	9
												C0304	9	YGITSPISL																		C0802	9	TQDAVPLTL						C1203	9	YAFGKFPTV						C1403	9
												C0304	9	YGLDLHPTI																		C0802	9	TQDELDQTL						C1203	9	YAFLRREYY						C1403	9
												C0304	9	YGNPNTLRL																		C0802	9	TQDELKEVF						C1203	9	YAFNGTQRF						C1403	9
												C0304	9	YGSFVTRAL																		C0802	9	TQDEVSQTL						C1203	9	YAFNMKATV						C1403	9
												C0304	9	YGSPGILEF																		C0802	9	TQDLPGVKL						C1203	9	YAFPKAVSV						C1403	9
												C0304	9	YGSPNALVL																		C0802	9	TQDLQAKEL						C1203	9	YAFPKAVTV						C1403	9
												C0304	9	YGVTVFKAL																		C0802	9	TQDLTVSQL						C1203	9	YAFPKEFPY						C1403	9
												C0304	9	YGYEHILTL																		C0802	9	TQDSSILPL						C1203	9	YAFPKSITV						C1403	9
												C0304	9	YGYSNPKIL																		C0802	9	TSDDVAKEF						C1203	9	YAFPLAHSL						C1403	9
												C0304	9	YIDDVFHAL																		C0802	9	TSDEQNHLV						C1203	9	YAFPRVRII						C1403	9
												C0304	9	YIDEGRLVL																		C0802	9	TSDGSPSPL						C1203	9	YAFPVSNNL						C1403	9
												C0304	9	YIIDPQNGL																		C0802	9	TSDIILVGL						C1203	9	YAFPYIILV						C1403	9
												C0304	9	YIIIPKSSL																		C0802	9	TSDIYFVSL						C1203	9	YAFSGVEEL						C1403	9
												C0304	9	YIIPVVLFL																		C0802	9	TSDKGFVTM						C1203	9	YAFVRPVIL						C1403	9
												C0304	9	YIIVPPLTL																		C0802	9	TSDKPHSAL						C1203	9	YAHFPINVV						C1403	9
												C0304	9	YILDPKQAL																		C0802	9	TSDLGKTEL						C1203	9	YAIDNPLHY						C1403	9
												C0304	9	YILGKFFAL																		C0802	9	TSDLIVLGL						C1203	9	YAIDSVLEV						C1403	9
												C0304	9	YILPFSEVL																		C0802	9	TSDLPSFEV						C1203	9	YAIEKVREI						C1403	9
												C0304	9	YILPWESEL																		C0802	9	TSDMGSYAL						C1203	9	YAIEVDPVL						C1403	9
												C0304	9	YIMDWMDEM																		C0802	9	TSDNPVVQL						C1203	9	YAIGLVMRL						C1403	9
												C0304	9	YINPRAVQL																		C0802	9	TSDPAAHAL						C1203	9	YAIHKIAKM						C1403	9
												C0304	9	YISAKPLEM																		C0802	9	TSDPALCTL						C1203	9	YAIPMLQLL						C1403	9
												C0304	9	YITAAYVEM																		C0802	9	TSDPALLSF						C1203	9	YAISMARKI						C1403	9
												C0304	9	YITDFLARL																		C0802	9	TSDPALNHV						C1203	9	YAITRVLRL						C1403	9
												C0304	9	YITDLFQVL																		C0802	9	TSDPAVQAI						C1203	9	YAKDMLTSL						C1403	9
												C0304	9	YITGHVLVV																		C0802	9	TSDPIGEVL						C1203	9	YAKEFLPFL						C1403	9
												C0304	9	YIVDHTIIM																		C0802	9	TSDVGATLL						C1203	9	YAKIHIPII						C1403	9
												C0304	9	YIVKWPLSL																		C0802	9	TSDVSQATL						C1203	9	YAKIVEIPF						C1403	9
												C0304	9	YIYPNIIAM																		C0802	9	TSSSPGSPI						C1203	9	YAKNNIPII						C1403	9
												C0304	9	YLADIFTKL																		C0802	9	TTDDKAVVL						C1203	9	YAKPYFLRL						C1403	9
												C0304	9	YLADVTNAL																		C0802	9	TTDDSICVL						C1203	9	YAKRPGIGL						C1403	9
												C0304	9	YLAPHVRTL																		C0802	9	TTDEPGLPF						C1203	9	YALNRITVW						C1403	9
												C0304	9	YLFERIKEL																		C0802	9	TTDPGASSL						C1203	9	YAMDIVKGL						C1403	9
												C0304	9	YLIARVMLL																		C0802	9	TTDSPTTKV						C1203	9	YAMRYFATV						C1403	9
												C0304	9	YLIEPDVEL																		C0802	9	TVDAPNFIV						C1203	9	YANYYTREV						C1403	9
												C0304	9	YLIGVHASL																		C0802	9	TVDDLVAEI						C1203	9	YAPECLKEY						C1403	9
												C0304	9	YLIPFSSKL																		C0802	9	TVDDPYATF						C1203	9	YAQLHSFTL						C1403	9
												C0304	9	YLLDHFLSM																		C0802	9	TVDGKTANI						C1203	9	YARQLEMIV						C1403	9
												C0304	9	YLLDLHSYL																		C0802	9	TVDGPRNEL						C1203	9	YASDFHNVL						C1403	9
												C0304	9	YLLEKSRAI																		C0802	9	TVDGPSGKL						C1203	9	YASNITSVL						C1403	9
												C0304	9	YLLEKSRIV																		C0802	9	TVDGSPHEL						C1203	9	YASPVVAFY						C1403	9
												C0304	9	YLLEKSRVI																		C0802	9	TVDTPHGIF						C1203	9	YASQQIRQI						C1403	9
												C0304	9	YLLESVNKL																		C0802	9	TWDELGEAL						C1203	9	YASQYIARY						C1403	9
												C0304	9	YLNETFSEL																		C0802	9	TWDERFSAL						C1203	9	YASRFVQLV						C1403	9
												C0304	9	YLNEWLQIL																		C0802	9	TYDLIKDAL						C1203	9	YASSKLLKI						C1403	9
												C0304	9	YLQDEFRIL																		C0802	9	VAAARAVPV						C1203	9	YASTIVSAL						C1403	9
												C0304	9	YLQIHPQEL																		C0802	9	VADAIRTSL						C1203	9	YATASLRKL						C1403	9
												C0304	9	YLTAEILEL																		C0802	9	VADAVTYQL						C1203	9	YATDLVVCV						C1403	9
												C0304	9	YLVPQARAL																		C0802	9	VADAWGVEL						C1203	9	YATEKLRMI						C1403	9
												C0304	9	YMDAPKAAL																		C0802	9	VADDPIVMV						C1203	9	YATFIVTNY						C1403	9
												C0304	9	YMIAHITGL																		C0802	9	VADDPNDPY						C1203	9	YATIILSKM						C1403	9
												C0304	9	YMLEHVITL																		C0802	9	VADDQKLMI						C1203	9	YATKHLRVL						C1403	9
												C0304	9	YMYQLFRSL																		C0802	9	VADDTPVLL						C1203	9	YATTVIPRV						C1403	9
												C0304	9	YNIDSHLLL																		C0802	9	VADDYIHTA						C1203	9	YAVDRAITH						C1403	9
												C0304	9	YQEKGVRVL																		C0802	9	VADEAGQRL						C1203	9	YAVNSQFTM						C1403	9
												C0304	9	YQEVGAKVL																		C0802	9	VADEDAHNI						C1203	9	YAYAAQNLL						C1403	9
												C0304	9	YQIAVTKVL																		C0802	9	VADEEIAAL						C1203	9	YAYDAKIEI						C1403	9
												C0304	9	YQIPTENSM																		C0802	9	VADEELVHL						C1203	9	YAYEKPHVV						C1403	9
												C0304	9	YQMEMMRSL																		C0802	9	VADEGICYL						C1203	9	YAYEWQRCL						C1403	9
												C0304	9	YQNPQITQL																		C0802	9	VADEISFRL						C1203	9	YAYLKAIVL						C1403	9
												C0304	9	YQQELEREL																		C0802	9	VADELLENL						C1203	9	YAYLYIRML						C1403	9
												C0304	9	YQVGVHYEL																		C0802	9	VADELVAEF						C1203	9	YAYPGVLLI						C1403	9
												C0304	9	YQYLLVTAL																		C0802	9	VADELVSEF						C1203	9	YAYPYSYYY						C1403	9
												C0304	9	YQYPRPLLI																		C0802	9	VADEMDVML						C1203	9	YAYRDAVFL						C1403	9
												C0304	9	YSADGHSIL																		C0802	9	VADENLKAF						C1203	9	YAYTAQLKA						C1403	9
												C0304	9	YSAEPLPEL																		C0802	9	VADEQNRAL						C1203	9	YAYTGRLEL						C1403	9
												C0304	9	YSAPVIHVL																		C0802	9	VADEQQRLM						C1203	9	YAYTSQIEI						C1403	9
												C0304	9	YSDDIPHAL																		C0802	9	VADEYIERL						C1203	9	YAYTSRVIL						C1403	9
												C0304	9	YSDDTLKQL																		C0802	9	VADFGLARL						C1203	9	YFHCTLIGY						C1403	9
												C0304	9	YSDFVVHEI																		C0802	9	VADFGLITM						C1203	9	YFVPLVKRL						C1403	9
												C0304	9	YSDPRFLNL																		C0802	9	VADFGLSRL						C1203	9	YGAEIVRRY						C1403	9
												C0304	9	YSDSFPMEL																		C0802	9	VADFGSATF						C1203	9	YGAEVISVL						C1403	9
												C0304	9	YSFDYPSDM																		C0802	9	VADFLQNIL						C1203	9	YGFLHVIVH						C1403	9
												C0304	9	YSFHKFHYL																		C0802	9	VADFQRYIL						C1203	9	YGIDTIRLY						C1403	9
												C0304	9	YSFYNQQTL																		C0802	9	VADFSATYL						C1203	9	YGLTFTEKW						C1403	9
												C0304	9	YSIAQFKYL																		C0802	9	VADFVRDSL						C1203	9	YGMERVWCV						C1403	9
												C0304	9	YSIGPNSKL																		C0802	9	VADGLITTL						C1203	9	YGSPNALVL						C1403	9
												C0304	9	YSINMNVFL																		C0802	9	VADGLPLAA						C1203	9	YGYDNVKEY						C1403	9
												C0304	9	YSIVGLSSL																		C0802	9	VADGLVTTL						C1203	9	YGYEHILTL						C1403	9
												C0304	9	YSIYVYKVL																		C0802	9	VADGYPVRL						C1203	9	YGYGIRYEY						C1403	9
												C0304	9	YSKLPGVSL																		C0802	9	VADHPFLFL						C1203	9	YGYNQRPPY						C1403	9
												C0304	9	YSLAAALTL																		C0802	9	VADHPGIDF						C1203	9	YGYSNPKIL						C1403	9
												C0304	9	YSLDHISSL																		C0802	9	VADIAVELL						C1203	9	YGYYRTVIF						C1403	9
												C0304	9	YSLPNAPTL																		C0802	9	VADIDGSTF						C1203	9	YIATIHSRL						C1403	9
												C0304	9	YSLQPPSAL																		C0802	9	VADIKASQI						C1203	9	YIFEEPFTI						C1403	9
												C0304	9	YSMPISIEF																		C0802	9	VADILAHEI						C1203	9	YIFTTPKSV						C1403	9
												C0304	9	YSMPSTHAM																		C0802	9	VADKDLLDL						C1203	9	YIIDTTGKL						C1403	9
												C0304	9	YSMPVHAAV																		C0802	9	VADKDTVLL						C1203	9	YIIKDKHIL						C1403	9
												C0304	9	YSQSPALEL																		C0802	9	VADLAESIM						C1203	9	YIKDFFEQM						C1403	9
												C0304	9	YSSPFDPVL																		C0802	9	VADLAFAHL						C1203	9	YIPDFLTLL						C1403	9
												C0304	9	YSTDENLIL																		C0802	9	VADLGAMVV						C1203	9	YITGHVLVV						C1403	9
												C0304	9	YSVPFYPTF																		C0802	9	VADLIESML						C1203	9	YIVDHTIIM						C1403	9
												C0304	9	YSVRVSPQM																		C0802	9	VADLIGLNL						C1203	9	YLADIFTKL						C1403	9
												C0304	9	YSVYVYKVL																		C0802	9	VADLQLIDF						C1203	9	YLADLYHFV						C1403	9
												C0304	9	YSWVGRPLL																		C0802	9	VADLQSINI						C1203	9	YLAPHVRTL						C1403	9
												C0304	9	YSYDLSHSL																		C0802	9	VADLREAIL						C1203	9	YLFEWRTQY						C1403	9
												C0304	9	YSYFSPRTM																		C0802	9	VADLSEQSL						C1203	9	YLIKYIAIV						C1403	9
												C0304	9	YTAFARLSL																		C0802	9	VADLTGELM						C1203	9	YLIPIVVRY						C1403	9
												C0304	9	YTFSEPFHL																		C0802	9	VADLVVNIL						C1203	9	YLITHPLAV						C1403	9
												C0304	9	YTIENPRHF																		C0802	9	VADMAAYQL						C1203	9	YLKDFFSNV						C1403	9
												C0304	9	YTIHFIEEM																		C0802	9	VADMVKQFF						C1203	9	YLKEFIHIL						C1403	9
												C0304	9	YTIMSPAVL																		C0802	9	VADNLAIQL						C1203	9	YLSMVFSIV						C1403	9
												C0304	9	YTIPAHQNL																		C0802	9	VADNRIQEL						C1203	9	YMISIVHIY						C1403	9
												C0304	9	YTIPLAIKL																		C0802	9	VADPETRTV						C1203	9	YMVTIVHIY						C1403	9
												C0304	9	YTIPLSPVL																		C0802	9	VADPGVTVA						C1203	9	YNFEKPVVM						C1403	9
												C0304	9	YTIPPGHQV																		C0802	9	VADPIIYVL						C1203	9	YNFEYSVVF						C1403	9
												C0304	9	YTLINHRVL																		C0802	9	VADPPIARL						C1203	9	YNYIRIMVM						C1403	9
												C0304	9	YTLLHNPTL																		C0802	9	VADPVEAVL						C1203	9	YQADIERMY						C1403	9
												C0304	9	YTMVYWHAL																		C0802	9	VADPYVVIM						C1203	9	YQFTGIKKY						C1403	9
												C0304	9	YTNPSGIVL																		C0802	9	VADQIVTKL						C1203	9	YQITSVIQY						C1403	9
												C0304	9	YTSEVQAIL																		C0802	9	VADRLGLEL						C1203	9	YQKPFQTLM						C1403	9
												C0304	9	YTSGTFRTV																		C0802	9	VADRLLVEL						C1203	9	YQTDLVNIM						C1403	9
												C0304	9	YTSPVNPAV																		C0802	9	VADRLMLEL						C1203	9	YQYPRPLLI						C1403	9
												C0304	9	YTTDFIFNL																		C0802	9	VADSHSSHF						C1203	9	YQYPVIIHL						C1403	9
												C0304	9	YTTDFIYQL																		C0802	9	VADSKTLLE						C1203	9	YSADGHSIL						C1403	9
												C0304	9	YTTDRVMTV																		C0802	9	VADSTPAHF						C1203	9	YSAPVIHVL						C1403	9
												C0304	9	YTVLTRIGL																		C0802	9	VADSVEKGL						C1203	9	YSFDYPSDM						C1403	9
												C0304	9	YTVPAGMTV																		C0802	9	VADTDQKAL						C1203	9	YSFGGCHRY						C1403	9
												C0304	9	YVAQAGLEL																		C0802	9	VADTFQDYF						C1203	9	YSFHKFHYL						C1403	9
												C0304	9	YVDPVNKVL																		C0802	9	VADTGLQIL						C1203	9	YSFYLPIAA						C1403	9
												C0304	9	YVENQFREF																		C0802	9	VADTVARVL						C1203	9	YSHPHVRLL						C1403	9
												C0304	9	YVFPGVTRL																		C0802	9	VADTVYRAL						C1203	9	YSINWTQKL						C1403	9
												C0304	9	YVHPFIFAL																		C0802	9	VADWVYNEL						C1203	9	YSISERLEM						C1403	9
												C0304	9	YVIAYIRDL																		C0802	9	VADYEATTF						C1203	9	YSKEGWEYV						C1403	9
												C0304	9	YVIDPIKGL																		C0802	9	VAEAPGGEL						C1203	9	YSKLPGVSL						C1403	9
												C0304	9	YVINVTTHL																		C0802	9	VAEEAKQAL						C1203	9	YSLEHTVQF						C1403	9
												C0304	9	YVIPDWKVV																		C0802	9	VAEENTRVL						C1203	9	YSMYREFWA						C1403	9
												C0304	9	YVIQKFFEF																		C0802	9	VAEERGAVL						C1203	9	YSSGLVRLY						C1403	9
												C0304	9	YVLEHNLHL																		C0802	9	VAEEVNAIL						C1203	9	YSSPEILRV						C1403	9
												C0304	9	YVNLPTIAL																		C0802	9	VAEGPGAEL						C1203	9	YSSPLFRSL						C1403	9
												C0304	9	YVPDTTISL																		C0802	9	VAEHHVATL						C1203	9	YSVPFYPTF						C1403	9
												C0304	9	YVQDPFAAL																		C0802	9	VAEISSNSL						C1203	9	YSYFSPRTM						C1403	9
												C0304	9	YVQIPGMEI																		C0802	9	VAEITNACF						C1203	9	YSYIDAVCY						C1403	9
												C0304	9	YVSPRILTA																		C0802	9	VAEKHGLTL						C1203	9	YSYNIRHSF						C1403	9
												C0304	9	YVTSVILHI																		C0802	9	VAELPTPEL						C1203	9	YSYPELVKM						C1403	9
												C0304	9	YVVDDAAVL																		C0802	9	VAELSSPDL						C1203	9	YSYPETPLY						C1403	9
												C0304	9	YVVPGETAL																		C0802	9	VAEPMHGSL						C1203	9	YSYPSPITA						C1403	9
												C0304	9	YVVPYMIHL																		C0802	9	VAEQPPLKL						C1203	9	YTFGRIVIY						C1403	9
												C0304	9	YVVPYTIHL																		C0802	9	VAEQYSEKL						C1203	9	YTFNKVLML						C1403	9
												C0304	9	YVYERMTGL																		C0802	9	VAESAVSKL						C1203	9	YTFPAGVSV						C1403	9
												C0304	9	YVYSGVETL																		C0802	9	VAESGLPAL						C1203	9	YTFPFQQLM						C1403	9
												C0304	9	YVYSHFLQF																		C0802	9	VAETHIVLL						C1203	9	YTFSEPFHL						C1403	9
												C0304	9	YYVDFFKTL																		C0802	9	VASEVSTSL						C1203	9	YTHEVVTLW						C1403	9
																																C0802	9	VAVEPGAAV						C1203	9	YTIEFLRHL						C1403	9
																																C0802	9	VDEASKKEI						C1203	9	YTIENPRHF						C1403	9
																																C0802	9	VFDARELEL						C1203	9	YTIGGVKIY						C1403	9
																																C0802	9	VFDVSHNAV						C1203	9	YTIPLAIKL						C1403	9
																																C0802	9	VFDYSINSV						C1203	9	YTKNYLPLL						C1403	9
																																C0802	9	VGDEAFREL						C1203	9	YTMPNFRQY						C1403	9
																																C0802	9	VGDGIGMDL						C1203	9	YTPDWIFLL						C1403	9
																																C0802	9	VGDIPGVRF						C1203	9	YTSGDVRVW						C1403	9
																																C0802	9	VGDLLEVSL						C1203	9	YTSPDFLYV						C1403	9
																																C0802	9	VGDPAGNEL						C1203	9	YTTDFIYQL						C1403	9
																																C0802	9	VGDPGQRTL						C1203	9	YTTDRVMTV						C1403	9
																																C0802	9	VGDPHTVTV						C1203	9	YTYEKLLWT						C1403	9
																																C0802	9	VGDPSTTNL						C1203	9	YTYLRINFY						C1403	9
																																C0802	9	VGDTQVVVF						C1203	9	YTYPWVYNY						C1403	9
																																C0802	9	VGDVPILQL						C1203	9	YTYYYPHYL						C1403	9
																																C0802	9	VIDAVTHAL						C1203	9	YVAELIQQL						C1403	9
																																C0802	9	VIDDDVEEI						C1203	9	YVFPGVTRL						C1403	9
																																C0802	9	VIDDLVYSI						C1203	9	YVGPAKVIV						C1403	9
																																C0802	9	VIDDRAARL						C1203	9	YVIELQHVV						C1403	9
																																C0802	9	VIDFTGHAL						C1203	9	YVLAFWALL
																																C0802	9	VIDGEFKEL						C1203	9	YVPDIVRCV
																																C0802	9	VIDGNVMAI						C1203	9	YVSPRILTA
																																C0802	9	VIDGSNVAM						C1203	9	YVTSLLKMY
																																C0802	9	VIDHHNYDI						C1203	9	YVTTSTRTY
																																C0802	9	VIDLETTSL						C1203	9	YVVPFVAKV
																																C0802	9	VIDNFTSQL						C1203	9	YVYEYLLHI
																																C0802	9	VIDPVPAAV						C1203	9	YVYEYLLHV
																																C0802	9	VIDQIAETL						C1203	9	YVYMFLVKW
																																C0802	9	VIDTPVFEL						C1203	9	YVYPKYLKY
																																C0802	9	VIEEQVAAL						C1203	9	YWIHWVRQM
																																C0802	9	VISDKDLEL
																																C0802	9	VISLEGKPL
																																C0802	9	VISQQSLEL
																																C0802	9	VKDVPNSQL
																																C0802	9	VLACNFSVI
																																C0802	9	VLDDSTAKL
																																C0802	9	VLDEADEML
																																C0802	9	VLDEAGSTV
																																C0802	9	VLDEFYSSL
																																C0802	9	VLDEIGIEI
																																C0802	9	VLDELGLSL
																																C0802	9	VLDEPGQDL
																																C0802	9	VLDEVVTVL
																																C0802	9	VLDFDPMAV
																																C0802	9	VLDGSGHIL
																																C0802	9	VLDLQEVTL
																																C0802	9	VLDLQHNAL
																																C0802	9	VLDLTYNNL
																																C0802	9	VLDNPTPEM
																																C0802	9	VLDSDSGLL
																																C0802	9	VLDSEGSFL
																																C0802	9	VLDVQRYPL
																																C0802	9	VLDVVERSL
																																C0802	9	VMDEIHTVL
																																C0802	9	VMDLSIVRL
																																C0802	9	VNDQPSGNL
																																C0802	9	VQDELHSVL
																																C0802	9	VQDESHSEW
																																C0802	9	VQDGATHSL
																																C0802	9	VQDILRTEL
																																C0802	9	VQDKGNAAL
																																C0802	9	VQDLIEGHL
																																C0802	9	VQDLKCLVF
																																C0802	9	VQDLLLLDV
																																C0802	9	VQDLMETDL
																																C0802	9	VQDRPESSL
																																C0802	9	VSDCQRIEL
																																C0802	9	VSDDGTLHM
																																C0802	9	VSDDPRCRL
																																C0802	9	VSDDTVMHL
																																C0802	9	VSDEDFSAL
																																C0802	9	VSDEEMMEL
																																C0802	9	VSDEMVVEL
																																C0802	9	VSDEQVLVL
																																C0802	9	VSDESSQYL
																																C0802	9	VSDEVGFGL
																																C0802	9	VSDFETKSL
																																C0802	9	VSDFGGRSL
																																C0802	9	VSDFGQSHL
																																C0802	9	VSDGVPLVL
																																C0802	9	VSDHFPVEF
																																C0802	9	VSDIGSQEL
																																C0802	9	VSDLGPVVL
																																C0802	9	VSDLNATEI
																																C0802	9	VSDLQHVTL
																																C0802	9	VSDLSQVTV
																																C0802	9	VSDPEEMEL
																																C0802	9	VSDPGVGSI
																																C0802	9	VSDPNLIHV
																																C0802	9	VSDPVTVHF
																																C0802	9	VSDQANHVL
																																C0802	9	VSDRKNIDL
																																C0802	9	VSDSALQEL
																																C0802	9	VSDSGAHVL
																																C0802	9	VSDSGVIAL
																																C0802	9	VSDSVTPVL
																																C0802	9	VSDTPSITA
																																C0802	9	VSDVLGVAV
																																C0802	9	VSDVPSLSV
																																C0802	9	VSDVVKVDL
																																C0802	9	VSDYTPLSL
																																C0802	9	VSELITKAV
																																C0802	9	VTDAAFNFL
																																C0802	9	VTDADRSIL
																																C0802	9	VTDDPTQVH
																																C0802	9	VTDENGNRL
																																C0802	9	VTDGALVVV
																																C0802	9	VTDHATTAL
																																C0802	9	VTDHNLHEL
																																C0802	9	VTDKSGISM
																																C0802	9	VTDLGTAEL
																																C0802	9	VTDLNSLEL
																																C0802	9	VTDSGRTVI
																																C0802	9	VTDTDILAL
																																C0802	9	VTDTGALYL
																																C0802	9	VTDTGCEIL
																																C0802	9	VTDVTSNLL
																																C0802	9	VTENPGKSI
																																C0802	9	VTEPDHPVL
																																C0802	9	VVDAGKVTL
																																C0802	9	VVDAPPLDL
																																C0802	9	VVDDIVSKL
																																C0802	9	VVDEKISAM
																																C0802	9	VVDETGNVL
																																C0802	9	VVDFVAATL
																																C0802	9	VVDGAFSYL
																																C0802	9	VVDGGAIPA
																																C0802	9	VVDGTPLVA
																																C0802	9	VVDKCDEPL
																																C0802	9	VVDKCTEVL
																																C0802	9	VVDKPEQTV
																																C0802	9	VVDKPPSTM
																																C0802	9	VVDLAPLHL
																																C0802	9	VVDLDTSQL
																																C0802	9	VVDLGGLSI
																																C0802	9	VVDLLQQEL
																																C0802	9	VVDNQTEKL
																																C0802	9	VVDQGSTNL
																																C0802	9	VVDSEDIPL
																																C0802	9	VVDSEVPSL
																																C0802	9	VVDSIMTAL
																																C0802	9	VVDSSNTAL
																																C0802	9	VVDVTSLSL
																																C0802	9	VVDYPNSAK
																																C0802	9	VVEPYNATL
																																C0802	9	VVEVPSAVL
																																C0802	9	VWDIVGTEL
																																C0802	9	VWDVIGRSL
																																C0802	9	WTDFPGRVL
																																C0802	9	YADDNSLLF
																																C0802	9	YADEKGLEA
																																C0802	9	YADFAPSLL
																																C0802	9	YADFGPLNL
																																C0802	9	YADFPELDL
																																C0802	9	YADGGGCKL
																																C0802	9	YADHPFIFL
																																C0802	9	YADIEAAWL
																																C0802	9	YADIFPSKV
																																C0802	9	YADIGGMDI
																																C0802	9	YADIVQLLL
																																C0802	9	YADPVADLL
																																C0802	9	YADPVTDLL
																																C0802	9	YADQHSVQV
																																C0802	9	YADQLKEYL
																																C0802	9	YADTQEINL
																																C0802	9	YADTVTTVI
																																C0802	9	YADVGGKQF
																																C0802	9	YADVQKDGV
																																C0802	9	YADYIGFIL
																																C0802	9	YAEEFRTYL
																																C0802	9	YAEIPDETL
																																C0802	9	YAEQLHVQL
																																C0802	9	YAEQLVVEL
																																C0802	9	YAEVGRVLL
																																C0802	9	YAEYMPIKL
																																C0802	9	YCDERITEL
																																C0802	9	YFDAIPVTM
																																C0802	9	YFDDSNVSL
																																C0802	9	YFDLQTHVI
																																C0802	9	YGDEIAIEL
																																C0802	9	YGDESTLAF
																																C0802	9	YGDKIIEEL
																																C0802	9	YGDKQSNAL
																																C0802	9	YGDLGGPII
																																C0802	9	YGDPYYSYL
																																C0802	9	YIDDVFHAL
																																C0802	9	YIDEGRLVL
																																C0802	9	YIDLPPPRL
																																C0802	9	YIDQDMQVL
																																C0802	9	YIDQGIAEL
																																C0802	9	YIDRDSEYL
																																C0802	9	YIDYEFSVL
																																C0802	9	YIEDQKLVL
																																C0802	9	YLDGVGDTL
																																C0802	9	YLDGVHTVF
																																C0802	9	YLDLPSVTI
																																C0802	9	YLDLSNNRL
																																C0802	9	YLDPVQRDL
																																C0802	9	YLDWDVSEL
																																C0802	9	YLEDSPLEL
																																C0802	9	YLEEPLTQV
																																C0802	9	YLENEPLML
																																C0802	9	YMDAPKAAL
																																C0802	9	YNDDKNTYI
																																C0802	9	YNDFINKEL
																																C0802	9	YQDLLNVKM
																																C0802	9	YQDPDATSL
																																C0802	9	YQDQEQRIL
																																C0802	9	YQDTHPERL
																																C0802	9	YQDVGSLNI
																																C0802	9	YSCDHNTSL
[truncated: 57 more rows]
[truncated: 4 more columns]

## Sheet: C2 peptides
Allele	Length	Peptide		Allele	Length	Peptide		Allele	Length	Peptide		Allele	Length	Peptide		Allele	Length	Peptide		Allele	Length	Peptide		Allele	Length	Peptide
C0202	9	AAAALPTLY		C0401	9	AAPIRLLAA		C0403	9	AADEPVTVL		C0501	9	AACGGHVEL		C0602	9	AAAEITRKL		C1502	9	AAAAPHLLL		C1701	9	AAAAAIVFL
C0202	9	AAAALYQQL		C0401	9	AFADSSYLL		C0403	9	AADFEIGHF		C0501	9	AADAEPLEI		C0602	9	AAALIIHHV		C1502	9	AAAIKALEL		C1701	9	AAAAGMLLL
C0202	9	AAADIFKHY		C0401	9	AFDASRTSF		C0403	9	AADHWAWLL		C0501	9	AADAGFALF		C0602	9	AAANVVRNI		C1502	9	AAAPHLLLL		C1701	9	AAAASYPAL
C0202	9	AAAGGLHEF		C0401	9	AFDCMKNYL		C0403	9	AADLLVVHL		C0501	9	AADAKPESL		C0602	9	AAASLIRLV		C1502	9	AAAPQLLIV		C1701	9	AAADIVNFL
C0202	9	AAAGLHSNV		C0401	9	AFDDAIAEL		C0403	9	AADLPARGF		C0501	9	AADDHTVKL		C0602	9	AAFAYTVKY		C1502	9	AAASHPLLL		C1701	9	AAADSAVRL
C0202	9	AAAGVFALL		C0401	9	AFDDVVKYF		C0403	9	AADLSEIEI		C0501	9	AADDIHRSL		C0602	9	AAFLLVRKL		C1502	9	AAEFHARFV		C1701	9	AAAERPPRL
C0202	9	AAAPAGTTF		C0401	9	AFDEAIAEL		C0403	9	AADPLASKL		C0501	9	AADDKEACF		C0602	9	AAFPGASLY		C1502	9	AAFEKALEV		C1701	9	AAAGAPALL
C0202	9	AAAPHTVSY		C0401	9	AFDEKLFTF		C0403	9	AADPRVACL		C0501	9	AADDRLRIS		C0602	9	AAFPRLRTI		C1502	9	AAIASLLYL		C1701	9	AAAGSPLSL
C0202	9	AAAPIISSV		C0401	9	AFDEYGRPF		C0403	9	AADPSVVNL		C0501	9	AADDRTVRI		C0602	9	AAFREPRLL		C1502	9	AAIDHQIEV		C1701	9	AAAGSPVFL
C0202	9	AAAPVIKAY		C0401	9	AFDFAAREM		C0403	9	AADPVSPLL		C0501	9	AADDSKLVL		C0602	9	AAGPIRVVL		C1502	9	AAIMQALWL		C1701	9	AAAPHLLLL
C0202	9	AAASKLGEF		C0401	9	AFDFQDVTL		C0403	9	AADSAVRLW		C0501	9	AADDSSVKL		C0602	9	AAIGLVIYY		C1502	9	AAIPYWLLL		C1701	9	AAAPSLLIL
C0202	9	AAATRTTSF		C0401	9	AFDHMKVCF		C0403	9	AADTLVTKF		C0501	9	AADDTEISF		C0602	9	AAIKIIRQL		C1502	9	AAISEVLYV		C1701	9	AAAPTANLL
C0202	9	AAAVPRAAF		C0401	9	AFDIAEELV		C0403	9	AADTVVIFD		C0501	9	AADEITHCI		C0602	9	AAKDLISKL		C1502	9	AAIWFRTYL		C1701	9	AAAQEPLQL
C0202	9	AACDLVQRF		C0401	9	AFDIAEKEL		C0403	9	AAEFVPSFL		C0501	9	AADEKSVSI		C0602	9	AALGPIREL		C1502	9	AALMRPLVV		C1701	9	AAASHPLLL
C0202	9	AADPQIRQF		C0401	9	AFDISKKEM		C0403	9	AAEYPAVKF		C0501	9	AADEPVTVL		C0602	9	AAMSLLRRV		C1502	9	AALPVYQEL		C1701	9	AAASKVLNL
C0202	9	AAFAYTVKY		C0401	9	AFDITYVRL		C0403	9	AAPDDLALL		C0501	9	AADEVLAVL		C0602	9	AASPIITLV		C1502	9	AAMSHLLEM		C1701	9	AAASQFTLL
C0202	9	AAFCKLIVY		C0401	9	AFDKPKVEL		C0403	9	AFADSSYLL		C0501	9	AADEVTAHL		C0602	9	AASSIQRVL		C1502	9	AAMSLLRRV		C1701	9	AAATLTSKL
C0202	9	AAFDHICTF		C0401	9	AFDLDVVKL		C0403	9	AFDCMKNYL		C0501	9	AADFAQMEL		C0602	9	AAYFTHSNL		C1502	9	AANKTIIYL		C1701	9	AAATSALLL
C0202	9	AAFGRDLFL		C0401	9	AFDLIEHYF		C0403	9	AFDDAIAEL		C0501	9	AADFEIGHF		C0602	9	AAYGYGIRY		C1502	9	AANKVVLQL		C1701	9	AAAVQAFYL
C0202	9	AAFLKAIGY		C0401	9	AFDLKAAVL		C0403	9	AFDEAIAEL		C0501	9	AADGGPKLV		C0602	9	AAYQSVRIL		C1502	9	AANRLTLEL		C1701	9	AACGGHVEL
C0202	9	AAFPGASLY		C0401	9	AFDLSQVLF		C0403	9	AFDLIEHYF		C0501	9	AADGKGVVV		C0602	9	AAYTEIRAL		C1502	9	AAQVHVLML		C1701	9	AACRVIARL
C0202	9	AAFPKKLAF		C0401	9	AFDLTEQRY		C0403	9	AFDLSQVLF		C0501	9	AADGKLLKL		C0602	9	AAYYLPRHL		C1502	9	AASAFFTYV		C1701	9	AACSFFILL
C0202	9	AAFTRALEY		C0401	9	AFDLTKTNM		C0403	9	AFDLTEQRY		C0501	9	AADGPQKLL		C0602	9	AERTLGNIL		C1502	9	AASAQLLRL		C1701	9	AADPSVVNL
C0202	9	AAGPTGMFF		C0401	9	AFDLVNIHL		C0403	9	AFDLTKTNM		C0501	9	AADGSVKLW		C0602	9	AGSSVLREL		C1502	9	AASGLPLMV		C1701	9	AADPVSPLL
C0202	9	AAHTVTAAY		C0401	9	AFDLYEQRY		C0403	9	AFDNVLNYI		C0501	9	AADGVLSEV		C0602	9	AGYNRVRIV		C1502	9	AASPIITLV		C1701	9	AAFGRDLFL
C0202	9	AAIDHQIEV		C0401	9	AFDNMVTSM		C0403	9	AFDPAAAAF		C0501	9	AADHTGPKF		C0602	9	AGYPHIRYI		C1502	9	AASTAQLLV		C1701	9	AAFPSSLRL
C0202	9	AAIGLVIYY		C0401	9	AFDNVLNYI		C0403	9	AFDPTSTLL		C0501	9	AADHTVYKL		C0602	9	AIPAFISLL		C1502	9	AATARVLVI		C1701	9	AAFSLTSHL
C0202	9	AAIKQAAGF		C0401	9	AFDPAAAAF		C0403	9	AFDPVLNRW		C0501	9	AADIENRVL		C0602	9	AIVDFVRWL		C1502	9	AATLYSLKV		C1701	9	AAGSHVIIL
C0202	9	AAINFQPKM		C0401	9	AFDPELRIM		C0403	9	AFDVHLNAF		C0501	9	AADKAIEKM		C0602	9	AKIKWVISV		C1502	9	AATSRIAEL		C1701	9	AAIAPPTSL
C0202	9	AAIYHVLHF		C0401	9	AFDPTSTLL		C0403	9	AFDVVERSF		C0501	9	AADKGHYKF		C0602	9	AKPPVVQHF		C1502	9	AAVGHVLVV		C1701	9	AAIASLLYL
C0202	9	AAKAAGVSF		C0401	9	AFDPVLNRW		C0403	9	AIDSPVSFL		C0501	9	AADKIHSSF		C0602	9	AKVDHVQMI		C1502	9	AAVHIILVI		C1701	9	AAIGEATRL
C0202	9	AAKAALEEF		C0401	9	AFDRKVQFL		C0403	9	AIPAFISLL		C0501	9	AADKRLTVL		C0602	9	ALPDLTKVI		C1502	9	AAYQSVRIL		C1701	9	AAIMQALWL
C0202	9	AAKCALAYF		C0401	9	AFDSSSAVF		C0403	9	ASDIPGLHL		C0501	9	AADKRPPKF		C0602	9	ALPLLVRVI		C1502	9	AAYRRALEL		C1701	9	AAINRQINL
C0202	9	AAKDKLSEL		C0401	9	AFDSTLTHL		C0403	9	ASDPYQVHV		C0501	9	AADLGSPSL		C0602	9	ALPPKPRFL		C1502	9	AAYYHPSYL		C1701	9	AAINRYSRL
C0202	9	AAKDKLTEL		C0401	9	AFDVAEREF		C0403	9	ATDEFASYF		C0501	9	AADLPARGF		C0602	9	ALRRLLLLL		C1502	9	AGDPVILYV		C1701	9	AAIPPDYLL
C0202	9	AAKDLISKL		C0401	9	AFDVHLNAF		C0403	9	ATDLRPIYI		C0501	9	AADLSLHSF		C0602	9	ALYPNVVQV		C1502	9	AGMPITLTV		C1701	9	AAIQGATLL
C0202	9	AAKDYNQKL		C0401	9	AFDVVERSF		C0403	9	ATDPFASVF		C0501	9	AADPEAPEI		C0602	9	AMAPIKVRL		C1502	9	AGNGIRVFV		C1701	9	AAIQQRTLL
C0202	9	AAKFKTPEL		C0401	9	AFDYAYVVL		C0403	9	ATDPGRLLL		C0501	9	AADPIITRW		C0602	9	AMAPLVRKI		C1502	9	AGSIVRLYV		C1701	9	AAIWFRTYL
C0202	9	AAKLEPKSF		C0401	9	AFEDDAIQL		C0403	9	ATDPNILSL		C0501	9	AADPLASKL		C0602	9	AMASIINRL		C1502	9	AGYNRVKIV		C1701	9	AAIYLVTSL
C0202	9	AAKPHNPGF		C0401	9	AFEDVAVNF		C0403	9	ATDVRRVWL		C0501	9	AADPSVVNL		C0602	9	AQFEHTILL		C1502	9	AGYPHIRYI		C1701	9	AALDKATVL
C0202	9	AAKQINIDF		C0401	9	AFEDVAVYF		C0403	9	ATDVWAVYF		C0501	9	AADPVSPLL		C0602	9	ARADFQKVL		C1502	9	AIIALFHLL		C1701	9	AALPKATIL
C0202	9	AAMPRPVSY		C0401	9	AFELHGVFL		C0403	9	AVDAVIAEL		C0501	9	AADQAKQLL		C0602	9	ARAELEMRL		C1502	9	AIILHLLYL		C1701	9	AALPRLIYL
C0202	9	AAMSHLLEM		C0401	9	AFEQLVVEL		C0403	9	AVDFESNNI		C0501	9	AADRCGAAL		C0602	9	ARAFFPNMV		C1502	9	AIMAIFRYV		C1701	9	AALPVYQEL
C0202	9	AAMSVAKRV		C0401	9	AFESEPLFL		C0403	9	AVEEYVYEF		C0501	9	AADRPGVSL		C0602	9	ARAFIILSV		C1502	9	AIMDIVIKV		C1701	9	AALRLLTYL
C0202	9	AAMSVAQRV		C0401	9	AFGLHLIDF		C0403	9	AVPEVAVYL		C0501	9	AADSAVRLW		C0602	9	ARAPISNYI		C1502	9	AIMDLLLRL		C1701	9	AALSQVTLL
C0202	9	AANPHSFVF		C0401	9	AFIEPPERM		C0403	9	AYDASLAML		C0501	9	AADSPGSGL		C0602	9	ARAWALFWL		C1502	9	AINIMVLKV		C1701	9	AANKTIIYL
C0202	9	AANPISGHY		C0401	9	AFLESVKKL		C0403	9	CADPRVPWV		C0501	9	AADSPSQNL		C0602	9	ARAYEPQEL		C1502	9	AINNAITYL		C1701	9	AAQTKATFL
C0202	9	AAQDRDQIY		C0401	9	AFSLAEAKF		C0403	9	CSDFVVVQF		C0501	9	AADTLVTKF		C0602	9	ARFEREQLL		C1502	9	AINPELLQL		C1701	9	AASAQLLRL
C0202	9	AAQEAVKLY		C0401	9	AFTSDPALL		C0403	9	CSDGKVLLF		C0501	9	AAEAAAAVV		C0602	9	ARFGLIQSM		C1502	9	AINPKLLQL		C1701	9	AASPQAPTL
C0202	9	AAQFIPKFF		C0401	9	AHDVDPIEL		C0403	9	DFDVAVVTF		C0501	9	AAEAAEVIL		C0602	9	ARFGSVNEL		C1502	9	AINPKLMQL		C1701	9	AASPSELHL
C0202	9	AARPATSTL		C0401	9	ALDKATVLL		C0403	9	DLPNGRVCP		C0501	9	AAEATPVAL		C0602	9	ARFNDLRFV		C1502	9	AIQDHLLEV		C1701	9	AASSSVCKL
C0202	9	AARSGPLAM		C0401	9	ALDVMVSTF		C0403	9	ETDPGMVHL		C0501	9	AAEDKSWRV		C0602	9	ARFPGNLLL		C1502	9	AISSVRLYI		C1701	9	AASTLVTWL
C0202	9	AARVIIEKY		C0401	9	AMDLVKNHL		C0403	9	FADAASLLL		C0501	9	AAEEANAVL		C0602	9	ARFPMPRYI		C1502	9	AITDHYIQV		C1701	9	AATAQVSHL
C0202	9	AASAIYSGY		C0401	9	AMPGVPAFL		C0403	9	FADAGLVCI		C0501	9	AAEEPLSLL		C0602	9	ARFSGNLLV		C1502	9	AITSYLLQL		C1701	9	AATDIFSYL
C0202	9	AASGHFICV		C0401	9	ATDEFASYF		C0403	9	FADAVQELL		C0501	9	AAEEPNAAV		C0602	9	ARFYAVQKL		C1502	9	AIVKVFLAL		C1701	9	AATDITSSL
C0202	9	AASPIITLV		C0401	9	ATDPFASVF		C0403	9	FADELSHLL		C0501	9	AAEEPVSEV		C0602	9	ARFYLPILV		C1502	9	AIYYFKIAV		C1701	9	AATEREISL
C0202	9	AASQINRAY		C0401	9	AVDAVIAEL		C0403	9	FADFEKIFV		C0501	9	AAEEREASL		C0602	9	ARHSLLQTL		C1502	9	ALFQQKLQL		C1701	9	AATHLTSKL
C0202	9	AASSIYSMY		C0401	9	AVDPLLALL		C0403	9	FADFLQAHL		C0501	9	AAEFVPSFL		C0602	9	ARIGGVRML		C1502	9	ALLPYFVYV		C1701	9	AATHRVVEL
C0202	9	AASYIQSKF		C0401	9	AWDEADVRF		C0403	9	FADFLVYEF		C0501	9	AAEKGDVGL		C0602	9	ARKDNVIRL		C1502	9	ALNAVRLLV		C1701	9	AATKILTEL
C0202	9	AATDIARQV		C0401	9	AWDEVGDEF		C0403	9	FADGHVLEL		C0501	9	AAEKKVVKI		C0602	9	ARKEIADYL		C1502	9	ALNEVHLVV		C1701	9	AATKVTTVL
C0202	9	AATEIVERV		C0401	9	AWDIAIATM		C0403	9	FADGKVYAL		C0501	9	AAEKSITIL		C0602	9	ARLDLERKV		C1502	9	ALNILKLVV		C1701	9	AATSLITTL
C0202	9	AATPAVRTV		C0401	9	AWDKEPVLV		C0403	9	FADGVILLL		C0501	9	AAEPHVVTV		C0602	9	ARLQTALLV		C1502	9	ALNSKILSV		C1701	9	AATSRIAEL
C0202	9	AAVGHVLVV		C0401	9	AWDLYYHVF		C0403	9	FADHVSSSL		C0501	9	AAEPTPTQV		C0602	9	ARNDYLLTL		C1502	9	ALNYLQLLV		C1701	9	AATVTITHL
C0202	9	AAVPEVAVY		C0401	9	AWDYVQAQV		C0403	9	FADIALAPM		C0501	9	AAEQKVTRL		C0602	9	ARNFYENLI		C1502	9	AMNSQILEV		C1701	9	AAVAPVLSI
C0202	9	AAVSFISKF		C0401	9	AWEERETIL		C0403	9	FADLNLAEF		C0501	9	AAEVAATEI		C0602	9	ARNTVTQVL		C1502	9	AMYVQLIEV		C1701	9	AAVDRTTEL
C0202	9	AAYGYGIRY		C0401	9	AWWEWDTKF		C0403	9	FADNDVSRF		C0501	9	AAEYPAVKF		C0602	9	ARPGFEQAI		C1502	9	ANAASPLIV		C1701	9	AAVFGVTRL
C0202	9	AAYGYKITE		C0401	9	AYDASLAML		C0403	9	FADQAEILL		C0501	9	AAISQVDRL		C0602	9	ARPGLGQYL		C1502	9	ANDIARLMV		C1701	9	AAVGEPAFL
C0202	9	AAYKWLVCY		C0401	9	AYDDKIYYF		C0403	9	FADREVQLL		C0501	9	AGDDAPRAV		C0602	9	ARPHFMSQF		C1502	9	ANGIKVLLI		C1701	9	AAVGFLSSL
C0202	9	AAYPEIVAV		C0401	9	AYDDLSPLL		C0403	9	FADVAPLQL		C0501	9	AGDEGRVLL		C0602	9	ARPMRAIFL		C1502	9	ANLEHAFYV		C1701	9	AAVGFPTHL
C0202	9	AAYPQVRCY		C0401	9	AYDFLYNYL		C0403	9	FADYPCHTV		C0501	9	AGDGEVTKI		C0602	9	ARPPFVICV		C1502	9	ANLGKFLEL		C1701	9	AAVHGTTKL
C0202	9	AAYQLAFRY		C0401	9	AYDHSYVEL		C0403	9	FADYRPTEV		C0501	9	AGDGGRVAL		C0602	9	ARQSIIRKV		C1502	9	ANLPFPLAL		C1701	9	AAVNHISQL
C0202	9	AAYYHPSYL		C0401	9	AYDKAVASF		C0403	9	FAIPLIEKL		C0501	9	AGDGPPRSF		C0602	9	ARSELYLRF		C1502	9	ANLYVGLVV		C1701	9	AAVPRAAFL
C0202	9	AFLILPELR		C0401	9	AYDLAKALL		C0403	9	FALPYVDHF		C0501	9	AGDKPRTFL		C0602	9	ARTDIVSWF		C1502	9	ANQAFFLLV		C1701	9	AAVRETVML
C0202	9	AGIGRTGTF		C0401	9	AYDPTAPTL		C0403	9	FAPEDPCFF		C0501	9	AGDSPGSQF		C0602	9	ARVERVIVV		C1502	9	ANQQNILKF		C1701	9	AAVRKPIVL
C0202	9	AIIDILTHY		C0401	9	AYDPYLIAM		C0403	9	FEDEKPALL		C0501	9	AGDTTNFHF		C0602	9	ARVPHSLDL		C1502	9	ANSDHLMQI		C1701	9	AAVSLITCL
C0202	9	AIIERTASF		C0401	9	AYDTLPVLI		C0403	9	FFDAIFTQL		C0501	9	AGDWRPSSI		C0602	9	ARWQQVWLL		C1502	9	ANSGAIVKL		C1701	9	AAYAGGLVL
C0202	9	AIIERVQRY		C0401	9	AYDVSSFSF		C0403	9	FFDAQEVLL		C0501	9	AIDRAGAEV		C0602	9	ARYGHELLI		C1502	9	ANSPWVVQL		C1701	9	AAYALVSNL
C0202	9	AIVEIFSKY		C0401	9	AYDYMCMGF		C0403	9	FFDDCIEKL		C0501	9	AIDSPVSFL		C0602	9	ARYHLVQQL		C1502	9	ANSPYIPYL		C1701	9	AAYCTGLLL
C0202	9	APASGVVPF		C0401	9	AYEPLASFL		C0403	9	FFDEKLNSL		C0501	9	AKDEPDTNL		C0602	9	ARYLTVPEI		C1502	9	ANTALPLAL		C1701	9	AAYDRYLKL
C0202	9	AQAQLQKRY		C0401	9	CADPRVPWV		C0403	9	FFDEVVKQM		C0501	9	AKEIDVSFV		C0602	9	ARYNFIRSM		C1502	9	ANTGIILFI		C1701	9	AAYGHRLCL
C0202	9	AQGPTPRYF		C0401	9	CFDPKELRI		C0403	9	FFDNISSEL		C0501	9	ALDEAAAAL		C0602	9	ARYPDTIAL		C1502	9	ANTLVYHVV		C1701	9	AAYGNRQNL
C0202	9	AQISWVTVF		C0401	9	CFDPLLYFF		C0403	9	FFDPHQSTF		C0501	9	ALDEPTTNL		C0602	9	ARYPNGVVV		C1502	9	ANTQVVREV		C1701	9	AAYHLIIEL
C0202	9	AQKNHIPVF		C0401	9	CFDQFVYKL		C0403	9	FFDPSLLHL		C0501	9	ALDGDAVVL		C0602	9	ASGPIRPIV		C1502	9	ANVEHILKI		C1701	9	AAYLRALSL
C0202	9	AQVWMITRY		C0401	9	CFDTVTKEL		C0403	9	FFDSVQVVF		C0501	9	ALDKATVLL		C0602	9	ASLDWPRMV		C1502	9	ANWYFGNFL		C1701	9	AAYPRPGML
C0202	9	ASNPRVTRF		C0401	9	CFDVKDVQM		C0403	9	FFDTNTSVL		C0501	9	ALDSGVSTM		C0602	9	ASSPVLRQM		C1502	9	AQMDYQLRL		C1701	9	AAYRRALEL
C0202	9	ASVGKTSIL		C0401	9	CFDVPTASV		C0403	9	FFDVTYRHF		C0501	9	ALDVPHAEL		C0602	9	ATIDGVRFL		C1502	9	AQNGIPLRI		C1701	9	AAYYHPSYL
C0202	9	ASYPHCLQF		C0401	9	CFNLFETGF		C0403	9	FFGTHETAF		C0501	9	ALDVPNTML		C0602	9	ATSFILRAV		C1502	9	AQNPSELYL		C1701	9	AFLIPLLVW
C0202	9	ATAAIHSFF		C0401	9	CFSLQETVF		C0403	9	FIDEAGHCM		C0501	9	AMDLVKNHL		C0602	9	AVKDLVVLL		C1502	9	AQNRFLLEL		C1701	9	AGIAHPSAL
C0202	9	ATAPRIKKF		C0401	9	CGDFPHLLV		C0403	9	FIDGGGSVL		C0501	9	ANDDPNGIF		C0602	9	AVNPLLRVI		C1502	9	AQYEHDLEV		C1701	9	AGVNTVTTL
C0202	9	ATFPKEIQM		C0401	9	CHDLTLAVL		C0403	9	FIDKPVCFV		C0501	9	AQDDPDSCL		C0602	9	AVSWVLRSV		C1502	9	AQYNFILVV		C1701	9	AGVPLFLLE
C0202	9	ATKARIPFY		C0401	9	CLDDTTVKF		C0403	9	FIEEGIVVM		C0501	9	AQDEHLITF		C0602	9	AYSDIVKMI		C1502	9	ASAAAALVL		C1701	9	AIIDKYIKL
C0202	9	ATSGVHSNF		C0401	9	CMDPFIYFF		C0403	9	FIEEHATKL		C0501	9	AQDLGVVNL		C0602	9	AYVQLIRSL		C1502	9	ASAASALHL		C1701	9	AILMTVALL
C0202	9	ATYHRAIKV		C0401	9	CWDHRPVQI		C0403	9	FIEEKTLLL		C0501	9	AQDPEIASL		C0602	9	CGSVLVRLI		C1502	9	ASAPRLMVL		C1701	9	AIMDLLLRL
C0202	9	AVIAPKSSY		C0401	9	CWQNYLDFH		C0403	9	FIPDQPFRV		C0501	9	AQDPVPSKL		C0602	9	CKPHFQQLF		C1502	9	ASDPRIIRL		C1701	9	AIVFIITRL
C0202	9	AVNALQSVY		C0401	9	CWQPVIDYI		C0403	9	FIPGRPMLL		C0501	9	ASDDGTVRI		C0602	9	CQYPGLQWV		C1502	9	ASDPYQVHV		C1701	9	ALDVFALWL
C0202	9	AVNGHTNSF		C0401	9	CYDFDVHTM		C0403	9	FIPPYVPRF		C0501	9	ASDDGYIKI		C0602	9	CRFQIVQVL		C1502	9	ASEFGNHYL		C1701	9	ALPKLPISL
C0202	9	AYNPQLNLK		C0401	9	CYDLAELLL		C0403	9	FIPSPPSFL		C0501	9	ASDDHTVCL		C0602	9	CRMEIIHEI		C1502	9	ASFDGTIKV		C1701	9	ALYSKGILL
C0202	9	CSSPIVVKF		C0401	9	CYDLGAAYF		C0403	9	FLDALIVSM		C0501	9	ASDDKTVKL		C0602	9	CSRYLYTLV		C1502	9	ASFDKSIKL		C1701	9	ANSHQGQML
C0202	9	CTYGKPVTF		C0401	9	DFDGQVVQV		C0403	9	FLDEPTNHL		C0501	9	ASDEGRVQM		C0602	9	DRYFRIQEV		C1502	9	ASFDRAIEM		C1701	9	AQFEHTILL
C0202	9	FAADIISVL		C0401	9	DFDLLNNSL		C0403	9	FLDLTEQEF		C0501	9	ASDHAPHTL		C0602	9	DYFEFPREL		C1502	9	ASFGSFHLI		C1701	9	AQLELISRI
C0202	9	FAAGYNVKF		C0401	9	DFDLVDALL		C0403	9	FLERLPMML		C0501	9	ASDIAMTEL		C0602	9	DYSPLIRVI		C1502	9	ASFHRVQAL		C1701	9	AQYDRQIRL
C0202	9	FAAHLRCTY		C0401	9	DFDMTLSRF		C0403	9	FLPEAPAEL		C0501	9	ASDIPGLHL		C0602	9	EAAQILRLL		C1502	9	ASFKAFRSL		C1701	9	ASDPRIIRL
C0202	9	FAAKFVTSF		C0401	9	DFDPALLEF		C0403	9	FLPPFPAHL		C0501	9	ASDKETYEL		C0602	9	EGYPFPREV		C1502	9	ASFPEYLVV		C1701	9	ASIGSTIFL
C0202	9	FAANVYEAF		C0401	9	DFDSVSSIM		C0403	9	FLPQKIIYL		C0501	9	ASDPDEAKL		C0602	9	EKPDIFQLV		C1502	9	ASFPGANII		C1701	9	ASINSTVRL
C0202	9	FACEKNENL		C0401	9	DFDVAVVTF		C0403	9	FQDPSVTQL		C0501	9	ASDPRIIRL		C0602	9	ERADLIAYL		C1502	9	ASFPHLRIL		C1701	9	ASIWFISCL
C0202	9	FACPKTDSL		C0401	9	DWDLMERFM		C0403	9	FSDCHVAWV		C0501	9	ASDPYQVHV		C0602	9	ERAGVVREL		C1502	9	ASFQEIMEV		C1701	9	ASTARHLYL
C0202	9	FADPHGKVF		C0401	9	DYDPLVVKL		C0403	9	FSDEWVACL		C0501	9	ASDQPSHSL		C0602	9	ERAYILNLV		C1502	9	ASFSDVRIL		C1701	9	ASTCVIIKL
C0202	9	FAFDPSVNY		C0401	9	DYDPQTVRL		C0403	9	FSDFLLTKL		C0501	9	ASEDATIKV		C0602	9	ERFNVPVSL		C1502	9	ASFTRAYLL		C1701	9	ASVDKVLEL
C0202	9	FAFEHSEEY		C0401	9	DYVDSALLM		C0403	9	FSDTGNFGF		C0501	9	ASEGKTVEV		C0602	9	ERFPYPFQV		C1502	9	ASFWGGMLV		C1701	9	ASVDKVTRL
C0202	9	FAFFDPVMY		C0401	9	EFDEVSRIV		C0403	9	FSEEHPVLL		C0501	9	ATDPRPCEV		C0602	9	ERIPKALEV		C1502	9	ASFYQRALL		C1701	9	ASVGKTSIL
C0202	9	FAFRYVTTI		C0401	9	EFDGTKVFL		C0403	9	FSEETPVVL		C0501	9	AVDAVIAEL		C0602	9	ERIPKTIEI		C1502	9	ASGPGLSFL		C1701	9	ATPVDPLFL
C0202	9	FAFVTDNTY		C0401	9	EFDIFTRLF		C0403	9	FSPFHASVL		C0501	9	AVDDGVNTF		C0602	9	ERPLFPQIL		C1502	9	ASGPPVSEL		C1701	9	ATYHRAIKV
C0202	9	FAHEVGHNF		C0401	9	EFDKLVALL		C0403	9	FTADPLSLL		C0501	9	AVDGNTVEL		C0602	9	ERPTFKILL		C1502	9	ASHFFNLMF		C1701	9	AVIESVTFL
C0202	9	FAHHASCHF		C0401	9	EFDLLDVRF		C0403	9	FTDAVVSWL		C0501	9	AVDGRTVNL		C0602	9	ERSGVIREV		C1502	9	ASHGFYEFL		C1701	9	AVIKGLTYL
C0202	9	FAHLINVEF		C0401	9	EFDNAGAMM		C0403	9	FTDEESRVF		C0501	9	AVDGSGTKF		C0602	9	ERVPFILTY		C1502	9	ASHLHLNSV		C1701	9	AVVPLVGKL
C0202	9	FAHLPKSTF		C0401	9	EFDPIPVLI		C0403	9	FTDERIFML		C0501	9	AVDKTGRIL		C0602	9	ERYAKIVEI		C1502	9	ASIFHQQEL		C1701	9	EAVDLITRL
C0202	9	FAHPSLWQL		C0401	9	EFDPLLREI		C0403	9	FTDFKVVNV		C0501	9	AVDLGGTNL		C0602	9	EYIKFLRSI		C1502	9	ASIGNAQKL		C1701	9	FAADIISVL
C0202	9	FAHPYQYEL		C0401	9	EFDPVMVIL		C0403	9	FTDFLIPML		C0501	9	AVDPNGAFL		C0602	9	EYLNFIRGV		C1502	9	ASILKQLAV		C1701	9	FAAGIIAHL
C0202	9	FAIPLIEKL		C0401	9	EFWLACEEF		C0403	9	FTDGITNKL		C0501	9	AVDPQPSVV		C0602	9	FAADIISVL		C1502	9	ASIQQTLKL		C1701	9	FAAGSATRL
C0202	9	FAIPLIERL		C0401	9	EGFSLFVKI		C0403	9	FTDIGKVDF		C0501	9	AVDRAITHL		C0602	9	FAFFDPVMY		C1502	9	ASIRIPRTV		C1701	9	FAAQSLVQL
C0202	9	FAIQRTTNF		C0401	9	EIGVLAKAF		C0403	9	FTDKRIGYL		C0501	9	CSDEVTRQL		C0602	9	FAFPGEILM		C1502	9	ASISHFMQF		C1701	9	FADAHRPKL
C0202	9	FAIYKMSFF		C0401	9	EISANFEAL		C0403	9	FTDKRVGYL		C0501	9	EIKDKTAEL		C0602	9	FAGDLVRNL		C1502	9	ASISHVAHV		C1701	9	FADDGVKYL
C0202	9	FAKEILPKY		C0401	9	EVSPEVVEI		C0403	9	FTDMFIYWI		C0501	9	EKAQGPILL		C0602	9	FAGLVPRLL		C1502	9	ASISLAQYL		C1701	9	FADFERHFL
C0202	9	FAKELQRSF		C0401	9	EWDPLDVRF		C0403	9	FTDNVPALV		C0501	9	EPSELPLPG		C0602	9	FAKDFMTYL		C1502	9	ASISRSLEL		C1701	9	FADGHVLEL
C0202	9	FAKEVLPKY		C0401	9	EWDQVTVYL		C0403	9	FTDSLISNL		C0501	9	ESSPPGTTF		C0602	9	FAKPFLASL		C1502	9	ASITLQQQL		C1701	9	FADGVILLL
C0202	9	FAKEVSHEM		C0401	9	EWDVLIAHF		C0403	9	FTDTSIILF		C0501	9	ETDPGMVHL		C0602	9	FAKVHILYV		C1502	9	ASITSFLTV		C1701	9	FADKHIQVL
C0202	9	FAKPENIDL		C0401	9	EYDNAIITM		C0403	9	FTDTVGNIL		C0501	9	FADAVQELL		C0602	9	FALPFGRTA		C1502	9	ASIVRVKKL		C1701	9	FADQAEILL
C0202	9	FAMEFVKYY		C0401	9	EYDPVIILI		C0403	9	FTDVIGHYI		C0501	9	FADDPCSSV		C0602	9	FALPYIRDV		C1502	9	ASIYKILHL		C1701	9	FADQEVRSL
C0202	9	FAMFSGTHV		C0401	9	FADFERHFL		C0403	9	FTDVNKIYL		C0501	9	FADENNEKL		C0602	9	FAMEFVKYY		C1502	9	ASKAWTLEV		C1701	9	FADSHLWKL
C0202	9	FAMPYFIQV		C0401	9	FADLNLAEF		C0403	9	FTDVVTTNL		C0501	9	FADGHVLEL		C0602	9	FASGLIHRV		C1502	9	ASLDLVLHL		C1701	9	FAERSVAKL
C0202	9	FANERCLQL		C0401	9	FADPIAANL		C0403	9	FTDYDVIHL		C0501	9	FADHVSSSL		C0602	9	FASPMKSVV		C1502	9	ASLDRTIKV		C1701	9	FAFRHVLKL
C0202	9	FANGHVNSV		C0401	9	FFDAAKLMF		C0403	9	FTEDHYVEF		C0501	9	FADKHIQVL		C0602	9	FASTILHLV		C1502	9	ASLDWPRMV		C1701	9	FAFRNFLYL
C0202	9	FANIDQETY		C0401	9	FFDACEVLL		C0403	9	FTEEIPLKI		C0501	9	FADNDVSRF		C0602	9	FAYEGPMYL		C1502	9	ASLEKVQKL		C1701	9	FAGNTPLHL
C0202	9	FAQDVGRMF		C0401	9	FFDAIFTQL		C0403	9	FTEFYTTLL		C0501	9	FADQAEILL		C0602	9	FAYPAIRYL		C1502	9	ASLERAQNL		C1701	9	FAHHLPVWL
C0202	9	FASGLIHRV		C0401	9	FFDALDHVI		C0403	9	FTETSIILF		C0501	9	FADQENQVA		C0602	9	FAYPAPLEV		C1502	9	ASLFSGRLV		C1701	9	FAHLINVEF
C0202	9	FASHVSPEV		C0401	9	FFDAQEVLL		C0403	9	FTPDIPTML		C0501	9	FADQEVRSL		C0602	9	FFPDFIWTV		C1502	9	ASLGLQLEV		C1701	9	FAIDPHLLL
C0202	9	FASNVVEKC		C0401	9	FFDDCIEKL		C0403	9	FVDDYTVRV		C0501	9	FADQVEEIL		C0602	9	FFSANPKEL		C1502	9	ASLGYVVVV		C1701	9	FAILSFLHI
C0202	9	FASPKIDSV		C0401	9	FFDDLLVVL		C0403	9	FVDEFLTYL		C0501	9	FADREVQLL		C0602	9	FFSEYEKLL		C1502	9	ASLHVMMTL		C1701	9	FAIPGSIFL
C0202	9	FAVPKNYKL		C0401	9	FFDDLSDSF		C0403	9	FVDIVKVLL		C0501	9	FADVAPLQL		C0602	9	FGFHKPKMY		C1502	9	ASLISVRNL		C1701	9	FAIPGSSFL
C0202	9	FAYEGPMYL		C0401	9	FFDEESYSL		C0403	9	FVDLEPTVI		C0501	9	FADVEGKNL		C0602	9	FGSAVPRNV		C1502	9	ASLLFKTLL		C1701	9	FAIPLIEKL
C0202	9	FAYHMIETY		C0401	9	FFDEGTINF		C0403	9	FVDLSGHNL		C0501	9	FADYPCHTV		C0602	9	FGVDRAILY		C1502	9	ASLMHSFIL		C1701	9	FAISILQQI
C0202	9	FAYHYPYTY		C0401	9	FFDEKLNSL		C0403	9	FVDPAQITM		C0501	9	FAEAGRSTL		C0602	9	FGVPLIVHV		C1502	9	ASLPKPFFL		C1701	9	FALPSPQHI
C0202	9	FAYPAIRYL		C0401	9	FFDEVVKQM		C0403	9	FVDTNLYFL		C0501	9	FAEAVKTVF		C0602	9	FGYPDPTYL		C1502	9	ASLPLVLYI		C1701	9	FALRIASRL
C0202	9	FAYPSELKA		C0401	9	FFDGELTKV		C0403	9	FVDWCPTGF		C0501	9	FAEDPPTSL		C0602	9	FHIDFGHFL		C1502	9	ASLPRVLRV		C1701	9	FALSGPLFL
C0202	9	FAYTARISV		C0401	9	FFDHASAAL		C0403	9	FVEEEEHFL		C0501	9	FAEEVGAAL		C0602	9	FHPTMPLIV		C1502	9	ASLPTSVQV		C1701	9	FAMPYFIQV
C0202	9	FAYYRVGEY		C0401	9	FFDHCLFTM		C0403	9	FVEETVYLL		C0501	9	FAEHRPPKI		C0602	9	FHYPGVQNL		C1502	9	ASLPYAQQL		C1701	9	FANERCLQL
C0202	9	FFSEKIYKL		C0401	9	FFDHQDQVW		C0403	9	FVEGLIVTL		C0501	9	FAEKLSVKL		C0602	9	FIKSFLVFI		C1502	9	ASLSEVLEL		C1701	9	FASEYPLIL
C0202	9	FGADARALM		C0401	9	FFDHSGTLV		C0403	9	FVEGRSVEF		C0501	9	FAEMYVAKF		C0602	9	FKFIIPQIV		C1502	9	ASLSHQSLV		C1701	9	FASFKPTYL
C0202	9	FGADVVSKF		C0401	9	FFDHSTRIV		C0403	9	FVEPFVILL		C0501	9	FAEPSSVSF		C0602	9	FKFPGRQKI		C1502	9	ASLSLPLVL		C1701	9	FASHVSPEV
C0202	9	FGATNPKNF		C0401	9	FFDIPVDNL		C0403	9	FWDGKIVLV		C0501	9	FAERSVAKL		C0602	9	FKMTIPLLV		C1502	9	ASLTKILVI		C1701	9	FASKHAVKL
C0202	9	FGFHKPKMY		C0401	9	FFDLNDTKL		C0403	9	FWPPYVELL		C0501	9	FAERTVAKL		C0602	9	FKPAMPRSV		C1502	9	ASLVFPLLV		C1701	9	FASTYLLLL
C0202	9	FGFPDPKLF		C0401	9	FFDMAYQGF		C0403	9	FYDERIVVV		C0501	9	FAETHRTVL		C0602	9	FKPDDPNLL		C1502	9	ASLVIAQLL		C1701	9	FATKTVIYL
C0202	9	FGHVQRAEM		C0401	9	FFDNISSEL		C0403	9	GADNSVVRF		C0501	9	FAIDPHLLL		C0602	9	FKPPVLVFV		C1502	9	ASLWQELEV		C1701	9	FATKVVHLL
C0202	9	FGYPKRLIM		C0401	9	FFDNLVYYI		C0403	9	GDLPNGRVC		C0501	9	FAIPLIEKL		C0602	9	FKPTRIIFY		C1502	9	ASLYLLRVL		C1701	9	FAVALPQLL
C0202	9	FIANLFNRY		C0401	9	FFDNRPGKL		C0403	9	GLVEGAKNI		C0501	9	FGDDIPSAL		C0602	9	FKSHLIRLI		C1502	9	ASMIHPKEV		C1701	9	FAVDREARL
C0202	9	FIEELFSLM		C0401	9	FFDPAIRVL		C0403	9	GSDEPPVFL		C0501	9	FGDTGGFHF		C0602	9	FKYDGEIRV		C1502	9	ASMSVVLKL		C1701	9	FAVEYFTRL
C0202	9	FIIPQIVKY		C0401	9	FFDPDTNIV		C0403	9	GSDPRVTQL		C0501	9	FIDDANYSV		C0602	9	FLADIVQKL		C1502	9	ASMVLPRAV		C1701	9	FAVNSVLRL
C0202	9	FIIQGLRSV		C0401	9	FFDPHQSTF		C0403	9	HADILLINL		C0501	9	FIDEAGHCM		C0602	9	FLFDHLLTL		C1502	9	ASNGSLLKV		C1701	9	FAVTLETVL
C0202	9	FIKDGSSTY		C0401	9	FFDPSLLHL		C0403	9	HADVGVALL		C0501	9	FIDGHFVEM		C0602	9	FLFGYPKRL		C1502	9	ASNGVLLLM		C1701	9	FAVYIHALL
C0202	9	FIMGKTIEF		C0401	9	FFDSAYQGF		C0403	9	HFDDFVTNL		C0501	9	FIDKPVCFV		C0602	9	FLFPHSVLV		C1502	9	ASNIMEVKI		C1701	9	FAYEGPMYL
C0202	9	FIMGKVPVF		C0401	9	FFDSVQVVF		C0403	9	HFDDTVVCL		C0501	9	FIEEHATKL		C0602	9	FLFQEPRSI		C1502	9	ASNIMIVTL		C1701	9	FAYGLLMEL
C0202	9	FIMPIEVHF		C0401	9	FFDTELENL		C0403	9	HFDFQGCNF		C0501	9	FIEESRQLL		C0602	9	FLFQGFRLV		C1502	9	ASNIVSLKV		C1701	9	FAYLRDLLI
C0202	9	FINPKPITY		C0401	9	FFDTNTSVL		C0403	9	HFDGFVVEV		C0501	9	FIESAHTEL		C0602	9	FLIPFVITV		C1502	9	ASNKSPLVL		C1701	9	FAYNFREEL
C0202	9	FINQNLRTY		C0401	9	FFDTSVPLM		C0403	9	HFDIVIRNL		C0501	9	FLDASGAKL		C0602	9	FLIPLVRTL		C1502	9	ASNLIEVFV		C1701	9	FAYPAIRYL
C0202	9	FIRVVGSEF		C0401	9	FFDVLIKSM		C0403	9	HFDLNLRQF		C0501	9	FLDEKTHEL		C0602	9	FLLEHIRIL		C1502	9	ASNPAMLLY		C1701	9	FAYPAPLEV
C0202	9	FISKKEWYV		C0401	9	FFDVTYRHF		C0403	9	HFDLSVIEL		C0501	9	FLDENVHFF		C0602	9	FLPAFVKKM		C1502	9	ASNPELLNL		C1701	9	FAYTRLQLL
C0202	9	FITKIISKF		C0401	9	FFDYSGRDL		C0403	9	HFDPEVVQI		C0501	9	FLDEPTNHL		C0602	9	FLPDHPIVL		C1502	9	ASNPKILSL		C1701	9	FGCSAVVRL
C0202	9	FIYHLPQEF		C0401	9	FFEEHISSV		C0403	9	HFDYQSLLM		C0501	9	FLDNGPKTI		C0602	9	FLPITPHYV		C1502	9	ASNPRGLFV		C1701	9	FGIDRPAEL
C0202	9	FLADIVQKL		C0401	9	FFEGKCVEL		C0403	9	HIPDVITYL		C0501	9	FLDQHGHNL		C0602	9	FLPLFDRVL		C1502	9	ASNPRVTRF		C1701	9	FGLDLVTEL
C0202	9	FLAPLFSSF		C0401	9	FFEPWVYSF		C0403	9	HLDPGPIYM		C0501	9	FLDSEVSEL		C0602	9	FLPNFVKML		C1502	9	ASNVMQLLL		C1701	9	FGYIHAIKL
C0202	9	FLAPLVTEY		C0401	9	FFEVFDNSM		C0403	9	HTDLPVSVF		C0501	9	FLDSTSPLL		C0602	9	FLYPFPLAL		C1502	9	ASNYFRAMF		C1701	9	FGYKHVLTL
C0202	9	FLCGVMKTY		C0401	9	FFEVFTPVF		C0403	9	HVPEHAVVL		C0501	9	FLEDHGLLV		C0602	9	FMADLERVL		C1502	9	ASQLYLLFL		C1701	9	FGYPDPTYL
C0202	9	FLIDRSPEY		C0401	9	FFEVSPVSF		C0403	9	HYDEQQNFF		C0501	9	FLEDSNVKL		C0602	9	FQAEIAQLM		C1502	9	ASQQKILSL		C1701	9	FIGKIPIML
C0202	9	FLKDLVASV		C0401	9	FFGTHETAF		C0403	9	HYDPATEEF		C0501	9	FLEEHGPAM		C0602	9	FQFQNLRQL		C1502	9	ASQSVQLEL		C1701	9	FIGKLRSNL
C0202	9	FLKEIVETF		C0401	9	FFHLVNSEM		C0403	9	HYDVQSILF		C0501	9	FLEKESAIV		C0602	9	FQIGKMRYV		C1502	9	ASQYFMLLL		C1701	9	FIPKFITHL
C0202	9	FLKEVVETF		C0401	9	FFIPDIEYL		C0403	9	IADGGFTEL		C0501	9	FQDDDQTRV		C0602	9	FQIVNPHLL		C1502	9	ASRTRITFV		C1701	9	FITEFPLFL
C0202	9	FLPKMPWSI		C0401	9	FFKELIQEF		C0403	9	IADGLPVAV		C0501	9	FQDFNPSKF		C0602	9	FQKERAIFL		C1502	9	ASSAAPLFF		C1701	9	FIYKHGLKL
C0202	9	FLQQPRPLM		C0401	9	FFNLTVKEM		C0403	9	IADIHPIQV		C0501	9	FQDGPKSYL		C0602	9	FQKIQVRLV		C1502	9	ASSDKRLYM		C1701	9	FLAHIYTEL
C0202	9	FLRDKIASY		C0401	9	FFNQHIITF		C0403	9	IADIIRTCL		C0501	9	FQDKQVSRV		C0602	9	FQPDLVKRI		C1502	9	ASSELERLI		C1701	9	FLANVSTVL
C0202	9	FLYDKALTF		C0401	9	FFNYKVVLL		C0403	9	IADIVTSVF		C0501	9	FQDPVPLTV		C0602	9	FQPFLKKWY		C1502	9	ASSFVFLNL		C1701	9	FLCDVDIRL
C0202	9	FLYPFPLAL		C0401	9	FFPAFITLL		C0403	9	IADLAHLLL		C0501	9	FQDSGLSRF		C0602	9	FQYESKVFY		C1502	9	ASSGDFLDL		C1701	9	FLFELPSRL
C0202	9	FQAEIAQLM		C0401	9	FFPEDPVKI		C0403	9	IADLGLIRV		C0501	9	FQEADSPTL		C0602	9	FQYPDTRYL		C1502	9	ASSGDILQL		C1701	9	FLFSKFIEL
C0202	9	FQAHLTKKF		C0401	9	FFPFDPCVL		C0403	9	IADLISSFL		C0501	9	FSDDSDLQL		C0602	9	FRADNLNKL		C1502	9	ASSGLLLMI		C1701	9	FLLQHQTFL
C0202	9	FQAPTAKEM		C0401	9	FFSEKIYKL		C0403	9	IADLMEEKF		C0501	9	FSDEIRHNL		C0602	9	FRAEINILL		C1502	9	ASSPEHPEL		C1701	9	FLPDHPIVL
C0202	9	FQIDRSWKA		C0401	9	FFSEREASF		C0403	9	IADLPSTQL		C0501	9	FSDENVPRL		C0602	9	FRAFLKSEF		C1502	9	ASSPGILVL		C1701	9	FLPQKIIYL
C0202	9	FQIGKMRYV		C0401	9	FFSPKVVSL		C0403	9	IADLVTSVL		C0501	9	FSDKQMIKL		C0602	9	FRAPSMKEL		C1502	9	ASSPHGLVM		C1701	9	FLPSSVLWL
C0202	9	FQNKKRVLL		C0401	9	FFVENVSEL		C0403	9	IADLVVAVF		C0501	9	FSDLTMHEL		C0602	9	FRAQRNLYI		C1502	9	ASSPIPVVI		C1701	9	FLSHIPITL
C0202	9	FQNPVVTKC		C0401	9	FFYTHLINF		C0403	9	IADPIVLAL		C0501	9	FSDSSGLTV		C0602	9	FRASSTLKV		C1502	9	ASSPISHFL		C1701	9	FLSSVIQNL
C0202	9	FQNTIREMF		C0401	9	FHPARPFLL		C0403	9	IADPNIAKL		C0501	9	FSDSVKSTF		C0602	9	FREPRLLVV		C1502	9	ASSPKFSEL		C1701	9	FLTRIISQL
C0202	9	FQNVQQVEY		C0401	9	FHYDYIDLL		C0403	9	IADRLNVEF		C0501	9	FSDTGNFGF		C0602	9	FRFDGVTSM		C1502	9	ASSPLRLWL		C1701	9	FLWERPTLL
C0202	9	FQRKAIERF		C0401	9	FIDYNLYGM		C0403	9	IADSNPMVV		C0501	9	FSDTLKTYF		C0602	9	FRFEEPVVL		C1502	9	ASSPPHLQF		C1701	9	FLYAGHIFL
C0202	9	FQRNIKKEY		C0401	9	FLDALIVSM		C0403	9	IADTVPKYL		C0501	9	FSEEHPVLL		C0602	9	FRFEMQRDL		C1502	9	ASSRMFLLV		C1701	9	FLYPFPLAL
C0202	9	FQRPTIYYV		C0401	9	FLDDFIACV		C0403	9	IFDEFRTVL		C0501	9	FSEETPVVL		C0602	9	FRFENVNGY		C1502	9	ASSSLPKKL		C1701	9	FLYQYSTRL
C0202	9	FQYAKESYI		C0401	9	FLDENVVSF		C0403	9	IFDGNVAHI		C0501	9	FTDEESRVF		C0602	9	FRFGNPLHI		C1502	9	ASSSQIIHI		C1701	9	FMVDRVVDL
C0202	9	FQYESKVFY		C0401	9	FLDEPTNHL		C0403	9	IFDLGGGTF		C0501	9	FTDGGPRTL		C0602	9	FRFIEVQTL		C1502	9	ASSSYDLTV		C1701	9	FQNIRPLFI
C0202	9	FSEPFHLIV		C0401	9	FLDFAPHYF		C0403	9	IFDLSCMGF		C0501	9	FTDGITNKL		C0602	9	FRFMATNDL		C1502	9	ASSSYNMVI		C1701	9	FQSSAVMAL
C0202	9	FSKDIVENY		C0401	9	FLDLARNIF		C0403	9	IFDNTFSRF		C0501	9	FTDIGKVDF		C0602	9	FRFNHPVEV		C1502	9	ASTAFNLQV		C1701	9	FQYSKSPSL
C0202	9	FSKNITATF		C0401	9	FLDLSENLI		C0403	9	IFDPTRECM		C0501	9	FTEDHYVEF		C0602	9	FRFPAAVVV		C1502	9	ASTALVWVV		C1701	9	FSCGVISTL
C0202	9	FSKPSSDTF		C0401	9	FLDLSIIRF		C0403	9	IFDPVKQQF		C0501	9	FVDCPGHDI		C0602	9	FRFPETTFI		C1502	9	ASTARHLYL		C1701	9	FSHAQTVVL
C0202	9	FSNPNIQKI		C0401	9	FLDLSSNQL		C0403	9	IFDQSGTYL		C0501	9	FVDDQQTFF		C0602	9	FRFPHIDLV		C1502	9	ASTDGHLRV		C1701	9	FSHSQITRL
C0202	9	FSNPRALYL		C0401	9	FLDLTEQEF		C0403	9	IFDRVLTEL		C0501	9	FVDDYTVRV		C0602	9	FRFPKDRAV		C1502	9	ASTEVKLRL		C1701	9	FSIPCEPNL
C0202	9	FSNPYSIEY		C0401	9	FLDSEVSEL		C0403	9	IFDSKVTEI		C0501	9	FVDEGKATV		C0602	9	FRFPSGAEL		C1502	9	ASTFRLLTV		C1701	9	FSLAPITKL
C0202	9	FSSDLQKTF		C0401	9	FLDSQTATF		C0403	9	IFDVHVHEV		C0501	9	FVDGSAIQV		C0602	9	FRGPTVSNI		C1502	9	ASTILHLVV		C1701	9	FSLMVVNRL
C0202	9	FSSPHLVQV		C0401	9	FLDWPQGTF		C0403	9	IFDVLPNFF		C0501	9	FVDLEPTVI		C0602	9	FRHENIAEL		C1502	9	ASTPAILFL		C1701	9	FSLPGATCL
C0202	9	FSYAFPKEF		C0401	9	FLPDHPIVL		C0403	9	IIDDALVRL		C0501	9	FVDPAQITM		C0602	9	FRHPHIIKL		C1502	9	ASTSRLLSV		C1701	9	FSLPHVGYL
C0202	9	FSYQHAIEE		C0401	9	FLPEAPAEL		C0403	9	IIDDLPCRF		C0501	9	FVDVQPSSL		C0602	9	FRHPVLIFI		C1502	9	ASTSRSLAL		C1701	9	FSNPRALYL
C0202	9	FTAAIISRV		C0401	9	FLPELPADL		C0403	9	IIDEFIYQF		C0501	9	FVEEEEHFL		C0602	9	FRIAFEQQL		C1502	9	ASTTQHLRL		C1701	9	FSTFTITRL
C0202	9	FTAKVWDAV		C0401	9	FLPPFPAHL		C0403	9	IIDEQPLIF		C0501	9	FVEGRSVEF		C0602	9	FRIEGVKSV		C1502	9	ASTVRILEV		C1701	9	FSVCHILLL
C0202	9	FTFSGICRV		C0401	9	FLYPFPLAL		C0403	9	IIDEVVNKF		C0501	9	FVEPSRQFV		C0602	9	FRIEYEPLV		C1502	9	ASTWVFPTL		C1701	9	FSVPLPARL
C0202	9	FTHASPTLF		C0401	9	FMDDKRVYI		C0403	9	IIDKEVSLM		C0501	9	GADDRLVKI		C0602	9	FRINEANQL		C1502	9	ASVDKVLEL		C1701	9	FTCQRILFL
C0202	9	FTHLSLQEF		C0401	9	FMDESTQCF		C0403	9	IIEEEFVSL		C0501	9	GADEAPPRL		C0602	9	FRKDFISRI		C1502	9	ASVDKVTRL		C1701	9	FTCRHVVHL
C0202	9	FTIFRTISV		C0401	9	FMDFQMQRM		C0403	9	IIEEHPPMI		C0501	9	GADEKVLRV		C0602	9	FRKEFQPFL		C1502	9	ASVGRLLEL		C1701	9	FTDVNKIYL
C0202	9	FTITKTVEY		C0401	9	FSEEHPVLL		C0403	9	IIPPEPSYL		C0501	9	GADFLVTEV		C0602	9	FRKEFYEVV		C1502	9	ASVPKELYL		C1701	9	FTIGKAIWL
C0202	9	FTKIMKSKY		C0401	9	FTDEESRVF		C0403	9	ILDPHVVLL		C0501	9	GADIHSKEF		C0602	9	FRKPGEKTF		C1502	9	ASVVTVLRV		C1701	9	FTLSHITQL
C0202	9	FTVPHTHVF		C0401	9	FTDFDPHHF		C0403	9	ILPTAPMLV		C0501	9	GADKNVVVF		C0602	9	FRLDTPLYF		C1502	9	ASWDHTIRV		C1701	9	FTMKTVLML
C0202	9	FTVTFNPKY		C0401	9	FTDVIGHYI		C0403	9	IQPDNIVYV		C0501	9	GADLPNLLF		C0602	9	FRMINEQQV		C1502	9	ASWPHIQLV		C1701	9	FTPDIPTML
C0202	9	FVAEQKVEY		C0401	9	FTEDHYVEF		C0403	9	ISDEGIAYL		C0501	9	GADLPSNHV		C0602	9	FRMPIINNL		C1502	9	ASYEFVQRL		C1701	9	FTSDIALRL
C0202	9	FVANLFNKY		C0401	9	FTEKEWPLL		C0403	9	ISDHYPVEV		C0501	9	GADNSVVRF		C0602	9	FRMPVLREY		C1502	9	ASYEKKVRL		C1701	9	FTYKQVVDL
C0202	9	FVHPDPLWI		C0401	9	FVDDYTVRV		C0403	9	ISDLDTIWL		C0501	9	GADPNATTL		C0602	9	FRNDFLELL		C1502	9	ASYFEPLIL		C1701	9	FTYNIPTCL
C0202	9	FVKDSGACF		C0401	9	FWADKVASL		C0403	9	ITDEGLITI		C0501	9	GADPSTVEM		C0602	9	FRNEFQNLL		C1502	9	ASYKKAIIL		C1701	9	FVAESHIIL
C0202	9	FVKDSIRLV		C0401	9	FWDDAVKEV		C0403	9	ITDGVITDL		C0501	9	GADSKTVKL		C0602	9	FRNFFSNMF		C1502	9	ASYPAPQEV		C1701	9	FVANAIIHL
C0202	9	FVKKIGGIF		C0401	9	FWDGKIVLV		C0403	9	ITDHLIAML		C0501	9	GDAVSPRQL		C0602	9	FRNGLGNQL		C1502	9	ASYPIPIIL		C1701	9	FVFPGELLL
C0202	9	FVKPAFEEF		C0401	9	FWDKKVTHF		C0403	9	ITDILVTEF		C0501	9	GIDSPVSEL		C0602	9	FRNNRFPNL		C1502	9	ASYSGLMRI		C1701	9	FVHDLVLYL
C0202	9	FVKPAVVTV		C0401	9	FWDPSVNLF		C0403	9	ITDKEVIYI		C0501	9	GIDSSSPEV		C0602	9	FRNPKTSFY		C1502	9	ASYTKALKL		C1701	9	FVIDLQTRL
C0202	9	FVNKFNVLY		C0401	9	FWDYGRIAL		C0403	9	ITDKGIIAL		C0501	9	GSDDGTVKL		C0602	9	FRNPLAPAV		C1502	9	ASYVNLPTI		C1701	9	FVLQRLVFL
C0202	9	FVNPHVSSF		C0401	9	FWEQKPLLI		C0403	9	ITDLPSEVL		C0501	9	GSDPRVTQL		C0602	9	FRPDLIEMV		C1502	9	ATAKNVLKL		C1701	9	FVLRVMTQL
C0202	9	FVRDMIREV		C0401	9	FWESSIVYL		C0403	9	ITDPDVVHI		C0501	9	GSDPTVVSI		C0602	9	FRPEHVSRL		C1502	9	ATAPPHVTV		C1701	9	FVMETFVHL
C0202	9	GAAGVHFIY		C0401	9	FWPLIPQFV		C0403	9	ITDPEVVFV		C0501	9	HADDFIQEM		C0602	9	FRPEKVLQI		C1502	9	ATASNLVKV		C1701	9	FVVDIESRL
C0202	9	GADGSVRMF		C0401	9	FWPPYVELL		C0403	9	ITDPQQLQL		C0501	9	HADDPERVV		C0602	9	FRPELKVLV		C1502	9	ATASVNLKV		C1701	9	FVYENPISL
C0202	9	GAFGLPITV		C0401	9	FYDDTYNTL		C0403	9	ITDPRTVFV		C0501	9	HADGLCHRL		C0602	9	FRPEWTQRY		C1502	9	ATAVVQLYL		C1701	9	GAADGVIRL
C0202	9	GAHGIIVVY		C0401	9	FYDECLRKY		C0403	9	ITDPSVIVM		C0501	9	HADHIGQGF		C0602	9	FRPLYTHEY		C1502	9	ATDNIILTV		C1701	9	GAAPAPTAV
C0202	9	GAVGFFTHY		C0401	9	FYDERIVVV		C0403	9	ITDQYIYMV		C0501	9	HADHSSLTL		C0602	9	FRPPGTSDL		C1502	9	ATEPHVRMV		C1701	9	GADARALML
C0202	9	GAVTKTHVM		C0401	9	FYDGIKAIF		C0403	9	ITDVQLAIF		C0501	9	HADILLINL		C0602	9	FRPPITQEI		C1502	9	ATFDEVLEL		C1701	9	GADNSVVRF
C0202	9	GAYGQAVRY		C0401	9	FYDGIKAIL		C0403	9	ITENFPLKL		C0501	9	HADIPETCV		C0602	9	FRPPKEVHL		C1502	9	ATFLQISTV		C1701	9	GADPNATTL
C0202	9	GAYGTPQKY		C0401	9	FYDGVVQTV		C0403	9	IVDDFGTHL		C0501	9	HADPEPSVI		C0602	9	FRPQRPQSL		C1502	9	ATFPKEIQM		C1701	9	GADPSTVEM
C0202	9	GAYKYIQEL		C0401	9	FYDPDTVEL		C0403	9	IVDDHTPWV		C0501	9	HADSNIVIM		C0602	9	FRPTFENLI		C1502	9	ATHGAALTV		C1701	9	GAFFGPIRL
C0202	9	GAYTVTIKY		C0401	9	FYDPDVGNF		C0403	9	IVDEAIYYF		C0501	9	HADVGVALL		C0602	9	FRQEKAVWI		C1502	9	ATHGRFLEI		C1701	9	GAFGKETDL
C0202	9	GIYPHKLVF		C0401	9	FYDPRSLDI		C0403	9	IVDEVNGLI		C0501	9	HAMQFPAEL		C0602	9	FRQGLIRVL		C1502	9	ATIARELLM		C1701	9	GAHQGVAVL
C0202	9	GQNKKVMIY		C0401	9	FYDQRQVLL		C0403	9	IVDGAVVKF		C0501	9	HIDFGGTSV		C0602	9	FRQIIAVVL		C1502	9	ATIDGVRFL		C1701	9	GAIARPACL
C0202	9	GTAMIFTCF		C0401	9	FYDSELFRM		C0403	9	IVDGRVYYI		C0501	9	HIDSGKTAL		C0602	9	FRSAEPNAL		C1502	9	ATIDKVVKI		C1701	9	GAIFVPIHL
C0202	9	GVIKRTENV		C0401	9	FYDSQGIHF		C0403	9	IVDIPGTSV		C0501	9	HIDSGKTTL		C0602	9	FRSEDIKRL		C1502	9	ATIKLQSTV		C1701	9	GAILVVTKL
C0202	9	GVIQPGRGF		C0401	9	FYDSQPTLI		C0403	9	IVDRPVTLV		C0501	9	HIDVITAEM		C0602	9	FRSEHELDV		C1502	9	ATILKLLEV		C1701	9	GAINHVLQL
C0202	9	GVKSVGQGY		C0401	9	FYDTKVTVM		C0403	9	IVDTPEVVL		C0501	9	HLDDQMTLL		C0602	9	FRSFVVSKF		C1502	9	ATILRELEV		C1701	9	GAISKIFVL
C0202	9	HAAGFAYTY		C0401	9	FYDVQFKEL		C0403	9	IVDVRPTLV		C0501	9	HLDEARTLL		C0602	9	FRSLLINAV		C1502	9	ATIRKALRL		C1701	9	GAQLHVTYL
C0202	9	HAAHIISEL		C0401	9	FYDWDNTEL		C0403	9	IVENLLMIL		C0501	9	HLDPGPIYM		C0602	9	FRSPLARQL		C1502	9	ATISSPLEL		C1701	9	GASNSAPHL
C0202	9	HAFGSATQF		C0401	9	FYEAAIPEM		C0403	9	IVPKKPPLL		C0501	9	HPDAPMSQV		C0602	9	FRSVFPLSV		C1502	9	ATISYILTL		C1701	9	GATLRTSRL
C0202	9	HAIDIICGF		C0401	9	FYEDNVLYM		C0403	9	IWDETPLYF		C0501	9	HQDFPSVVL		C0602	9	FRTEKIRKL		C1502	9	ATKIVFLTV		C1701	9	GATPTPLLL
C0202	9	HAIKSVKIY		C0401	9	FYEEKEVDL		C0403	9	IWDPVLSVM		C0501	9	HSEESQIYL		C0602	9	FRTPFPLAF		C1502	9	ATLEKVIEI		C1701	9	GATSLVTLL
C0202	9	HAMEEVKKF		C0401	9	FYEERALYL		C0403	9	IYDFIGEFM		C0501	9	HTDDSALCM		C0602	9	FRVDYILSV		C1502	9	ATLGATLKL		C1701	9	GATTTAPSL
C0202	9	HAYIHSVQF		C0401	9	FYEETKVKF		C0403	9	IYDLATQTL		C0501	9	HTDLPVSVF		C0602	9	FRVEYASKV		C1502	9	ATLHLLLTL		C1701	9	GATVTVLRL
C0202	9	HAYPYPQMY		C0401	9	FYESLPPEM		C0403	9	IYDLVDRHL		C0501	9	HTDVADVLL		C0602	9	FRYEGEWKA		C1502	9	ATLKLQSEL		C1701	9	GAVERPLSL
C0202	9	HGIDPTGTY		C0401	9	FYETLPAEM		C0403	9	IYDSVKVYF		C0501	9	HTEEKPFEV		C0602	9	FRYFSKQEL		C1502	9	ATLNSFIHV		C1701	9	GAVGSRVTL
C0202	9	HIIGRIESY		C0401	9	FYETLPVAI		C0403	9	KADEKIIFL		C0501	9	HVDGHLYEL		C0602	9	FRYHGLSSL		C1502	9	ATLQLSLKL		C1701	9	GAVKKLTKL
C0202	9	HIMEIFSTY		C0401	9	FYEVVDARL		C0403	9	KADGVPVYL		C0501	9	HVDGVAVTL		C0602	9	FRYPFAPMY		C1502	9	ATLTRPLAL		C1701	9	GAVPGITKF
C0202	9	HQITVLHVY		C0401	9	FYIESISYL		C0403	9	KADSVVVLL		C0501	9	HVDTGNSYL		C0602	9	FRYPQDYQF		C1502	9	ATMGHWILL		C1701	9	GAVPIFIEL
C0202	9	HQYDGLVEL		C0401	9	FYNERVVIM		C0403	9	KADVVISAF		C0501	9	HVDTLVTKF		C0602	9	FRYPTTEEL		C1502	9	ATMKDFTSL		C1701	9	GAVPIFIKL
C0202	9	HTADISSHF		C0401	9	FYNTSIEEM		C0403	9	KADVVPVTL		C0501	9	IADDADPRV		C0602	9	FSATLPKLL		C1502	9	ATMKRMLSL		C1701	9	GAVSTASHL
C0202	9	HTFLPKIFF		C0401	9	FYPEEVSSM		C0403	9	KFDDIRIYF		C0501	9	IADENGAYL		C0602	9	FSFQLPRRL		C1502	9	ATMPVTMLI		C1701	9	GAYGGGAKL
C0202	9	HTIGKTVEY		C0401	9	FYPPDPAQL		C0403	9	KFDFPVSYL		C0501	9	IADGGFTEL		C0602	9	FSPFHASVL		C1502	9	ATMPVVPSV		C1701	9	GAYGKVFLV
C0202	9	HVNGIVQKY		C0401	9	FYPPKVELF		C0403	9	KIDDKPVKI		C0501	9	IADGLPVAV		C0602	9	FSQNIGRQV		C1502	9	ATNAAVTVL		C1701	9	GAYHAVVLL
C0202	9	IAADILIKE		C0401	9	FYQCEVVRL		C0403	9	KSDPLCVLL		C0501	9	IADIHPIQV		C0602	9	FSYAFPKAV		C1502	9	ATNHKVLLF		C1701	9	GAYKYIQEL
C0202	9	IAAGIFNDL		C0401	9	FYSNKEIFL		C0403	9	KSDPSIVLL		C0501	9	IADIKRTVL		C0602	9	FSYSCPKFL		C1502	9	ATNHRVLLF		C1701	9	GAYRGGERL
C0202	9	IAAKKVLRL		C0401	9	GFDAVTGEF		C0403	9	KSDPSIVRL		C0501	9	IADKTENTL		C0602	9	FTAAFPRML		C1502	9	ATNLLKLFL		C1701	9	GAYSPIVLL
C0202	9	IAAPFTSKL		C0401	9	GFDERVTVM		C0403	9	KTDAVTVLL		C0501	9	IADLMEEKF		C0602	9	FTADFVRQL		C1502	9	ATNNLMKLV		C1701	9	GAYTQVIFL
C0202	9	IAFGFHQLY		C0401	9	GFDFSGAEI		C0403	9	KTDDLITRF		C0501	9	IADLPSTQL		C0602	9	FTHDWMVFV		C1502	9	ATNPEHLEI		C1701	9	GAYVHMVTH
C0202	9	IAFPKAEEL		C0401	9	GFDHHVVRV		C0403	9	KTDIIDHSF		C0501	9	IADLVSKEL		C0602	9	FTPNNIKQV		C1502	9	ATNPISRVL		C1701	9	GGITSVIKL
C0202	9	IAFPTSISV		C0401	9	GFDLQETLV		C0403	9	KTDKTLVLL		C0501	9	IADPDQPVL		C0602	9	FTSPAVKRL		C1502	9	ATNPKPVKL		C1701	9	GISPVPINL
C0202	9	IAFSRPVKY		C0401	9	GFDLSEEKF		C0403	9	KTDQFPLFL		C0501	9	IADPNIAKL		C0602	9	FTSQVIRNL		C1502	9	ATNVVRLLL		C1701	9	GIVGVFVKL
C0202	9	IAGYVTHLM		C0401	9	GMDVAASEF		C0403	9	KTDQLVSFL		C0501	9	IADPRGNTL		C0602	9	FTTSNIRKV		C1502	9	ATQTQFFHV		C1701	9	GLIDHQTYL
C0202	9	IAIGKVLKL		C0401	9	GWDEALLTM		C0403	9	KTDVTVVRF		C0501	9	IADQEEVKV		C0602	9	FTVDQIRAI		C1502	9	ATSGDYLRV		C1701	9	GLIENPALL
C0202	9	IAIPFLIKL		C0401	9	GWDVAELQL		C0403	9	LADAINTEF		C0501	9	IADRGAEYV		C0602	9	FTVPFLRDV		C1502	9	ATSPTVLYV		C1701	9	GLPRWVTLL
C0202	9	IAIPVTVAF		C0401	9	GYDTRVTIL		C0403	9	LADAVAVTM		C0501	9	IADRLNVEF		C0602	9	FTYKGLRAL		C1502	9	ATTDLLTKL		C1701	9	GLYCGKTLL
C0202	9	IAISRTPVL		C0401	9	GYDTRVTVL		C0403	9	LADEAEVHL		C0501	9	IADRPPPVI		C0602	9	FVADLQRVI		C1502	9	ATTVRPVFL		C1701	9	GLYEGLTWL
C0202	9	IAKHIDAEY		C0401	9	HFDADGNYF		C0403	9	LADERVLWL		C0501	9	IADSNPMVV		C0602	9	FVADRLRAV		C1502	9	ATVKIIQML		C1701	9	GQTSVVSFL
C0202	9	IAKKTTPLL		C0401	9	HFDASHVAL		C0403	9	LADEVITVF		C0501	9	IADTGANVV		C0602	9	FVFFLPRLI		C1502	9	ATVKRVNIL		C1701	9	GQVGHILEL
C0202	9	IAKSGTKAF		C0401	9	HFDASLSTY		C0403	9	LADFEAGLL		C0501	9	IADVAPSAI		C0602	9	FVFPGELLL		C1502	9	ATVPFLLQL		C1701	9	GQYPRALEL
C0202	9	IAKSGTSEF		C0401	9	HFDDFVTNL		C0403	9	LADGLKVVL		C0501	9	IAEAVRTTL		C0602	9	FVIETARQL		C1502	9	ATVPGLLKV		C1701	9	GQYSHLVLL
C0202	9	IASDIVSRF		C0401	9	HFDDIGPSV		C0403	9	LADGSIAVL		C0501	9	IAEDKTVVV		C0602	9	FVKDSIRLV		C1502	9	ATVPIRLII		C1701	9	GSDPRVTQL
C0202	9	IAVGHIYFF		C0401	9	HFDDTVVCL		C0403	9	LADIIATGF		C0501	9	IAEDPKVFL		C0602	9	FVNPSLRVL		C1502	9	ATVPKVTVI		C1701	9	GSDPSIISL
C0202	9	IAVGHIYYF		C0401	9	HFDETVNRY		C0403	9	LADIVATGF		C0501	9	IAEEKGLVV		C0602	9	FVRDMIREV		C1502	9	ATVPNALEF		C1701	9	GSSGGVIRL
C0202	9	IAVGIMSYY		C0401	9	HFDFIQSHI		C0403	9	LADLHPDVF		C0501	9	IAEETSSRL		C0602	9	FVSPLVKYL		C1502	9	ATVPNTIVV		C1701	9	GSTGTVAHL
C0202	9	IAVGTVIRY		C0401	9	HFDFQGCNF		C0403	9	LADLQLEYL		C0501	9	IAEGGASRF		C0602	9	FVTGIARYI		C1502	9	ATVQRLPEL		C1701	9	GSTRIITRL
C0202	9	IAYPKAVTM		C0401	9	HFDGFVVEV		C0403	9	LADNDEVKF		C0501	9	IAEGPETKI		C0602	9	FVTPHPRRI		C1502	9	ATVTQMHFL		C1701	9	GSVNRVTIL
C0202	9	IIAEPGRYY		C0401	9	HFDIVIRNL		C0403	9	LADNVPVTV		C0501	9	IAESKSPEM		C0602	9	FVVDHVIKI		C1502	9	ATVTSYLKL		C1701	9	GSVSDIIRL
C0202	9	IIAPPERKY		C0401	9	HFDLASTTI		C0403	9	LADPAVTDF		C0501	9	IGDEAATHL		C0602	9	FVYDEVRKL		C1502	9	ATVVTQLLV		C1701	9	GSVSNPLFL
C0202	9	IIHDFPQFY		C0401	9	HFDLFLRFL		C0403	9	LADPGIITI		C0501	9	IGDEGVSQL		C0602	9	FVYPWYRDV		C1502	9	ATYEDIVTL		C1701	9	GSYFRVTLL
C0202	9	IISSVIQKF		C0401	9	HFDLHEEML		C0403	9	LADPGPVNF		C0501	9	IGDGRSPEF		C0602	9	FYAELYHII		C1502	9	ATYHHIIRL		C1701	9	GSYGRKTVL
C0202	9	ILGPPGSVY		C0401	9	HFDLLHEDV		C0403	9	LADQGEIRV		C0501	9	IGDIHPSDL		C0602	9	FYATLVRYV		C1502	9	ATYHRAIKV		C1701	9	GTMGKPIKL
C0202	9	IQAGIFQEF		C0401	9	HFDLNLRQF		C0403	9	LADRNVTVL		C0501	9	IGDPNLEFV		C0602	9	FYHQLLREL		C1502	9	ATYIFLQTF		C1701	9	GTVDDVPKL
C0202	9	ISKALVAYY		C0401	9	HFDLSHGSA		C0403	9	LADSKEIFL		C0501	9	IGDSRPPSF		C0602	9	FYIDRGRQL		C1502	9	ATYLRFIIV		C1701	9	GTVEQIVYL
C0202	9	ISPVTKSSF		C0401	9	HFDLSVIEL		C0403	9	LADTQPAVL		C0501	9	IIDDGDSNL		C0602	9	FYIPQRPYM		C1502	9	ATYNFSQSL		C1701	9	GTYTLIIRL
C0202	9	ISTPVIRTF		C0401	9	HFDMNIISM		C0403	9	LALAFFAII		C0501	9	IIDDNHAIV		C0602	9	FYNERVVIM		C1502	9	ATYVFLHTV		C1701	9	GVIATIAFL
C0202	9	ITKVRTPVM		C0401	9	HFDNLFSKM		C0403	9	LAPNIISQL		C0501	9	IIDDPNLVV		C0602	9	FYNEYVREL		C1502	9	AVAQYALFL		C1701	9	GVSPEPIHL
C0202	9	IVKKPGNIY		C0401	9	HFDPEAPFL		C0403	9	LDEVAMGEM		C0501	9	IIDDSDSNL		C0602	9	FYVDTVRAF		C1502	9	AVFGVPLIV		C1701	9	GVVDHQTEL
C0202	9	KAADIASKV		C0401	9	HFDPEVVQI		C0403	9	LDTLVPAKF		C0501	9	IIDEKGPVM		C0602	9	FYVGQPRFL		C1502	9	AVFPHLTVV		C1701	9	HAAPQPQKL
C0202	9	KAAPCIYWL		C0401	9	HFDQMFQRF		C0403	9	LFDGSPTYV		C0501	9	IIDEVVNKF		C0602	9	FYVPFAKAL		C1502	9	AVGPVHNSV		C1701	9	HAGPVINTL
C0202	9	KACTIAIRY		C0401	9	HFDSPPHLL		C0403	9	LFDITGQDF		C0501	9	IIDGKIFCV		C0602	9	FYVPLPRHL		C1502	9	AVHNVPLSV		C1701	9	HAIFKLTYL
C0202	9	KAFARPWSL		C0401	9	HFDSRSVIF		C0403	9	LFDLVCHEF		C0501	9	IIDKEVSLM		C0602	9	GAFGEVRLV		C1502	9	AVIGNFLYV		C1701	9	HAIYWPAFL
C0202	9	KAFDFPSSF		C0401	9	HFDSYITCV		C0403	9	LFDPMTGTF		C0501	9	IIDKSGSTI		C0602	9	GFAGDDAPR		C1502	9	AVINRVQKV		C1701	9	HAMQFPAEL
C0202	9	KAFDRPSLF		C0401	9	HFDTIFEVF		C0403	9	LFDVQILNY		C0501	9	IIDKSGSTV		C0602	9	GQPDVVRLL		C1502	9	AVMKQFAFV		C1701	9	HASDRIIAL
C0202	9	KAFDYPSRF		C0401	9	HFDTPPHLF		C0403	9	LIDEPSAYL		C0501	9	IIDRAITSL		C0602	9	GRADALRVL		C1502	9	AVNDHVLKV		C1701	9	HASSSIVSL
C0202	9	KAFPFHIIF		C0401	9	HFDTPVQFL		C0403	9	LIDLPGTEL		C0501	9	IIDRTNTTL		C0602	9	GRAFIFPSY		C1502	9	AVNGKFVYV		C1701	9	HAVLLVTQL
C0202	9	KAFPGIISE		C0401	9	HFDVQSMLF		C0403	9	LIDQQVVYI		C0501	9	IIEADEVLL		C0602	9	GRAFLFNKV		C1502	9	AVNNFLLKV		C1701	9	HAVRQPVFL
C0202	9	KAGPIWDLR		C0401	9	HFDVVKCIL		C0403	9	LIPDDLSLL		C0501	9	IIEEHPPMI		C0602	9	GRAYLFNSV		C1502	9	AVNPHLFSL		C1701	9	HAYDREVHL
C0202	9	KAIELLQEF		C0401	9	HFDVVQLLV		C0403	9	LLDGGVINL		C0501	9	ILDEPTNHL		C0602	9	GRFFWIVRV		C1502	9	AVNPLLRVI		C1701	9	HIPDVITYL
C0202	9	KAISGVHTV		C0401	9	HFDYQSLLM		C0403	9	LLPDIISRL		C0501	9	ILDPHVVLL		C0602	9	GRFPQVQAF		C1502	9	AVTNMFLTV		C1701	9	HQAFSVVFL
C0202	9	KAITFVTQY		C0401	9	HFDYSPAGL		C0403	9	LLPERPSYL		C0501	9	ILLAIEEPV		C0602	9	GRIDIKQLI		C1502	9	AVVPKILTV		C1701	9	HQYDGLVEL
C0202	9	KAKEIYMTF		C0401	9	HFEELETIM		C0403	9	LRDEFLVKI		C0501	9	INDAGEVRL		C0602	9	GRIDRIIYV		C1502	9	CSSPHALVL		C1701	9	HSISIPTKL
C0202	9	KAMGIMNSF		C0401	9	HFHPSVALF		C0403	9	LSDEEIVKF		C0501	9	IQDEIRSVI		C0602	9	GRMVQVHEL		C1502	9	DIRGKLLQV		C1701	9	HSLSFETQL
C0202	9	KANPALYVL		C0401	9	HFITPVSTL		C0403	9	LSDGVVVQV		C0501	9	ISDAPVTGM		C0602	9	GRNPFVHEL		C1502	9	DTNADKQLS		C1701	9	HSPGAVSSL
C0202	9	KARGDLGAF		C0401	9	HFNPTGSAF		C0403	9	LSVMEEVLI		C0501	9	ISDDRLTVV		C0602	9	GRPEFVIKV		C1502	9	EALHYMLLV		C1701	9	HVYHHASML
C0202	9	KASDAFHFF		C0401	9	HFNVTNTTF		C0403	9	LTDDGRVFL		C0501	9	ISDEANSNF		C0602	9	GRPERQFFV		C1502	9	ENGIKPVYV		C1701	9	HVYSGVVNL
C0202	9	KATNVCTRF		C0401	9	HFPDMEIFL		C0403	9	LTDEDVVRL		C0501	9	ISDEGIAYL		C0602	9	GRPLFPHVL		C1502	9	ERTPHFALV		C1701	9	IAAGIFNDL
C0202	9	KAVSLFLCY		C0401	9	HFPGLASEL		C0403	9	LTDEGVVAL		C0501	9	ISDLAQHYL		C0602	9	GRPMNIQLV		C1502	9	ESIPIRLFL		C1701	9	IAAGLYLLL
C0202	9	KAYFDVKEY		C0401	9	HFSELLDEF		C0403	9	LTDHTVTFL		C0501	9	ISDLGQHTL		C0602	9	GRPVFVIRI		C1502	9	ESNHLLLMV		C1701	9	IAAKKVLRL
C0202	9	KAYGASKTF		C0401	9	HFSEQLLNL		C0403	9	LTDPAIVKV		C0501	9	ISDLSEHVF		C0602	9	GRPVYVTLI		C1502	9	ESNTIHLKV		C1701	9	IAAPFTSKL
C0202	9	KIKEIAVTV		C0401	9	HFWTWINHL		C0403	9	LTDPDIHVL		C0501	9	ISDLVKVTL		C0602	9	GRSLIINHL		C1502	9	ESNVQILKL		C1701	9	IADPNIAKL
C0202	9	KISNIIKQF		C0401	9	HFYEHLNQM		C0403	9	LTDPRLLYI		C0501	9	ISDPYNVNL		C0602	9	GRSPLIHAV		C1502	9	ESYGNPLRV		C1701	9	IAIGKVLKL
C0202	9	KLPDIFSVY		C0401	9	HFYYFVKEF		C0403	9	LTDQTPVLL		C0501	9	ISDSADCSL		C0602	9	GRTEILKWY		C1502	9	ETNPSILEV		C1701	9	IALEATQLL
C0202	9	KMKLNETSF		C0401	9	HGLIRKYGL		C0403	9	LTEALPVKL		C0501	9	ISDTQRISL		C0602	9	GRTSLTNLL		C1502	9	FADGHVLEL		C1701	9	IANPTATLL
C0202	9	KQAEIVKRL		C0401	9	HIDVITAEM		C0403	9	LTEEGVIKV		C0501	9	ISDYAVKIV		C0602	9	GRYPEAQSV		C1502	9	FADKHIQVL		C1701	9	IAPGVTHEL
C0202	9	KQFHRIVTY		C0401	9	HLDLIEAKF		C0403	9	LTEFGVIHL		C0501	9	ISDYTVTEI		C0602	9	GRYTGVRII		C1502	9	FAFRNFLYL		C1701	9	IAYSRPVYF
C0202	9	KQFPEVIKY		C0401	9	HLDPGPIYM		C0403	9	LTEQRIVFF		C0501	9	ITDLPSEVL		C0602	9	HAAPFQNIL		C1502	9	FAIDPHLLL		C1701	9	IGAGAPVYL
C0202	9	KSIARVLTV		C0401	9	HLPNKACFL		C0403	9	LVDLEPGTM		C0501	9	ITDPDVVHI		C0602	9	HAFLYIRQL		C1502	9	FAIKSLRKL		C1701	9	IGVGAVTML
C0202	9	KSSDIAKTF		C0401	9	HLPPFFDCL		C0403	9	LVEIVGCHF		C0501	9	ITDPEVVFV		C0602	9	HAPFTATSL		C1502	9	FALRVQQLV		C1701	9	IGYPITLYL
C0202	9	KSVDWLLVF		C0401	9	HMDTFIETF		C0403	9	LYDLVTEKM		C0501	9	ITDPSVIVM		C0602	9	HFPELVKII		C1502	9	FAMPYFIQV		C1701	9	IIFATPTKL
C0202	9	KTFDHYCEY		C0401	9	HTDLPVSVF		C0403	9	LYDPCTVMF		C0501	9	ITDSTGTHL		C0602	9	HFPGLASEL		C1502	9	FANNVQLSL		C1701	9	IITRVETYL
C0202	9	KTIDKKTFY		C0401	9	HWDGNMSLV		C0403	9	LYDPVISKL		C0501	9	ITSMLNPLI		C0602	9	HGFAGVILI		C1502	9	FASGLIHRV		C1701	9	ILDPHVVLL
C0202	9	KTPDFILQV		C0401	9	HWDPDILCL		C0403	9	LYDVVDVKY		C0501	9	IVDAVGTML		C0602	9	HGVAQVRFV		C1502	9	FASHVSPEV		C1701	9	ILYGKIIHL
C0202	9	KVANLVKAY		C0401	9	HWDPQEVTL		C0403	9	MADAGILRL		C0501	9	IVDDCGGAF		C0602	9	HHIPDVITY		C1502	9	FATGVWHQM		C1701	9	ISTNSHPIL
C0202	9	KVSSINSRF		C0401	9	HWDVTEAVF		C0403	9	MADIPGHVF		C0501	9	IVDDFGTHL		C0602	9	HLPDFVKQL		C1502	9	FAYKNVKFV		C1701	9	ISVGVINLL
C0202	9	KYFDEHYEY		C0401	9	HWDWKIALL		C0403	9	MADTFLEHM		C0501	9	IVDDPEGFF		C0602	9	HLPSHIRIL		C1502	9	FAYPAIRYL		C1701	9	ITSDQPILL
C0202	9	LAAGHLVQL		C0401	9	HWFVWVTQM		C0403	9	MFDIVGTHL		C0501	9	IVDEAIYYF		C0602	9	HLVDIVRSL		C1502	9	FAYPAPLEV		C1701	9	IVMEHVVFL
C0202	9	LAFPGEMLL		C0401	9	HWVDLLDRF		C0403	9	MIPTLPSIL		C0501	9	IVDEVNGLI		C0602	9	HQSGIVQLL		C1502	9	FAYRGFKYL		C1701	9	IVYPKPTWL
C0202	9	LAFSRALEL		C0401	9	HYDAICQYM		C0403	9	MLDPLEVHL		C0501	9	IVDGAVVKF		C0602	9	HRAVFPIYL		C1502	9	FAYTARISV		C1701	9	KAAEVYTRL
C0202	9	LAIKRCKHF		C0401	9	HYDAVEAEL		C0403	9	MTDDKITEV		C0501	9	IVDHQNDSF		C0602	9	HRFQTQQLL		C1502	9	FGNGFVLYV		C1701	9	KAASKVTLL
C0202	9	LAINHAYFY		C0401	9	HYDCVQILL		C0403	9	MTDPEMVEV		C0501	9	IVDIPGTSV		C0602	9	HRFVSVSKL		C1502	9	FGNVVELRI		C1701	9	KADGVPVYL
C0202	9	LAIYEPKTF		C0401	9	HYDEQQNFF		C0403	9	MTDPIRILV		C0501	9	IVDKNGRLV		C0602	9	HRFYMIQSF		C1502	9	FGQRHRLLL		C1701	9	KADSVVVLL
C0202	9	LAKDGVLTL		C0401	9	HYDHVLIEL		C0403	9	MTDVVAAFL		C0501	9	IVDKSGRTL		C0602	9	HRGDIVSLV		C1502	9	FGQRHRLVL		C1701	9	KAFAKKTYL
C0202	9	LAKEVGTSY		C0401	9	HYDIPKISM		C0403	9	MVDGKPVNL		C0501	9	IVDPQNQTM		C0602	9	HRLPHVLLL		C1502	9	FGTIVNIQV		C1701	9	KAFNHRSYL
C0202	9	LAKGGTVEY		C0401	9	HYDLAFTDV		C0403	9	MVDSKPVNL		C0501	9	IVDPVDSTL		C0602	9	HRNEVTVEL		C1502	9	FGTKWMMFL		C1701	9	KAFNTSSHL
C0202	9	LALIIMKIL		C0401	9	HYDLFIERF		C0403	9	NADAIVVKL		C0501	9	IVDQEGSLL		C0602	9	HRNPLPEYL		C1502	9	FINSRIITV		C1701	9	KAFPYSSHL
C0202	9	LANGDVWKV		C0401	9	HYDMNTASL		C0403	9	NADGKIISL		C0501	9	IVDRGSTNL		C0602	9	HRPEFSSCL		C1502	9	FLNKLVILV		C1701	9	KAFQHPSHL
C0202	9	LANKLITVY		C0401	9	HYDPAELKL		C0403	9	NADIAVVEM		C0501	9	IVDRPVTLV		C0602	9	HRPELVTKL		C1502	9	FLTAAKKAR		C1701	9	KAFQKIVVL
C0202	9	LARDFLDEY		C0401	9	HYDPATEEF		C0403	9	NADKLTVKF		C0501	9	IVDSARSIL		C0602	9	HRPESVVLV		C1502	9	FMNPHLISV		C1701	9	KAFSYPSKL
C0202	9	LARIIDSEY		C0401	9	HYDPDYEFL		C0403	9	NADPILISL		C0501	9	IVDTPCNEM		C0602	9	HRPGIVVDY		C1502	9	FNFFAPPEV		C1701	9	KALGHPAML
C0202	9	LARPLPVEY		C0401	9	HYDPMIAKL		C0403	9	NADPLEVML		C0501	9	KADDPYAHL		C0602	9	HRPVNVVNV		C1502	9	FNFFNPLKA		C1701	9	KAPGSTSNL
C0202	9	LASKEIHQF		C0401	9	HYDRFVIFL		C0403	9	NADPLGVLI		C0501	9	KADEDPALF		C0602	9	HRSPLVLAY		C1502	9	FNGAPVLYL		C1701	9	KATGKISKL
C0202	9	LASPIYTHF		C0401	9	HYDVQSILF		C0403	9	NADPQAVTM		C0501	9	KADEGLASL		C0602	9	HRYEVVTEL		C1502	9	FNHPNILRL		C1701	9	KAVASVARL
C0202	9	LASSLLDRF		C0401	9	HYEGAVVIL		C0403	9	NADVALVNF		C0501	9	KADGKIMAL		C0602	9	HRYPNQVYY		C1502	9	FNIDKAREI		C1701	9	KAVGTITKL
C0202	9	LASYVHYVF		C0401	9	HYIYPPAIV		C0403	9	NAYTGIVLL		C0501	9	KADGVPVYL		C0602	9	HYIDIERKL		C1502	9	FNIDRLQEL		C1701	9	KAYELALYL
C0202	9	LATASSPKF		C0401	9	HYWTWINHF		C0403	9	NFDDIKNGL		C0501	9	KADIIVSEL		C0602	9	HYIDRVRAL		C1502	9	FNIEKGRLV		C1701	9	KAYERGISL
C0202	9	LAVPFCVNF		C0401	9	IADGLPVAV		C0403	9	NFDFTRSYL		C0501	9	KADIPSVAF		C0602	9	HYIDVARLL		C1502	9	FNLSRIVTL		C1701	9	KAYVRVLDL
C0202	9	LAYIHLIEF		C0401	9	IADLVVAVF		C0403	9	NFDLTKNYL		C0501	9	KADLESESF		C0602	9	HYSEKLREL		C1502	9	FNNGWMIKI		C1701	9	KAYYKSSHL
C0202	9	LHYPIDSLT		C0401	9	IADPNIAKL		C0403	9	NFDNILNSF		C0501	9	KADMNVHLL		C0602	9	IAFEFPVLV		C1502	9	FNQERIVDV		C1701	9	KIPNFCVLL
C0202	9	LIYGRPVYV		C0401	9	ICDELIAKL		C0403	9	NFDTIDQQF		C0501	9	KADMTCRGF		C0602	9	IAFPTSISV		C1502	9	FNQKFFQEL		C1701	9	KIYEEPIIL
C0202	9	LLADITSKY		C0401	9	IFAPYVDIF		C0403	9	NIDIDPVYL		C0501	9	KADNVGSAL		C0602	9	IAFSRPVKY		C1502	9	FNRWFAEKF		C1701	9	KQYGNEVFL
C0202	9	LLKSPGACF		C0401	9	IFCESLRNF		C0403	9	NIDVVGVSF		C0501	9	KADPQGPEL		C0602	9	IAINISRNL		C1502	9	FNSKQLLYL		C1701	9	KSDPSIVRL
C0202	9	LREDGALSI		C0401	9	IFDANESGF		C0403	9	NTDEPPMVF		C0501	9	KADSDGPEF		C0602	9	IAIPFLIKL		C1502	9	FNSNVMVKV		C1701	9	KSIKNVTEL
C0202	9	LSAPIHTQM		C0401	9	IFDAVGFTF		C0403	9	NTDPECYWL		C0501	9	KADSINKPF		C0602	9	IASAIVNEL		C1502	9	FNSPRNLAM		C1701	9	KSTSNITKL
C0202	9	LSAPIMSRF		C0401	9	IFDAVLKGV		C0403	9	NVDAAVVLL		C0501	9	KADSVVVLL		C0602	9	IASTILRLI		C1502	9	FNTASALHL		C1701	9	KTPNFSTLL
C0202	9	LSFPTTKTY		C0401	9	IFDCVSQEY		C0403	9	NVDSLITRL		C0501	9	KADTEEEFL		C0602	9	IAVHVVRVL		C1502	9	FNTWKPMWV		C1701	9	LAAFVPLLL
C0202	9	LSFTHPISF		C0401	9	IFDDPLNAF		C0403	9	NYDEALRLL		C0501	9	KADVEEEFL		C0602	9	IAVSIVRAL		C1502	9	FNVPAFLTV		C1701	9	LAAGHLVQL
C0202	9	LSGSYVVYT		C0401	9	IFDEAALEV		C0403	9	NYDFGPIHM		C0501	9	KADVEGELL		C0602	9	IERVTLPYL		C1502	9	FNWGRVVAL		C1701	9	LAAHIPLFL
C0202	9	LSKDDIENM		C0401	9	IFDEFRTVL		C0403	9	NYDLALKYF		C0501	9	KADVVISAF		C0602	9	IFPEFLKEL		C1502	9	FNYKSILIV		C1701	9	LAAKKAVWL
C0202	9	LSKDSILSL		C0401	9	IFDEILVNA		C0403	9	PIRLLAAAA		C0501	9	KADVVPVTL		C0602	9	IGYGHVRAV		C1502	9	FQDPVPLTV		C1701	9	LAAPQLIML
C0202	9	LSKGPGLEV		C0401	9	IFDEMKKKF		C0403	9	PTSAVITTI		C0501	9	KAEEPPSQL		C0602	9	IHPDIFPLL		C1502	9	FQIGKMRYV		C1701	9	LAAPVISVL
C0202	9	LSNTVMPRF		C0401	9	IFDEVMGCF		C0403	9	QADEVIAIL		C0501	9	KAEEVVSFV		C0602	9	IHSPVVNEL		C1502	9	FQNDFLRLL		C1701	9	LAARLVTFL
C0202	9	LTDAIYDII		C0401	9	IFDGFIVSL		C0403	9	QADGRVVLV		C0501	9	KAEGSEIRL		C0602	9	IHVDFPVIL		C1502	9	FQNIRPLFI		C1701	9	LAASVFTCL
C0202	9	LTFPHPVYY		C0401	9	IFDGLLEYL		C0403	9	QIPEIKQTL		C0501	9	KGDPVIYSL		C0602	9	IIFEQIRFV		C1502	9	FQNLKVLLV		C1701	9	LADKNVPNL
C0202	9	MAFGKPAKY		C0401	9	IFDGNVAHI		C0403	9	QKADIEEIK		C0501	9	KHLDVVTLL		C0602	9	IIINHVISV		C1502	9	FQNVKQLYA		C1701	9	LADSKEIFL
C0202	9	MASKILKSY		C0401	9	IFDIIDREA		C0403	9	QLDPLVVEL		C0501	9	KIDDKPVKI		C0602	9	IITAFIRAL		C1502	9	FQYPDTRYL		C1701	9	LAFEGPILL
C0202	9	MAYGGKLKY		C0401	9	IFDIPGRLY		C0403	9	QLPEQPLFL		C0501	9	KIDEKTAEL		C0602	9	IITDLLRSV		C1502	9	FSAGTFLYV		C1701	9	LAFPGEMLL
C0202	9	MAYGHIDSY		C0401	9	IFDKIHSLL		C0403	9	QTDHTPVHL		C0501	9	KLDETGNSL		C0602	9	IIVDLARYV		C1502	9	FSALRFLVV		C1701	9	LAFPSPEKL
C0202	9	MSKAPSNTF		C0401	9	IFDLFLECM		C0403	9	QTDVGITHF		C0501	9	KLDHVVTII		C0602	9	ILAEIARIL		C1502	9	FSAPSALRV		C1701	9	LAFSRALEL
C0202	9	MTKKPGMFF		C0401	9	IFDLGGGTF		C0403	9	QWDLVENYL		C0501	9	KLDVGNAEV		C0602	9	ILPDDPRQM		C1502	9	FSEGGERLL		C1701	9	LAFSRPSQL
C0202	9	NAAAIYDLL		C0401	9	IFDLMDAKA		C0403	9	RADAPVALV		C0501	9	KNDEGVTLL		C0602	9	ILPGFQRTV		C1502	9	FSEPFHLIV		C1701	9	LAIASGIYL
C0202	9	NADPNMKLF		C0401	9	IFDLPRTNI		C0403	9	RFDCAIVLL		C0501	9	KNDIPSSYM		C0602	9	ILPKWLRFI		C1502	9	FSESHLVII		C1701	9	LAIFVICQL
C0202	9	NASPVISSV		C0401	9	IFDLQKTSL		C0403	9	RFDGRVVLV		C0501	9	KQDPYLVNF		C0602	9	ILPQRIREL		C1502	9	FSFHHVLSL		C1701	9	LAITDEILL
C0202	9	NATGVAMLF		C0401	9	IFDLQNKVL		C0403	9	RFDPLGHYL		C0501	9	KSDDLVVDV		C0602	9	ILPSSIKEL		C1502	9	FSFKKPFKL		C1701	9	LALLHLLYL
C0202	9	NAVNLAIKY		C0401	9	IFDLSCMGF		C0403	9	RFDYTNSEF		C0501	9	KSDERLTAF		C0602	9	ILPTLVRLL		C1502	9	FSFKKSFKL		C1701	9	LALLLPVFL
C0202	9	NAYAKVCLY		C0401	9	IFDNCHELY		C0403	9	RLPPTPLLL		C0501	9	KSDERPVHI		C0602	9	ILPWYPKVL		C1502	9	FSFQRPLLV		C1701	9	LASSYIAHL
C0202	9	NQIPFIIQY		C0401	9	IFDNSDNRL		C0403	9	RTDCSPIQF		C0501	9	KSDEVTQEI		C0602	9	ILSGVIRSV		C1502	9	FSFYFHEAL		C1701	9	LATASSPKF
C0202	9	NTIPFIIRY		C0401	9	IFDNTFSRF		C0403	9	RTDDKVIRF		C0501	9	KSDHPGISI		C0602	9	ILTEIYRIV		C1502	9	FSHAQTVVL		C1701	9	LATRAIPEL
C0202	9	PPKYAKTLY		C0401	9	IFDNWIPLL		C0403	9	RTDDTPVVL		C0501	9	KSDPSIVRL		C0602	9	IPGVRSVVL		C1502	9	FSHGQVVSL		C1701	9	LATRSFPQL
C0202	9	PSIVHRKCF		C0401	9	IFDPLEIIL		C0403	9	RTDEIGVAF		C0501	9	KSDQALHSF		C0602	9	IPSRLPLLL		C1502	9	FSHTVNLIV		C1701	9	LAVAHPLLL
C0202	9	QAASILTKF		C0401	9	IFDPNILTI		C0403	9	RTDGKVFQF		C0501	9	KSDSPAIQL		C0602	9	IQPDNIVYV		C1502	9	FSIDPDLLV		C1701	9	LAVLHTVLL
C0202	9	QAERIFSEV		C0401	9	IFDPSPEDI		C0403	9	RTDPIPIVV		C0501	9	KTDGSVVKL		C0602	9	IQYIRPVFV		C1502	9	FSIDRALNV		C1701	9	LAVRVVTLL
C0202	9	QAIQWILHY		C0401	9	IFDPTRECM		C0403	9	RTDPVPVTI		C0501	9	KTDTGIVTV		C0602	9	IRAAWTRAL		C1502	9	FSIEPWLKV		C1701	9	LAYEKIAYL
C0202	9	QAMGKTSFF		C0401	9	IFDPVKQQF		C0403	9	RTDSEIALL		C0501	9	KTDVTVVRF		C0602	9	IRADLTHLL		C1502	9	FSIKHPHTL		C1701	9	LAYHLAVVL
C0202	9	QAPQPQSSL		C0401	9	IFDQSGTYL		C0403	9	RTDVPGELL		C0501	9	KTDVVVNSV		C0602	9	IRAEPLNSV		C1502	9	FSIKKIRFL		C1701	9	LAYIHLIEF
C0202	9	QAYSGIQQY		C0401	9	IFDRAVAAY		C0403	9	RYDLGGLVM		C0501	9	KVDEAVAVL		C0602	9	IRAERDILV		C1502	9	FSIKKTKQL		C1701	9	LAYPFQSLL
C0202	9	QSTTRLTEM		C0401	9	IFDRVLTEL		C0403	9	SADDKTVRL		C0501	9	KVDELTTEI		C0602	9	IRASALRVL		C1502	9	FSIKMFLTV		C1701	9	LAYSEPCGL
C0202	9	RAAKKLWKV		C0401	9	IFDSIIVTL		C0403	9	SADELVTRI		C0501	9	LADAINTEF		C0602	9	IRASLYNAV		C1502	9	FSINVGHMV		C1701	9	LAYTGFVKL
C0202	9	RAAPFSLEY		C0401	9	IFDSKTVSI		C0403	9	SADEPMTTF		C0501	9	LADCKASEV		C0602	9	IRDDHIRFI		C1502	9	FSIPDSLLI		C1701	9	LAYYGFTKL
C0202	9	RAFASATNY		C0401	9	IFDSKVTEI		C0403	9	SADEVQRFF		C0501	9	LADDSVRSL		C0602	9	IRFPDILRV		C1502	9	FSIPILMQL		C1701	9	LGTAFMLWL
C0202	9	RAFDVPKRY		C0401	9	IFDSSDLSF		C0403	9	SADFETVRM		C0501	9	LADEAEVHL		C0602	9	IRFPMQRNL		C1502	9	FSIPVVSDV		C1701	9	LISKIPHIL
C0202	9	RAFEYEIRF		C0401	9	IFDSTAVLL		C0403	9	SADFPALVV		C0501	9	LADEKVETV		C0602	9	IRGSKIRFL		C1502	9	FSIRYQYLL		C1701	9	LIYGRPVYV
C0202	9	RAFGIPIRV		C0401	9	IFDVASIIL		C0403	9	SADFSPAFL		C0501	9	LADERNELL		C0602	9	IRGSTIKYL		C1502	9	FSITPLSEL		C1701	9	LQYSFPLQL
C0202	9	RAFPLPMSF		C0401	9	IFDVHVHEV		C0403	9	SADHPVIKV		C0501	9	LADEVITVF		C0602	9	IRHDVIVSI		C1502	9	FSKTEELNR		C1701	9	LSDTRTRYL
C0202	9	RAFPNKQGY		C0401	9	IFDVLPNFF		C0403	9	SADISLERL		C0501	9	LADGADEHL		C0602	9	IRHPNIITL		C1502	9	FSLDLVHTL		C1701	9	LTDQTLIYL
C0202	9	RAGPTAVYF		C0401	9	IFDWLGRSL		C0403	9	SADKFQVLL		C0501	9	LADGLKVVL		C0602	9	IRIRVVQML		C1502	9	FSLDNARQV		C1701	9	LTPYRVIFL
C0202	9	RAIDKCWKI		C0401	9	IFDWVEANL		C0403	9	SADPEVMLL		C0501	9	LADGVPVAL		C0602	9	IRKAEIIKL		C1502	9	FSLGVPRLI		C1701	9	LVIGRVLEL
C0202	9	RAIEIYTDM		C0401	9	IFEDKTVKL		C0403	9	SADPLGAWL		C0501	9	LADHAARQL		C0602	9	IRLEKVLLV		C1502	9	FSNAGILKM		C1701	9	LVTHLVTKL
C0202	9	RAIGILSRF		C0401	9	IFEVADTHL		C0403	9	SADPNVVDL		C0501	9	LADHPDAPM		C0602	9	IRLPETIDL		C1502	9	FSNDIPHVV		C1701	9	MADPNIRFL
C0202	9	RAINIALQL		C0401	9	IFHHFAPLL		C0403	9	SADPRHILL		C0501	9	LADIAQSQL		C0602	9	IRMEHVKIV		C1502	9	FSNGHIKVL		C1701	9	MAINSISKL
C0202	9	RAIRPPRHF		C0401	9	IFMEDTACF		C0403	9	SADRFVTLL		C0501	9	LADKGEIRV		C0602	9	IRNDYINWV		C1502	9	FSNPETLDL		C1701	9	MANGAVIHL
C0202	9	RAITETHAF		C0401	9	IFMLCTLVL		C0403	9	SADSKVLLF		C0501	9	LADKNSELF		C0602	9	IRNDYYLNL		C1502	9	FSNPNIQKI		C1701	9	MAPHWAVWL
C0202	9	RAKEYLEFF		C0401	9	IFPEPVAFL		C0403	9	SADSRIVKM		C0501	9	LADKNVPNL		C0602	9	IRNILLHQL		C1502	9	FSNPRALYL		C1701	9	MAVRLVTEL
C0202	9	RAKQPPSTF		C0401	9	IFPNQTEEL		C0403	9	SADTVVIFD		C0501	9	LADLHPDVF		C0602	9	IRNQIIREL		C1502	9	FSNVFEHYL		C1701	9	MAYARQIYI
C0202	9	RAMFHDKKF		C0401	9	IFSEKPVFV		C0403	9	SADVAAVVM		C0501	9	LADLQNDEV		C0602	9	IRPDINVDV		C1502	9	FSNVMIHVV		C1701	9	NADPIAKYL
C0202	9	RARELLVSY		C0401	9	IFSPNVVNL		C0403	9	SADVKEVLL		C0501	9	LADMHSTEI		C0602	9	IRPDIVNFV		C1502	9	FSQKSFLVL		C1701	9	NAFSGVMML
C0202	9	RARYLAEKY		C0401	9	IFSPSVEDF		C0403	9	SAPKYIDYL		C0501	9	LADNDEVKF		C0602	9	IRPDRQTLM		C1502	9	FSQPRHISV		C1701	9	NASEHIVYL
C0202	9	RASLLLKTY		C0401	9	IFTPIVEHL		C0403	9	SFDAHLTEL		C0501	9	LADQGEIRV		C0602	9	IRPEHVLRL		C1502	9	FSQRTSLIV		C1701	9	NATIRVTNL
C0202	9	RASPVNDIF		C0401	9	IFWFFREAF		C0403	9	SFDCIQQTF		C0501	9	LADQMISRI		C0602	9	IRPENVIIY		C1502	9	FSREEFPTL		C1701	9	NAVCKLTYL
C0202	9	RASWIAQVF		C0401	9	IHDGLTVHL		C0403	9	SFDEIHQLF		C0501	9	LADRNVTVL		C0602	9	IRPEYAWIV		C1502	9	FSSDFTLKI		C1701	9	NAVSQITRM
C0202	9	RATPHPSEL		C0401	9	IHDLLTIFV		C0403	9	SFDETCTRF		C0501	9	LADSKEIFL		C0602	9	IRPGLTTVL		C1502	9	FSSDVTHEM		C1701	9	NAVSVHSNL
C0202	9	RAYAKALHY		C0401	9	IIDEQPLIF		C0403	9	SFDETVTHF		C0501	9	LADSVGHHL		C0602	9	IRPLIVALI		C1502	9	FSSHILVVV		C1701	9	NAYTGIVLL
C0202	9	RAYAKDVKF		C0401	9	ILDCQFSEF		C0403	9	SFDGIIAMM		C0501	9	LADVDPMQL		C0602	9	IRPNIILVL		C1502	9	FSSPHLVQV		C1701	9	NVPVRDIPA
C0202	9	RAYGRDIVE		C0401	9	ILDDTVQRF		C0403	9	SFDIQLTSV		C0501	9	LADVMSEQL		C0602	9	IRPQMQQIL		C1502	9	FSSSYITAI		C1701	9	PLYARPIFL
C0202	9	RAYPAAITI		C0401	9	ILDLVISCF		C0403	9	SFDLAKVLL		C0501	9	LAEAGVAVF		C0602	9	IRPVSASFL		C1502	9	FSSWVQLEV		C1701	9	QAFPRITQL
C0202	9	RAYPTVKFY		C0401	9	ILDNPVVQL		C0403	9	SFDTGFTSF		C0501	9	LAEDPKVTL		C0602	9	IRQGKITEL		C1502	9	FSTASIMHL		C1701	9	QAITALAHL
C0202	9	RIADISQVY		C0401	9	ILDNSPAFL		C0403	9	SFDVADRMF		C0501	9	LAEDTRTEL		C0602	9	IRRDYLHYI		C1502	9	FSTLFLETV		C1701	9	QASHQPLYL
C0202	9	RIHFPLATY		C0401	9	ILDPCIYRV		C0403	9	SFEEKPVYI		C0501	9	LAEIAKVEL		C0602	9	IRSLILNNI		C1502	9	FSTSLVHSI		C1701	9	QSAPAPVML
C0202	9	RIKAINTFF		C0401	9	ILDPHVVLL		C0403	9	SIDDLPTVL		C0501	9	LAEKSTVHM		C0602	9	IRSSYIRVL		C1502	9	FSTTVIQNV		C1701	9	QSIAFISRL
C0202	9	RISGVDRYY		C0401	9	ILDRHLAIL		C0403	9	SIDRNPPQL		C0501	9	LGDDPTSSF		C0602	9	IRSVELQLV		C1502	9	FSTVVIHFL		C1701	9	QSYGNVVEL
C0202	9	RLSKLIKKF		C0401	9	ILDVASLEV		C0403	9	SIPDFPMHL		C0501	9	LIDEPSAYL		C0602	9	IRTESIRWL		C1502	9	FSVGGLLKL		C1701	9	QTIALITYL
C0202	9	RQADFVQVL		C0401	9	ILDVIVRSF		C0403	9	SIPERPAQL		C0501	9	LIDKPNLQF		C0602	9	IRTGLVRLL		C1502	9	FSVNLFRTL		C1701	9	QTYFFPIHL
C0202	9	RQADKVWRL		C0401	9	ILPEYADIF		C0403	9	SIPGGPVRL		C0501	9	LIDLPGTEL		C0602	9	IRVGKIITV		C1502	9	FSVPVKQEV		C1701	9	RAADVLVYL
C0202	9	RQIDFVLSY		C0401	9	ILPGFIDFI		C0403	9	SLPDIPAHL		C0501	9	LIFKPDLTL		C0602	9	IRVGWEQLL		C1502	9	FSVVPSPKV		C1701	9	RAAPHRISL
C0202	9	RQIKHMIKY		C0401	9	IMDATNILV		C0403	9	SMDPLPVFL		C0501	9	LLDGGVINL		C0602	9	IRVPFLRQV		C1502	9	FSWKGINFV		C1701	9	RAAPPPLFL
C0202	9	RQINWTVLY		C0401	9	IMDVSLRSF		C0403	9	SSDPKVLTL		C0501	9	LLDSSHSEL		C0602	9	IRYIDNQVV		C1502	9	FSYAFPKAV		C1701	9	RAASKTVRL
C0202	9	RQTTITSHF		C0401	9	ISDEGIAYL		C0403	9	STDDFFAGL		C0501	9	LLDVPTAAV		C0602	9	IRYPDSHQL		C1502	9	FSYKDFDTL		C1701	9	RAFDHVLHL
C0202	9	RQYAKDIGF		C0401	9	ISDHYPVEV		C0403	9	STDMDKVLL		C0501	9	LSDEEIVKF		C0602	9	ISAELIRSL		C1502	9	FTAKFPLYM		C1701	9	RALDHYLTL
C0202	9	RQYPEVIKY		C0401	9	ITDFHPDTW		C0403	9	STDNGRIFL		C0501	9	LSDEHAGVI		C0602	9	ISAPLVKTL		C1502	9	FTAWRILEV		C1701	9	RALEHFTDL
C0202	9	RSSGRVYYF		C0401	9	ITDHLIAML		C0403	9	STDQVGEFF		C0501	9	LSDGVVVQV		C0602	9	ISFPDPKML		C1502	9	FTEKSGRLL		C1701	9	RAMKHPLGL
C0202	9	RTFGHLLRY		C0401	9	ITDPDVVHI		C0403	9	STDVHIINL		C0501	9	LSDKDPPKL		C0602	9	ISTPVIRTF		C1502	9	FTFKRIGYL		C1701	9	RAQGRVLRL
C0202	9	RTMEIESTF		C0401	9	ITDPEVVFV		C0403	9	STDYETHEF		C0501	9	LSDLALHFL		C0602	9	ITAEILREL		C1502	9	FTHDWMVFV		C1701	9	RATPHPSEL
C0202	9	RTVEKTWKL		C0401	9	ITDPRTVFV		C0403	9	SVDDHIVRF		C0501	9	LSDLCGTVM		C0602	9	ITAGLIHWI		C1502	9	FTHLYTLIV		C1701	9	RAVGVQNYL
C0202	9	RVFPSPMRI		C0401	9	ITDPSVIVM		C0403	9	SVEDAAILL		C0501	9	LSDLTGSLL		C0602	9	ITFPGIKLI		C1502	9	FTHSQFIVV		C1701	9	RAVHILTKL
C0202	9	RVFPYSVFY		C0401	9	ITDVQLAIF		C0403	9	SVPDEIILL		C0501	9	LSDPIVNTL		C0602	9	ITFPGLHEL		C1502	9	FTIFKAMMV		C1701	9	RAVNDYPSL
C0202	9	RVKEIGSTM		C0401	9	ITSMLNPLI		C0403	9	SYDSKLVWF		C0501	9	LSDPQVHTV		C0602	9	ITKGFPVLL		C1502	9	FTIFRTISV		C1701	9	RAYDGTTYL
C0202	9	RVKEIYNTY		C0401	9	IVDEAIYYF		C0403	9	TADAFIVRF		C0501	9	LSDRKKVTL		C0602	9	ITRSIINII		C1502	9	FTISDPKLV		C1701	9	RAYQCVVLL
C0202	9	RVQGFQVEY		C0401	9	IVDGAVVKF		C0403	9	TADAIARKL		C0501	9	LSEQGDVKL		C0602	9	ITSASVRLV		C1502	9	FTKTEELNR		C1701	9	RAYTSETYL
C0202	9	RVVDIYSKF		C0401	9	IVDGRVYYI		C0403	9	TADDFLVFL		C0501	9	LTDDGRVFL		C0602	9	ITTTVTRVL		C1502	9	FTLKKLLLL		C1701	9	RIPSFVTEL
C0202	9	RVYPQAVYF		C0401	9	IVDLPVHQL		C0403	9	TADDPSLSL		C0501	9	LTDHGDVKL		C0602	9	ITVALPRLV		C1502	9	FTLKTVLMI		C1701	9	RISNPPILL
C0202	9	SAAAVFSHF		C0401	9	IWDETPLYF		C0403	9	TADEVHYFL		C0501	9	LTDLPSPSF		C0602	9	IVIDHLRSL		C1502	9	FTLSHITQL		C1701	9	RIYGNKTEL
C0202	9	SAADFFSHY		C0401	9	IWDFVSGSF		C0403	9	TADGRVVKL		C0501	9	LTDPAIVKV		C0602	9	IVIGIIKTV		C1502	9	FTMKTVLML		C1701	9	RIYQKKTQL
C0202	9	SAAFAVKLF		C0401	9	IWDLLKNAI		C0403	9	TADIGCVLV		C0501	9	LTEEGVIKV		C0602	9	IVINHVISV		C1502	9	FTNDKIINL		C1701	9	RSHYSPIYL
C0202	9	SAANIQPIF		C0401	9	IWDLTTATL		C0403	9	TADISDVWL		C0501	9	LVDGPCTQV		C0602	9	IYQSKVREL		C1502	9	FTNGQTVNL		C1701	9	RSLPFPTVL
C0202	9	SAAPFAQRY		C0401	9	IWDMGLELF		C0403	9	TADIVINLL		C0501	9	LVDKDSTFL		C0602	9	KAAVMVHQL		C1502	9	FTNRTVLEL		C1701	9	RSYWKEVLL
C0202	9	SAAPFFVLF		C0401	9	IWDPVLSVM		C0403	9	TFDDIVHSF		C0501	9	MADEAGLDL		C0602	9	KAMELIREL		C1502	9	FTNTIKLIV		C1701	9	RTIGVITKL
C0202	9	SAAQPGVAF		C0401	9	IWDRAITTL		C0403	9	TFDDVAVTF		C0501	9	MADKCSPTL		C0602	9	KATNVVRLL		C1502	9	FTQKNILLV		C1701	9	RVVDLITNL
C0202	9	SAASEQHVF		C0401	9	IWDVSVNSV		C0403	9	TFDEVLELM		C0501	9	MADPEVQQI		C0602	9	KAVDIVKQV		C1502	9	FTRKGVLRV		C1701	9	RVVDNPIYL
C0202	9	SAASICAKV		C0401	9	IWDVTILEY		C0403	9	TFDFVHNVM		C0501	9	MADRGEARL		C0602	9	KAYPKRPLL		C1502	9	FTSDIALRL		C1701	9	RVYPKCTWL
C0202	9	SAASITPLL		C0401	9	IWDWKTTKL		C0403	9	TFDLQRIGF		C0501	9	MADSGHYCV		C0602	9	KEEVVTVET		C1502	9	FTSPFCLQV		C1701	9	SAAASPVHL
C0202	9	SAASLTSKY		C0401	9	IWDYHVVLL		C0403	9	TFDLTVVSY		C0501	9	MADTFLEHM		C0602	9	KKINWIVQY		C1502	9	FTTSNIRKV		C1701	9	SAAGLPVCL
C0202	9	SAASLYPVL		C0401	9	IWEEWPLLI		C0403	9	TFDNVTSYL		C0501	9	MIDRDNSVF		C0602	9	KKPELVISY		C1502	9	FTVDQIRAI		C1701	9	SAAGVLIKL
C0202	9	SACGHTAVL		C0401	9	IWEPLAVKL		C0403	9	TIDCGLVRL		C0501	9	MLDEPTNHL		C0602	9	KKPEWVILI		C1502	9	FTVKLRLLV		C1701	9	SAALSCTFL
C0202	9	SACGKTFRY		C0401	9	IWEQYTVTL		C0403	9	TIEDAIAVL		C0501	9	MLDPLEVHL		C0602	9	KKPNFILLL		C1502	9	FTYHHIQEI		C1701	9	SAAMGGILL
C0202	9	SACIKVTKY		C0401	9	IWPLHPSLL		C0403	9	TIEDGIFEV		C0501	9	MPDSAAALL		C0602	9	KKPNLILNV		C1502	9	FTYKGLRAL		C1701	9	SAAMVFSAL
C0202	9	SACKNILRF		C0401	9	IWQAYLDYL		C0403	9	TIPITPAFL		C0501	9	MTDDKITEV		C0602	9	KKYPFILEV		C1502	9	FTYNPFMRV		C1701	9	SAAPGTASL
C0202	9	SACPFSSKF		C0401	9	IYDDCIVTV		C0403	9	TSDGRVIFF		C0501	9	MTDDKTTKI		C0602	9	KLASYVKFY		C1502	9	FVNDYILYY		C1701	9	SAAPRTVAL
C0202	9	SADEVQRFF		C0401	9	IYDDGITSL		C0403	9	TSDPAEVLV		C0501	9	MTDEKTTKI		C0602	9	KLPAFVRVV		C1502	9	GANEVLLVV		C1701	9	SAAPSPAAL
C0202	9	SAFGQIYKV		C0401	9	IYDEAISSF		C0403	9	TSDPLELFL		C0501	9	MTDPEMVEV		C0602	9	KLPDLERLL		C1502	9	GAQLHQLVL		C1701	9	SAAPSPQKL
C0202	9	SAFGRALRY		C0401	9	IYDEDEVLL		C0403	9	TSDYLVVYL		C0501	9	MVDDRLVTM		C0602	9	KLPEFSRKL		C1502	9	GAYKYIQEL		C1701	9	SAAPTFLLL
C0202	9	SAFNLLMHY		C0401	9	IYDEVVKLL		C0403	9	TSPSYIDKL		C0501	9	MVDGKPVNL		C0602	9	KQAEIVKRL		C1502	9	GAYTKILEV		C1701	9	SAAPVAHLL
C0202	9	SAFPFPVTV		C0401	9	IYDFIGEFM		C0403	9	TTDGYLLRL		C0501	9	MVDPFHTLF		C0602	9	KQFPEVIKY		C1502	9	GIMDRFLQV		C1701	9	SAATKIVFL
C0202	9	SAFPSNIFY		C0401	9	IYDFTDTVI		C0403	9	TTDPMLAYL		C0501	9	MVDSKPVNL		C0602	9	KRAAILTKL		C1502	9	GINPHVLQI		C1701	9	SACDGIFHL
C0202	9	SAFPYAHRF		C0401	9	IYDIAWCQL		C0403	9	TTEGIPVLI		C0501	9	NADAIVVKL		C0602	9	KRAAVPRFV		C1502	9	GIYTGFIKV		C1701	9	SACGHTAVL
C0202	9	SAFSGPYKF		C0401	9	IYDICRRNL		C0403	9	TTEMMPVYL		C0501	9	NADGKIISL		C0602	9	KRAEEILRL		C1502	9	GKELPILQV		C1701	9	SADKFQVLL
C0202	9	SAFSRIMKL		C0401	9	IYDIMNELM		C0403	9	TVDDLLSLK		C0501	9	NADIAVVEM		C0602	9	KRAITVQEI		C1502	9	GLNTIPLFV		C1701	9	SADPEARRL
C0202	9	SAFTNRIFF		C0401	9	IYDIVRNSW		C0403	9	TVPVRLSSL		C0501	9	NADISGMKV		C0602	9	KRFSGTVRL		C1502	9	GNFFSPKVV		C1701	9	SADPNVVDL
C0202	9	SAFYDSELF		C0401	9	IYDKCITEL		C0403	9	VADAIRTSL		C0501	9	NADKIRVKI		C0602	9	KRIDIIHNL		C1502	9	GNSGHFTII		C1701	9	SADPRHILL
C0202	9	SAHAGTYEV		C0401	9	IYDKFIAQL		C0403	9	VADALILRV		C0501	9	NADKLTVKF		C0602	9	KRNDYVHAL		C1502	9	GSDPRVTQL		C1701	9	SADSRIAEL
C0202	9	SAHNLQSVF		C0401	9	IYDKTSVLF		C0403	9	VADDPIVMV		C0501	9	NADLRPSKL		C0602	9	KRNELVIRV		C1502	9	GSFGKAILV		C1701	9	SAFGGAARL
C0202	9	SAIASTKVM		C0401	9	IYDLATQTL		C0403	9	VADDTPVLL		C0501	9	NADPILISL		C0602	9	KRPEIISTV		C1502	9	GSFGKVFLV		C1701	9	SAFLHAIRL
C0202	9	SAIGKILKF		C0401	9	IYDLFQKSF		C0403	9	VADEGICYL		C0501	9	NADPQAVTM		C0602	9	KRPSSVKVF		C1502	9	GSFGRVMLV		C1701	9	SAFLSAIFL
C0202	9	SAIPHPLIM		C0401	9	IYDLHESTY		C0403	9	VADELVAEF		C0501	9	NADSATRLL		C0602	9	KRPVIVKVL		C1502	9	GSFHFDYEV		C1701	9	SAFNEITKL
C0202	9	SAITKPWEV		C0401	9	IYDLLDTAM		C0403	9	VADELVSEF		C0501	9	NADSSNTAL		C0602	9	KRSELVNWY		C1502	9	GSIPRSLEV		C1701	9	SAFRGVGLL
C0202	9	SAKFASCFY		C0401	9	IYDLVDRHL		C0403	9	VADEVCRIF		C0501	9	NADSSVQLL		C0602	9	KRVTWIVEF		C1502	9	GSISGITMV		C1701	9	SAIDRIFTL
C0202	9	SAKHIFKTY		C0401	9	IYDNAVQGL		C0403	9	VADFGLARL		C0501	9	NADSVQAKV		C0602	9	KTPDFILQV		C1502	9	GSIWKQLYV		C1701	9	SAIGLPVCL
C0202	9	SAKPEISAM		C0401	9	IYDNQGIEL		C0403	9	VADFGLITM		C0501	9	NADTPVSKF		C0602	9	KTYPLGRIL		C1502	9	GSLPTILHV		C1701	9	SAIGVLAFL
C0202	9	SAKPQTTVF		C0401	9	IYDPNLAFL		C0403	9	VADFGSATF		C0501	9	NADTVSSKL		C0602	9	KVPAFVRMI		C1502	9	GSLVHISYL		C1701	9	SAIGYIHSL
C0202	9	SAKSGAVTF		C0401	9	IYDSVKVYF		C0403	9	VADFSATYL		C0501	9	NADVALVNF		C0602	9	KVPELIRTI		C1502	9	GSNLFKLEV		C1701	9	SAIHTIAHL
C0202	9	SAKSPTATF		C0401	9	IYDVNKNEW		C0403	9	VADGLITTL		C0501	9	NADVQERLL		C0602	9	KVPTFVRML		C1502	9	GSNPLKREI		C1701	9	SAIIVASYL
C0202	9	SAKTPGFSV		C0401	9	IYDVQHANL		C0403	9	VADGLVTTL		C0501	9	NAEAKITKL		C0602	9	KVVDVVRNL		C1502	9	GSNVKIVKV		C1701	9	SAIQGVALL
C0202	9	SAKVKIAEF		C0401	9	IYEEFLAAF		C0403	9	VADGYPVRL		C0501	9	NAEQHVTQL		C0602	9	KYIDKTIRV		C1502	9	GSSDRILEL		C1701	9	SAIQLVSCL
C0202	9	SAMGSATRY		C0401	9	IYELAVASF		C0403	9	VADHPGIDF		C0501	9	NAIEGGTQL		C0602	9	KYPDIISRI		C1502	9	GSTDHIIRV		C1701	9	SAKERPIWL
C0202	9	SAMKEFAYM		C0401	9	IYELMQTEF		C0403	9	VADKDTVLL		C0501	9	NGDFLPTRL		C0602	9	KYPLLLREI		C1502	9	GSTEKVLRV		C1701	9	SAKSWPIFL
C0202	9	SAMMVESRY		C0401	9	IYEQKIAEL		C0403	9	VADLAESIM		C0501	9	NIDEGPLAF		C0602	9	LAAAMVRVL		C1502	9	GSTRIITRL		C1701	9	SALEFLTQL
C0202	9	SAMPTVRSF		C0401	9	IYEYVESRM		C0403	9	VADLLLVFI		C0501	9	NIDFMPTIL		C0602	9	LAATFIRSL		C1502	9	GSTTVFHSL		C1701	9	SALGHLSFL
C0202	9	SAMSNPRAM		C0401	9	IYSSLPVEV		C0403	9	VADLQLIDF		C0501	9	NIDVVGVSF		C0602	9	LASPVLRSV		C1502	9	GSVHIVHRL		C1701	9	SALGSQAHL
C0202	9	SAMYSRKAM		C0401	9	KADGVPVYL		C0403	9	VADLREAIL		C0501	9	NLDGTVTEM		C0602	9	LAVNLTRVL		C1502	9	GSVNRVTIL		C1701	9	SALPFITYL
C0202	9	SANADFANF		C0401	9	KADSVVVLL		C0403	9	VADPIIYVL		C0501	9	NLDQPPAFF		C0602	9	LFVDRIIYI		C1502	9	GSVSNPLFL		C1701	9	SALSAPTLL
C0202	9	SANHNILQI		C0401	9	KAPEPLSSL		C0403	9	VADPILYCF		C0501	9	NMDCPNHGF		C0602	9	LKPDLVNVI		C1502	9	GSVTVYYEV		C1701	9	SAMAVVSRL
C0202	9	SANVSKVSF		C0401	9	KFDADPVEL		C0403	9	VADPTPFHI		C0501	9	NMDSPGPML		C0602	9	LKPGMVVTF		C1502	9	GSWDGTLRL		C1701	9	SANDGFVRL
C0202	9	SAQGKPLAL		C0401	9	KFDAELLEI		C0403	9	VADPVEAVL		C0501	9	NSDEHAVVI		C0602	9	LKPNLVLDI		C1502	9	GSYAKVLLV		C1701	9	SAPTETHSL
C0202	9	SASDVHGNF		C0401	9	KFDALITTF		C0403	9	VADPVYRTF		C0501	9	NSDPYSVAL		C0602	9	LKPPHVILV		C1502	9	GSYDKSVAL		C1701	9	SAQGKPLAL
C0202	9	SASFLPKYF		C0401	9	KFDDGAVFL		C0403	9	VADPYVVIM		C0501	9	NSDSLPHRL		C0602	9	LKPSNILYV		C1502	9	GSYHRIRAL		C1701	9	SASAAEVLL
C0202	9	SASGIYGNF		C0401	9	KFDDIRIYF		C0403	9	VADQIVTKL		C0501	9	NSDTHSSTF		C0602	9	LLARSPFLV		C1502	9	GSYPQELIV		C1701	9	SASASSPKL
C0202	9	SASPHAAYY		C0401	9	KFDFPVSYL		C0403	9	VADQSVILL		C0501	9	NTDEPPMVF		C0602	9	LLFMLVLTV		C1502	9	GSYVFENTV		C1701	9	SASNSFSRL
C0202	9	SASPIFTHV		C0401	9	KFDIYTIAF		C0403	9	VADRLLVEL		C0501	9	NVDAGKSTL		C0602	9	LLLHLPRYL		C1502	9	GTFGKVILV		C1701	9	SASPSVAQL
C0202	9	SATSVHTSV		C0401	9	KFDLAARTL		C0403	9	VADTFQDYF		C0501	9	NVDAKIAKL		C0602	9	LLNPHLRQL		C1502	9	GTFLFLAEV		C1701	9	SATEALLWL
C0202	9	SATYIAEEY		C0401	9	KFDPMGKYF		C0403	9	VADVLCEFL		C0501	9	NVDDPTGNF		C0602	9	LLPDIISRL		C1502	9	GTIGLIHAV		C1701	9	SATGTVSDL
C0202	9	SAVGKIMKF		C0401	9	KFDPVGEIL		C0403	9	VADVVVSRW		C0501	9	NVDGHLYEL		C0602	9	LLPDIVTCV		C1502	9	GTIKKFLSL		C1701	9	SATICLAYL
C0202	9	SAVNIIRTF		C0401	9	KFDQVTVFL		C0403	9	VAEAVATFL		C0501	9	NVDPDNVVL		C0602	9	LLPDLIQKV		C1502	9	GTIMRVVEL		C1701	9	SATIVIAYL
C0202	9	SAVPKVMKV		C0401	9	KFDVQWIFV		C0403	9	VAETHIVLL		C0501	9	NVDPDSVVL		C0602	9	LLPDNVHYV		C1502	9	GTIPWFMEI		C1701	9	SATPRPLHL
C0202	9	SAVPSTSTM		C0401	9	KFDVSPVKI		C0403	9	VAEYEPVLI		C0501	9	NVDSGKSTL		C0602	9	LLPKHPHLV		C1502	9	GTLNVFQTV		C1701	9	SATQVFPRL
C0202	9	SAVTFVLTY		C0401	9	KFDVTQCMF		C0403	9	VFDCVVNSL		C0501	9	NVDSLITRL		C0602	9	LLPVITKEL		C1502	9	GTNFRVLLV		C1701	9	SATQVYTIL
C0202	9	SAYAKSEEF		C0401	9	KFDYVMQFL		C0403	9	VFDCVVTSL		C0501	9	NVDTPVSTL		C0602	9	LLRTASLHL		C1502	9	GTNFRVLWV		C1701	9	SATRVYIVL
C0202	9	SAYAQIVQF		C0401	9	KFEEWCIEM		C0403	9	VFDDMINLL		C0501	9	PIRLLAAAA		C0602	9	LPINGNGKQ		C1502	9	GTTDHVIVL		C1701	9	SAVAVCSFL
C0202	9	SAYARLIDY		C0401	9	KFPSPPAFI		C0403	9	VFDDTITEM		C0501	9	PSIVHRKCF		C0602	9	LQNAQVHQL		C1502	9	GTVPTPLVV		C1701	9	SAVENLLLL
C0202	9	SAYGSVKAY		C0401	9	KFPVKPADL		C0403	9	VFDDTLGSF		C0501	9	QADAPNPGL		C0602	9	LQPSILREV		C1502	9	GTYTGFIKV		C1701	9	SAVFMVTRL
C0202	9	SAYKRAAQF		C0401	9	KFWDYLHEI		C0403	9	VFDEAIRAV		C0501	9	QADAPNPSL		C0602	9	LRAALEVHV		C1502	9	GVNVTQVFV		C1701	9	SAVGKTSFL
C0202	9	SAYPHRLNL		C0401	9	KFWDYLQEF		C0403	9	VFDEVVQIF		C0501	9	QADARQVVL		C0602	9	LRAEMVAQL		C1502	9	HAAKVILQV		C1701	9	SAVPCALLL
C0202	9	SAYQHPASF		C0401	9	KFWQFLETV		C0403	9	VFDIVIHRF		C0501	9	QADCAVLIV		C0602	9	LRAGKPHLV		C1502	9	HAASVFLTL		C1701	9	SAVTPVTIL
C0202	9	SAYQHPTTF		C0401	9	KIEDYFPEF		C0403	9	VFDKTLAEL		C0501	9	QADEVIAIL		C0602	9	LRAVIVRVL		C1502	9	HAIHKVLQL		C1701	9	SAVTRLLIL
C0202	9	SAYQSITHY		C0401	9	KIVKWDRDM		C0403	9	VFDLIQELF		C0501	9	QADFEAHNI		C0602	9	LRFDGALNV		C1502	9	HAIQKYLEI		C1701	9	SAVTTTAHL
C0202	9	SAYSDIVKM		C0401	9	KLDVALKEM		C0403	9	VFDLTKEIF		C0501	9	QADFKPATL		C0602	9	LRFGNPLLV		C1502	9	HANAKKILL		C1701	9	SAYEFVTWL
C0202	9	SAYSGKVRY		C0401	9	KLPGNISSL		C0403	9	VFDNVKDFF		C0501	9	QADGRVVLV		C0602	9	LRFKKPQSL		C1502	9	HANPILLLV		C1701	9	SAYGAAAHL
C0202	9	SAYYALTKF		C0401	9	KMDFTAARL		C0403	9	VFDPALNLF		C0501	9	QADHFNTRL		C0602	9	LRFLFENKL		C1502	9	HAQPHHLLL		C1701	9	SAYKELTDL
C0202	9	SGGPGPRVY		C0401	9	KSDPSIVRL		C0403	9	VFDPIANCW		C0501	9	QADPSAPCL		C0602	9	LRFLHENQL		C1502	9	HAQTVVLCV		C1701	9	SGAPHAILL
C0202	9	SGMGKTAVF		C0401	9	KTDVTVVRF		C0403	9	VFDPVPVGV		C0501	9	QADQEAKEL		C0602	9	LRFNKTVRV		C1502	9	HASPGVLVV		C1701	9	SGFGGITML
C0202	9	SIESIHSEM		C0401	9	KWDALVIKL		C0403	9	VFDPVQKTL		C0501	9	QADSGRVLL		C0602	9	LRFPNGVQL		C1502	9	HATLVFHNL		C1701	9	SGFSGVIRL
C0202	9	SIIGRLLEV		C0401	9	KWDPTGNLL		C0403	9	VFDPVTKLW		C0501	9	QADSQSPKL		C0602	9	LRGDFVRRL		C1502	9	HAVHVALVL		C1701	9	SGISRLTWL
C0202	9	SIKDRMAKY		C0401	9	KWPDRITLL		C0403	9	VFDTAIAHL		C0501	9	QSDEDVIRL		C0602	9	LRGDIINEV		C1502	9	HAVQYFLHV		C1701	9	SGLTHVTSL
C0202	9	SINGAITQF		C0401	9	KWPETPLLL		C0403	9	VFDVIIRCF		C0501	9	QSDPSGAYF		C0602	9	LRHPAIRVL		C1502	9	HEGLPEPLT		C1701	9	SGVKKPIYL
C0202	9	SIRDGVRAY		C0401	9	KWSWYLDYL		C0403	9	VFDWIEANL		C0501	9	QTDQPETVI		C0602	9	LRHPGIVNL		C1502	9	HGLHRILVV		C1701	9	SIADRPLYL
C0202	9	SITRLIKKY		C0401	9	KYDATMIEI		C0403	9	VGDGYVVHL		C0501	9	QTDVGITHF		C0602	9	LRHPNILRL		C1502	9	HGNWIRLYL		C1701	9	SIIALCTHL
C0202	9	SPGAAVVML		C0401	9	KYDLAIKDL		C0403	9	VGDLPNGRV		C0501	9	RADAPVALV		C0602	9	LRHPNIVSL		C1502	9	HIIEDALVV		C1701	9	SIPDFPMHL
C0202	9	SQADIKKAY		C0401	9	KYDNMAELF		C0403	9	VGDPAVVFL		C0501	9	RADDARQLF		C0602	9	LRHVGLNEV		C1502	9	HIIFHITLV		C1701	9	SIYRVPLLL
C0202	9	SQCQKLWKL		C0401	9	KYDPNVYSI		C0403	9	VGDPHTVTV		C0501	9	RADDTFEAL		C0602	9	LRIEFEQNL		C1502	9	HILPHPVVV		C1701	9	SIYSRFVQL
C0202	9	SQFGGGSQY		C0401	9	KYDPSYIEF		C0403	9	VGDTQVVVF		C0501	9	RADEDARMI		C0602	9	LRIEFEQTL		C1502	9	HILTKILYL		C1701	9	SLAHRPVRL
C0202	9	SQHYHQGYY		C0401	9	KYDQLKVYL		C0403	9	VIDKLVVHL		C0501	9	RADEKITNI		C0602	9	LRIPAVRTV		C1502	9	HINIGALEL		C1701	9	SLYPHFTLL
C0202	9	SQYPFPVTL		C0401	9	KYDTALNLL		C0403	9	VIDPVPAAV		C0501	9	RADEVKSMF		C0602	9	LRIYHEQQV		C1502	9	HIPEVYLIV		C1701	9	SNYSHVIFL
C0202	9	SQYQGVVVY		C0401	9	KYDYVGRLL		C0403	9	VIDVVPPKF		C0501	9	RADGENTAF		C0602	9	LRMPGVQEY		C1502	9	HIVQKFLIL		C1701	9	SQVPFPSRL
C0202	9	SSADIRKAY		C0401	9	KYEDGIALL		C0403	9	VIEDKTIEL		C0501	9	RADGISSTF		C0602	9	LRNPFVQVF		C1502	9	HLTDITLKV		C1701	9	SQYPFPVTL
C0202	9	SSHVTNVSF		C0401	9	KYFLWEEKF		C0403	9	VIEINPYLL		C0501	9	RADIGAASL		C0602	9	LRNPVLQQV		C1502	9	HLTPVTLEL		C1701	9	SSHARPVSL
C0202	9	SSQGTVRFF		C0401	9	KYFLWVVKF		C0403	9	VIPESVILL		C0501	9	RADKIASKL		C0602	9	LRPEIAVYV		C1502	9	HMHIHISTV		C1701	9	SSHGGEIFL
C0202	9	SSSSLEKSY		C0401	9	LELFPAPIL		C0403	9	VIPGYEELL		C0501	9	RADKPWTRL		C0602	9	LRPESLHQV		C1502	9	HMSTVFLTL		C1701	9	SSHGNPILL
C0202	9	SSTPIAPVF		C0401	9	LFDAETVAL		C0403	9	VIPTNVPEL		C0501	9	RADLIEVVM		C0602	9	LRPFFLLSV		C1502	9	HNADQPLRV		C1701	9	SSIEHLTTL
C0202	9	STRDHLQTM		C0401	9	LFDAFHAGF		C0403	9	VLPNDPVFL		C0501	9	RADLTYAEF		C0602	9	LRPLLVKKI		C1502	9	HNAGISFSV		C1701	9	SSSPNIMLL
C0202	9	STYGRTPMY		C0401	9	LFDAFVSVL		C0403	9	VMDSKIVQV		C0501	9	RADPEPPGL		C0602	9	LRPNFTIAM		C1502	9	HNEGYILEL		C1701	9	SSVATITRL
C0202	9	SVASIKTGF		C0401	9	LFDAISIAV		C0403	9	VQDLIEGHL		C0501	9	RADQFEYVM		C0602	9	LRPPIMIMM		C1502	9	HNGIIFQFV		C1701	9	SSVATVVYL
C0202	9	SVIDYQTHF		C0401	9	LFDANKAEL		C0403	9	VQDPKVTYL		C0501	9	RADQQYECV		C0602	9	LRPPQPRFL		C1502	9	HNIAYQLQL		C1701	9	SSVGKVSVL
C0202	9	SVISHLLRV		C0401	9	LFDARTSLV		C0403	9	VRPNDEVTA		C0501	9	RADSVGKLV		C0602	9	LRPQMSQFL		C1502	9	HNIGQTCCL		C1701	9	SSVTKVLLL
C0202	9	SVKPASSSF		C0401	9	LFDASPTFF		C0403	9	VSDGLIVMI		C0501	9	RADTGHAFL		C0602	9	LRPVFQQRF		C1502	9	HNINRPLTM		C1701	9	SSYKEVTEL
C0202	9	SVRSNLTSF		C0401	9	LFDATLTQY		C0403	9	VSDHFPVEF		C0501	9	RAEEGFTQV		C0602	9	LRRPAVVYI		C1502	9	HNISLVAQL		C1701	9	SSYPGKTAL
C0202	9	TAAAVGAVF		C0401	9	LFDAVSSLI		C0403	9	VSDICTIYL		C0501	9	RAEELGQEL		C0602	9	LRSDIQKRL		C1502	9	HNIWVILVV		C1701	9	SSYYGVVRL
C0202	9	TAADIFKQY		C0401	9	LFDCYVVVM		C0403	9	VSDLGPVVL		C0501	9	RAEEREIKF		C0602	9	LRSDLVLLY		C1502	9	HNLGRFITV		C1701	9	STIRLLTSL
C0202	9	TAFPGTGGF		C0401	9	LFDDCTQQF		C0403	9	VSDPVTVHF		C0501	9	RAELHPVEL		C0602	9	LRSEILHRV		C1502	9	HNLISLLEV		C1701	9	STPQHPLLL
C0202	9	TAHQINIGY		C0401	9	LFDDIDHNM		C0403	9	VSTSHTTIS		C0501	9	RGDDGGASF		C0602	9	LRSGKFNVL		C1502	9	HNLSKIMKL		C1701	9	SVISVVSYL
C0202	9	TAIGHINRY		C0401	9	LFDDKAVEI		C0403	9	VTDDLVCLV		C0501	9	RGDDTPLHL		C0602	9	LRSGVIVRL		C1502	9	HNLVHLLLL		C1701	9	SVYSGCLHL
C0202	9	TAKSVTCTY		C0401	9	LFDDSEVKV		C0403	9	VTDEVFNFL		C0501	9	RGDGKVIKL		C0602	9	LRSGVLQRL		C1502	9	HNNIIVLIV		C1701	9	TAAGGTVHL
[truncated: 2,187 more rows]

## Sheet: p9freqallC1C2
p9	C0102	C0302	C0303	C0304	C0701	C0702	C0704	C0801	C0802	C1202	C1203	C1402	C1403	C1601	Average	p9	C0202	C0401	C0403	C0501	C0602	C1502	C1701	Average	Fold	Pvalue	LogP	-LogP
[truncated: 20 more rows]

[truncated: 1 more sheets: p8freqallC1C2]
