# Supplementary material for: T cells discriminate between groups C1 and C2 HLA-C
Source: eLife. 2022 May 19;11:e75670. doi: 10.7554/eLife.75670 (PMC9177145; doi:10.7554/eLife.75670)
Supplement: Figure 3—source data 1. — MdFI of tetramer binding experiments in 3C. Responses of all TCR10 binding assays in 3F. [file elife-75670-fig3-data1.xlsx]

## Sheet: 3A
	Response units
Time (s)	37.5	75	150	300	600	1200	[TCR9a] nM
2.5	0.374878	0.361328	0.572205	0.206055	0.158203	0.247314
3.5	0.55481	-0.00665	0.513306	-0.16577	0.292725	0.287292
4.5	0.392517	-0.0388794	0.760864	0.206665	0.471313	0.507996
5.5	0.52832	0.195251	0.432739	0.133423	-0.0174	0.205322
6.5	0.32843	-0.0820923	0.436218	0.059021	0.305542	0.361328
7.5	0.28	0.168091	0.606	0.412659	0.405579	0.587891
8.5	1.00043	0.339172	0.842834	0.578491	0.627686	0.74939
9.5	0.887512	0.471008	0.798035	0.322998	0.528381	0.769836
10.5	0.47644	-0.0229492	0.499939	0.118408	0.075623	0.531494
11.5	0.535889	0.130127	0.27478	0.035156	0.26178	0.18396
12.5	0.533997	0.387695	0.620117	0.092896	0.481567	0.401001
13.5	0.382202	0.387146	0.546814	0.057922	0.297607	0.483643
14.5	0.467957	0.199158	0.431274	0.12323	0.256653	0.222595
15.5	-0.0142	0.0493774	0.371277	0.07666	0.087219	0.033875
16.5	0.353699	0.367	0.172	0.26593	0.247681	0.411377
17.5	-0.000183	0.0877075	-0.0161743	0.125732	0.059692	0.113403
18.5	0.102722	0.0453491	-0.145691	0.033997	-0.02728	-0.05438
19.5	0.140015	0.0460205	0.161743	-0.15906	0.096314	0.07666
20.5	0.303955	0.210815	0.314514	0.337524	0.315979	0.303162
21.5	-0.00964	-0.0524902	0.0780029	-0.19995	0.0097	-0.2627
22.5	0.345	-0.0167236	0.14209	0.122925	-0.00336	-0.15167
23.5	0.0438232	0.0510254	0.31781	0.050171	0.226929	0.208923
24.5	-0.186	-0.112732	0.123535	-0.11707	-0.03601	0.260193
25.5	-0.163269	0.12323	0.0930176	-0.19293	0.186523	0.479858
26.5	-0.0288696	0.0194702	0.229126	-0.25214	0.062988	0.208984
27.5	0.0283203	-0.371	0.0852051	-0.24298	0.01709	-0.11871
28.5	-0.0415649	-0.18573	0.24231	-0.20563	0.041809	0.126404
29.5	0.0888672	0.186584	0.226196	-0.10413	0.079102	0.085632
30.5	0.217224	-0.184387	0.336487	0.2052	0.123291	0.220947
31.5	0.128601	0.0487671	0.476013	0.233154	0.094177	0.399231
32.5	0.340271	-0.00696	-0.0271606	-0.29565	0.04657	0.18988
33.5	0.215271	0.0594482	-0.0919	-0.10541	0.042908	0.23584
34.5	0.0177612	-0.0770264	-0.230408	-0.33441	0.166748	-0.04822
35.5	-0.292847	-0.106079	-0.247925	-0.4118	-0.008	-0.21448
36.5	-0.0417	-0.170105	-0.438416	-0.11047	-0.10761	-0.05188
37.5	0.189575	0.18927	-0.0545044	0.123413	0.174194	0.283936
38.5	0.0249023	0.145264	-0.0560303	0.111023	0.175476	0.346863
39.5	0.0352783	0.259	0.250427	-0.01416	-0.02771	-0.01202
40.5	0.103	0.192505	0.0597534	0.08606	0.065552	-0.3125
41.5	-0.267212	-0.145691	-0.400635	-0.13477	-0.53162	-0.33093
42.5	0.543213	0.312805	0.222595	0.585327	0.315918	0.203247
43.5	0.462097	0.529114	0.259216	0.553284	0.219055	0.257629
44.5	-0.302734	-0.0755005	-0.152161	-0.09991	0.466064	-0.16547
45.5	-0.17688	-0.281555	-0.192566	-0.03558	-0.62817	-0.21265
46.5	-0.548157	-0.204468	-0.135193	-0.01233	-0.43359	-0.32611
47.5	-0.219299	0.0798	-0.0913086	-0.01758	-0.06683	-0.2038
48.5	-0.504028	-0.194397	-0.039856	0.227539	-0.22479	-0.35297
49.5	-0.198	-0.205505	0.0964966	0.366272	0.079651	-0.19794
50.5	-0.172424	-0.116699	-0.0876465	0.309082	0.181458	-0.37024
51.5	-0.200623	0.0674438	-0.193726	0.479553	-0.0509	-0.41364
52.5	-0.242126	0.346741	-0.358093	0.123657	-0.39984	-0.44409
53.5	-0.210449	0.406311	-0.303894	0.044006	-0.49915	-0.53882
54.5	-0.0458	0.797852	0.623657	0.61853	0.184509	-0.01337
55.5	-0.208191	0.707092	0.580566	0.539307	0.260437	0.040039
56.5	-0.454224	0.136963	0.0463	0.320923	0.468201	-0.03632
57.5	-0.361694	-0.0998535	0.18335	0.174866	0.287292	-0.01819
58.5	-0.518	-0.182495	-0.00958	-0.06842	0.102539	0.166016
59.5	-0.376099	-0.28009	0.0724487	0.035339	0.059448	-0.08594
60.5	-0.334412	-0.109741	-0.237183	-0.0285	-0.06403	-0.28693
61.5	-0.02771	0.00818	0.0888062	0.05304	0.121277	-0.30011
62.5	-0.0786743	0.188	0.117	0.251038	0.410339	0.00549
63.5	-0.39	-0.256226	-0.0419312	-0.09595	0.117554	-0.19849
64.5	-0.350647	-0.169983	-0.352356	-0.27667	0.265503	-0.56934
65.5	-0.409973	-0.625549	-0.625916	-0.36707	-0.75037	-0.65344
66.5	-3.742	-7.00348	-11.7532	-14.3558	-4.4325	-9.90204
67.5	-0.985107	-10.0367	-8.52521	-8.15979	-16.4962	-5.26971
68.5	-0.330261	-3.89807	-3.66577	-2.90253	-3.77734	0.452026
69.5	-0.134583	-2.29181	-2.08203	-0.92169	0.424133	3.77606
70.5	-0.0463	-1.6228	-1.53748	-0.0517	2.13092	6.30731
71.5	-0.396484	-1.6557	-1.29102	0.520569	3.19147	8.18964
72.5	0.0839844	-1.30963	-0.722839	1.15271	4.32367	10.041
73.5	0.00739	-1.58813	-0.419373	1.48224	5.43945	11.4942
74.5	-0.228333	-1.53992	-0.363281	2.07428	6.12592	12.7509
75.5	-0.233032	-1.46301	-0.148865	2.45331	6.88666	13.9051
76.5	0.166382	-0.953003	0.611145	3.41394	8.17517	15.5464
77.5	0.196594	-0.906982	0.973755	4.02264	8.9552	16.7828
78.5	0.174866	-0.722961	0.881836	4.27496	9.52881	17.6423
79.5	-0.0263062	-0.308899	0.994507	5.00311	10.4351	18.8803
80.5	0.252686	-0.019043	1.44873	5.50146	11.3129	19.8002
81.5	0.541199	0.220947	1.69055	5.98572	11.8945	20.8347
82.5	0.455139	0.193298	1.89349	6.0918	12.2355	21.454
83.5	0.249634	0.000732	2.11047	6.31403	12.9714	22.1412
84.5	0.774658	0.447144	2.52026	7.04572	13.9579	23.0008
85.5	0.243469	0.398315	2.52332	7.21918	14.4598	23.8371
86.5	0.75824	0.502014	2.76721	7.61554	15.1279	24.6675
87.5	0.552429	0.691589	2.93695	8.03265	15.7925	25.4532
88.5	0.610779	0.69989	3.04901	8.21484	16.1743	26.0103
89.5	0.659729	0.786255	3.06915	8.70386	16.4608	26.5353
90.5	0.955017	1.04541	3.54547	9.0462	17.0098	27.1636
91.5	0.816772	1.09595	3.73657	9.23694	17.5861	27.6096
92.5	0.925476	1.34357	3.62891	9.44287	17.7857	28.0123
93.5	0.817078	1.03076	4.04736	9.95453	18.0989	28.3713
94.5	0.599548	1.07544	4.20239	10.2399	18.7204	29.0628
95.5	0.751343	1.17462	4.57806	10.4746	18.9035	29.3231
96.5	1.06238	1.25562	4.62665	10.5776	19.3467	29.8615
97.5	1.21625	1.52441	4.69226	10.8906	19.7629	30.2039
98.5	1.16559	1.53735	4.79407	11.1073	20.2302	30.4697
99.5	1.45758	1.68353	5.21814	11.438	20.7249	30.8985
100.5	1.47119	1.71893	5.27057	11.7982	20.9795	31.2733
101.5	1.72711	1.8493	5.76306	12.0698	21.3806	31.8846
102.5	2.0426	2.22528	6.21405	12.6687	21.8165	32.2674
103.5	2.08191	2.43842	6.13348	12.5878	22.3668	32.6225
104.5	2.34399	2.67267	6.74188	13.6172	23.004	33.3071
105.5	1.94543	2.53027	6.61932	13.5807	23.0502	33.3905
106.5	1.76184	2.75055	6.81763	13.5214	23.3001	33.8295
107.5	2.0033	2.90979	7.19141	13.9946	23.7897	34.3231
108.5	1.76324	2.64935	6.82117	13.8004	23.6169	34.0353
109.5	1.8269	2.82782	7	14.281	23.8127	34.3426
110.5	1.91699	3.1709	7.20642	14.2276	23.9701	34.3293
111.5	2.02954	3.15552	7.62048	14.6243	24.3954	34.8489
112.5	2.05994	3.34375	7.83826	14.6819	24.6709	35.1077
113.5	2.34961	3.46069	7.84241	15.0364	24.8842	35.2026
114.5	2.58698	3.29138	8.0918	15.2861	25.2343	35.5519
115.5	2.35425	3.03802	7.93549	15.1331	25.2131	35.6508
116.5	2.37738	3.38177	7.94458	15.496	25.572	35.9096
117.5	2.29962	3.14624	7.89319	15.3917	25.606	35.9395
118.5	2.09357	2.90601	7.85083	15.1769	25.787	35.6599
119.5	2.40558	3.59229	8.31793	15.7996	26.2609	36.5716
120.5	2.52228	3.80652	8.45093	15.815	26.3857	36.4095
121.5	2.50494	3.8277	8.7326	16.1609	26.6489	36.8415
122.5	2.49243	3.73804	8.73273	16.3284	26.7983	36.9084
123.5	2.33881	3.6759	8.60913	16.1927	26.7634	36.8381
124.5	2.31677	3.60272	8.76135	16.4971	26.8033	37.2161
125.5	2.58026	3.651	9.03925	16.9114	27.1331	37.3376
126.5	2.40771	3.73669	8.92023	16.879	27.1184	37.3096
127.5	2.79016	4.3009	9.58722	17.5508	27.6552	37.9229
128.5	2.49268	4.05438	9.29639	17.4093	27.5779	37.8858
129.5	2.83917	4.20056	9.60254	17.5964	27.9449	38.2679
130.5	2.75769	4.45044	9.60645	17.7756	27.8705	38.2955
131.5	2.87354	4.32556	9.60883	17.8738	28.1615	38.29
132.5	2.61176	4.29169	9.36206	17.7985	28.0976	38.2104
133.5	2.66943	4.4549	9.60437	18.0403	28.3876	38.6324
134.5	2.88489	4.5719	9.67712	18.3152	28.2636	38.744
135.5	2.83331	4.83356	10.0665	18.3849	28.6652	38.9841
136.5	2.54657	4.3927	10.0596	18.4163	28.5048	39.0665
137.5	3.13055	4.73749	10.5546	18.5497	29.0243	39.269
138.5	2.75061	4.80536	10.4809	18.5164	29.0004	39.4156
139.5	2.81036	4.42645	10.502	18.6066	29.0563	39.6848
140.5	3.14935	4.88531	10.8154	19.0653	29.3119	39.8729
141.5	2.93848	4.7865	10.6746	19.1188	29.4476	40.2466
142.5	2.97296	4.70447	10.6542	19.3475	29.2211	40.025
143.5	2.93512	4.73053	10.9797	19.2338	29.4798	39.8715
144.5	3.08032	4.98218	10.823	19.4865	29.6847	40.124
145.5	3.11554	5.01282	11.0316	19.6587	30.0007	40.5599
146.5	2.81696	5.10474	10.8755	19.8625	29.7163	40.3926
147.5	2.69751	4.78705	11.145	19.7371	29.6075	40.1785
148.5	2.87811	4.95209	11.4164	20.0894	29.8652	40.3408
149.5	3.09882	5.40417	11.6736	20.2269	30.3648	40.6256
150.5	3.0929	5.479	11.4139	20.2154	30.4053	40.6215
151.5	3.05768	5.26373	11.4348	20.1997	30.2981	40.6859
152.5	2.99664	5.47974	11.2359	20.2675	30.2992	40.9324
153.5	3.19409	5.54834	11.4614	20.3154	30.5693	41.0537
154.5	3.06213	5.31726	11.0812	20.2159	30.2302	40.8969
155.5	3.38879	5.2326	11.6725	20.6016	30.4139	41.3849
156.5	3.27649	5.24945	11.4454	20.6698	30.6318	41.402
157.5	3.5343	5.70508	11.9471	20.7289	30.7523	41.7175
158.5	3.30109	5.36353	11.7953	20.7148	30.7532	41.6505
159.5	3.24841	5.46204	12.0189	20.4944	30.9598	41.5882
160.5	3.48462	5.52509	12.1096	20.7047	30.9418	41.6774
161.5	3.3515	5.22882	11.9451	20.681	30.7846	42.02
162.5	3.29205	5.28461	12.0969	20.9608	30.8103	41.9204
163.5	3.4234	5.57501	12.2428	21.0614	30.8629	41.9667
164.5	3.61957	5.61621	12.1653	21.1818	31.1067	42.1572
165.5	3.26849	5.70215	11.8932	21.1007	31.1116	42.1502
166.5	3.13245	5.76489	12.2367	21.1179	31.3544	42.3425
167.5	3.64227	6.02704	12.6554	21.2916	31.3187	42.515
168.5	3.60181	5.78168	12.3907	20.942	31.2468	42.4296
169.5	3.39246	5.85968	12.4676	21.3099	31.0701	42.4343
170.5	3.46484	5.78168	12.8108	21.6265	31.264	42.512
171.5	3.8465	6.27948	13.3224	21.9485	31.6968	42.9594
172.5	3.96759	6.12457	13.0369	21.9349	31.7022	42.7583
173.5	3.64862	6.07373	12.9401	21.9337	31.8656	42.6559
174.5	3.68994	6.47791	13.0822	21.7797	32.0976	43.1138
175.5	4.03589	6.40613	13.4066	22.2851	32.3635	43.1413
176.5	3.89948	6.47705	13.2446	22.1558	32.098	43.1486
177.5	4.09802	6.85272	13.4747	22.2305	32.2025	43.4156
178.5	3.89362	6.48114	13.2131	21.9875	32.127	43.3447
179.5	4.37488	6.84723	13.5107	22.5533	32.4203	43.5311
180.5	4.3559	6.74341	13.4988	22.4879	32.2913	43.631
181.5	4.49762	6.7981	13.4125	22.0409	32.084	43.5377
182.5	4.15991	6.53552	13.3214	22.1316	32.0605	43.4977
183.5	4.06262	6.7395	13.5916	22.4188	32.6283	43.5284
184.5	4.54962	6.77014	13.5376	23.0757	33.5497	43.5322
185.5	5.34467	-0.200012	20.04	18.0461	23.6469	53.3907
186.5	6.45703	30.8666	26.2208	39.8997	51.9476	58.2625
187.5	4.80847	12.8024	17.8989	27.4996	40.6054	48.394
188.5	4.43164	9.42993	15.9404	24.6552	36.0566	45.8403
189.5	4.16632	8.48877	15.5187	24.1497	34.4067	45.0305
190.5	4.04907	8.01385	15.2108	23.7986	33.7546	44.785
191.5	3.85895	7.86224	14.5402	23.4147	32.3525	43.9421
192.5	3.57465	7.82477	14.5959	23.0258	33.084	43.4672
193.5	3.92133	7.68091	14.5473	23.0419	32.7036	42.9677
194.5	4.01526	7.76288	14.6974	23.199	32.5314	43.2308
195.5	3.93164	7.65405	14.3095	22.9769	32.2312	42.7512
196.5	3.87543	7.70178	14.4295	22.7244	32.1738	42.4744
197.5	3.8587	7.51678	14.1993	22.7334	32.0636	42.235
198.5	3.69312	7.28076	14.2814	22.4286	31.7219	41.6886
199.5	3.9762	7.56763	14.1011	22.4155	31.8742	41.3806
200.5	3.67902	7.26312	13.7691	22.0392	31.4913	41.006
201.5	3.77289	7.26837	13.952	21.6671	30.9437	41.0603
202.5	3.85559	7.07831	13.8312	21.6973	30.8885	40.7638
203.5	3.65826	6.79138	13.4153	21.2263	30.4568	40.3428
204.5	3.53125	7.04535	13.4498	21.1895	30.2598	40.1724
205.5	3.81116	7.06958	13.4258	21.6382	30.0227	39.7843
206.5	3.35596	7.0379	13.262	20.6843	30.2878	39.0952
207.5	3.62555	6.62158	12.8649	21.1569	28.9771	39.4427
208.5	3.80243	7.10443	13.3041	20.9631	29.989	38.7562
209.5	3.21722	6.42657	12.8429	20.5162	28.696	38.4436
210.5	3.54529	6.57434	13.073	20.236	29.6871	37.92
211.5	3.82776	6.74976	12.3176	24.3893	24.9201	42.1764
212.5	3.4386	6.21619	12.4107	19.0504	29.2607	36.6899
213.5	3.24591	6.47479	12.2885	19.4151	29.5129	36.8199
214.5	3.39148	6.47449	12.3254	19.7646	28.6152	37.0294
215.5	3.39484	6.54779	12.1705	19.7064	28.1155	36.8998
216.5	2.99249	6.41711	12.1952	19.5607	27.3618	36.6239
217.5	3.05328	6.24286	12.1431	19.4901	27.4138	36.3521
218.5	3.40314	6.51184	12.4384	19.6413	27.3646	36.2971
219.5	3.40607	6.67133	12.6396	19.718	27.3669	36.5627
220.5	3.30084	6.45337	12.2207	19.6722	26.6536	36.4625
221.5	2.85156	6.21838	11.597	18.5829	27.728	34.6138
222.5	2.88226	6.25763	11.659	18.8242	26.9507	35.4704
223.5	3.20758	6.10297	11.6392	18.8708	26.6545	35.4243
224.5	3.27515	6.22455	11.9068	18.9855	26.8073	35.1712
225.5	3.27972	5.93536	11.532	18.2769	26.2038	34.6277
226.5	3.21198	5.85724	11.563	18.0693	25.6687	34.4658
227.5	2.95496	5.5188	11.38	17.9855	25.4728	34.1309
228.5	3.07574	5.67395	11.408	17.9192	25.2784	34.0531
229.5	3.00861	5.75952	11.2888	18.2911	25.3432	34.2628
230.5	3.0528	5.6358	10.8819	18.0218	24.9421	33.7365
231.5	2.82428	5.55829	10.8751	17.8837	24.7105	33.2548
232.5	2.9093	5.50269	10.8461	17.7335	24.6005	33.2757
233.5	3.2215	5.45819	10.8524	17.624	24.2793	33.0036
234.5	3.25031	5.42065	10.8235	17.4564	24.4316	32.9368
235.5	2.96271	5.51758	10.7094	17.1831	24.1741	32.5215
236.5	2.90039	5.88568	10.8231	17.4814	24.2307	32.365
237.5	3.19543	5.74304	10.5176	17.2079	24.0724	32.2233
238.5	3.24237	5.54565	10.5572	17.1346	23.9244	31.8081
239.5	2.92847	5.52673	10.3148	17.0399	23.4494	31.8113
240.5	2.72534	5.29657	10.2094	16.7144	23.2379	31.4732
241.5	3.11584	5.59937	10.44	16.8502	23.2519	31.2263
242.5	2.82996	5.55994	10.0823	16.4982	23.394	31.0966
243.5	3.13745	5.4892	10.2639	16.7202	23.1479	31.0958
244.5	2.89069	5.3963	10.404	16.7251	22.6987	31.0331
245.5	2.74609	5.1535	10.2959	16.533	22.6881	30.6182
246.5	2.48981	4.82123	10.0049	16.1863	22.3444	30.3293
247.5	2.76019	4.86194	9.8299	16.2026	22.2388	30.4746
248.5	3.08527	5.07831	10.0389	16.2897	22.5222	30.2211
249.5	2.60138	4.71375	9.5813	15.8344	22.0024	29.6901
250.5	2.73206	4.83759	9.65771	15.8885	22.1799	29.6248
251.5	2.85034	5.4469	9.87494	15.8651	21.9711	29.327
252.5	2.76489	4.9245	9.46637	15.6927	21.6244	29.2779
253.5	2.89154	5.11633	9.50952	15.482	21.5669	29.019
254.5	2.72882	4.97711	9.30536	15.3419	21.3588	28.8796
255.5	2.39355	4.99786	9.32166	15.1967	21.5165	28.5217
256.5	2.63019	4.99573	9.41595	15.1467	21.3187	28.5031
257.5	2.5033	4.74658	9.20544	15.05	21.0181	28.2742
258.5	2.48096	5.09137	8.97601	15.0016	21.0197	28.0191
259.5	2.47723	4.69806	9.19464	14.9477	20.8135	28.3477
260.5	2.41846	4.66833	9.32794	14.9913	20.6434	28.0353
261.5	2.32806	4.64044	9.01483	14.6968	20.4172	28.2066
262.5	2.63892	4.73401	9.28168	14.5639	20.4213	27.9493
263.5	2.72931	4.77344	9.22198	14.5049	20.5736	27.7183
264.5	2.32678	4.51068	9.05371	14.2314	20.2668	27.4127
265.5	2.3349	4.41193	9.16101	14.4009	19.984	27.0099
266.5	2.54468	4.40326	8.93567	14.1075	19.656	26.9434
267.5	2.43109	4.81586	9.03522	14.2436	19.6064	27.1476
268.5	2.42578	4.24866	8.71344	13.7195	19.2092	26.54
269.5	2.39557	4.07922	8.69769	13.4521	18.9947	26.3155
270.5	2.01703	4.10913	8.37537	13.3043	18.6681	25.6569
271.5	1.9469	3.9953	8.45422	13.6965	18.8124	25.8078
272.5	2.02234	4.20728	8.57324	13.5853	18.7794	26.1448
273.5	2.42493	4.21118	8.48975	13.634	18.6299	25.8087
274.5	2.43787	4.07709	8.31677	13.1542	18.6611	25.5997
275.5	2.19501	3.89465	8.22388	12.7955	18.2091	25.1246
276.5	2.09271	4.04108	8.35193	13.0872	18.1581	25.241
277.5	1.92908	3.9306	8.12366	12.7892	17.885	24.773
278.5	1.91602	4.11682	8.203	12.8372	17.8453	24.8915
279.5	1.7312	4.20508	8.27563	12.8289	17.8115	24.3748
280.5	1.9231	4.01581	8.08142	12.5543	17.8329	24.4005
281.5	1.92694	3.94397	7.83801	12.558	17.6318	24.0183
282.5	1.83929	3.79297	7.82867	12.5248	17.4573	23.8842
283.5	1.89063	3.49634	7.87476	12.2648	17.5206	23.9672
284.5	1.77222	3.6189	7.77026	12.4586	17.2626	23.6915
285.5	1.90082	3.58716	7.65619	12.3131	17.3273	23.7149
286.5	1.96814	3.57269	7.45245	12.1179	16.9872	23.3489
287.5	2.05096	3.49603	7.54968	11.9497	17.1769	23.3436
288.5	1.93353	3.4212	7.54376	11.5211	16.8208	23.3074
289.5	1.85986	3.38159	7.46039	11.8	16.53	22.8223
290.5	1.82867	3.23322	7.44537	11.5085	16.4988	22.8457
291.5	1.94409	3.4035	7.67566	11.7211	16.6926	22.8491
292.5	1.99493	3.56403	7.22137	11.4641	16.7649	22.6149
293.5	1.83215	3.21545	6.87134	11.4096	16.3559	22.402
294.5	1.89093	3.38654	7.53992	11.3528	16.3693	22.3469
295.5	2.16089	3.63263	7.56244	11.6243	16.2115	22.197
296.5	2.0816	3.38892	7.25739	11.5544	15.8221	22.1394
297.5	2.0993	2.91437	7.02417	11.2832	15.6323	22.0702
298.5	2.09009	3.21033	6.96729	11.2854	15.8911	22.0773
299.5	2.08221	3.31659	7.32001	11.4164	15.7155	21.7189
300.5	2.23743	3.34778	7.40979	11.2243	15.8004	21.6442
301.5	2.42902	3.40027	7.45636	11.3696	16.2805	21.796
302.5	2.41321	3.52167	7.3877	11.1981	16.102	21.8442
303.5	2.02264	3.33057	7.12946	10.9194	15.6143	21.632
304.5	2.2301	3.17297	7.31396	10.9672	15.6794	21.6823
305.5	2.00372	2.76959	7.18085	10.6678	15.5114	21.1708
306.5	1.91156	2.76178	6.8595	10.5225	15.3421	20.8087
307.5	2.17053	2.89105	6.8692	10.4835	14.9625	20.8857
308.5	1.86578	2.86768	6.81354	10.5814	14.8873	20.5074
309.5	1.89105	3.00452	6.80017	10.8989	14.9895	20.4882
310.5	1.7149	2.89886	6.84698	10.4219	14.8843	20.2183
311.5	1.4787	2.74963	6.32269	9.93896	14.3764	20.1155
312.5	1.7533	2.86932	6.4184	10.3754	14.5297	20.1506
313.5	2.28259	3.42645	7.06445	10.7232	14.9046	20.3322
314.5	2.50818	3.46838	6.98712	10.507	14.8591	20.2322
315.5	2.20215	2.98553	6.72125	10.2274	14.7289	20.0404
316.5	2.00702	3.16321	6.81061	10.2892	14.3238	19.8379
317.5	2.02728	2.76105	6.53339	9.92377	14.0032	19.426
318.5	2.01721	3.12421	6.34863	10.0491	14.2016	19.44
319.5	1.97339	2.86865	6.4137	9.9444	13.9629	18.9643
320.5	1.81348	2.92926	6.27557	9.81567	13.8055	18.9783
321.5	2.04236	3.0426	6.48627	9.96954	13.7775	19.0674
322.5	1.96735	3.02954	6.58441	9.83124	13.6372	18.8893
323.5	1.54871	2.74072	6.40039	9.56305	13.3044	18.5235
324.5	2.10242	2.97388	6.49469	9.77808	13.8859	18.6243
325.5	2.17462	3.09393	6.61554	9.99469	13.6899	18.6749
326.5	2.38519	3.50934	6.93011	10.1973	13.6503	18.8129
327.5	2.13483	3.46979	6.61743	9.88873	13.3657	18.3655
328.5	2.1543	3.06738	6.59082	9.77362	13.4512	18.2734
329.5	1.5769	2.59143	6.05499	9.66406	13.2902	18.152
330.5	1.3454	2.61371	5.91022	9.39844	13.1046	17.9422
331.5	1.49078	2.59674	6.03729	9.27954	12.9455	17.905
332.5	1.75946	2.65948	6.22815	9.39752	13.1365	17.8594
333.5	1.71851	2.51025	5.98389	9.24109	13.0286	17.6342
334.5	1.90009	2.67102	6.18195	9.44525	13.0829	17.7874
335.5	1.94757	2.57843	5.98169	9.47876	13.2195	17.6072
336.5	2.02753	2.7196	5.7688	9.25787	13.0495	17.5399
337.5	1.81458	2.70947	5.94208	9.29346	12.9576	17.4702
338.5	1.69092	2.96136	5.7533	9.0733	12.8093	17.2971
339.5	2.13281	2.98151	6.25867	9.50281	12.9434	17.1945
340.5	1.92346	2.63129	5.7132	9.21027	12.5722	17.0824
341.5	1.7821	2.84088	5.71381	9.00867	12.6786	17.5204
342.5	1.60858	2.58911	5.46429	8.89331	12.4307	17.3343
343.5	1.71887	2.71649	5.9184	9.13684	12.3727	17.1296
344.5	1.86438	2.6684	5.73602	9.09344	12.261	16.8411
345.5	1.82526	2.62848	5.80768	8.98151	11.8753	16.7485
346.5	1.28125	2.5379	5.39795	8.40955	11.406	16.3742
347.5	1.36066	2.27454	5.40997	8.30829	11.2784	16.3286
348.5	1.16754	2.44098	5.37799	8.59869	11.2827	16.2247
349.5	1.25195	2.32153	5.08704	8.216	11.1309	16.1031
350.5	1.67151	2.69171	5.31238	8.6969	11.6063	16.569
351.5	1.38916	2.58704	5.09631	8.07849	11.1967	16.2386
352.5	1.45612	2.63232	5.31708	8.02399	11.4456	15.9781
353.5	1.633	2.79102	5.32153	8.40344	11.5328	16.217
354.5	1.32727	2.37115	4.96246	8.02332	11.0468	15.691
355.5	1.11163	2.20685	4.94165	7.79871	11.1332	15.322
356.5	1.24597	2.36475	5.073	8.05157	11.2381	15.1369
357.5	1.27856	2.13037	5.23462	7.80743	10.887	15.1751
358.5	1.26465	2.22137	5.36517	7.92065	10.8439	15.324
359.5	1.10284	2.1532	5.14063	7.99176	10.8018	15.3907
360.5	1.06024	2.32196	4.9917	7.92566	10.6427	15.451
361.5	0.99939	2.1366	4.81494	7.49713	10.6441	15.1251
362.5	0.995239	2.21002	4.53375	7.12476	10.4162	15.0999
363.5	1.47278	2.36279	4.89441	7.49524	10.6108	14.9829
364.5	1.23969	2.58075	4.91809	7.50415	10.4894	14.9733
365.5	1.28217	2.30646	4.69495	7.56787	10.5069	14.838
366.5	1.60754	2.36755	5.00208	8.00458	10.7804	14.8997
367.5	1.13757	2.20905	4.70776	7.43469	10.3766	14.7999
368.5	1.16779	1.93622	4.73901	7.20624	10.2115	14.3615
369.5	1.21411	2.00482	4.63696	7.28387	10.3931	14.2135
370.5	1.1333	1.97235	4.81519	7.30688	9.98865	14.1075
371.5	1.39355	2.13538	5.08044	7.21539	10.1265	14.2554
372.5	1.32269	2.36707	4.68219	7.23724	10.0554	14.1281
373.5	1.25232	2.22498	4.81549	7.35834	9.9588	13.9086
374.5	1.00415	2.12585	4.74188	7.29395	9.97699	13.5722
375.5	1.01501	2.20709	4.50311	7.19971	9.66315	13.7868
376.5	1.17316	2.00983	4.48334	7.2019	9.63965	13.7467
377.5	1.43915	2.33972	4.70135	7.34448	9.98254	13.8251
378.5	1.08728	1.90607	4.46832	7.1947	9.43176	13.3187
379.5	0.874878	1.66412	4.15021	6.88794	9.28357	13.3583
380.5	1.25775	1.68671	4.10614	6.89777	9.18524	13.5898
381.5	0.926147	1.62195	3.95154	6.76294	9.43793	13.4216
382.5	0.873474	1.82385	4.11578	6.88	9.32013	13.6227
383.5	1.24176	2.20935	4.31079	6.97656	9.48724	13.9624
384.5	1.10803	1.9328	4.32654	6.7196	9.32727	13.6231
385.5	0.982239	1.53741	4.2829	6.58118	9.18719	13.2233
386.5	1.06757	1.65186	4.0791	6.70612	9.22412	13.3319
387.5	1.23901	1.86993	4.06848	6.84393	9.25983	13.5726
388.5	1.09998	1.64325	4.23572	6.66846	8.87201	13.3667
389.5	1.43127	2.07813	4.23767	6.63745	9.21704	13.3683
390.5	1.37079	1.9682	4.26245	6.38782	9.08008	13.251
391.5	1.25977	2.04993	3.93829	6.30469	8.83759	13.0886
392.5	1.38098	2.26111	4.41156	6.93903	9.26276	13.4315
393.5	1.09326	1.90979	4.28625	6.47906	8.97308	13.0762
394.5	1.00006	1.92694	4.17511	6.69348	9.01569	13.0468
395.5	1.31244	2.19489	4.32001	6.58374	9.01147	13.1254
396.5	1.00012	1.91412	4.04095	6.36316	8.49976	12.7543
397.5	0.902527	1.60028	3.98199	6.08325	8.16779	12.3805
398.5	1.34503	1.82758	3.93048	6.37323	8.46631	12.5948
399.5	1.2066	1.77216	3.89673	6.52002	8.47742	12.3796
400.5	0.806152	1.64984	3.67249	6.0553	8.28925	12.3288
401.5	1.30389	1.66577	3.93665	6.21844	8.5271	12.2396
402.5	1.02869	1.30957	3.76154	5.95044	8.37903	11.9185
403.5	1.23	1.78241	3.95587	6.01007	8.53107	12.0662
404.5	0.801514	1.66528	3.7962	6.12708	8.17358	11.9648
405.5	0.50824	1.41608	3.52802	5.90039	8.02917	11.6934
406.5	0.83313	1.74677	3.70685	6.14935	8.28125	11.9203
407.5	0.995239	1.47894	3.55884	5.92932	8.26245	11.7404
408.5	0.877197	1.54089	3.71307	5.90356	7.98767	11.7678
409.5	0.927917	1.47418	3.59094	5.64722	7.96198	11.6252
410.5	1.05145	1.65887	3.86255	5.66235	7.95587	11.732
411.5	1.05963	1.69391	3.73004	5.9129	8.04962	11.7318
412.5	1.38574	1.70111	3.72443	6.02557	8.11279	11.5974
413.5	1.40356	1.71686	3.97528	6.04059	8.26685	11.5276
414.5	1.31506	1.67255	3.50476	5.90448	8.11517	11.453
415.5	1.43024	1.81177	3.46985	5.65021	7.84271	11.6456
416.5	1.45581	1.81683	3.77576	5.83527	7.87671	11.3831
417.5	1.12872	1.46912	3.2785	5.65814	7.45984	10.8938
418.5	1.1001	1.23022	3.20856	5.62811	7.42194	11.0143
419.5	0.826355	0.981812	3.18964	5.29895	7.12946	10.7266
420.5	1.01001	1.64703	3.36627	5.57019	7.54095	11.0161
421.5	0.888245	1.47046	3.18439	5.59113	7.46289	10.8322
422.5	0.93811	1.53339	3.19019	5.36261	7.49139	10.9175
423.5	0.983032	1.85315	3.47791	5.39105	7.82166	10.9526
424.5	0.362915	1.42755	3.25311	5.05377	7.50635	10.5091
425.5	0.352112	0.960144	2.86212	4.83643	7.04889	10.2127
426.5	0.241821	1.19928	3.17999	5.1441	7.00385	10.4521
427.5	0.262817	1.25134	2.87128	4.76862	6.67499	10.1204
428.5	0.333618	1.39862	2.89575	4.73785	6.99115	10.1357
429.5	0.892883	1.63416	3.17908	5.11969	7.37042	10.1207
430.5	0.263245	1.44232	2.83075	5.08295	7.0766	10.1838
431.5	0.338501	1.66217	2.93829	5.12195	7.16504	10.261
432.5	0.350342	1.26678	2.7746	5.08569	7.07831	10.2236
433.5	0.397461	1.4978	2.8631	4.99805	6.98035	10.2716
434.5	0.434326	1.31622	2.86853	4.82471	7.03876	10.1246
435.5	0.535583	1.23669	2.40369	4.58734	6.85754	9.75214
436.5	0.238586	1.21881	2.63354	4.60822	7.11945	9.86731
437.5	0.126465	1.10742	2.44202	4.38507	6.73181	9.74445
438.5	0.078125	1.36926	2.51984	4.64972	6.88782	10.0228
439.5	0.343506	1.35455	2.66785	4.68347	6.92926	9.94653
440.5	1.01453	1.42761	2.98553	4.82373	7.25323	10.1673
441.5	0.51593	1.32251	2.67151	4.58142	6.79504	9.51746
442.5	0.908569	1.46069	2.93073	4.83722	6.93188	9.82996
443.5	0.823059	1.71478	3.19507	5.0899	7.19769	10.075
444.5	-0.0385132	1.1073	2.29382	4.17786	6.44836	9.35986
445.5	0.350403	1.46722	2.60199	4.48596	6.56537	9.49091
446.5	0.259644	1.26489	2.62512	4.30853	6.71326	9.44092
447.5	0.140747	1.10754	2.48499	4.44946	6.26172	9.23004
448.5	0.272949	1.08972	2.51984	4.59149	6.2785	9.12994
449.5	0.574402	1.0108	2.59882	4.99487	6.48291	9.23163
450.5	0.823181	1.55902	2.64996	4.92743	6.52374	9.53839
451.5	0.779358	1.34692	2.58636	4.61761	6.36676	9.15729
452.5	0.49231	1.4212	2.57227	4.4364	6.3454	9.2572
453.5	0.548401	1.10193	2.37097	4.28021	6.3869	9.01453
454.5	0.497437	1.04395	2.16742	4.1076	6.41028	8.91693
455.5	0.476929	1.10468	2.19647	4.39868	6.17218	8.91974
456.5	0.327087	1.23236	2.28339	4.31396	6.27179	8.82214
457.5	0.444336	0.970581	2.06183	4.02814	5.9408	8.75006
458.5	0.539063	1.06366	2.25415	4.13306	6.00427	8.73706
459.5	0.583435	1.38696	2.25702	4.44666	6.15222	8.83649
460.5	0.568115	1.39063	2.45776	4.49207	6.10529	8.65747
461.5	0.511658	0.963196	2.3443	4.31152	6.15125	8.74341
462.5	0.417175	1.13318	2.21545	4.13843	5.83777	8.62891
463.5	0.629578	1.20508	2.35492	4.30768	6.28088	8.71686
464.5	0.65979	1.16235	2.54291	4.40161	6.37518	8.95996
465.5	1.03467	1.64154	2.59253	4.54572	6.79443	9.04926
466.5	1.19806	1.80231	2.95087	4.66351	6.55682	9.25189
467.5	1.04791	1.69434	2.69843	4.75281	6.22162	9.30023
468.5	0.908508	1.45538	2.44556	4.48169	5.94061	8.95099
469.5	0.92511	1.32538	2.43097	4.59161	6.0592	8.91461
470.5	0.609375	1.01526	2.28833	4.37061	5.9364	8.76532
471.5	0.62262	0.983032	2.16534	4.30688	5.8465	8.75226
472.5	0.52124	0.787354	2.15833	3.95349	5.60046	8.65961
473.5	0.747375	1.21991	2.66449	4.20355	5.73688	8.65668
474.5	0.078186	0.898926	2.03467	3.80145	5.24976	8.04724
475.5	0.313293	0.9422	2.07422	3.80914	5.38605	8.38562
476.5	0.562195	1.31866	2.6286	4.34778	5.74554	8.59583
477.5	0.682007	1.4917	2.81146	4.13873	5.83771	8.55646
478.5	0.572998	1.29828	2.50604	3.63391	5.54279	8.31995
479.5	0.259705	0.829956	2.61499	3.84894	5.49481	8.20557
480.5	0.13739	1.12238	2.40173	3.90771	5.35815	7.98749
481.5	0.280701	1.22418	2.69537	4.13464	5.57666	8.18079
482.5	0.131897	1.19031	2.45721	4.13269	5.37128	8.01154
483.5	0.131592	1.35291	2.41809	3.82849	5.52155	8.09473
484.5	0.0239258	1.3515	2.21173	3.97369	5.28448	8.03253
485.5	0.286316	1.03619	2.17407	3.96472	5.31519	8.13586
486.5	0.468628	1.37909	2.40851	4.01996	5.50427	8.43103
487.5	0.474609	1.06244	2.65759	3.88666	5.45905	8.13727
488.5	0.613708	1.26178	2.68622	4.23596	5.63727	8.11652
489.5	0.711731	1.21094	2.36578	3.76276	5.62244	8.29376
490.5	0.364868	1.34467	2.38684	3.80823	5.6319	8.00098
491.5	0.651672	1.49786	2.58112	3.87268	5.79919	8.32568
492.5	0.423401	1.2019	2.43219	3.53003	5.68781	8.15143
493.5	0.474792	1.16248	2.7439	3.93689	5.41492	8.11761
494.5	0.486084	1.06763	2.40283	3.74158	5.31073	8.11102
495.5	0.322449	1.00159	2.44604	3.4837	5.25305	7.94867
496.5	0.628601	1.29651	2.60223	3.82245	5.33984	7.8067
497.5	0.46814	1.15808	2.71002	3.86298	5.24713	7.96143
498.5	0.316284	0.93927	2.33997	3.79205	4.95258	7.72552
499.5	0.164307	0.777466	2.05701	3.31848	4.73877	7.42456
500.5	0.302856	0.707764	2.26208	3.7124	4.76495	7.4502
501.5	0.156372	0.574646	2.20551	3.6499	4.67981	7.44135
502.5	0.0450439	0.622681	2.04376	3.51624	4.74725	7.26184
503.5	0.194946	1.03577	2.19525	3.71667	4.90479	7.41144
504.5	0.218811	0.984985	2.24194	3.55756	4.78973	7.22498
505.5	0.071106	0.9198	2.02808	3.19189	4.65399	7.30841
506.5	0.221985	0.787048	2.1037	3.46552	4.83368	7.23163
507.5	0.0962524	0.62207	1.9436	3.41461	4.4884	7.2226
508.5	0.663452	0.638672	2.39966	3.3988	5.12762	7.48816
509.5	0.447693	0.893494	2.28973	3.31555	5.22699	7.02338
510.5	0.0877075	0.849304	2.0144	3.57874	4.96252	6.98859
511.5	-0.0854492	0.492676	1.97351	3.47015	4.5824	7.09644
512.5	-0.0930786	0.690308	1.88818	3.30792	4.65601	6.67676
513.5	0.0785522	0.510376	1.47992	3.12933	4.72003	6.95367
514.5	0.123352	0.870117	1.80408	3.20361	4.71191	6.97943
515.5	0.431213	1.10022	2.19873	3.65472	4.9787	7.17389
516.5	0.370117	0.985535	2.26416	3.80963	5.07007	7.34943
517.5	0.505615	1.00183	1.99353	3.604	4.89771	7.00885
518.5	0.410156	1.04449	2.05737	3.30469	4.76849	7.10248
519.5	0.547607	1.21838	2.14508	3.33209	4.84076	7.11871
520.5	0.0626221	0.740723	1.98114	2.96637	4.59418	6.79327
521.5	0.166565	1.0188	1.88287	3.05652	4.60254	6.73706
522.5	0.187256	1.05322	1.68774	3.15363	4.56006	6.63129
523.5	-0.160583	0.805664	1.60791	2.95654	4.1618	6.3338
524.5	0.219482	1.09094	1.93848	3.211	4.59064	6.44977
525.5	0.249207	0.734802	1.72449	3.10181	4.48126	6.401
526.5	0.484619	0.829834	1.82874	3.23145	4.8866	6.58429
527.5	0.20105	0.829834	1.46552	2.92426	4.75946	6.69147
528.5	0.399841	0.925964	1.77948	3.07123	4.74585	6.51416
529.5	0.117615	0.675781	1.55249	2.70782	4.28162	6.40668
530.5	0.276062	1.08411	1.86121	2.79596	4.56897	6.29785
531.5	0.217834	0.908386	1.76636	2.77856	4.52661	5.89862
532.5	0.135681	0.813293	1.9082	2.75201	4.38544	6.11957
533.5	0.251282	0.603516	1.86285	2.85071	4.47742	5.83673
534.5	0.172058	0.784424	1.8924	2.8349	4.43726	6.13019
535.5	0.475525	0.93158	2.09943	3.04572	4.45636	6.08173
536.5	0.559143	1.0163	2.2522	3.09753	4.68579	6.38812
537.5	0.414673	0.721313	1.82269	3.02301	4.23578	6.25482
538.5	0.740234	0.962646	1.97675	3.32813	4.45282	6.53448
539.5	0.409424	0.905518	1.76361	3.23584	4.43079	6.46234
540.5	0.337708	0.716614	1.69568	3.18085	4.32324	6.09595
541.5	0.278931	0.971375	1.66992	2.75653	4.27344	5.823
542.5	-0.0489502	0.898438	1.51611	2.8327	4.26172	5.66809
543.5	0.138855	0.651855	1.97278	2.62665	3.91443	5.64716
544.5	-0.119812	0.625854	1.62628	2.48291	3.67926	5.62714
545.5	-0.157227	0.894958	1.49567	2.59094	3.97131	5.53082
546.5	0.17804	0.947021	1.75592	2.39355	4.0415	5.55933
547.5	0.548584	1.44421	1.99677	2.88062	4.26813	5.90723
548.5	0.25531	1.2132	1.84906	2.81598	4.03986	5.82159
549.5	0.620117	1.22748	2.06671	3.18158	4.15118	6.04218
550.5	0.403442	1.01917	1.92572	2.86389	4.19952	5.80371
551.5	0.1521	0.797852	1.83051	2.95392	4.03137	5.5661
552.5	0.146667	0.746338	1.53601	2.83917	4.02228	5.72894
553.5	0.285156	0.965149	1.72211	2.97498	4.10809	5.93463
554.5	0.313293	0.783081	1.82941	2.84058	4.06915	5.98627
555.5	0.0945435	0.712463	1.67145	2.76215	3.80878	5.56238
556.5	0.0303345	0.762146	1.84125	2.63916	4.04333	5.73138
557.5	0.208313	0.604126	1.66058	2.6424	3.79883	5.62091
558.5	0.424805	0.7146	1.48651	2.86328	3.91864	6.42938
559.5	0.0748291	1.87524	2.39917	4.15222	4.90674	2.21161
560.5	0.128113	0.207642	0.245544	0.710327	1.94049	7.02435
561.5	-0.112	0.0236206	0.589478	1.02307	2.40723	6.70215
562.5	0.0681152	0.378845	0.912903	1.46814	3.09222	6.56689
563.5	0.0655518	0.350769	0.900146	1.83691	3.13214	6.31531
564.5	0.357117	0.696899	0.799927	2.12305	3.24109	5.88574
565.5	0.338257	0.413269	0.861694	1.90466	3.39923	5.67896
566.5	0.724854	0.600586	0.832275	1.34778	2.73578	7.38495
567.5	0.726563	1.13208	1.99384	2.6333	3.97156	5.47986
568.5	0.895813	1.25421	2.18762	2.96777	4.29193	4.65015
569.5	0.117432	0.637756	2.02197	2.77563	3.95056	1.50244
570.5	0.296387	0.774292	1.91815	2.77216	3.73932	1.8645
571.5	0.274719	0.39801	1.31677	2.39636	3.45117	2.44855
572.5	0.221741	0.535767	1.50372	2.19519	3.18268	2.62817
573.5	0.436096	0.615173	1.45679	2.11414	3.22198	2.30109
574.5	0.625549	0.810242	1.71503	2.27826	3.44861	2.99939
575.5	0.344116	0.862732	1.33044	1.82318	3.32983	2.59534
576.5	0.326233	0.824402	1.41266	1.98187	3.18683	2.49976
577.5	0.37146	0.752991	1.15637	1.94244	2.89459	2.30707
578.5	0.167908	0.500061	1.27869	1.83905	3.05151	2.26178
579.5	0.10791	0.537292	1.24658	1.9035	2.91656	2.25604
580.5	0.0211182	0.526001	1.02167	1.85236	2.91211	2.1134
581.5	0.169922	0.458801	1.33893	1.81628	2.92841	2.23328
582.5	0.339966	0.592102	1.1875	2.16711	3.02222	1.97272
583.5	0.0475464	0.546692	0.897156	2.12268	2.82739	2.02478
584.5	0.0697632	0.714111	1.11847	2.04382	3.07678	2.30017
585.5	-0.329834	0.0872192	0.628052	1.71246	2.49774	1.65277
586.5	0.0894165	0.504456	1.09625	1.77997	2.72491	2.13977
587.5	0.147522	0.254578	1.05585	1.86755	2.8576	4.31213
588.5	0.459717	0.692078	1.37158	2.14886	3.25391	4.94635
589.5	0.456848	0.513	1.27783	2.2489	3.32635	4.90308
590.5	0.236206	0.458435	1.16528	1.92181	3.21594	4.54272
591.5	0.425415	0.393738	1.15381	2.16522	3.3042	4.7652
592.5	0.47467	0.640625	1.45966	2.42847	3.21045	4.52698
593.5	0.205872	0.572998	1.33032	2.30017	3.1189	4.49744
594.5	0.219299	0.44812	1.33771	2.15887	3.28137	4.4483
595.5	0.178589	0.661316	1.37164	2.26685	2.94867	4.61755
596.5	0.593201	0.804565	1.54517	2.40222	3.11694	4.8443
597.5	0.520325	0.712463	1.505	2.28717	3.18866	4.68231
598.5	0.44165	0.477783	1.35999	1.78375	3.05219	4.58221
599.5	0.309448	0.455078	1.30554	1.98828	3.11035	4.47906
600.5	0.437683	0.610718	1.27899	1.94159	2.97986	4.44855
601.5	0.129578	0.505127	1.32788	1.76276	2.82587	4.26288
602.5	0.343445	0.467773	1.17535	2.1178	2.99756	4.08453
603.5	0.171692	0.40979	1.40961	2.203	2.93109	4.17194
604.5	0.255127	0.643799	1.32831	2.16998	3.08203	4.10657
605.5	0.323669	0.39325	1.51843	2.20184	3.16846	4.42279
606.5	-0.0514526	0.609619	1.41071	2.10443	2.78699	4.33752
607.5	0.260132	0.43927	1.39453	1.93677	3.0163	4.10419
608.5	0.36145	0.602234	1.21179	2.11914	2.9292	4.2522
609.5	0.252747	0.738708	1.34674	1.85272	3.07312	4.56738
610.5	0.377075	0.840881	1.59222	2.00824	3.19397	4.70917
611.5	0.5495	0.807007	1.69342	2.03583	3.06146	4.39813
612.5	0.423035	0.703369	1.15875	1.83289	2.92188	4.28754
613.5	0.353943	0.878601	1.32733	1.81213	3.02698	4.20685
614.5	-0.0831909	0.672791	1.10168	1.57123	2.73853	4.0777
615.5	0.0493164	0.46283	1.28076	1.65863	2.62646	3.96454
616.5	0.0808105	0.342651	1.19366	1.79053	2.92993	4.28265
617.5	0.0965576	0.253662	1.04144	1.58807	2.76068	4.37518
618.5	0.0889893	0.425232	0.860901	1.49457	2.79309	4.34564
619.5	0.465637	0.626465	1.14508	1.91693	3.05322	4.23785
620.5	0.308411	0.471252	1.03912	1.9317	3.0636	4.04919
621.5	0.240479	0.330444	0.985291	1.81073	2.79224	4.38788
622.5	-0.108276	0.553467	0.786255	1.7196	2.4566	4.05243
623.5	0.0248413	0.467285	1.01202	1.6062	2.34399	4.14026
624.5	0.123657	0.577637	1.24115	1.99811	2.80713	4.29639
625.5	0.223267	0.697449	1.3844	2.005	2.97314	4.22595
626.5	-0.0819702	0.614319	1.14539	1.93701	2.87494	3.81995
627.5	0.131775	0.88916	1.21552	2.10175	3.03699	3.97949
628.5	0.17511	0.609131	1.12866	1.63708	2.75	3.95941
629.5	0.000671	0.473206	1.06866	1.63367	2.54047	4.0824
630.5	-0.42511	0.613953	0.657043	1.41846	2.24683	3.87671
631.5	-0.14502	0.2901	0.845825	1.50519	2.49933	4.28748
632.5	-0.316772	0.27655	0.489136	1.09491	2.17914	3.79828
633.5	-0.436035	0.445129	0.236755	1.18268	2.33319	3.96301
634.5	-0.0220337	0.458923	0.272705	1.31323	2.45294	4.04688
635.5	0.0668945	0.482666	0.188416	1.31012	2.58362	3.77539
636.5	0.150818	0.480225	0.780029	1.54553	2.47791	3.82483
637.5	-0.0436401	0.295654	0.780762	1.13904	2.64374	3.70917
638.5	0.00244	0.151184	0.54895	0.947693	2.34888	3.69086
639.5	0.0625	0.317627	0.943237	1.54565	2.4231	3.77399
640.5	0.189575	0.129578	0.919006	1.32648	2.51953	3.92792
641.5	0.136841	0.174011	0.851624	1.6701	2.53632	4.32678
642.5	-0.00214	0.398682	0.861816	1.52502	2.39935	4.21857
643.5	-0.260742	0.172119	0.671082	1.39075	2.32452	3.72229
644.5	0.0869141	0.373718	0.71106	1.50604	2.48712	3.9812
645.5	0.109985	0.406799	0.809998	1.3512	2.45898	4.09436
646.5	0.179199	0.240784	0.680664	1.27069	2.11029	4.02026
647.5	-0.149719	0.619812	0.678589	1.40405	2.20825	3.95416
648.5	-0.288452	0.328552	0.262634	1.26532	1.75018	3.71283
649.5	-0.0718994	0.551697	0.394531	1.45239	2.03137	3.88245
650.5	-0.0584717	0.562744	0.41272	1.35065	2.27405	3.80096
651.5	0.115295	0.582886	0.415833	1.59473	2.70721	4.26477
652.5	-0.205566	0.438232	0.676025	1.21631	2.33765	3.95892
653.5	0.0926514	0.918213	0.717834	1.7132	2.43713	4.11151
654.5	0.0737915	0.712036	0.833496	1.82739	2.46033	3.88196
655.5	-0.166138	0.654968	0.817627	1.43127	2.02289	3.9314
656.5	-0.106567	0.483765	0.80658	1.45813	1.91559	3.95551
657.5	-0.404968	0.536011	0.711304	1.16681	2.28406	3.69702
658.5	-0.404297	0.267212	0.538818	1.07092	2.29578	3.45502
659.5	-0.494019	0.45929	0.664429	0.976746	1.99329	3.39032
660.5	-0.426453	0.310303	0.668823	1.00214	2.17188	3.63385
661.5	-0.200928	0.566101	1.12439	1.29736	2.43408	3.54095
662.5	-0.312195	0.498962	0.896423	0.847351	2.41888	3.79846
663.5	0.244324	0.807861	1.19159	1.33661	2.81256	4.17847
664.5	0.340637	0.849731	1.18457	1.06604	2.73212	4.05811
665.5	-0.0069	1.01941	0.865601	0.986267	2.18604	3.76288
666.5	-0.100464	0.700195	0.81842	0.927124	2.20703	3.60815
667.5	0.201538	0.351746	0.711975	0.654541	2.35461	3.63159
668.5	-0.179871	0.343933	0.534485	0.91864	2.31415	3.60138
669.5	0.102356	0.88623	0.704407	0.872253	2.19812	3.48035
670.5	-0.330811	0.742065	0.716736	1.02191	2.20978	3.46887
671.5	0.411987	1.02191	1.07013	1.46423	2.38196	4.00232
672.5	0.244568	0.883545	1.13251	1.56219	2.38361	3.93475
673.5	0.020752	0.437378	0.673279	1.07416	2.35272	3.68689
674.5	0.128113	0.776978	1.0141	1.30634	2.57764	3.59528
675.5	0.16925	0.727722	0.840698	1.50891	2.42712	3.69012
676.5	0.338318	0.652893	0.738586	1.07404	2.07147	3.37842
677.5	0.247986	0.662354	0.762329	1.2973	2.18408	3.25043
678.5	-0.0371704	0.593567	0.819336	0.974854	1.92804	3.27612
679.5	-0.0933228	0.481689	0.627747	0.972961	2.09387	3.24377
680.5	-0.0747681	0.286804	0.783752	1.10297	2.03253	3.20715
681.5	-0.245178	0.458496	0.661255	0.955444	2.08289	2.97272
682.5	-0.149292	0.447693	0.947021	1.10956	2.08807	3.38837
683.5	-0.0133057	0.0521851	0.58728	0.845947	1.8515	2.91364
684.5	0.182678	0.175659	0.447021	0.950623	1.76416	3.17438
685.5	-0.156982	-0.169312	0.0944214	0.801697	1.38574	2.98126
686.5	0.0682983	0.0438232	0.387146	1.08722	1.66547	3.13892
687.5	-0.10498	0.174133	0.651794	0.766907	1.52759	3.08386
688.5	-0.5979	0.0110474	0.395264	0.631042	1.30713	3.00049
689.5	-0.25769	0.371948	0.486633	0.873535	1.64832	3.04553
690.5	-0.0936279	0.256592	0.556274	0.801697	1.72308	3.13434
691.5	0.11322	0.339111	0.694397	1.30774	2.10535	3.4563
692.5	0.18512	0.758545	0.69043	1.32666	2.00879	3.33545
693.5	-0.153503	0.261719	0.408997	1.28052	1.52881	3.37402
694.5	-0.104187	0.22406	0.498108	1.07379	1.44812	3.3783
695.5	0.027832	0.346802	0.498474	0.986816	1.62292	3.27234
696.5	0.0745239	0.579468	0.575317	1.25153	1.49805	3.55389
697.5	0.238831	0.493225	0.322937	1.07104	1.48621	3.29553
698.5	-0.0150757	0.525269	0.449768	0.933899	1.59839	3.43573
699.5	0.0944214	0.5578	0.611511	1.21338	1.68488	3.42578
700.5	0.131165	0.512268	0.592468	0.948547	1.59174	3.57684
701.5	0.0258789	0.223206	0.537231	1.00677	1.78009	3.41479
702.5	-0.235046	0.239868	0.441284	0.794373	1.69098	3.27826
703.5	-0.117859	0.196777	0.0869751	0.465515	1.52789	3.21863
704.5	-0.210571	0.310425	0.278015	0.568176	1.58209	3.09302
705.5	-0.241455	0.373413	0.484009	0.825745	1.75757	3.35809
706.5	-0.0856934	0.329956	0.444885	1.10529	1.95715	3.39764
707.5	-0.0631714	0.580872	0.36322	1.04688	1.6474	3.38165
708.5	0.304016	0.704834	0.658875	0.854797	1.64978	3.26917
709.5	0.0397949	0.688354	0.405029	0.731934	1.64514	3.37701
710.5	0.202209	0.627258	0.164673	0.886658	1.84491	3.57813
711.5	-0.062561	0.36792	0.437073	0.630493	1.84778	3.53656
712.5	-0.177734	0.380615	0.25708	0.514282	1.7124	3.50677
713.5	0.101379	0.351318	0.411804	0.572266	1.76434	3.34717
714.5	0.252747	0.637939	0.344055	0.4953	1.70502	3.33307
715.5	0.263	0.821777	0.559509	0.262451	1.56506	3.44812
716.5	0.00647	0.492432	0.267517	0.514099	1.52991	3.42468
717.5	0.0897827	0.433167	0.367126	0.549622	1.67871	3.44879
718.5	0.350159	0.421143	0.621155	0.494812	1.82996	3.25897
719.5	0.148621	0.518066	0.716919	0.722107	1.69684	3.18188
720.5	0.085144	0.40155	0.786133	0.555298	1.86487	3.11975
721.5	0.151733	0.446411	0.760559	0.669983	1.77521	3.2608
722.5	0.160828	0.674133	0.701111	0.765686	1.81445	3.36145
723.5	0.112488	0.653687	0.645142	0.44812	1.56604	3.12469
724.5	-0.132141	0.612366	0.796448	0.90155	1.63623	3.14697
725.5	0.311646	0.860107	0.837769	1.10645	1.95544	3.37604
726.5	0.257446	0.535767	0.806519	0.790894	1.76404	3.14392
727.5	0.322815	0.593018	0.873657	0.854797	1.51855	3.01074
728.5	0.0688477	0.516052	0.561035	1.02759	1.59607	3.11737
729.5	0.305969	0.357544	0.385559	1.03259	1.74805	2.88519
730.5	-0.0357056	0.447998	0.669678	0.712402	1.86884	3.07074
731.5	-0.140076	0.341309	0.529785	0.870667	1.84558	3.23883
732.5	-0.266907	0.151489	0.378113	0.635254	1.53235	3.21069
733.5	0.374329	0.38208	0.705261	0.877014	1.99884	3.38525
734.5	0.279236	0.249573	0.770813	0.688782	1.73584	3.34381
735.5	0.0548706	-0.132813	0.447205	0.592163	1.55579	3.22137
736.5	0.0258789	-0.101624	0.38269	0.586548	1.59125	3.27179
737.5	0.358521	0.495544	0.392273	0.906067	1.78741	3.27856
738.5	0.0571289	0.195862	0.212341	0.710449	1.50385	3.30225
739.5	0.219238	0.534851	0.52594	0.906433	1.62207	3.42535
740.5	0.224487	-0.00775	0.518616	0.434448	1.35498	3.09821
741.5	-0.259705	0.218811	0.497498	0.684814	1.28925	3.03516
742.5	-0.0936279	0.358582	0.524109	0.549561	1.50238	3.29523
743.5	-0.304138	0.00525	0.13855	0.264709	1.50879	2.90381
744.5	-0.391113	0.0825806	0.465515	0.237	1.17529	2.87036
745.5	-0.0968018	0.150024	0.453857	0.50647	1.01678	2.95001
746.5	0.0900269	0.0673218	0.51062	0.43042	1.0434	2.98785
747.5	0.0595703	-0.0245972	-0.0626221	0.735046	1.17053	2.88293
748.5	-0.341064	-0.0963135	0.0101929	0.54541	1.03583	2.63861
749.5	0.0974731	0.247009	0.274536	1.08636	1.46387	2.93976
750.5	0.414124	0.352112	0.510742	0.862549	1.51447	2.94586
751.5	0.363831	0.326904	0.544556	0.692871	1.51221	3.09137
752.5	0.149841	0.423218	0.449951	0.629578	1.5423	3.45551
753.5	0.12616	0.318665	0.516541	0.74707	1.50043	3.2464
754.5	0.142456	0.305237	0.622803	0.534424	1.64307	3.06982
755.5	-0.285522	0.127502	0.329346	0.577759	1.45361	2.93756
756.5	-0.015686	0.154297	0.654358	0.450928	1.40637	2.97601
757.5	-0.187012	-0.0157471	0.195557	0.43042	1.40277	2.79553
758.5	-0.365723	-0.281921	0.523865	0.382568	1.22729	2.90448
759.5	-0.2005	0.16217	0.650085	0.461243	1.11694	3.02814
760.5	-0.15863	0.0110474	0.203247	0.654663	1.08923	2.79132
761.5	-0.309448	-0.116882	0.107849	0.389099	1.00458	2.84894
762.5	-0.351746	-0.126953	0.055542	0.178101	1.09473	2.47351
763.5	-0.440002	0.026123	0.253174	0.200256	0.98053	2.49707
764.5	-0.226135	-0.0759277	0.140747	0.178162	1.0321	2.5517
765.5	-0.0494385	0.18988	0.290894	0.532227	1.46301	2.65881
766.5	-0.384827	-0.161194	0.0420532	0.09845	0.784119	2.48047
767.5	-0.368225	-0.160278	0.0201416	0.346619	0.999329	2.57733
768.5	0.0288696	0.374146	0.613831	0.916931	1.40393	3.10822
769.5	0.0548706	0.0753174	0.478638	0.53595	1.24872	2.94476
770.5	0.0269165	0.18219	0.639343	0.709473	1.70441	2.9502
771.5	-0.307251	0.117065	0.606689	0.365845	1.47443	2.797
772.5	-0.161133	0.0671387	0.56665	0.396362	1.14087	2.71051
773.5	0.036377	0.202209	0.433777	0.786194	1.38599	2.78973
774.5	-0.434326	0.364441	0.255432	0.602234	1.2276	2.54944
775.5	0.0925293	0.37439	0.293213	0.740356	1.36481	2.71136
776.5	-0.193909	-0.00653	0.206482	0.463135	1.30457	2.6236
777.5	-0.297974	0.257935	0.059082	0.546753	0.956238	2.44092
778.5	-0.294189	0.191162	-0.264038	0.537354	0.969055	2.45667
779.5	-0.613403	0.305115	-0.165894	0.276123	0.636536	2.47253
780.5	-0.294739	0.330078	0.166504	0.643188	1.15149	2.87738
781.5	-0.225281	0.204346	0.501587	0.820251	1.2973	2.82727
782.5	-0.406311	0.103638	0.42218	0.804199	1.3327	2.91681
783.5	-0.698608	-0.290283	0.21759	0.171204	0.980103	2.37396
784.5	-0.459961	-0.105652	-0.065979	0.116333	0.721436	2.55426
785.5	-0.471497	-0.320679	0.250549	0.00183	0.670593	2.44904
786.5	-0.667847	-0.285828	-0.0610352	-0.0578	0.665405	2.5741
787.5	-0.795654	-0.929688	-0.311279	-0.38654	-0.31195	2.07227
788.5	-0.334839	-0.302979	0.0877686	0.025574	1.18445	2.32092
789.5	-0.372742	-0.301819	0.0281372	-0.00995	1.13177	2.27637
790.5	-0.286621	-0.10553	-0.0291748	0.016663	1.04749	2.37555
791.5	0.0432739	-0.198669	0.131592	0.029907	1.06281	2.54919
792.5	-0.0813599	-0.300903	0.286926	-0.00262	0.983337	2.28241
793.5	-0.277771	0.0111694	0.466675	0.48645	1.255	2.68884
794.5	-0.350586	-0.111145	0.17749	0.223633	1.11768	2.43665
795.5	-0.369141	-0.24939	0.101257	0.156555	0.884766	2.38446
796.5	-0.253418	-0.081604	0.443298	0.265259	0.962891	2.60028
797.5	-0.350037	-0.152527	0.30249	0.155212	0.917908	2.71368
798.5	-0.0377808	0.0726318	0.475586	0.398865	1.17078	2.76538
799.5	-0.120972	-0.0335693	0.408813	0.250732	0.872253	3.02551
800.5	-0.283875	0.0445557	0.424255	0.455261	1.26099	2.87201
801.5	-0.171143	0.405029	0.598694	0.480103	1.49359	2.9386
802.5	-0.55658	-0.0313721	0.387817	0.165161	1.11243	2.49426
803.5	-0.0999756	0.0369873	0.255066	0.216858	1.31909	2.59894
804.5	-0.256104	-0.0234985	0.384888	0.364136	1.37073	2.59192
805.5	-0.293152	-0.0742798	0.281006	0.013916	1.1297	2.41437
806.5	0.118469	0.105774	0.442993	0.217224	1.40405	2.71301
807.5	-0.0911255	0.169617	0.433105	0.197937	1.31592	2.63068
808.5	-0.0587158	0.0464478	0.257996	0.214233	0.940674	2.42487
809.5	-0.335083	0.0407715	0.11499	-0.07477	0.834656	2.27008
810.5	-0.25531	0.133484	0.293213	0.206848	1.17126	2.33868
811.5	-0.12146	0.119568	0.218384	0.213318	1.12061	2.31866
812.5	0.0509033	0.0513306	0.497009	0.431396	1.60077	2.84436
813.5	0.187012	0.292664	0.499451	0.477539	1.44806	2.74091
814.5	0.24469	0.623535	0.612671	0.352844	1.60211	2.94299
815.5	-0.00256	0.421326	0.36676	0.175659	1.45728	2.37225
816.5	0.114014	0.396179	0.410217	0.297546	1.37506	2.58099
817.5	-0.0980835	0.0950317	0.475525	0.034424	1.39703	2.56927
818.5	-0.0310669	-0.101685	0.473816	0.288818	1.31561	2.55658
819.5	-0.134583	-0.122314	0.349731	0.230835	1.23944	2.44427
820.5	-0.180847	-0.256042	0.261963	0.255371	0.970825	2.52649
821.5	0.0547485	-0.031311	0.268066	0.253357	1.03436	2.40033
822.5	-0.111389	0.0101318	0.620667	0.29425	1.14606	2.56097
823.5	0.270142	0.407227	0.653503	0.641174	1.47565	2.71722
824.5	0.0944214	0.0958252	0.153809	0.35791	1.25696	2.47241
825.5	0.290894	-0.0714722	0.28833	0.637085	1.47437	2.59296
826.5	-0.0499878	-0.22876	0.105896	0.316589	1.23889	2.28589
827.5	-0.103821	0.000366	0.305969	0.522461	1.09277	2.3252
828.5	-0.160156	0.0953369	0.485046	0.662781	1.30707	2.38708
829.5	0.228577	0.163208	0.302795	0.480835	1.11987	2.37317
830.5	0.335388	0.556152	0.537048	0.711243	1.57489	2.51904
831.5	0.0895386	-0.0471191	0.00464	0.411987	1.08344	2.21045
832.5	0.0786743	0.323853	0.0854492	0.303833	1.35162	2.42285
833.5	-0.212341	0.114807	0.169556	0.260315	1.20331	2.55627
834.5	-0.06604	0.0492554	0.0726318	0.414185	0.954651	2.4931
835.5	0.0159302	-0.178345	0.44635	0.267456	1.1402	2.62396
836.5	-0.105	-0.412415	-0.114868	-0.17859	0.69989	2.19183
837.5	0.386353	-0.178223	-0.0709839	0.182922	0.939331	2.42291
838.5	-0.0358276	-0.0706177	0.0285645	-0.00427	0.763367	2.52191
839.5	0.324402	0.0643921	0.37738	0.347839	0.997192	2.60571
840.5	-0.0427856	0.0297241	0.0609741	0.294556	0.859741	2.54163
841.5	0.264038	-0.0150146	-0.0237427	-0.08398	0.922546	2.47803
842.5	0.335938	0.190735	0.116577	0.046692	1.14648	2.7536
843.5	0.173035	0.178589	0.341858	-0.01941	1.32813	2.60376
844.5	0.311218	0.132324	0.271851	-0.10754	1.12592	2.35632
845.5	0.223877	0.15033	0.206909	0.118591	1.28204	2.21167
846.5	-0.0404	-0.144287	0.12677	0.246277	1.0321	2.03375
847.5	0.00262	-0.0230103	-0.031189	0.114502	0.777771	2.16956
848.5	0.100952	-0.0518799	0.0773315	0.134338	1.05573	2.15625
849.5	0.227783	0.156799	-0.0617676	0.232056	0.685791	2.31396
850.5	0.0475464	0.0565796	0.0438232	0.239258	0.760925	2.39923
851.5	-0.0351563	-0.114807	-0.0110474	0.277405	0.633118	2.31604
852.5	-0.1297	-0.177917	0.18988	0.065186	0.929077	2.16803
853.5	-0.138611	-0.0928955	-0.0194092	-0.03809	1.04614	2.03656
854.5	-0.0255127	-0.00391	0.2052	0.4104	1.11328	2.14862
855.5	0.259155	-0.0780029	0.306763	0.410767	1.23389	2.31689
856.5	-0.022644	-0.153381	0.0487061	0.254456	0.80249	2.44824
857.5	-0.0237427	0.23761	0.163025	0.247437	1.0531	2.25238
858.5	-0.179016	0.108154	0.191528	0.213623	1.20227	2.35608
859.5	0.279053	0.180481	0.214294	0.50238	1.25928	2.30481
860.5	0.223572	-0.0578613	0.286255	0.525757	1.04254	2.30688
861.5	0.129333	0.0426025	0.306763	0.422485	1.02216	2.05798
862.5	0.457825	-0.0469971	0.358948	0.388794	1.31555	2.33179
863.5	0.447998	-0.0233765	0.389343	0.365784	1.08032	2.25116
864.5	0.00665	-0.0611572	0.219788	0.284424	1.04205	2.32886
865.5	0.0880737	0.140442	0.115234	0.199463	1.02679	2.39471
866.5	-0.132385	0.0742188	0.306702	0.519409	1.05133	2.13116
867.5	-0.121582	-0.133972	0.10083	0.435364	1.01227	2.2934
868.5	-0.110596	-0.384583	-0.100586	0.03595	0.804504	2.15369
869.5	0.5224	-0.277466	0.0157471	0.279175	0.925598	2.34576
870.5	0.157898	-0.344543	0.00726	0.052063	0.985474	1.89136
871.5	0.143494	-0.141113	0.138123	0.25708	1.07404	2.26752
872.5	-0.00867	-0.320374	-0.254822	0.192444	0.941284	2.03558
873.5	0.254639	-0.124695	0.225647	0.262085	1.00488	2.28296
874.5	0.365234	0.00775	0.213257	0.525696	1.21283	2.60852
875.5	0.452026	0.112854	0.010498	0.367981	1.25055	2.58337
876.5	0.283752	0.0889893	-0.0982056	0.382446	0.804871	2.24463
877.5	0.406677	0.101868	-0.237305	0.090149	0.791138	2.18365
878.5	0.502747	0.338684	0.102112	0.044128	0.868469	2.29449
879.5	0.25824	0.188416	0.117554	0.147095	0.889709	2.2085
880.5	0.23761	0.286926	0.0251465	0.348938	0.92157	2.24286
881.5	0.148682	0.0421753	0.0238037	0.234192	1.03925	2.09375
882.5	0.309875	0.00543	0.043396	0.335144	1.08026	2.33325
883.5	0.202698	0.156616	0.12677	0.299255	1.11047	2.31177
884.5	0.323853	0.238831	0.0464478	0.246948	1.12848	2.62732
885.5	0.309143	0.0371094	0.166931	0.121033	1.05371	2.3175
886.5	0.520508	0.30896	0.138916	0.298523	1.24597	2.64978
887.5	0.309021	-0.0733032	-0.327576	0.163269	1.013	2.34814
888.5	0.370178	0.0157471	-0.163025	0.153198	1.10065	2.42865
889.5	0.494263	-0.0603027	-0.0349731	0.014648	1.20306	2.3764
890.5	0.132996	-0.0338135	-0.0358276	0.127747	1.24445	2.12756
891.5	0.398682	0.630005	-0.0775146	0.140686	1.04724	2.09601
892.5	0.510315	0.542908	-0.162659	-0.13702	1.17554	2.05005
893.5	0.703308	0.378052	0.331909	-0.11542	1.52209	2.16144
894.5	0.347961	0.129517	-0.211365	-0.31769	0.990723	1.83887
895.5	0.382019	0.232178	-0.142578	0.238098	0.978394	2.12134
896.5	0.432617	0.423706	0.00995	0.592651	1.32141	2.35413
897.5	0.273254	0.33844	-0.105347	0.463806	0.855469	1.9967
898.5	0.157104	0.21875	-0.160095	0.151489	0.65863	2.00281
899.5	0.281616	0.172852	-0.238586	0.149597	1.03204	2.08813
900.5	0.253357	-0.168152	-0.482239	0.260742	0.740417	1.94196
901.5	0.0641479	-0.234436	-0.401917	0.221802	0.685791	1.83661
902.5	-0.0562134	-0.203247	-0.394287	0.045654	0.634521	1.71472
903.5	-0.131531	-0.0776367	-0.320313	0.079041	0.951965	1.7428
904.5	-0.0661011	-0.182068	-0.198792	0.100586	1.10748	1.64703
905.5	-0.126526	-0.298279	-0.0864258	-0.01471	0.673889	1.7641
906.5	0.259155	-0.00598	0.268311	0.354919	1.14209	2.15173
907.5	0.129089	-0.081665	-0.0717773	0.387146	0.600159	1.85315
908.5	0.479858	0.0339966	0.0960083	0.531982	1.15887	2.10968
909.5	0.186951	-0.0825195	-0.210144	0.26947	1.07477	2.26129
910.5	0.420837	0.140991	-0.191833	0.285706	0.954773	2.41241
911.5	0.504028	0.0623779	-0.155334	0.434509	1.29547	2.3692
912.5	0.627625	0.270996	0.172974	0.274048	1.22632	2.60303
913.5	0.454102	0.367432	-0.0689697	0.468262	1.11218	2.43909
914.5	0.391541	0.137939	-0.18042	0.184875	1.1358	2.49091
915.5	0.628601	0.424133	0.313538	0.423401	1.4361	2.68964
916.5	0.391113	0.317261	-0.0710449	0.312256	1.17163	2.55829
917.5	0.526917	0.33551	0.171936	0.747742	1.12115	2.27747
918.5	0.480835	0.178711	0.0960693	0.516357	1.05786	2.32214
919.5	0.539368	0.0684814	-0.0187988	0.171265	1.03888	2.26038
920.5	0.385437	0.238831	0.217468	0.54248	1.2132	2.04889
921.5	0.475647	-0.0337524	0.0794067	0.217041	1.05444	2.05219
922.5	0.401855	0.109314	0.191956	0.233826	0.901794	1.9267
923.5	0.481567	0.113708	0.366638	0.430237	0.858398	2.02167
924.5	0.302856	0.36145	0.557678	0.376953	0.930176	2.25323
925.5	0.134399	0.147644	0.541199	0.194458	0.743652	2.08337
926.5	0.581665	0.395508	0.775269	0.375	1.17505	2.29059
927.5	0.264343	0.166077	0.352783	0.233154	1.31647	2.15771
928.5	0.417908	0.431458	0.312012	0.00525	1.4068	2.26941
929.5	0.463989	0.499512	0.471436	0.011108	1.33228	2.02435
930.5	0.118042	0.56366	0.517212	0.122864	1.25323	2.05322
931.5	0.193787	0.353821	0.102539	-0.0564	1.07056	1.95856
932.5	0.343872	0.236755	0.0103149	0.214783	1.08038	2.01587
933.5	0.317993	0.324463	0.223877	0.159302	1.15662	2.16156
934.5	0.00854	0.3349	-0.12616	-0.00427	1.15607	2.08783
935.5	-0.172119	0.403137	0.202881	0.233704	1.10046	2.35773
936.5	-0.0952759	0.383118	0.413879	0.323425	0.879272	2.15289
937.5	-0.342102	-0.0603638	-0.0667725	-0.02722	0.806702	1.71808
938.5	0.000244	0.309082	0.318542	0.207031	1.01709	2.10114
939.5	-0.109497	0.166504	0.268005	0.410095	0.874756	2.16321
940.5	-0.169128	0.0413818	0.349365	0.588989	0.864319	2.26276
941.5	-0.197632	-0.0117798	0.19342	0.520386	0.930237	2.0022
942.5	0.268494	0.477112	0.260803	0.769897	1.05023	2.2796
943.5	0.0383301	0.324951	0.351196	0.378723	1.03485	2.16864
944.5	0.0842285	0.115417	-0.0289307	0.088806	0.835388	1.85303
945.5	-0.281433	0.131531	0.112305	0.026367	0.631165	1.7923
946.5	-0.326965	0.358032	-0.202576	0.105835	0.76123	1.87903
947.5	-0.185547	0.507324	0.11261	0.52417	1.03198	2.06659
948.5	-0.0719604	0.592041	0.220947	0.287842	1.10028	2.13135
949.5	-0.0750122	0.43335	0.357239	0.472107	1.20947	2.00897
950.5	-0.231262	0.166748	0.259705	0.134705	0.776855	1.74207
951.5	-0.10022	0.3349	0.294312	0.47644	0.972412	2.01575
952.5	-0.0309448	0.204529	0.192566	0.517029	0.841187	2.07599
953.5	-0.484741	-0.245728	0.321533	0.018066	0.682007	1.72577
954.5	-0.138489	0.350403	0.195923	0.36676	0.800781	1.92841
955.5	-0.273865	0.0203857	-0.0421143	-0.06067	0.422424	1.78723
956.5	-0.175049	0.124146	0.0725098	0.052429	0.68634	1.98596
957.5	0.0960083	0.0766602	0.152466	0.235596	0.706909	2.01678
958.5	0.174316	0.174255	0.0690918	0.532471	0.812805	1.83722
959.5	0.289246	0.128418	0.394592	0.516296	1.19165	2.24237
960.5	0.0618286	-0.0189209	0.319885	0.57251	1.11475	2.00616
961.5	0.22937	0.193848	0.228088	0.569641	1.16687	2.10144
962.5	-0.00146	0.190613	0.147217	0.608643	1.04285	2.06439
963.5	0.289001	0.036377	0.0650024	0.545227	1.25922	1.99573
964.5	0.337219	-0.0317993	0.126099	0.332336	1.33118	2.16608
965.5	0.32959	0.231384	0.376282	0.556213	1.32098	2.19714
966.5	-0.223328	-0.170227	0.121521	0.045105	1.02979	1.75671
967.5	-0.012085	-0.164856	0.0835571	0.348877	0.890137	2.15509
968.5	0.0205688	0.226318	0.0726318	0.622375	0.924438	2.02673
969.5	-0.364929	-0.218933	-0.276855	0.226807	0.746643	1.54767
970.5	-0.233887	-0.352173	-0.38147	0.022278	0.815674	1.75519
971.5	-0.0333252	-0.302673	-0.213379	-0.03168	0.831787	1.66467
972.5	-0.0489502	-0.187927	-0.0479736	0.034058	0.955505	1.60339
973.5	-0.112305	-0.0548096	-0.223877	-0.01117	0.820496	1.65619
974.5	0.352844	0.149109	-0.0198975	0.16803	1.15637	1.91449
975.5	0.342773	0.352905	0.124817	0.00189	1.21991	2.02557
976.5	0.167358	0.510132	0.114624	0.046082	1.10559	2.00159
977.5	0.102112	0.266968	0.104919	-0.04205	1.04614	2.0304
978.5	0.199829	0.140991	0.174255	0.092163	0.88385	2.13251
979.5	0.339905	0.276855	0.326538	0.285828	1.09662	2.24188
980.5	0.234497	0.400208	0.394043	0.087219	1.31451	1.96582
981.5	0.300842	0.343201	0.383484	0.270264	1.20148	2.01721
982.5	0.51062	0.126404	0.281799	0.261536	1.43878	2.26849
983.5	0.2724	0.458069	0.269653	0.572815	1.20361	2.0791
984.5	0.113464	0.25592	0.274475	0.407349	1.18835	2.05341
985.5	0.542786	0.258606	0.262634	0.46936	1.38226	2.51379
986.5	-0.0178223	-0.0656128	-0.00653	0.343811	0.636292	2.05872
987.5	0.0698242	0.148071	0.238831	0.317627	1.00861	2.62463
988.5	-0.123108	-0.200439	-0.0697021	0.032654	0.814941	2.05371
989.5	-0.0481567	-0.138062	-0.327698	0.189636	0.828369	2.14233
990.5	0.209106	0.0817871	-0.268311	0.291687	0.917786	2.40479
991.5	0.18811	0.204346	-0.160706	0.129517	1.13623	2.26727
992.5	0.352661	0.268372	0.0233154	0.094238	0.91925	2.38672
993.5	0.499451	0.334351	0.28418	0.018066	1.0462	2.54663
994.5	0.432861	0.22937	0.00256	-0.17743	1.27203	2.27368
995.5	0.695984	0.518127	0.185181	0.262512	1.23059	2.48285
996.5	0.360962	0.326172	-0.0758057	0.07135	0.674255	2.08911
997.5	0.213257	0.0701904	-0.242004	-0.02747	0.707825	1.89557
998.5	0.437317	0.0681152	0.0153198	0.09668	0.826904	1.80731
999.5	0.460693	0.242126	0.0724487	-0.03491	0.713379	1.95282
1000.5	0.245789	0.362793	0.145935	0.23468	0.759766	1.96033
1001.5	0.479736	0.425537	0.268494	0.142517	0.723511	2.1947
1002.5	0.553711	0.645752	0.108948	0.07074	0.751404	2.2215
1003.5	0.574646	0.869263	0.281067	0.293152	0.955139	2.54425
1004.5	0.361084	0.42157	0.143677	0.229248	0.73175	2.51575
1005.5	0.461243	0.736206	0.147888	0.431152	0.769592	2.57477
1006.5	0.489868	0.533203	0.100952	0.181641	0.826294	2.41681
1007.5	0.349792	0.388245	0.130493	0.366577	1.08142	2.49542
1008.5	0.496155	0.841553	0.0229492	0.428589	1.27795	2.49829
1009.5	0.633484	0.474182	0.268433	0.412781	1.13898	2.35175
1010.5	0.875	0.835876	0.473328	0.53241	1.54816	2.62225
1011.5	0.75824	0.771484	0.557617	0.579712	1.698	2.52899
1012.5	0.70343	0.559937	0.40271	0.600891	1.12054	2.65515
1013.5	0.863953	0.616455	0.475647	0.645752	1.1557	2.59607
1014.5	0.486023	0.661987	0.340332	0.577576	1.14752	2.52124
1015.5	0.271973	0.385681	0.0700684	0.158813	0.934448	2.32599
1016.5	0.410339	0.466553	0.17334	0.713806	1.12787	2.57074
1017.5	0.394653	0.466309	-0.0292358	0.493774	0.838074	2.42694
1018.5	0.228149	0.394714	-0.386841	0.241638	0.585754	1.98236
1019.5	0.492981	0.57373	-0.0787964	0.446472	0.583252	2.20325
1020.5	0.277771	0.327576	-0.374207	0.296082	0.44519	1.99561
1021.5	-0.0184937	-0.0274048	-0.522156	-0.08514	0.184204	1.67297
1022.5	0.0306396	0.339111	-0.242004	0.131653	0.460327	1.85718
1023.5	0.256	0.489136	-0.0939941	0.070252	0.583496	2.22144
1024.5	-0.245605	0.174438	-0.254883	-0.03186	0.251038	2.27026
1025.5	0.122437	0.347961	-0.0227051	0.00903	0.558838	2.31592
1026.5	-0.274658	0.0805664	-0.0821533	0.043091	0.424805	2.10114
1027.5	0.0405884	0.205383	-0.121277	0.14093	0.243896	2.14954
1028.5	-0.239075	0.0821533	-0.158142	0.037964	0.599792	2.0741
1029.5	-0.0703125	0.191589	0.208069	0.12323	0.684509	2.29388
1030.5	-0.0794	0.453003	0.0247192	-0.14258	0.677185	2.00677
1031.5	-0.11969	0.421265	-0.269592	0.133057	0.698792	1.76801
1032.5	-0.0136719	0.358032	0.0584717	0.12146	0.683655	2.17633
1033.5	-0.31604	0.0535278	-0.332886	0.131287	0.593079	1.80231
1034.5	-0.128662	0.231567	-0.245789	-0.20612	0.484497	1.76917
1035.5	-0.295044	-0.00293	-0.426514	-0.13263	0.436707	1.59058
1036.5	-0.0759888	0.200317	0.03479	0.34906	0.95752	2.27545
1037.5	-0.218811	0.182373	-0.144714	-0.05249	0.666626	2.16559
1038.5	-0.190979	0.100159	-0.0291748	0.080811	1.02295	2.13544
1039.5	-0.126892	-0.0349121	-0.249695	-0.39929	0.629211	1.83679
1040.5	-0.0547485	-0.0393677	-0.404297	-0.31751	0.660767	1.91321
1041.5	0.322144	-0.0115967	-0.473328	-0.14008	1.02948	2.22852
1042.5	0.375732	0.338501	-0.287415	0.042664	1.0769	2.5116
1043.5	0.524536	0.325195	-0.00262	-0.16229	0.791077	2.26208
1044.5	0.490967	0.403015	-0.00244	-0.112	0.846008	2.2298
1045.5	0.0329	0.485046	-0.105225	-0.15265	0.817993	2.40735
1046.5	0.336121	0.549133	-0.152405	-0.2478	0.592896	2.36981
1047.5	0.333069	0.546509	-0.22583	-0.00494	1.07275	2.23535
1048.5	0.475464	0.594666	0.0391235	-0.10999	0.707214	2.34131
1049.5	0.461182	0.479858	0.156067	-0.07233	0.599304	2.00098
1050.5	0.126892	0.621399	0.112976	-0.06732	0.385559	1.96716
1051.5	0.371521	0.37085	0.0465088	0.247375	0.40448	2.03271
1052.5	0.0223389	0.28894	-0.0996704	-0.17395	0.049927	1.90222
1053.5	0.0179443	-0.234802	-0.259521	-0.34381	0.033264	1.77087
1054.5	0.268188	-0.0714722	-0.204651	-0.00964	0.113037	1.90546
1055.5	0.293213	0.0892944	0.00861	0.188293	0.496582	2.04626
1056.5	0.353943	-0.0775146	-0.26001	-0.02148	0.47937	2.11664
1057.5	0.402954	0.111145	-0.224182	-0.07269	0.734192	2.20721
1058.5	0.422913	0.304199	0.216675	-0.04626	0.833496	2.26245
1059.5	0.503906	0.291382	0.225647	0.033447	0.953735	2.05829
1060.5	0.453674	0.232361	-0.182495	-0.19751	0.666687	2.02966
1061.5	0.431335	0.187317	-0.218018	-0.17236	0.553528	2.17535
1062.5	0.599792	0.125488	0.0411377	-0.03918	0.78125	2.22589
1063.5	0.523071	0.41272	-0.0859375	0.019348	0.864441	2.27246
1064.5	0.526489	0.102844	-0.0603638	-0.2467	0.422913	2.1076
1065.5	0.210815	-0.174	-0.228149	-0.36786	0.514832	1.85846
1066.5	0.0124512	-0.208252	-0.177185	-0.21765	0.632324	2.08105
1067.5	-0.0320435	-0.3172	-0.544861	-0.23181	0.45929	1.94489
1068.5	-0.15509	-0.342712	-0.301331	-0.12836	0.316833	1.73993
1069.5	-0.373901	-0.592834	-0.384338	-0.19165	0.4552	1.56091
1070.5	0.100403	-0.564514	-0.488892	-0.02258	0.191223	1.58527
1071.5	-0.0921021	-0.403687	-0.217712	-0.26477	0.033264	1.53522
1072.5	-0.123596	-0.458923	-0.468811	-0.55756	-0.01056	1.52881
1073.5	-0.0720825	-0.300537	-0.442932	-0.20154	0.296265	1.76941
1074.5	0.343384	0.013855	-0.0346069	-0.21405	0.350891	1.93262
1075.5	-0.195496	-0.440613	-0.615723	-0.33899	0.112122	1.76794
1076.5	0.126343	-0.115173	-0.222595	-0.2243	0.382751	1.65503
1077.5	0.178223	-0.10791	-0.223145	0.017822	0.271912	1.64154
1078.5	-0.123108	-0.169006	-0.218567	0.015259	0.435486	1.78998
1079.5	-0.112793	-0.302612	-0.235168	-0.00488	0.268372	2.05798
1080.5	-0.0430298	-0.0406494	-0.117188	-0.08191	0.402344	2.23865
1081.5	0.0587769	-0.101624	-0.351257	0.015381	0.532959	1.73474
1082.5	0.250671	0.128174	-0.00848	0.049072	0.711792	1.97418
1083.5	-0.161072	-0.288757	-0.417236	-0.32892	0.154053	1.42731
1084.5	-0.0294189	-0.0648193	-0.301392	-0.45026	0.360413	1.52777
1085.5	-0.0508423	-0.0118408	-0.171936	0.016724	0.506531	1.79901
1086.5	-0.0397949	-0.0675049	-0.0353394	0.092163	0.429626	1.94128
1087.5	-0.372192	-0.121033	-0.282471	-0.01947	0.31366	1.75348
1088.5	0.102478	0.0991821	0.0352173	0.288025	0.56366	1.87061
1089.5	0.0976563	-0.0974731	-0.124756	0.027893	0.295105	1.74878
1090.5	-0.114502	-0.26947	-0.417969	-0.44525	0.080261	1.47638
1091.5	-0.0222778	-0.243347	-0.196228	-0.40546	-0.06891	1.68237
1092.5	0.0966797	-0.150635	-0.290955	-0.29291	0.069519	1.54352
1093.5	0.0971069	-0.0652466	-0.381104	-0.22669	0.049866	1.76477
1094.5	0.156372	0.189514	0.0128784	0.062317	0.501465	2.03992
1095.5	0.339355	0.155029	-0.0203247	0.174316	0.619751	2.19873

## Sheet: 3C
	Jurkat TCR9a
Tetramer-PE (μg/ml)	C*08:02-G12D9mer	C*05:01-G12D-A18L	(MdFI)
0.625	103.4	26.4
1.25	137.4	60.4
2.5	145.4	103.4
5	142.4	162.4
10	168.4	210.4
20	180.4	226.4
40	201.4	245.4
	Jurkat 10
Tetramer-PE (μg/ml)	C*08:02-G12D10mer	C*05:01-G12D10mer
40	201.3	392.3
20	181.3	200.3
10	168.3	141.3
5	142.3	83.3
2.5	123.3	51.3
1.25	106.3	28.3
0.625	73.3	12.3

## Sheet: 3D
C0802-g12d10mer	Response units
Time (s)	1.25	2.5	5.0	10	20	40	[TCR10] mM
1.5	-0.61864	-0.03455	-0.33288	0.388954	-0.74471	-0.38096
2.5	-0.44528	0.176865	0.028919	0.478477	-0.56829	0.105066
3.5	-0.48239	0.287491	-0.06686	0.414177	-0.5594	0.084665
4.5	-0.5752	0.026474	-0.15234	0.196754	-0.68705	-0.38799
5.5	-0.4238	0.67984	0.481647	0.347466	-0.04041	0.291071
6.5	-0.41917	0.400543	0.131504	0.38372	-0.29556	0.172495
7.5	-0.27271	0.21405	0.055561	0.508949	-0.31907	0.034281
8.5	-0.22395	0.33139	0.215794	0.443092	-0.24807	0.136301
9.5	-0.15511	0.214066	0.250492	0.57943	-0.23704	-0.06212
10.5	0.00589	0.59906	0.223225	0.766289	-0.08517	0.456934
11.5	-0.37073	-0.2	-0.02302	0.650215	-0.47109	-0.3093
12.5	-0.1391	-0.25461	0.183689	0.496223	-0.55642	-0.07993
13.5	-0.45598	-0.44905	-0.35576	0.233177	-0.78993	-0.35056
14.5	-0.47504	-0.39859	-0.35974	0.017784	-0.62228	-0.33971
15.5	-0.3727	-0.33971	-0.36078	0.098793	-0.64806	-0.48948
16.5	-0.30028	-0.52033	-0.47625	0.176369	-0.88987	-0.31988
17.5	-0.38622	-0.25102	-0.39608	0.318321	-0.53916	-0.01792
18.5	-0.22434	-0.16992	-0.71499	0.214653	-0.44892	-0.10541
19.5	-0.46669	-0.08673	-0.32609	0.293327	-0.72323	-0.18119
20.5	-0.19153	0.090622	0.175938	0.634346	-0.05329	0.049128
21.5	-0.08498	0.071152	-0.03883	0.502464	0.19796	0.311777
22.5	-0.31004	0.156631	0.013294	0.455833	0.020149	0.366846
23.5	-0.31232	0.317337	0.29752	0.174034	-0.06791	0.184351
24.5	-0.28661	0.022415	0.461658	0.068794	0.012886	-0.26072
25.5	-0.40591	-0.04088	0.479069	-0.11387	-0.20268	-0.38058
26.5	-0.343	-0.21727	0.160023	0.079506	0.025307	-0.46851
27.5	-0.38457	-0.14188	-0.10841	-0.0826	-0.02251	-0.54688
28.5	0.177231	0.116714	0.387211	0.118492	0.091637	0.050623
29.5	-0.03613	0.017105	0.032505	-0.14309	-0.15495	-0.14245
30.5	-0.37691	-0.16844	-0.0278	-0.01205	-0.07571	-0.33414
31.5	-0.18254	-0.004	0.084232	-0.31918	-0.00462	-0.27338
32.5	-0.28769	0.142105	-0.1564	-0.1219	-0.0286	-0.13135
33.5	-0.2787	-0.2375	-0.31443	0.025597	-0.21601	-0.27665
34.5	0.328323	0.17514	-0.0503	0.013481	0.14045	0.074122
35.5	0.129807	0.094681	-0.12913	0.025734	0.019356	0.315439
36.5	0.307144	0.219284	-0.01062	0.079506	-0.08822	0.155909
37.5	0.372299	0.238113	0.152515	0.238869	0.116554	0.323725
38.5	0.475357	0.118591	0.082432	0.321373	0.262169	0.425211
39.5	0.02739	-0.22781	-0.08787	-0.01112	-0.00384	0.14094
40.5	0.014664	-0.12813	0.032993	-0.12627	-0.13665	0.246866
41.5	0.057297	0.00327	-0.04695	-0.08637	0.075615	0.440531
42.5	-0.093	-0.06757	-0.03749	-0.19346	0.310539	0.16781
43.5	-0.31636	-0.52484	-0.40178	-0.37862	0.00951	0.154596
44.5	-0.30614	-0.52156	-0.40796	-0.04011	-0.02995	0.1374
45.5	-0.2812	-0.38484	-0.35099	-0.32502	-0.18971	-0.19289
46.5	-0.22098	-0.4418	-0.13765	-0.09504	0.021309	-0.000494
47.5	-0.11221	-0.16687	-0.11888	0.057015	0.031487	0.145304
48.5	-0.42239	-0.23657	-0.78373	-0.06973	-0.41166	0.115686
49.5	-0.42856	-0.4861	-0.89398	-0.478	-0.33073	-0.08323
50.5	-0.02809	-0.24571	-0.77827	-0.33714	-0.33276	0.128428
51.5	0.072235	-0.31491	-0.85858	-0.31666	-0.36289	-0.03321
52.5	-0.0955	-0.36922	-0.67263	-0.21119	0.015373	-0.11095
53.5	-0.08957	-0.47328	-0.94177	-0.69112	-0.12508	-0.05274
54.5	0.104172	-0.11093	-0.90085	-0.77871	-0.01728	0.035303
55.5	-0.33659	-0.24181	-0.83046	-1.00597	-0.2936	0.080286
56.5	-0.30997	-0.43439	-0.82678	-0.70527	-0.40743	-0.08494
57.5	-0.01207	-0.25546	-0.72812	-0.31831	0.183357	-0.21039
58.5	-0.02176	-0.19814	-0.56851	-0.48354	-0.25852	-0.64298
59.5	0.177536	0.00859	-0.22218	-0.26769	-0.23002	-0.2222
60.5	0.162537	-0.0829	-0.12756	-0.24964	-0.45493	-0.26134
61.5	0.011993	-0.59673	-0.44999	-0.59339	-0.79079	-0.45315
62.5	-0.16747	-0.41173	-0.28726	-0.57526	-0.50422	-0.0804
63.5	-0.32707	-0.45969	-0.72084	-0.55409	-0.48759	-0.32455
64.5	-0.06287	0.080917	-0.31202	0.149956	-0.19737	-0.25931
65.5	0.062302	-1.46484	-0.39631	-0.04824	-1.03321	-0.53712
66.5	-1.2016	12.6534	0.682911	23.7904	59.8936	75.4662
67.5	13.3125	29.4376	50.1378	77.7495	112.679	146.065
68.5	18.2752	37.307	62.3849	94.6059	133.847	168.141
69.5	19.2469	38.124	65.6555	97.8979	137.878	172.644
70.5	18.7951	37.9881	66.3427	98.3952	139.33	173.944
71.5	18.8275	38.0509	66.3567	98.9036	139.605	174.273
72.5	18.4288	37.6933	66.3387	98.7369	139.721	174.13
73.5	17.8365	37.0718	65.833	98.0375	139.163	173.511
74.5	17.367	36.6338	65.0863	97.7975	139.061	173.233
75.5	16.7007	36.173	64.4242	96.794	138.455	172.8
76.5	16.1135	35.6034	64.0637	96.5885	138.073	172.169
77.5	15.7271	35.1894	63.6769	96.2096	137.66	171.439
78.5	15.5403	34.7762	62.8879	95.9789	137.585	171.253
79.5	15.1389	34.1778	61.8745	95.723	137.05	170.813
80.5	14.995	33.5864	60.7277	95.0655	136.54	170.111
81.5	15.0045	33.7247	60.7178	95.0559	136.622	170.117
82.5	14.6633	33.4192	60.6209	95.395	136.274	169.886
83.5	13.8226	32.9477	60.0616	94.6907	135.397	169.534
84.5	14.1322	33.1777	60.1697	94.7716	135.904	169.907
85.5	13.9185	32.9948	59.6279	94.4176	135.621	169.603
86.5	13.4738	32.664	59.2036	93.5283	135.383	169.29
87.5	13.1364	32.2945	58.6594	92.5857	134.914	168.774
88.5	12.8494	31.7621	58.3763	92.0898	134.589	168.211
89.5	12.5128	31.6763	58.4728	91.8123	134.981	168.009
90.5	12.0788	31.4671	57.8431	91.7226	134.354	167.863
91.5	11.7018	31.4707	57.4393	91.4709	134.141	167.646
92.5	11.8439	31.2288	57.5087	91.5215	134.015	167.423
93.5	12.0516	30.8623	57.2337	91.1836	133.908	167.551
94.5	12.1425	30.747	56.8675	91.2336	134.064	167.199
95.5	11.5164	30.2569	56.5583	90.6166	133.528	167.021
96.5	11.4163	30.3166	56.4609	90.6503	133.405	166.867
97.5	10.807	29.7125	55.8358	90.431	133.04	166.278
98.5	11.2693	29.9766	55.6577	90.413	132.977	166.302
99.5	11.2778	29.8362	55.4128	90.2625	132.845	166.297
100.5	11.39	29.7457	55.5741	90.2736	132.892	166.177
101.5	11.4011	29.6695	55.7622	90.1983	132.798	166.436
102.5	11.2639	29.5688	55.71	90.043	132.389	166.066
103.5	10.8385	29.6399	55.3967	89.7264	132.206	165.407
104.5	11.2276	29.5194	55.6071	89.62	132.368	165.697
105.5	10.8775	29.3548	55.8324	89.7925	132.365	165.32
106.5	11.1729	29.3805	55.5825	89.9326	132.174	165.236
107.5	10.8618	29.3524	55.2029	89.6917	132.011	164.162
108.5	10.6379	29.0344	54.8453	89.6406	131.872	163.539
109.5	10.5102	29.0873	54.9674	89.4742	131.346	163.062
110.5	10.3241	29.0308	54.6622	89.1253	131.59	162.754
111.5	10.2913	29.0398	54.472	88.8236	131.795	162.401
112.5	10.2358	28.9997	53.825	88.7886	131.468	162.345
113.5	10.7968	28.967	53.6023	88.5471	131.496	162.048
114.5	10.6185	28.8657	53.9531	88.9152	131.426	162.096
115.5	10.5781	28.6884	54.0895	89.1941	131.412	162.542
116.5	10.3296	28.369	54.2981	89.0324	131.337	161.954
117.5	10.5457	28.7071	54.5304	88.99	131.584	162.228
118.5	10.4714	28.4219	54.4481	88.9314	131.324	161.985
119.5	10.3898	28.3817	54.3521	88.5496	131.375	161.483
120.5	10.1417	28.3658	54.1756	88.5255	131.225	161.333
121.5	9.94058	28.0816	54.0609	88.5436	130.951	160.985
122.5	9.7056	27.6777	53.8744	88.3104	130.656	160.993
123.5	9.82011	28.1919	53.947	88.7722	130.95	161.203
124.5	10.0097	28.1694	54.4934	89.1815	131.322	161.264
125.5	9.87129	27.9579	53.8306	88.7843	130.92	161.093
126.5	9.49942	27.8364	52.1773	89.092	130.918	160.84
127.5	9.66638	28.2813	51.4081	89.567	131.14	161.067
128.5	9.15349	27.8851	51.4117	89.4418	131.023	160.845
129.5	9.58948	27.9493	51.8885	89.097	131.156	161.017
130.5	9.63271	27.698	51.6924	88.9154	131.136	160.821
131.5	9.76396	27.5369	51.9159	89.1601	130.743	160.683
132.5	9.85815	27.6601	52.0429	89.1646	130.527	160.593
133.5	9.52599	27.1777	51.5788	88.9128	130.308	159.834
134.5	9.5938	27.4807	51.648	89.0101	130.685	160.572
135.5	9.63966	27.7748	51.882	89.0415	130.516	161.845
136.5	9.56941	27.548	51.5658	88.7879	130.439	161.675
137.5	9.24309	27.1282	51.684	88.6605	129.976	161.138
138.5	9.642	26.9163	51.9981	88.9854	130.19	161.734
139.5	9.46199	27.1557	51.457	88.7482	130.103	161.418
140.5	9.41551	27.0767	51.4213	88.3714	129.836	161.135
141.5	9.36551	27.1315	51.4968	88.4484	129.865	160.771
142.5	9.17442	27.0058	51.327	88.2415	129.852	160.732
143.5	9.2234	26.9198	51.3943	88.3133	129.443	160.91
144.5	9.24902	26.9827	51.5242	88.6412	128.584	161.346
145.5	9.13637	26.9962	51.4569	88.5962	128.382	161.101
146.5	8.89793	26.7095	51.4995	88.3462	128.323	161.127
147.5	8.89301	26.6132	51.7017	88.4381	128.146	160.924
148.5	8.89684	26.8335	51.6397	88.1941	128.088	160.676
149.5	8.69701	26.5577	51.1742	87.7208	127.611	160.386
150.5	8.8309	26.5865	51.1941	88.0174	127.525	160.502
151.5	8.67184	26.4849	51.3595	87.862	127.497	160.398
152.5	9.02068	26.5795	51.2982	87.9101	127.914	160.73
153.5	9.09747	26.5191	51.249	87.7002	127.675	160.59
154.5	8.95918	26.837	51.0541	87.9329	127.685	160.642
155.5	8.9827	26.7498	50.9877	87.8314	127.65	160.476
156.5	8.74466	26.7638	50.991	87.9203	127.193	160.121
157.5	8.64496	26.5782	50.644	87.4573	126.894	160.026
158.5	8.90135	26.8864	51.0731	87.9162	127.113	160.032
159.5	8.92528	27.0762	51.1629	88.0015	127.394	160.074
160.5	8.83746	26.923	51.016	88.0431	127.254	159.747
161.5	8.7459	26.7995	51.0161	88.1052	127.269	159.966
162.5	8.36433	26.7676	50.9438	87.9058	127.6	159.916
163.5	8.39355	26.5363	50.7938	87.3799	127.141	159.273
164.5	8.54057	26.7802	51.2111	87.8181	127.34	159.885
165.5	8.32419	26.4491	50.7889	87.5197	126.903	159.686
166.5	8.63614	26.3843	51.1663	87.9582	127.192	160.106
167.5	8.47566	26.8306	51.2077	88.1588	127.249	160.206
168.5	8.15872	26.7269	51.3867	88.4189	127.377	160.036
169.5	8.16527	26.9001	51.2016	87.9686	127.101	160.284
170.5	8.17691	26.4931	51.3074	88.1614	127.145	160.045
171.5	8.32956	26.4801	51.4173	88.1863	127.308	160.22
172.5	8.10175	26.4155	50.7851	88.1208	127.233	160.095
173.5	8.28067	26.2852	50.7312	88.2813	127.011	160.258
174.5	8.40013	26.4404	51.01	88.4249	126.997	160.278
175.5	8.39175	26.4835	51.1602	88.4297	127.004	160.434
176.5	8.59448	26.5378	51.0152	88.4183	127.157	160.21
177.5	8.313	26.567	51.33	88.1964	127.152	159.824
178.5	8.45427	26.7623	50.9568	88.1034	126.975	159.693
179.5	8.33777	26.6019	50.8669	87.8821	126.897	159.648
180.5	8.22995	26.3291	50.9565	87.8605	126.627	159.453
181.5	8.40332	26.3055	50.9182	87.7879	126.615	159.671
182.5	8.37514	26.6738	51.3978	88.1694	126.473	159.99
183.5	8.46371	26.6906	51.252	88.2909	126.637	159.844
184.5	8.19917	26.5166	50.9785	88.132	126.812	159.537
185.5	9.06403	30.2687	56.2346	99.5725	149.708	205.176
186.5	1.52551	-0.67172	22.8016	39.5943	46.8374	16.9623
187.5	-10.9675	-14.1593	-9.64436	0.467476	9.18461	9.39733
188.5	-12.1264	-15.9453	-18.7199	-14.4248	-12.5195	-17.5898
189.5	-13.1971	-17.7007	-22.5072	-20.7815	-21.8188	-28.3807
190.5	-13.6073	-17.9037	-23.9709	-23.6513	-25.326	-32.0561
191.5	-13.9659	-18.6952	-24.7211	-24.9289	-26.3777	-33.0267
192.5	-13.7374	-18.4949	-24.3549	-25.0402	-25.7364	-32.057
193.5	-13.9354	-18.4874	-24.1636	-24.2907	-25.184	-30.8146
194.5	-13.5642	-18.2489	-23.9234	-23.6987	-24.0981	-29.1854
195.5	-13.3157	-17.9404	-23.4157	-23.1544	-22.9805	-27.6559
196.5	-13.0412	-17.266	-22.6136	-22.2869	-21.8972	-26.3949
197.5	-12.9971	-16.7781	-22.2893	-21.6066	-21.3026	-25.4599
198.5	-12.7647	-16.2538	-21.9801	-21.3477	-21.1033	-24.6652
199.5	-12.3375	-15.9608	-21.5825	-20.8709	-20.4341	-24.1002
200.5	-12.4098	-16.1573	-21.5596	-20.7066	-20.27	-23.7783
201.5	-12.4749	-16.6315	-21.6765	-20.9343	-20.5969	-23.6163
202.5	-12.1421	-16.4734	-21.5594	-20.8779	-20.4653	-23.3442
203.5	-12.1666	-16.2547	-21.406	-20.8664	-20.2283	-22.9435
204.5	-11.8502	-16.1531	-21.0738	-20.7885	-20.004	-23.0306
205.5	-11.4496	-16.0165	-20.7736	-20.3629	-19.7689	-22.5685
206.5	-11.7145	-16.022	-20.8592	-20.4008	-19.7738	-22.855
207.5	-11.7055	-15.832	-20.6587	-20.1427	-19.4257	-22.6786
208.5	-11.3938	-16.1327	-20.5146	-20.0495	-19.2845	-22.3321
209.5	-11.4514	-15.7771	-20.2863	-20.3655	-19.5521	-22.6299
210.5	-11.3647	-15.5563	-20.1523	-20.3221	-19.2015	-22.4417
211.5	-11.1782	-13.182	-19.7541	-19.8356	-19.3137	-22.4168
212.5	-11.4318	-16.2409	-20.0509	-20.5728	-19.211	-23.3101
213.5	-11.6067	-16.9506	-20.2343	-20.2838	-19.5624	-21.5827
214.5	-11.2617	-15.6007	-20.0119	-20.0232	-19.2026	-22.2259
215.5	-11.3461	-15.4593	-20.1463	-20.1146	-19.5003	-22.7049
216.5	-11.5264	-15.5747	-20.3668	-20.4021	-19.5163	-22.6991
217.5	-11.522	-15.497	-20.44	-20.2934	-19.3595	-22.4837
218.5	-11.5897	-15.6641	-20.6889	-20.2199	-19.5241	-22.7866
219.5	-11.6007	-15.542	-20.2209	-20.3359	-19.5232	-22.607
220.5	-11.3846	-14.9724	-20.2182	-20.28	-19.3626	-22.3787
221.5	-11.7456	-16.2909	-20.6722	-20.2821	-19.5771	-23.2712
222.5	-11.1031	-15.6837	-20.5098	-20.7811	-19.4398	-21.8207
223.5	-11.3353	-15.5201	-20.6929	-20.4685	-19.3974	-22.2706
224.5	-11.2929	-15.7295	-20.4808	-20.5439	-19.4961	-22.6705
225.5	-11.3435	-15.9841	-20.4946	-20.6758	-19.5263	-23.0915
226.5	-11.211	-15.7447	-20.3083	-20.646	-19.6136	-22.8803
227.5	-11.6047	-15.305	-20.4292	-20.6956	-19.8242	-22.787
228.5	-11.7871	-15.5945	-20.4213	-20.8532	-19.7416	-23.0037
229.5	-11.2581	-15.6219	-20.2435	-20.373	-19.4042	-22.6559
230.5	-11.5217	-15.8237	-20.3375	-20.7863	-19.7258	-22.5167
231.5	-11.3968	-15.5561	-20.0909	-20.5053	-19.422	-22.7861
232.5	-11.9225	-15.8157	-20.8343	-21.1408	-19.6714	-22.9841
233.5	-11.4967	-15.8155	-21.0133	-21.5019	-19.5508	-22.807
234.5	-11.8715	-16.0262	-21.0686	-21.5774	-19.5977	-22.8517
235.5	-11.8178	-15.9469	-20.9743	-21.4706	-19.4599	-22.649
236.5	-11.5104	-15.5392	-20.5982	-21.066	-19.1777	-22.3329
237.5	-11.7068	-15.7237	-20.9862	-21.0719	-19.4678	-22.4474
238.5	-11.5786	-15.5339	-20.7686	-21.1406	-19.5935	-22.3794
239.5	-11.7072	-15.4771	-20.8618	-20.8368	-19.6675	-22.3833
240.5	-11.7586	-15.5662	-20.9078	-20.9839	-19.7699	-22.767
241.5	-11.5425	-15.5887	-20.623	-20.7555	-19.254	-22.4592
242.5	-12.0145	-15.8329	-20.7829	-21.2976	-19.4444	-22.7937
243.5	-11.7379	-15.6867	-20.8173	-20.9903	-19.5085	-22.8537
244.5	-11.8226	-15.7145	-20.866	-20.7943	-19.8645	-22.7076
245.5	-12.1016	-15.8911	-21.1788	-21.0725	-19.4896	-22.8198
246.5	-11.8171	-15.9813	-20.9696	-21.2642	-19.468	-22.842
247.5	-11.3851	-15.7313	-20.6873	-20.9039	-19.2426	-22.4172
248.5	-11.6953	-15.8395	-20.7308	-20.9445	-19.3761	-22.3821
249.5	-11.6805	-15.7171	-20.8604	-20.882	-19.2351	-22.7401
250.5	-11.4568	-15.534	-20.8899	-20.8902	-19.477	-22.7882
251.5	-11.3921	-15.3655	-20.7124	-20.9506	-19.2338	-22.749
252.5	-11.6921	-15.4934	-20.4305	-21.0655	-19.1051	-22.6624
253.5	-11.9571	-15.5016	-20.4151	-21.0395	-19.3312	-22.7367
254.5	-11.7411	-15.5381	-20.4867	-20.8915	-19.2353	-22.5564
255.5	-11.7444	-15.4669	-20.6186	-20.9008	-19.0494	-22.7634
256.5	-11.8171	-15.2622	-20.651	-21.2797	-19.1217	-22.8224
257.5	-11.3305	-15.1252	-20.3359	-21.0619	-19.2139	-22.5036
258.5	-11.2014	-15.0067	-20.5635	-20.7393	-19.2206	-22.3885
259.5	-11.1324	-15.1917	-20.2888	-20.699	-18.8919	-22.5173
260.5	-11.6504	-15.69	-20.7047	-20.9278	-19.0779	-22.5749
261.5	-11.2296	-15.7649	-20.6702	-20.962	-18.9366	-22.5288
262.5	-11.312	-15.7084	-20.5233	-20.7682	-18.5524	-22.321
263.5	-11.4436	-15.6712	-20.5844	-21.2187	-18.9125	-22.4606
264.5	-11.6198	-15.7548	-20.5894	-20.9645	-19.2254	-22.7484
265.5	-11.5145	-15.697	-20.446	-20.6635	-18.8912	-22.6393
266.5	-11.445	-15.5899	-20.8937	-20.7732	-19.1544	-22.7389
267.5	-11.3335	-15.4391	-21.0232	-20.8937	-19.5534	-22.6684
268.5	-11.4901	-15.4609	-20.919	-20.8146	-19.2949	-22.9682
269.5	-11.7463	-15.497	-20.8775	-20.671	-19.1468	-22.8332
270.5	-11.4639	-15.1545	-20.8442	-20.4339	-18.925	-22.8961
271.5	-11.4681	-15.267	-20.5848	-20.4282	-19.0048	-22.9928
272.5	-11.588	-15.4516	-20.1629	-20.107	-19.0498	-22.8246
273.5	-11.4148	-15.1684	-20.3082	-20.2017	-18.9963	-22.9297
274.5	-11.313	-15.1597	-20.5258	-19.8889	-18.9269	-22.6347
275.5	-11.2973	-15.342	-20.4895	-19.831	-19.2046	-22.5216
276.5	-11.4268	-15.741	-20.4302	-20.0365	-19.5198	-22.5031
277.5	-11.1303	-15.4851	-20.1647	-20.0435	-19.2408	-22.4127
278.5	-11.1336	-15.9394	-20.4765	-20.1081	-19.5769	-22.6324
279.5	-11.3716	-15.4851	-20.256	-20.1193	-19.3692	-22.596
280.5	-11.21	-15.7844	-20.1361	-20.3239	-19.3128	-22.8431
281.5	-11.3604	-15.6904	-20.3153	-19.7511	-19.5659	-22.8324
282.5	-10.9307	-15.6328	-19.9093	-19.6254	-18.9991	-22.8259
283.5	-11.0912	-15.4569	-20.0814	-19.8183	-18.9989	-22.4535
284.5	-11.2254	-15.3266	-20.1815	-19.8836	-19.0134	-22.4519
285.5	-11.1383	-15.1477	-20.2441	-20.1852	-18.752	-22.2534
286.5	-10.9797	-15.0319	-20.1573	-20.1143	-18.8274	-22.1822
287.5	-10.9211	-15.2516	-20.2666	-20.0735	-18.8006	-22.3745
288.5	-11.1607	-15.5734	-20.4446	-20.2972	-19.2108	-23.0269
289.5	-11.2682	-15.6782	-20.4055	-20.3278	-19.1838	-22.9736
290.5	-11.4828	-15.5956	-20.5816	-20.4248	-19.5784	-22.725
291.5	-11.3993	-15.3408	-20.4764	-20.2839	-19.4828	-22.9974
292.5	-11.0709	-15.1611	-20.1147	-20.1607	-18.9062	-22.7396
293.5	-11.4161	-15.3979	-20.3609	-20.6982	-19.2763	-23.1626
294.5	-11.496	-15.7259	-20.1941	-20.6524	-19.388	-23.2358
295.5	-11.4021	-15.9241	-20.2266	-20.5095	-19.3369	-23.066
296.5	-11.2409	-15.623	-20.0655	-20.5532	-19.2389	-22.8628
297.5	-11.0696	-15.5	-20.3337	-20.6132	-19.2577	-22.8852
298.5	-11.2162	-15.6895	-20.4722	-21.0198	-19.353	-23.0408
299.5	-11.5017	-15.6727	-20.485	-20.9265	-19.3922	-23.0229
300.5	-11.3093	-15.4541	-20.3535	-20.5762	-19.1152	-22.7635
301.5	-11.2116	-15.544	-20.3498	-20.2394	-19.2352	-22.6742
302.5	-11.4117	-15.2191	-20.5422	-20.456	-19.4759	-22.7633
303.5	-11.541	-15.2744	-20.4003	-20.602	-19.386	-22.7999
304.5	-11.3653	-15.2289	-20.4019	-20.2253	-19.3133	-22.3608
305.5	-11.7137	-15.5596	-20.423	-20.5239	-19.4183	-22.5163
306.5	-11.555	-15.2858	-20.4039	-20.6582	-19.3181	-22.1841
307.5	-11.2212	-15.1556	-20.2257	-20.1661	-19.0334	-21.9555
308.5	-11.2013	-15.1429	-20.4173	-20.2974	-19.0595	-22.2963
309.5	-11.5125	-15.0852	-20.5098	-20.2805	-19.2525	-22.2592
310.5	-11.2165	-15.3159	-20.4753	-20.6128	-19.526	-22.3351
311.5	-10.9419	-15.2588	-20.5034	-20.7224	-19.1955	-22.2206
312.5	-10.7	-15.123	-20.1934	-20.5382	-19.0758	-22.0122
313.5	-10.5621	-14.8063	-20.2898	-20.5185	-19.152	-21.9939
314.5	-10.9997	-15.0243	-20.4519	-20.451	-19.1001	-22.1637
315.5	-10.9166	-14.7545	-20.4373	-20.1822	-19.0178	-22.1777
316.5	-10.6472	-14.63	-20.0655	-20.0839	-18.9107	-21.8823
317.5	-10.9931	-14.8786	-20.1909	-20.1903	-18.9038	-22.0667
318.5	-10.88	-14.6935	-20.369	-20.1937	-18.9382	-22.107
319.5	-10.9321	-14.485	-20.3845	-20.2634	-19.3888	-22.3102
320.5	-10.5656	-14.3566	-20.2293	-20.1516	-19.479	-21.999
321.5	-10.6344	-14.3966	-19.9829	-20.0271	-18.8311	-21.7827
322.5	-10.4034	-14.4786	-20.3574	-19.8968	-18.7273	-21.9301
323.5	-10.4584	-14.3099	-20.2017	-19.6598	-18.713	-21.5727
324.5	-10.5462	-14.56	-20.1291	-19.8126	-18.4713	-21.7323
325.5	-10.2705	-14.3281	-19.4519	-19.4112	-18.5915	-21.4626
326.5	-10.4138	-14.7834	-20.1605	-19.8332	-18.5992	-21.9285
327.5	-10.3444	-14.6155	-19.9171	-20.1129	-18.3954	-22.0236
328.5	-10.2057	-14.2899	-19.9342	-19.9466	-18.3765	-21.8847
329.5	-10.2876	-14.0932	-20.1394	-20.1302	-18.3672	-21.6013
330.5	-10.198	-14.2053	-19.8556	-19.7713	-18.1692	-21.7768
331.5	-10.2502	-14.1208	-19.6055	-19.6924	-18.3005	-21.6037
332.5	-10.0836	-14.1541	-19.648	-20.0386	-18.5226	-21.5852
333.5	-10.471	-14.5808	-20.0605	-20.3847	-18.7917	-21.9994
334.5	-10.3178	-14.7216	-20.1554	-20.1428	-18.6146	-22.1261
335.5	-10.4503	-14.5166	-20.0399	-20.3359	-18.5274	-22.3429
336.5	-10.5616	-14.6542	-20.071	-20.4068	-18.8858	-22.1035
337.5	-10.8223	-14.6114	-19.9083	-20.0723	-18.7048	-21.777
338.5	-10.6605	-14.5785	-19.7978	-20.1686	-18.5605	-21.9956
339.5	-10.5594	-14.517	-19.7146	-19.9304	-18.8837	-21.8025
340.5	-10.9924	-15.0148	-20.22	-20.276	-19.062	-22.0027
341.5	-10.8208	-14.6195	-20.1715	-20.1568	-18.6897	-21.8354
342.5	-10.9486	-14.5633	-20.2907	-20.0574	-18.8955	-21.9059
343.5	-10.6236	-14.4928	-19.9638	-19.7665	-18.7348	-21.6292
344.5	-10.5543	-14.5441	-20.1658	-19.6333	-18.7691	-21.6238
345.5	-10.5993	-14.6547	-20.1972	-19.6664	-18.7541	-21.9144
346.5	-10.3343	-14.4457	-20.1201	-19.4643	-18.6229	-21.4895
347.5	-10.3221	-14.4077	-20.1745	-19.6691	-18.4138	-21.5351
348.5	-10.2784	-14.2894	-19.9438	-19.6955	-18.2508	-21.3965
349.5	-10.8746	-14.7012	-20.214	-20.2164	-18.5257	-22.0816
350.5	-10.8699	-14.8486	-20.3709	-20.1954	-18.6266	-21.9892
351.5	-10.5788	-14.8898	-20.279	-19.9528	-18.6522	-21.8587
352.5	-10.5361	-14.9964	-20.1673	-20.0456	-18.7763	-21.8615
353.5	-11.1785	-15.0114	-20.4967	-20.2975	-18.8162	-22.1412
354.5	-10.9486	-14.9146	-20.2552	-20.0976	-18.6142	-22.173
355.5	-10.9491	-15.0728	-20.3986	-20.3193	-18.5695	-22.2263
356.5	-10.5785	-14.9477	-20.204	-20.0057	-18.1428	-21.9737
357.5	-10.7482	-15.0338	-20.3077	-20.2036	-18.336	-21.7983
358.5	-11.0738	-15.0301	-20.4264	-20.4959	-18.6185	-21.9188
359.5	-11.0519	-15.1859	-20.5287	-20.6164	-18.4516	-22.2481
360.5	-10.5833	-14.9644	-20.3701	-20.1979	-18.2742	-22.0332
361.5	-10.7819	-15.207	-20.2358	-20.0595	-18.2008	-22.0421
362.5	-10.3564	-15.1026	-20.1181	-20.1135	-18.4446	-21.867
363.5	-10.7996	-14.9166	-20.4849	-20.0346	-18.3845	-22.081
364.5	-10.3728	-14.6481	-20.2868	-20.1728	-18.2317	-21.6886
365.5	-10.7687	-15.0731	-20.513	-20.2506	-18.5687	-21.952
366.5	-10.9407	-15.1691	-20.5654	-20.4464	-18.5299	-22.0816
367.5	-10.9266	-15.21	-20.6622	-20.6905	-18.5752	-22.2572
368.5	-10.6521	-15.1183	-20.532	-20.2553	-18.7431	-22.0114
369.5	-10.4728	-14.8328	-20.251	-20.1625	-18.7042	-21.7932
370.5	-11.0315	-14.9242	-20.2617	-20.3773	-18.6566	-22.2339
371.5	-10.974	-15.016	-20.5729	-20.5154	-18.6889	-22.254
372.5	-10.9133	-14.5868	-20.2893	-20.3446	-18.4273	-21.9646
373.5	-11.0108	-15.1425	-20.5244	-20.4417	-18.7209	-22.2804
374.5	-10.8962	-15.0777	-20.6427	-20.3674	-18.8505	-22.1081
375.5	-10.4532	-15.2356	-20.482	-20.0769	-18.5321	-22.0648
376.5	-10.8061	-15.0058	-20.1133	-20.0982	-18.5979	-21.6559
377.5	-10.8236	-15.0417	-20.4405	-20.0211	-18.9403	-21.696
378.5	-10.8811	-14.9992	-20.2877	-19.9364	-18.6101	-21.4831
379.5	-10.7507	-14.9691	-20.3657	-20.2225	-18.4022	-21.5253
380.5	-10.5102	-14.7006	-20.1425	-20.1607	-18.4193	-21.8013
381.5	-10.9226	-14.8413	-20.1485	-20.2291	-18.4575	-21.916
382.5	-10.9522	-14.9127	-20.312	-20.2957	-18.4043	-22.0263
383.5	-10.8287	-14.5687	-20.3946	-20.4377	-18.4957	-21.8888
384.5	-10.7845	-14.4193	-20.2564	-20.591	-18.6349	-21.5855
385.5	-10.8391	-14.5629	-20.2839	-20.4624	-18.8609	-21.4374
386.5	-10.9745	-14.2896	-20.2812	-20.2104	-18.7488	-21.3088
387.5	-10.7296	-14.2426	-20.1944	-20.3196	-18.5163	-21.3017
388.5	-10.8831	-14.5437	-20.0976	-20.399	-18.5037	-21.332
389.5	-10.9166	-14.6549	-20.2111	-20.4486	-18.9551	-21.5599
390.5	-10.792	-14.7661	-20.3083	-20.803	-18.9416	-21.8628
391.5	-10.8004	-14.5915	-20.2206	-20.3301	-19.1209	-21.9613
392.5	-10.791	-14.2277	-20.0363	-19.9793	-19.07	-21.6486
393.5	-10.6158	-14.2722	-20.1548	-20.0383	-19.0181	-21.4998
394.5	-10.7538	-14.4239	-19.9944	-20.1163	-19.1449	-21.6775
395.5	-10.7444	-14.1958	-19.8604	-20.1874	-18.9045	-21.7566
396.5	-10.5921	-14.3524	-20.0454	-19.9557	-18.9476	-21.805
397.5	-11.0725	-14.7138	-20.1726	-20.1818	-19.1507	-22.0935
398.5	-10.5616	-14.6182	-20.2794	-19.9142	-19.0462	-21.9517
399.5	-10.452	-14.657	-19.9569	-19.8969	-18.8734	-21.9661
400.5	-10.7319	-14.5134	-20.094	-20.1813	-18.8209	-21.8641
401.5	-10.3744	-14.1872	-19.7035	-20.1146	-18.6281	-21.7428
402.5	-10.4395	-14.2611	-19.9412	-20.2803	-18.978	-21.6702
403.5	-10.8057	-14.4434	-20.1944	-20.2964	-19.0393	-21.846
404.5	-10.4032	-14.3827	-20.0748	-19.9554	-18.8672	-21.66
405.5	-10.2635	-14.2192	-19.7678	-19.9041	-18.5709	-21.5701
406.5	-10.2335	-14.005	-19.7726	-19.5671	-18.8618	-21.3536
407.5	-10.3098	-13.8109	-19.7687	-19.6792	-18.8659	-21.1183
408.5	-10.0799	-13.7303	-19.6091	-19.8143	-18.2438	-21.2383
409.5	-10.3118	-13.9279	-19.6379	-19.6523	-18.0459	-21.2212
410.5	-10.2908	-13.7856	-19.3177	-19.6145	-17.9446	-20.8374
411.5	-10.3567	-14.0301	-19.4346	-19.4825	-18.0936	-21.1506
412.5	-10.3051	-13.7981	-19.6194	-19.5432	-17.8152	-21.051
413.5	-10.0689	-13.8168	-19.5477	-19.5712	-18.2285	-21.2549
414.5	-10.5336	-13.9542	-19.8477	-19.655	-18.4115	-21.417
415.5	-10.2422	-13.7845	-19.6601	-19.5457	-18.0109	-21.3679
416.5	-10.0797	-13.6149	-19.3642	-19.3517	-17.9004	-20.9549
417.5	-10.1197	-13.5481	-19.4769	-19.5797	-17.7038	-20.7962
418.5	-9.87074	-13.7059	-19.3831	-19.421	-17.8037	-20.7661
419.5	-9.91003	-13.7716	-19.1833	-19.5893	-18.1715	-20.9452
420.5	-9.94292	-13.4593	-19.0176	-19.3913	-17.9067	-20.7353
421.5	-9.58083	-13.5207	-19.0513	-18.9452	-17.4896	-20.6645
422.5	-9.68237	-13.5836	-19.0747	-18.9528	-17.7737	-20.7583
423.5	-9.79739	-13.5023	-19.4419	-19.3377	-18.1815	-20.7684
424.5	-9.63832	-13.6005	-19.164	-19.2879	-17.9263	-20.4191
425.5	-9.93317	-13.6021	-19.1317	-19.4926	-17.7535	-20.5976
426.5	-9.66145	-13.3755	-19.0279	-19.2827	-17.69	-20.4828
427.5	-9.53511	-13.7372	-19.1205	-19.2821	-17.9141	-20.5981
428.5	-10.0886	-13.8026	-19.6266	-19.6404	-17.9605	-20.8023
429.5	-10.0348	-13.7057	-19.555	-19.8376	-17.9266	-20.4642
430.5	-9.67729	-13.3752	-19.3414	-19.323	-17.7395	-20.4759
431.5	-9.51746	-13.366	-19.4591	-19.3963	-17.7765	-20.9209
432.5	-9.63959	-13.2613	-19.3676	-19.4325	-17.9765	-21.2552
433.5	-10.2624	-13.7583	-19.6721	-19.7336	-18.2766	-21.5784
434.5	-10.0316	-13.6756	-19.4866	-19.5624	-18.4777	-21.1103
435.5	-9.72809	-13.4418	-19.0681	-19.4796	-18.1837	-20.7535
436.5	-10.0472	-13.3499	-19.0401	-19.628	-18.2813	-20.8929
437.5	-9.87598	-13.1228	-18.9568	-19.4699	-18.2006	-20.4321
438.5	-9.79628	-13.1827	-19.0133	-19.2857	-18.0742	-20.4499
439.5	-9.8927	-13.5252	-19.1244	-19.6883	-18.2972	-20.5873
440.5	-9.70988	-13.5763	-19.227	-19.4569	-18.0761	-20.7649
441.5	-9.64934	-13.1526	-19.0737	-19.3739	-18.034	-20.592
442.5	-9.3623	-12.9793	-19.2553	-19.2784	-17.6144	-20.3423
443.5	-9.36403	-13.0687	-19.4275	-19.2959	-17.726	-19.9838
444.5	-9.43263	-13.2393	-19.4918	-19.265	-18.2431	-20.2705
445.5	-9.60542	-13.604	-19.7389	-19.4163	-18.3315	-20.4574
446.5	-9.87637	-13.9791	-19.7133	-19.4775	-18.4135	-20.3772
447.5	-9.95871	-13.6488	-19.5612	-19.6293	-18.4842	-20.2938
448.5	-9.83801	-13.8474	-19.517	-19.7816	-18.4528	-20.5249
449.5	-9.7923	-13.9391	-19.6794	-19.7391	-18.4709	-20.5541
450.5	-9.71364	-13.8935	-19.2662	-19.432	-18.3016	-20.4946
451.5	-9.75003	-13.7686	-19.4515	-19.5999	-18.314	-20.3059
452.5	-9.7888	-13.9781	-19.6284	-19.7366	-18.1724	-20.2924
453.5	-9.74847	-13.8298	-19.4819	-19.7572	-18.2374	-20.3829
454.5	-9.49098	-14.0112	-19.4055	-19.9167	-18.1866	-20.5006
455.5	-9.47551	-14.0759	-19.2891	-19.5652	-18.097	-20.4919
456.5	-9.6395	-14.0716	-19.0641	-19.6356	-17.8103	-20.5347
457.5	-9.93613	-14.2184	-19.498	-19.9372	-18.2644	-20.7546
458.5	-9.63544	-13.8187	-19.352	-20.0389	-18.4606	-20.9178
459.5	-9.77301	-13.6976	-19.6191	-19.918	-18.4663	-20.5737
460.5	-9.44604	-13.297	-19.1317	-19.7285	-17.7898	-20.222
461.5	-9.66982	-13.5273	-19.3624	-19.7203	-17.6989	-20.3551
462.5	-9.82878	-13.6742	-19.5366	-19.6184	-17.7927	-20.4751
463.5	-9.54988	-13.3811	-19.6273	-19.4483	-17.6329	-20.8086
464.5	-9.49722	-13.6463	-19.4282	-19.7303	-17.6966	-20.8007
465.5	-9.45137	-13.4615	-19.3037	-19.6717	-17.5999	-20.8554
466.5	-9.49629	-13.2889	-19.289	-19.5019	-17.4914	-20.7365
467.5	-9.64629	-13.1255	-19.5172	-19.5231	-17.594	-20.6335
468.5	-9.71394	-13.6288	-19.9708	-20.0086	-17.987	-20.8747
469.5	-9.69955	-13.5379	-19.6051	-19.607	-17.6862	-20.8356
470.5	-9.85411	-13.6079	-19.5232	-19.3789	-17.7632	-20.5481
471.5	-9.88058	-13.7588	-19.9897	-19.6959	-18.1721	-20.8906
472.5	-9.60504	-13.5791	-20.011	-19.5464	-18.2028	-20.9282
473.5	-9.84425	-13.8125	-20.3143	-19.7035	-18.2397	-21.0049
474.5	-9.78122	-13.5049	-19.8612	-19.5689	-17.8054	-20.8365
475.5	-9.88879	-13.6639	-20.0611	-19.8294	-18.067	-20.7601
476.5	-9.75191	-13.8105	-19.9508	-20.0789	-18.0051	-20.8354
477.5	-9.8701	-13.7625	-19.8328	-19.82	-17.8911	-20.97
478.5	-10.1593	-13.9998	-20.1151	-19.8244	-18.1508	-21.3284
479.5	-10.3421	-14.0275	-20.2604	-19.7362	-18.0944	-21.2778
480.5	-10.3072	-13.8858	-20.1102	-19.6043	-17.8746	-21.216
481.5	-10.1344	-13.8927	-19.8248	-19.5259	-17.8287	-21.1111
482.5	-9.80894	-13.3066	-19.4381	-19.171	-17.4341	-20.6551
483.5	-9.933	-13.2942	-19.7862	-19.4671	-17.8373	-20.7757
484.5	-9.80035	-13.2474	-19.8992	-19.6146	-17.7239	-20.8023
485.5	-9.74706	-13.3405	-19.7528	-19.4342	-17.7635	-20.8959
486.5	-10.0138	-13.5106	-19.8376	-19.3848	-17.8501	-21.1139
487.5	-9.72627	-13.376	-19.6143	-19.2289	-17.9414	-21.0879
488.5	-10.0669	-12.4315	-19.6619	-19.411	-17.2582	-20.7074
489.5	-10.0482	-13.3916	-20.0912	-19.693	-18.152	-21.4582
490.5	-10.2962	-13.7827	-20.2084	-19.8395	-18.3531	-21.8555
491.5	-10.1661	-13.6733	-20.0307	-19.9578	-18.2395	-21.6164
492.5	-10.1185	-13.4045	-19.7862	-19.5785	-18.1012	-21.4258
493.5	-10.197	-13.5155	-19.8623	-20.1403	-18.4078	-21.7418
494.5	-10.1892	-13.492	-19.9045	-20.052	-18.2039	-21.7856
495.5	-10.2466	-13.2967	-19.5768	-19.8082	-18.075	-21.7145
496.5	-10.1236	-13.3795	-19.5307	-19.3809	-17.8797	-21.3008
497.5	-10.2599	-13.8963	-19.6725	-19.5575	-18.1356	-21.7981
498.5	-10.4829	-14.0307	-20.1022	-19.9129	-18.8274	-21.8727
499.5	-10.3075	-13.669	-20.0576	-19.7801	-18.7106	-21.7192
500.5	-10.4954	-13.7932	-20.2287	-19.9485	-18.6274	-21.8133
501.5	-10.2197	-13.6866	-19.9975	-19.7567	-18.3656	-21.6008
502.5	-10.2786	-13.6221	-20.0791	-19.6535	-18.3945	-21.7676
503.5	-10.4611	-14.0678	-20.3815	-19.8703	-18.277	-21.8551
504.5	-10.4345	-14.312	-20.535	-20.0895	-18.3793	-21.8778
505.5	-10.6005	-14.2338	-20.3947	-20.1699	-18.582	-21.8351
506.5	-10.6626	-14.1713	-20.5022	-20.2613	-18.4168	-21.7305
507.5	-10.5587	-14.3096	-20.7295	-20.2481	-18.1605	-21.6453
508.5	-10.3685	-14.169	-20.4658	-20.3387	-18.1242	-21.5621
509.5	-10.079	-13.9167	-19.7768	-19.8422	-18.0891	-21.3973
510.5	-10.4013	-14.3076	-19.8815	-19.9703	-18.2426	-21.6434
511.5	-10.5009	-14.0518	-20.1256	-19.9961	-18.4418	-21.8219
512.5	-10.3267	-14.21	-20.1905	-19.8864	-18.7328	-21.8039
513.5	-10.77	-14.2713	-20.3389	-20.0121	-18.5492	-21.8727
514.5	-10.6251	-14.2924	-20.0412	-19.525	-18.3766	-21.7664
515.5	-10.2396	-14.0038	-19.8596	-19.8645	-17.9738	-21.5246
516.5	-9.92278	-14.1788	-19.5897	-19.8621	-17.7613	-21.4774
517.5	-10.029	-14.3811	-19.8033	-19.8813	-17.8063	-21.4684
518.5	-10.0849	-14.0147	-19.6279	-19.7067	-17.6399	-20.9262
519.5	-10.0665	-14.1842	-19.5834	-19.5465	-17.8496	-21.0691
520.5	-10.0118	-14.0948	-19.7979	-19.6922	-18.036	-21.1356
521.5	-10.0603	-13.7577	-19.5678	-19.7688	-17.9293	-21.0172
522.5	-10.0986	-13.983	-19.8686	-19.5121	-18.1578	-21.0422
523.5	-10.0302	-13.6081	-19.8807	-19.4977	-18.0426	-20.9934
524.5	-9.71146	-13.5424	-19.7846	-19.2469	-17.8051	-20.7559
525.5	-9.86613	-13.7827	-19.8662	-19.436	-17.5293	-21.0574
526.5	-9.90715	-13.6885	-19.8951	-19.7555	-17.8578	-21.2305
527.5	-9.89661	-13.6022	-20.0889	-19.3981	-17.7594	-20.8793
528.5	-9.97395	-13.7022	-19.7737	-19.2696	-17.9699	-21.0895
529.5	-9.64738	-13.6143	-19.4045	-19.2989	-17.7625	-20.9012
530.5	-9.68214	-13.8963	-19.9475	-19.9446	-18.0223	-21.2856
531.5	-9.4958	-13.5545	-19.8096	-19.4867	-18.0211	-21.366
532.5	-9.42786	-13.1905	-19.7811	-19.1844	-17.3707	-21.1043
533.5	-9.5255	-13.0994	-19.367	-19.1317	-17.1531	-20.5332
534.5	-9.30206	-13.1616	-19.3654	-18.7422	-17.1457	-20.3606
535.5	-9.7345	-13.2916	-19.6428	-18.9067	-17.4207	-20.8746
536.5	-9.60324	-13.3424	-19.5397	-19.0356	-17.4606	-20.9613
537.5	-9.47473	-13.487	-19.467	-19.1426	-17.6254	-20.9477
538.5	-9.74466	-13.6198	-19.7944	-19.3516	-17.5137	-21.0231
539.5	-9.88527	-13.487	-19.6666	-19.3391	-17.5336	-20.8719
540.5	-9.90988	-13.5608	-19.6725	-19.3922	-17.7774	-21.093
541.5	-9.82161	-13.7249	-19.3826	-19.5247	-17.7949	-21.166
542.5	-9.68019	-13.2194	-19.1385	-19.2453	-17.7899	-20.8879
543.5	-9.71848	-13.3538	-19.4069	-19.661	-18.1609	-21.0586
544.5	-9.90364	-13.5084	-19.3768	-19.7106	-17.9543	-21.1941
545.5	-9.46654	-13.2202	-19.3373	-19.2239	-17.9309	-20.8227
546.5	-9.60637	-13.4858	-19.5791	-19.2383	-18.2688	-20.9738
547.5	-9.25793	-13.4323	-19.3291	-19.3008	-18.0477	-21.0652
548.5	-9.71457	-13.5752	-19.6459	-19.5426	-17.9809	-21.3192
549.5	-9.77512	-13.3874	-19.7967	-19.7125	-18.2258	-21.4453
550.5	-9.42239	-13.4952	-19.5526	-19.8641	-17.9231	-21.1402
551.5	-9.85052	-13.862	-19.7787	-20.0059	-18.2082	-21.4703
552.5	-9.89893	-13.7209	-19.6385	-20.0235	-18.241	-21.5344
553.5	-9.83568	-13.851	-19.6647	-19.8594	-18.0848	-21.2375
554.5	-9.91066	-13.9393	-19.7928	-20.2375	-18.1066	-21.3938
555.5	-9.67395	-13.7506	-19.4076	-20.0102	-18.0899	-21.2563
556.5	-9.89503	-13.8194	-19.6643	-19.9911	-18.3512	-21.3965
557.5	-9.62708	-13.8147	-19.9826	-20.1754	-18.0789	-21.4207
558.5	-9.42316	-13.2221	-19.6131	-19.8477	-17.907	-21.2445
559.5	-9.70714	-13.2264	-19.867	-20.1367	-17.7258	-21.2902
560.5	-9.64818	-13.3838	-19.5709	-19.7356	-17.8504	-20.9332
561.5	-9.52199	-13.5354	-19.1162	-19.5434	-17.5219	-20.7094
562.5	-9.43997	-13.5721	-19.3901	-19.5188	-17.7071	-20.6496
563.5	-9.64192	-13.9018	-19.4783	-19.8266	-17.927	-20.859
564.5	-9.46651	-13.5237	-19.3412	-19.7688	-17.9688	-21.0117
565.5	-9.69974	-13.5682	-19.276	-19.8356	-17.9363	-20.9938
566.5	-9.97707	-13.7795	-19.2994	-19.9442	-18.2692	-21.1141
567.5	-10.0388	-13.3506	-19.1322	-20.2606	-18.1129	-21.0231
568.5	-10.0716	-13.2573	-19.2975	-20.5598	-18.4856	-21.0817
569.5	-9.75363	-13.2944	-19.0182	-20.07	-18.3723	-20.7715
570.5	-9.963	-13.3291	-19.167	-20.0352	-18.6031	-20.6738
571.5	-10.3614	-13.2088	-19.1451	-20.0793	-18.2461	-21.1871
572.5	-10.4739	-13.6264	-19.3729	-20.3246	-18.6379	-21.1621
573.5	-10.5896	-13.7069	-19.6002	-20.4668	-18.7387	-21.018
574.5	-10.4196	-13.5143	-19.5932	-20.2801	-18.7867	-21.225
575.5	-10.2415	-13.5272	-19.5209	-20.2492	-18.6699	-21.0602
576.5	-10.17	-13.5202	-19.6362	-20.0516	-18.5477	-20.8973
577.5	-9.93762	-13.0487	-19.1928	-19.5614	-18.0985	-20.5817
578.5	-9.98801	-13.1616	-19.2901	-19.5961	-18.0766	-20.807
579.5	-10.4341	-13.6471	-19.8084	-19.8981	-18.3512	-21.1555
580.5	-10.4622	-13.7674	-19.4611	-19.9172	-18.4668	-20.9383
581.5	-10.1466	-13.8303	-19.3815	-19.7344	-18.2879	-20.8066
582.5	-10.3689	-13.8459	-19.5432	-19.8071	-18.1324	-20.6188
583.5	-10.6181	-13.4592	-19.5158	-19.8352	-18.1031	-20.5965
584.5	-10.6841	-13.2452	-19.2412	-19.825	-18.1719	-20.9067
585.5	-10.5368	-13.6104	-19.5334	-19.8817	-18.325	-21.032
586.5	-10.4665	-13.7506	-19.5623	-20.0266	-18.45	-20.9356
587.5	-10.6767	-13.7506	-19.7897	-20.0043	-18.4148	-21.3188
588.5	-10.4431	-13.5334	-19.5678	-19.7485	-18.1731	-20.8774
589.5	-10.5755	-13.3416	-19.7213	-19.72	-18.4184	-21.1992
590.5	-10.2583	-13.2776	-19.7799	-19.5762	-18.3828	-20.9797
591.5	-10.0314	-13.292	-19.3553	-19.3828	-17.7258	-21.0031
592.5	-9.9259	-13.1639	-19.2877	-19.1016	-17.9207	-20.6465
593.5	-9.91106	-13.1577	-19.0194	-19.1926	-17.8152	-20.5641
594.5	-9.96066	-13.8213	-19.4389	-19.3801	-17.9016	-20.9375
595.5	-10.5884	-14.2249	-19.6533	-20.0485	-18.0902	-21.3738
596.5	-10.1954	-13.7334	-19.5397	-19.445	-17.7934	-20.9293
597.5	-9.68527	-13.5022	-19.3983	-19.4692	-17.5781	-20.6098
598.5	-9.84933	-13.7108	-19.5553	-19.6907	-17.5442	-20.7063
599.5	-10.0103	-13.5381	-19.6084	-19.4926	-17.6555	-20.4274
600.5	-9.83606	-13.3948	-19.5928	-19.577	-17.5266	-20.2492
601.5	-9.66887	-12.987	-19.0975	-19.2176	-17.1801	-20.1946
602.5	-9.93488	-13.0741	-19.3983	-19.1621	-17.2566	-19.9746
603.5	-10.1868	-13.5432	-19.5334	-19.6332	-17.5258	-20.4145
604.5	-10.022	-13.4815	-19.4174	-19.3012	-17.5215	-20.2668
605.5	-8.94426	-13.4284	-19.3948	-18.1778	-17.4723	-19.6402
606.5	-13.1173	-13.446	-20.0252	-24.418	-17.5055	-24.0594
607.5	-10.5775	-14.8916	-17.1803	-19.7532	-18.4586	-20.4883
608.5	-8.10481	-14.2428	-20.5252	-17.4461	-17.9215	-18.2094
609.5	-8.43332	-13.5932	-20.6409	-18.1137	-17.5551	-19.3524
610.5	-8.65207	-13.1537	-19.9623	-18.6821	-17.5606	-20.1766
611.5	-9.20715	-13.2959	-19.669	-19.4289	-18.0238	-21.0992
612.5	-9.27121	-13.4483	-19.8143	-19.8047	-18.0109	-21.6
613.5	-9.49347	-13.2436	-19.5529	-19.9055	-18.4922	-21.5824
614.5	-8.49425	-12.7592	-19.1119	-19.0906	-18.3281	-21.0531
615.5	-8.4548	-12.1459	-20.0049	-18.6332	-18.9684	-20.2609
616.5	-8.91417	-11.651	-19.3717	-17.45	-18.034	-19.4016
617.5	-9.84856	-12.3803	-18.5639	-16.3633	-17.6422	-19.8059
618.5	-10.306	-13.1213	-18.4252	-15.9024	-17.5313	-19.3574
619.5	-10.5567	-13.3233	-18.8334	-16.1125	-17.5485	-19.5793
620.5	-10.5157	-13.1557	-18.758	-16.1606	-17.4887	-19.768
621.5	-10.1958	-13.0436	-18.4346	-16.5051	-17.7856	-20.3457
622.5	-10.1818	-13.06	-18.4522	-16.7012	-18.3184	-20.8211
623.5	-9.92395	-12.8135	-18.3998	-16.4442	-18.5516	-20.8364
624.5	-9.70168	-12.61	-18.3729	-16.5281	-18.7734	-20.9102
625.5	-9.63136	-12.6854	-18.3018	-16.1485	-18.3785	-20.6188
626.5	-9.8466	-12.9764	-18.7315	-16.3129	-18.4258	-20.4961
627.5	-9.70636	-12.9366	-18.4823	-16.2942	-18.3613	-20.4207
628.5	-9.56105	-12.7873	-18.6639	-16.3403	-18.2734	-20.468
629.5	-9.83762	-13.242	-18.6873	-16.7785	-18.6164	-20.9785
630.5	-9.76183	-12.9432	-18.7151	-16.7114	-18.4281	-20.5328
631.5	-9.43529	-12.5092	-18.5209	-16.2832	-18.059	-20.2246
632.5	-9.11966	-12.2643	-18.1022	-15.8938	-17.8547	-19.9336
633.5	-9.25519	-12.7327	-18.1377	-16.2727	-17.9481	-20.1949
634.5	-8.89697	-12.3307	-18.1154	-15.6055	-17.7555	-19.9746
635.5	-9.26262	-12.5803	-18.2131	-16.1309	-17.7649	-19.9758
636.5	-9.05676	-12.4639	-17.9768	-16.1758	-17.8754	-20.1578
637.5	-9.52629	-12.858	-18.5991	-16.3336	-18.2254	-20.6004
638.5	-9.32903	-12.9303	-18.3596	-16.4469	-18.1973	-20.4176
639.5	-9.22864	-12.8291	-18.4963	-15.9899	-18.1543	-20.6027
640.5	-9.45987	-12.7588	-18.3697	-15.8551	-18.0426	-20.5953
641.5	-8.83411	-12.2725	-18.1264	-15.6352	-17.7973	-20.3961
642.5	-8.78839	-12.2264	-18.1576	-15.7071	-17.8969	-20.2281
643.5	-8.64934	-11.9936	-18.2045	-15.7879	-17.8332	-20.391
644.5	-8.70714	-12.3248	-18.2658	-15.7446	-18.0742	-20.2512
645.5	-8.49231	-11.8768	-17.9479	-15.8207	-17.5293	-19.9274
646.5	-8.85167	-12.4323	-18.2877	-15.7071	-17.434	-20.2711
647.5	-9.35559	-12.1991	-18.1049	-15.6258	-17.6453	-19.9809
648.5	-9.51768	-12.4037	-18.3772	-15.6313	-17.5508	-20.1719
649.5	-9.19504	-12.385	-18.3674	-15.7203	-17.9024	-20.0363
650.5	-9.14192	-12.3526	-18.5577	-15.4543	-17.7836	-20.4465
651.5	-8.90169	-12.3725	-18.5666	-15.6204	-17.4153	-20.2215
652.5	-9.08566	-12.337	-18.5229	-15.5864	-17.7121	-20.1367
653.5	-9.24466	-12.4541	-18.5108	-15.9227	-17.7719	-20.2414
654.5	-9.16223	-12.2264	-18.5701	-15.9774	-17.9282	-19.9399
655.5	-9.097	-12.0131	-18.36	-15.5442	-17.7008	-19.6817
656.5	-8.75363	-12.1764	-18.3467	-15.261	-17.2266	-19.6559
657.5	-8.65324	-12.5932	-18.4678	-15.6735	-17.7117	-19.9117
658.5	-8.76808	-12.4397	-18.5576	-15.7574	-17.4773	-20.0863
659.5	-8.9837	-12.5647	-18.6862	-15.8606	-17.8984	-20.1957
660.5	-9.06535	-12.7393	-18.542	-15.9325	-17.9457	-20.6199
661.5	-9.10834	-12.7249	-18.5955	-15.9176	-17.6875	-20.1766
662.5	-9.10677	-12.742	-18.3944	-16.1301	-17.9027	-20.3953
663.5	-8.69229	-12.6768	-18.474	-15.8246	-17.75	-20.2629
664.5	-8.8255	-12.6467	-18.6811	-15.9469	-17.9617	-20.2891
665.5	-8.80403	-12.5647	-18.5991	-15.8407	-17.6914	-20.2152
666.5	-8.60753	-12.6948	-18.5389	-15.7258	-17.8449	-20.3297
667.5	-8.50285	-12.4502	-18.6096	-15.716	-17.6156	-20.2145
668.5	-8.13684	-12.7651	-18.2115	-15.2586	-17.5922	-19.7469
669.5	-8.76067	-12.6616	-18.4033	-15.7075	-17.857	-20.0414
670.5	-9.0798	-12.7651	-18.3358	-15.9871	-17.9836	-20.5988
671.5	-9.2634	-12.6159	-18.3983	-15.9422	-17.8281	-20.5016
672.5	-8.94231	-12.2455	-18.4088	-15.8114	-17.7707	-20.4348
673.5	-9.16301	-12.4389	-18.7252	-15.9606	-18.0477	-20.2277
674.5	-8.85402	-12.2217	-18.2908	-15.5704	-17.9844	-20.241
675.5	-9.23372	-12.6338	-18.81	-15.7739	-18.111	-20.2844
676.5	-9.19153	-12.7295	-18.6241	-15.8996	-17.7129	-20.3746
677.5	-8.96301	-12.619	-18.5389	-15.9715	-17.7875	-20.341
678.5	-8.93176	-12.5389	-18.7428	-16.0993	-17.9383	-20.4625
679.5	-9.39894	-12.9221	-18.9377	-16.4535	-18.0317	-20.4957
680.5	-8.82628	-12.7397	-18.6041	-16.236	-17.5152	-20.3684
681.5	-8.44193	-12.4608	-18.0741	-15.7938	-16.982	-19.882
682.5	-8.14386	-12.1866	-17.9912	-15.5735	-17.1559	-19.8691
683.5	-8.2384	-12.5448	-18.0162	-15.643	-17.1156	-19.6524
684.5	-8.42004	-12.3639	-18.3479	-15.6871	-17.609	-19.7246
685.5	-8.65129	-12.337	-18.3791	-15.8297	-17.6684	-19.9891
686.5	-8.70558	-12.2854	-18.0948	-15.7836	-17.3664	-19.7496
687.5	-8.71809	-12.1456	-18.2002	-16.1633	-17.5395	-20.2531
688.5	-8.84503	-12.2878	-18.2748	-16.5657	-17.675	-20.4645
689.5	-8.63879	-12.2815	-18.3752	-16.2051	-17.4883	-20.1621
690.5	-8.5009	-12.0178	-18.1655	-16.1184	-17.1375	-19.9047
691.5	-9.03566	-12.2651	-18.2694	-16.2688	-17.6918	-20.6988
692.5	-9.01497	-12.3307	-18.1717	-16.361	-17.4055	-20.6063
693.5	-9.03799	-12.5702	-18.2682	-16.4114	-17.5504	-20.5992
694.5	-8.52199	-12.2842	-18.5221	-16.3661	-17.5684	-20.5754
695.5	-8.88527	-12.0702	-18.5073	-16.1262	-17.3699	-20.4945
696.5	-8.99153	-12.3604	-18.2713	-16.1914	-17.5321	-20.4984
697.5	-9.15285	-12.0393	-18.0244	-15.9567	-17.4629	-20.3371
698.5	-8.61378	-12.2456	-18.1615	-15.9996	-17.2106	-20.2414
699.5	-8.90285	-12.3284	-18.3549	-15.9286	-17.4684	-20.1633
700.5	-8.83487	-12.1596	-18.7158	-16.0196	-17.5824	-20.0875
701.5	-8.56223	-12.4846	-18.1975	-15.6551	-17.2305	-19.9285
702.5	-8.5755	-12.2108	-18.2068	-15.7043	-17.2871	-19.9914
703.5	-8.85207	-12.5604	-18.4514	-15.9516	-17.6777	-20.2457
704.5	-8.5462	-12.0104	-18.3596	-15.7543	-17.6852	-19.9739
705.5	-8.64503	-12.024	-18.269	-15.8746	-17.5938	-20.1
706.5	-8.85793	-12.7627	-18.5635	-15.8922	-17.7367	-20.6289
707.5	-8.24857	-12.3413	-18.0979	-15.5262	-17.3321	-20.0004
708.5	-8.28839	-12.2889	-18.1084	-15.6895	-17.6867	-20.3945
709.5	-8.56145	-12.2217	-18.1166	-15.9344	-17.4922	-20.2774
710.5	-8.47511	-12.0944	-17.9529	-15.711	-17.291	-20.2859
711.5	-8.63525	-12.2135	-18.3162	-16.0387	-17.8691	-20.6984
712.5	-8.45676	-12.1772	-18.442	-15.811	-17.5731	-20.5406
713.5	-8.59152	-12.6537	-18.4018	-15.7906	-17.7293	-20.5723
714.5	-8.41887	-12.0596	-18.1264	-15.6031	-17.4813	-20.2129
715.5	-8.49387	-12.0608	-17.9748	-15.661	-17.2653	-20.2719
716.5	-8.85168	-12.4745	-18.4166	-15.8692	-17.5008	-20.327
717.5	-8.5544	-12.3725	-18.2178	-16.0754	-17.4758	-20.2652
718.5	-8.51106	-12.4901	-18.6323	-16.3036	-17.6668	-20.0223
719.5	-8.15207	-11.9393	-17.9471	-15.5461	-17.1098	-19.868
720.5	-7.9841	-11.4596	-17.6873	-15.1973	-16.6543	-19.3687
721.5	-8.12511	-11.9682	-18.1549	-15.5535	-16.866	-19.8781
722.5	-8.39348	-11.9948	-18.0502	-15.7129	-17.2293	-19.9035
723.5	-8.33331	-12.0123	-17.6838	-15.7063	-17.418	-19.5797
724.5	-8.34776	-11.9854	-18.1627	-15.7848	-17.5473	-19.8262
725.5	-8.22356	-11.7542	-18.1412	-15.909	-17.0602	-19.8074
726.5	-8.31143	-11.6295	-17.849	-15.6367	-16.9156	-19.8828
727.5	-8.52864	-11.7362	-18.033	-15.8649	-17	-19.7828
728.5	-8.44231	-11.687	-17.6971	-15.6188	-17.0485	-19.8035
729.5	-8.39232	-11.6671	-17.583	-15.3942	-17.1129	-19.8086
730.5	-8.2052	-11.3483	-17.7846	-15.4153	-17.2578	-19.7383
731.5	-8.26926	-11.1178	-17.7705	-15.2364	-17.1434	-19.5403
732.5	-8.57004	-11.1928	-18.1354	-15.284	-17.2391	-19.5742
733.5	-8.40247	-11.4694	-17.9045	-15.5711	-17.4793	-19.7633
734.5	-8.5591	-11.5998	-18.0268	-15.8289	-17.4699	-19.9215
735.5	-8.39308	-11.4186	-17.7104	-15.4531	-16.9793	-19.5938
736.5	-8.20558	-11.5209	-17.5545	-15.3235	-16.7777	-19.8117
737.5	-8.18332	-11.5604	-17.9811	-15.5164	-17.0274	-19.8078
738.5	-8.472	-11.935	-17.9787	-15.7953	-17.3723	-20.0688
739.5	-8.56886	-12.0569	-18.0412	-15.7399	-17.5547	-20.0391
740.5	-8.40442	-12.1502	-18.2432	-15.6989	-17.4922	-20.093
741.5	-8.44661	-12.3178	-18.4795	-15.9129	-17.7235	-20.3145
742.5	-8.3306	-12.3647	-18.2991	-15.8641	-17.5758	-20.1281
743.5	-8.26495	-11.86	-17.7201	-15.4289	-17.1691	-19.6289
744.5	-7.65793	-11.5534	-17.3905	-15.0551	-16.7137	-19.4965
745.5	-7.92276	-11.6389	-17.7545	-15.3078	-17.009	-19.7301
746.5	-8.04543	-11.5112	-17.4541	-15.2067	-17.0004	-19.7188
747.5	-8.1255	-11.5069	-17.7119	-15.5688	-16.8746	-19.8574
748.5	-8.03879	-11.4209	-17.4252	-15.3696	-16.902	-19.7719
749.5	-8.13489	-11.7315	-17.8658	-15.3055	-17.0074	-20.0469
750.5	-7.98605	-11.9334	-17.7139	-15.252	-17.2125	-20.0398
751.5	-8.08411	-12.1991	-18.0869	-15.8512	-17.0414	-19.9953
752.5	-8.05365	-11.812	-17.9233	-15.5032	-17.0422	-19.8985
753.5	-8.39894	-11.694	-18.0545	-15.6938	-17.1606	-20.1762
754.5	-8.37122	-11.6924	-18.1912	-15.5942	-17.1758	-19.8649
755.5	-8.33098	-11.5631	-17.9924	-15.3395	-17.0332	-19.8828
756.5	-8.04347	-11.3678	-18.033	-15.1305	-16.9262	-19.8039
757.5	-8.36223	-11.7768	-18.0948	-15.3492	-16.9117	-19.7801
758.5	-7.9509	-11.7194	-18.1416	-15.3297	-16.6984	-19.6465
759.5	-8.03058	-11.5799	-17.6494	-14.9363	-16.7953	-19.4922
760.5	-8.01025	-11.3838	-18.192	-15.4336	-16.832	-19.7297
761.5	-8.36887	-11.9436	-18.3783	-15.5356	-17.1594	-19.9012
762.5	-8.74387	-11.6104	-18.2569	-15.7071	-16.7934	-19.7852
763.5	-8.65636	-11.4377	-18.1698	-15.5895	-16.8449	-19.5215
764.5	-8.14816	-10.9432	-17.6932	-15.0496	-16.5262	-18.991
765.5	-8.03448	-11.2334	-17.7268	-15.1742	-16.8094	-19.4609
766.5	-8.07356	-11.1854	-17.5428	-15.2367	-16.7004	-19.4543
767.5	-7.68605	-10.9131	-17.6744	-15.1391	-16.6906	-19.1731
768.5	-8.03215	-11.5694	-18.0287	-15.2453	-16.9789	-19.3539
769.5	-8.29698	-11.708	-18.1342	-15.2571	-17.2867	-19.3117
770.5	-8.13136	-11.1885	-17.7483	-15.0817	-17.0215	-19.2149
771.5	-8.37357	-11.5069	-17.8502	-15.1551	-17.0477	-19.284
772.5	-8.49699	-11.9295	-18.2729	-15.2371	-17.4809	-19.684
773.5	-8.57941	-12.2413	-17.9612	-15.4758	-17.2102	-19.4125
774.5	-8.3134	-12.0065	-17.878	-15.3477	-17.1531	-19.4582
775.5	-8.32668	-12.4131	-18.3088	-15.5348	-17.3231	-19.7285
776.5	-8.35011	-12.3303	-17.8408	-15.5336	-17.3559	-19.5645
777.5	-8.0919	-11.919	-17.7865	-15.4348	-17.252	-19.5422
778.5	-8.19739	-11.9077	-18.042	-15.6571	-17.2609	-19.5656
779.5	-8.20988	-11.8057	-17.6557	-15.5309	-17.2754	-19.4672
780.5	-8.22746	-12.1268	-17.9717	-15.5	-17.4785	-19.4285
781.5	-8.4673	-12.1772	-17.9447	-15.436	-17.1734	-19.2336
782.5	-8.02238	-11.8444	-17.5791	-14.993	-16.8778	-18.9317
783.5	-7.8927	-11.7069	-17.4994	-15.2078	-16.8	-18.7012
784.5	-7.86964	-11.9268	-17.2295	-14.6422	-16.3852	-18.7328
785.5	-7.80363	-11.794	-17.5127	-14.8243	-16.3773	-18.6563
786.5	-7.84348	-11.9471	-17.4577	-15.0403	-16.2942	-18.8028
787.5	-8.04269	-11.9768	-18.135	-15.3836	-16.8055	-18.9121
788.5	-7.6833	-11.8315	-17.6237	-15.1739	-16.7824	-18.8656
789.5	-7.71574	-11.826	-17.5694	-15.2602	-16.4555	-18.9399
790.5	-7.76302	-11.794	-17.6866	-14.7575	-16.5109	-18.7895
791.5	-8.24269	-11.9698	-17.9666	-15.1567	-16.8754	-19.0985
792.5	-7.98293	-11.8557	-17.4791	-15.225	-16.4637	-19.0457
793.5	-7.85011	-11.5795	-17.1791	-14.6852	-16.1863	-18.8883
794.5	-7.78879	-11.5721	-17.5834	-14.8344	-16.3363	-19.2559
795.5	-8.1427	-12.1166	-17.8397	-15.3317	-17.0262	-19.3863
796.5
797.5

## Sheet: 3E
C0501-G12D10mer	Response units
Time (s)	1.25	2.5	5.0	10	20	40	[TCR10] mM
1.5	-0.10307	0.449707	0.115372	0.37207	0.069504	0.382767
2.5	0.314651	0.430405	0.076538	0.532074	0.18895	0.783005
3.5	-0.03496	0.35289	0.032547	0.36026	-0.06245	0.510101
4.5	0.195984	0.354218	0.308167	0.62558	0.028015	0.506195
5.5	-0.37871	0.443604	0.145676	0.162842	0.248795	0.273468
6.5	0.021072	0.490494	0.214752	0.682938	0.246246	0.438782
7.5	-0.05511	0.060318	0.059586	0.228943	0.126068	0.333542
8.5	0.08255	0.187363	0.271545	0.341522	-0.17923	0.408005
9.5	-0.01878	0.154068	0.09552	0.500504	-0.03214	0.261902
10.5	-0.09158	0.381729	0.028183	0.490433	0.178574	0.28511
11.5	-0.28676	0.132584	0.246841	0.694092	0.208252	0.382446
12.5	-0.30277	-0.04413	-0.0072	0.35051	-0.13908	0.169022
13.5	-0.30104	0.166275	-0.11385	0.440674	0.069367	0.262222
14.5	0.095657	0.111404	0.248413	0.460892	0.01059	0.309631
15.5	-0.46254	-0.2478	-0.34293	0.057068	-0.43393	-0.09045
16.5	-0.30425	0.097427	-0.10378	0.348785	-0.22963	0.128159
17.5	-0.33354	0.213516	0.014435	0.660965	-0.03378	0.377762
18.5	-0.16081	0.252121	0.02684	0.530029	-0.05019	0.548859
19.5	-0.25659	0.13649	0.277954	0.62114	-0.33479	0.239487
20.5	-0.02525	0.449783	0.212555	0.579727	0.118347	0.391739
21.5	-0.37824	0.353134	0.014343	0.533325	0.120911	0.523071
22.5	-0.35307	0.21814	0.271866	0.448471	-0.10666	0.381668
23.5	-0.27121	-0.00719	0.402237	0.410126	-0.05986	0.276749
24.5	-0.35112	-0.17709	0.161087	0.155365	-0.30266	-0.08348
25.5	-0.3219	-0.01147	0.334824	0.14801	-0.3001	-0.30356
26.5	-0.33051	0.083908	0.489731	0.235886	-0.18808	-0.32803
27.5	-0.1716	-0.03172	0.326218	0.073776	-0.24127	-0.2217
28.5	0.239182	0.431564	0.363098	0.217316	0.041382	0.211823
29.5	0.293655	0.36908	0.457245	0.346298	0.035309	0.258865
30.5	-0.23613	0.208923	0.200531	-0.15558	0.057327	0.094635
31.5	-0.28932	-0.15123	-0.03447	-0.44098	-0.24306	-0.10544
32.5	-0.30087	-0.1153	-0.26807	-0.19292	-0.14079	-0.26294
33.5	-0.13527	0.254471	-0.03557	-0.16802	0.034042	-0.0817
34.5	0.00613	0.179535	-0.0412	0.188232	0.139038	-0.05865
35.5	-0.19566	0.020172	-0.10307	0.144577	0.062882	-0.19873
36.5	0.256302	0.073685	0.074356	0.265198	0.148727	0.055496
37.5	0.316208	0.070404	-0.04135	0.053864	0.25209	0.432373
38.5	0.235901	-0.16126	-0.40355	-0.24278	-0.21027	-0.05693
39.5	0.369339	-0.09811	-0.14887	0.153473	-0.3208	0.25502
40.5	0.16864	-0.18109	-0.16362	0.035355	0.075684	0.145889
41.5	0.109894	-0.14664	-0.19479	-0.13902	0.311691	0.099167
42.5	-0.00627	-0.37639	-0.42542	-0.17792	0.408646	0.043854
43.5	-0.00761	-0.41852	-0.3859	-0.34473	0.077469	0.020645
44.5	-0.17534	-0.745	-0.56378	-0.112	-0.37096	-0.20865
45.5	-0.47636	-0.70789	-0.69644	-0.30035	-0.403	-0.23904
46.5	-0.10738	-0.07132	-0.43448	-0.08965	-0.09338	0.02417
47.5	-0.19557	-0.42897	-0.75128	-0.19333	-0.45744	-0.51233
48.5	-0.40729	-0.63179	-0.91182	-0.42073	-0.66728	-0.5027
49.5	-0.41722	-0.61594	-1.01088	-0.55457	-0.57408	-0.38928
50.5	-0.19746	-0.57875	-0.97745	-0.47536	-0.53409	-0.22388
51.5	-0.01839	-0.55475	-0.65822	-0.33621	-0.4183	-0.21974
52.5	0.226837	-0.4657	-0.32307	-0.28738	0.067719	-0.00763
53.5	0.16925	-0.33218	-0.31799	-0.61816	-0.10799	-0.08498
54.5	-0.14401	-0.11974	-0.51431	-0.70979	-0.07947	-0.08684
55.5	-0.19057	-0.08264	-0.35509	-0.5334	-0.28502	0.023544
56.5	-0.06105	-0.19359	-0.63355	-0.42896	-0.24526	-0.31397
57.5	-0.32323	-0.28772	-0.67697	-0.36534	-0.30533	-0.46263
58.5	-0.10542	-0.10866	-0.74854	-0.39426	-0.20792	-0.48459
59.5	0.432709	-0.05803	-0.26386	-0.03143	-0.20635	-0.42458
60.5	0.21817	-0.01295	-0.27808	0.13089	-0.20847	-0.13849
61.5	-0.15691	-0.36459	-0.63947	-0.48433	-0.29924	-0.56154
62.5	-0.34528	-0.61389	-0.74855	-0.90886	-0.43526	-0.54607
63.5	-0.05104	-0.51288	-1.05518	-0.67854	-0.46697	-0.64763
64.5	-0.03026	-0.23868	-0.77167	-0.08434	-0.51033	-0.71951
65.5	0.297943	-2.13264	-0.53354	0.174957	-1.26518	-0.35254
66.5	-0.0762	9.03001	-0.71072	9.75934	44.3066	29.5388
67.5	3.86348	5.00117	14.7101	23.9029	42.5399	60.6537
68.5	2.71396	7.17908	15.7809	28.5303	50.1826	69.8031
69.5	2.05724	7.58954	17.5178	30.5475	53.6212	74.7496
70.5	2.05106	8.3282	18.9111	32.4377	56.724	78.7339
71.5	2.02136	8.90257	19.9104	34.8735	58.84	81.5429
72.5	2.55441	9.47571	21.332	36.4777	60.934	84.0466
73.5	2.81786	10.1073	22.3653	37.3496	62.6603	86.0473
74.5	2.66121	10.4294	22.7165	38.1935	64.1519	87.8439
75.5	2.89059	10.9206	23.3357	39.098	65.4437	89.3629
76.5	2.64871	11.0304	23.8918	40.0011	66.3952	90.3532
77.5	3.03949	11.5978	24.5255	40.9796	67.7298	91.902
78.5	2.96567	11.6441	24.3449	41.5489	68.4803	93.0006
79.5	2.87825	11.8293	24.2572	42.2071	69.2952	93.9213
80.5	3.11488	12.2562	24.34	42.9252	69.9529	94.9775
81.5	3.3159	12.7405	24.8643	43.8491	70.8288	95.7881
82.5	3.42755	13.073	25.395	44.4542	71.2871	96.5503
83.5	3.87535	13.6684	25.7647	45.1431	72.2154	97.7278
84.5	3.89638	14.1788	26.2036	45.5829	72.918	98.7356
85.5	4.0835	14.2036	26.7833	45.8874	73.6125	99.815
86.5	4.20387	14.5909	26.785	45.5814	73.8679	100.159
87.5	3.64355	14.1318	26.6613	45.3835	74.1302	100.382
88.5	3.82529	14.4193	27.3635	45.6414	75.1486	100.573
89.5	3.90599	14.5249	27.5251	45.6179	75.4872	101.127
90.5	3.71146	14.5882	27.6106	45.993	75.4538	101.552
91.5	3.81496	14.8088	27.7163	46.58	75.6919	101.845
92.5	4.08035	15.098	27.9678	46.8407	76.2083	102.561
93.5	4.29161	15.1061	27.8869	47.1932	76.7789	102.999
94.5	4.06754	14.8659	27.8884	47.1176	76.8878	103.039
95.5	4.09723	15.0144	28.3412	47.7632	77.1639	103.603
96.5	4.21613	15.2669	28.65	47.9373	77.3799	103.812
97.5	4.43004	15.665	28.98	48.2935	77.666	104.169
98.5	4.74614	15.8898	29.0306	48.7513	77.9735	104.813
99.5	5.17035	16.3324	29.0878	48.7492	78.1115	104.993
100.5	5.17567	16.667	29.4331	49.0293	78.3499	105.415
101.5	5.38239	16.7626	29.7225	48.9213	78.2635	105.672
102.5	4.92801	16.7631	29.712	49.1151	78.4108	105.634
103.5	4.96043	16.5496	29.6667	49.4002	78.6237	105.568
104.5	5.23997	17.0157	30.4662	49.7376	79.2012	106.004
105.5	5.74263	17.407	31.0857	50.2975	79.5365	106.729
106.5	5.45575	17.3516	30.828	50.2376	79.4272	105.97
107.5	5.40669	17.4059	30.5532	50.1943	79.3595	105.245
108.5	5.46271	17.4676	30.7523	50.4735	79.4372	105.296
109.5	5.11076	17.535	30.703	50.2418	79.1433	105.134
110.5	5.27551	17.8007	30.8658	50.3564	79.5788	105.137
111.5	5.48569	17.7896	30.7004	50.4117	79.8316	105.195
112.5	5.75481	18.1172	30.248	50.5846	79.7444	105.154
113.5	6.02748	18.1126	30.5165	50.8457	80.513	105.365
114.5	6.05066	17.8207	30.3687	50.8344	80.4349	105.558
115.5	6.22185	17.9489	30.644	50.8703	80.2749	105.58
116.5	6.28996	17.9152	31.2756	51.0082	80.6083	105.562
117.5	6.54356	17.9699	31.3243	51.2097	80.676	105.718
118.5	6.18021	17.8967	31.3008	51.2664	80.7473	105.338
119.5	6.06715	18.0035	31.6766	51.2766	80.8401	105.331
120.5	5.95482	18.0424	31.4653	51.456	80.8433	105.313
121.5	5.99684	17.5791	31.3181	51.2726	80.7564	105.3
122.5	5.61372	17.755	31.1047	51.1707	80.6672	105.205
123.5	5.84872	18.019	31.3012	51.6701	80.9598	105.209
124.5	6.16223	18.0048	31.7726	51.8621	81.0912	105.145
125.5	6.14482	18.3824	30.8045	52.1147	81.3138	105.296
126.5	6.21083	18.4789	29.3763	52.1875	81.349	105.423
127.5	6.26013	18.4552	29.0835	52.2921	81.4105	105.249
128.5	5.89919	18.2952	29.1097	52.0489	81.1946	105.012
129.5	6.09474	18.3274	29.4819	52.0552	81.3597	104.817
130.5	6.35558	18.3277	29.6905	52.3853	81.4972	104.744
131.5	6.54427	18.1846	29.6089	52.1561	81.4091	104.845
132.5	6.28668	18.0099	29.6118	51.7618	80.8617	104.534
133.5	6.64209	18.1496	29.4072	51.9358	81.2922	104.656
134.5	6.82443	18.556	29.7376	52.3497	81.1585	105.406
135.5	6.84833	18.5204	29.7325	51.9288	81.1098	106.025
136.5	6.65208	18.0916	29.6965	51.7425	80.973	105.734
137.5	6.52505	17.9051	29.7742	52.0587	81.0156	106.178
138.5	6.59755	18.0316	29.694	52.1527	81.1187	106.041
139.5	6.65793	18.0614	29.6402	52.2626	81.1898	106.075
140.5	6.47942	17.6049	29.469	51.4873	80.9094	105.288
141.5	6.46614	17.6606	29.6747	52.02	81.2075	105.321
142.5	6.28075	17.4347	29.8838	51.9878	81.0669	105.47
143.5	6.47029	17.8497	29.8755	52.2229	80.3262	105.616
144.5	6.31122	17.8128	29.8965	52.1769	79.8434	105.498
145.5	6.31349	17.9045	29.8491	52.1798	79.6426	105.539
146.5	6.30756	17.6098	29.6556	52.2471	79.4217	105.367
147.5	6.31192	17.5636	29.5419	52.1183	79.3262	105.179
148.5	6.13902	17.5126	29.4815	51.7717	79.1986	105.027
149.5	6.0313	17.5652	29.4012	51.3544	78.8365	104.9
150.5	5.84044	17.4223	29.3984	51.4421	78.8236	104.779
151.5	5.99333	17.3354	29.3063	51.4553	79.0488	104.634
152.5	5.98512	17.5545	29.3791	51.366	79.1861	104.95
153.5	5.95029	17.4648	29.0196	51.139	78.8331	104.527
154.5	5.97685	17.4099	28.9212	50.9155	78.7355	104.431
155.5	5.89194	17.5392	29.1848	51.3794	78.798	104.172
156.5	5.64497	17.4065	28.9414	50.8399	78.1654	103.957
157.5	5.90176	17.4914	28.9339	50.999	78.4111	104.064
158.5	5.821	17.6426	28.9531	51.1738	78.4064	104.163
159.5	6.06535	17.634	29.0468	51.3297	78.5444	104.244
160.5	5.68552	17.3913	28.7693	51.1826	78.262	103.861
161.5	6.13779	17.5015	28.8338	51.1794	78.4487	104.082
162.5	5.6423	17.0509	28.6882	50.7867	78.3661	103.891
163.5	5.80145	17.2595	29.1104	50.8129	78.5046	104.011
164.5	6.02341	17.2584	28.8629	51.1189	78.2672	104.307
165.5	5.95232	17.2638	28.936	51.2001	78.2838	104.167
166.5	5.90224	17.4902	28.8318	51.3559	78.2139	104.44
167.5	5.48216	17.2485	28.7304	51.4718	78.4452	104.5
168.5	5.61763	17.2484	28.8267	51.4622	78.5209	104.565
169.5	5.4959	16.7949	28.826	51.2811	78.264	104.183
170.5	5.43239	16.7584	28.6094	51.0776	78.1394	104.171
171.5	5.39543	16.5029	28.4075	51.1731	78.1349	104.204
172.5	5.25029	16.5868	28.233	51.155	77.9048	104.149
173.5	5.55263	16.5676	28.3935	51.494	77.8741	104.213
174.5	5.42584	16.3776	28.0065	51.435	77.6222	103.947
175.5	5.15309	16.3093	27.9908	51.0975	77.6048	103.804
176.5	5.41559	16.7222	28.3773	51.2989	77.9737	103.987
177.5	5.23872	16.6118	28.2544	50.8901	77.6195	103.445
178.5	5.10622	16.5923	28.0786	50.7205	77.1068	103.313
179.5	5.06262	16.6244	28.0776	50.6968	77.3574	103.356
180.5	5.13373	16.5944	28.0647	50.8129	77.4193	103.417
181.5	5.34441	16.5602	28.1696	50.9261	77.0463	103.479
182.5	5.62036	16.6408	28.2365	50.8971	77.2283	103.649
183.5	5.27206	16.4783	28.2398	50.6932	77.3617	103.356
184.5	5.15935	16.5778	27.9849	50.6508	77.4034	102.866
185.5	7.66403	17.7097	39.7194	71.0908	112.686	158.232
186.5	0.034424	3.10768	4.92967	7.4845	3.70724	-16.9798
187.5	0.343567	4.09142	5.74185	11.1799	14.9551	12.3227
188.5	-0.96338	2.77362	3.00389	7.96521	9.78952	5.25589
189.5	-3.58174	0.385162	0.144424	5.15793	6.81569	2.9366
190.5	-5.25464	-1.27687	-1.80034	3.41832	5.99467	3.26003
191.5	-5.72691	-1.51248	-1.94104	3.68387	7.10068	5.27667
192.5	-5.65855	-1.32054	-1.12025	4.69363	8.5502	7.13167
193.5	-5.17065	-0.82163	-0.22673	5.7627	9.74342	8.41299
194.5	-4.44987	-0.27663	0.444107	6.37708	10.5559	9.36629
195.5	-3.53168	0.47821	1.50949	7.43925	11.7602	10.5803
196.5	-3.42862	1.14938	2.06287	7.82417	12.089	11.1482
197.5	-3.09019	1.72243	2.69576	8.32838	12.4751	11.8892
198.5	-3.02574	2.09204	2.73709	8.34653	12.8219	11.9545
199.5	-2.56895	2.1682	3.11263	8.81831	13.0334	12.0524
200.5	-2.76721	2.18907	2.82428	8.66902	12.9846	12.145
201.5	-2.54292	1.93539	2.53146	8.77785	12.9911	11.9594
202.5	-2.43417	2.08868	2.47771	8.88707	12.8733	12.0115
203.5	-2.70712	1.90018	2.72139	8.4973	13.0933	11.8847
204.5	-2.09581	2.30055	2.85817	8.85855	13.3549	12.1224
205.5	-1.80174	2.36009	3.47021	8.92581	13.364	12.2333
206.5	-1.89418	2.47156	3.38246	9.08363	13.6214	12.466
207.5	-1.91214	2.53922	3.19949	8.783	13.7065	12.3687
208.5	-1.86371	2.27657	3.44052	8.88722	13.5672	12.5117
209.5	-1.57808	2.34697	3.41599	8.96066	13.7293	12.4155
210.5	-1.92729	3.09705	3.5992	8.85933	13.7952	11.9969
211.5	-1.76956	3.18649	3.54927	8.66606	13.577	12.1861
212.5	-1.82706	1.74399	3.47607	8.42638	13.3139	11.8762
213.5	-1.78947	1.79439	3.45569	8.59918	13.0542	11.5592
214.5	-1.28494	2.58557	3.57959	8.82521	13.4119	11.7289
215.5	-1.47464	2.45314	3.23599	8.70818	13.22	11.5577
216.5	-1.79527	2.56439	3.21169	8.75191	13.424	11.6777
217.5	-2.03035	2.27899	2.97295	8.33167	13.2592	11.4867
218.5	-2.0437	2.31946	2.89342	8.48169	13.0694	11.4641
219.5	-1.95738	2.52016	3.10199	8.578	13.2066	11.8723
220.5	-2.0134	2.72977	3.02428	8.55519	13.3983	11.9923
221.5	-1.66167	2.13306	3.15373	8.70355	13.3144	11.673
222.5	-1.33652	2.15149	3.38724	8.5302	13.1555	12.1267
223.5	-1.69675	2.21376	3.28694	8.43552	13.082	11.4799
224.5	-1.89824	2.21744	3.47302	8.24254	12.7602	11.6306
225.5	-1.65887	2.3157	3.51497	8.13948	13.0175	11.2628
226.5	-1.78401	2.45399	3.40497	7.93175	12.8206	11.4534
227.5	-1.72595	2.57619	3.55452	8.23802	12.7534	11.5675
228.5	-1.88167	2.37868	3.2235	8.23442	12.618	11.4259
229.5	-1.38081	2.49979	3.57608	8.17372	12.6099	11.7541
230.5	-1.61026	2.30118	3.71365	8.1116	12.9696	11.6879
231.5	-2.01855	2.39204	3.44238	7.87222	12.7172	11.4966
232.5	-2.02551	2.30618	3.08536	7.55151	12.7487	11.5265
233.5	-1.95714	2.35023	2.96263	7.34949	12.9008	11.368
234.5	-2.05862	1.97923	2.83833	7.28441	12.4243	11.245
235.5	-1.72418	2.08727	3.15013	7.67761	12.6406	11.8064
236.5	-2.05676	1.96788	2.90262	7.74417	12.7211	11.5269
237.5	-2.3044	1.75259	2.75841	7.377	12.5371	11.4296
238.5	-2.05667	2.33476	2.86333	7.8895	12.9137	11.3992
239.5	-2.10637	2.22937	3.1595	7.85292	12.8366	11.1804
240.5	-1.83417	2.72002	3.39725	7.96004	13.0637	11.5217
241.5	-2.30527	2.53297	3.0367	7.75591	12.8412	11.3817
242.5	-2.10863	2.12181	3.00562	7.74754	12.9619	11.4586
243.5	-1.92348	1.99664	2.99716	7.86699	12.7686	11.5458
244.5	-2.03613	1.9671	2.74333	7.80386	12.6981	11.3454
245.5	-1.89926	1.74602	2.75294	7.86301	12.6629	11.261
246.5	-1.74629	1.69406	2.97279	8.02988	12.8397	11.369
247.5	-1.6123	2.17064	3.05341	8.11433	13.1672	11.5287
248.5	-1.68832	1.69563	2.79044	7.75418	12.6581	10.9828
249.5	-1.53636	1.69923	2.86334	7.89481	12.712	10.7999
250.5	-1.35324	2.38454	3.12787	7.96785	13.179	11.1274
251.5	-1.56596	1.96001	3.10138	7.71599	13.0662	10.8775
252.5	-1.40152	2.15877	3.34584	7.96223	13.445	10.9617
253.5	-1.67659	1.99548	3.52545	7.82973	13.3417	11.1814
254.5	-1.87331	1.90298	2.98866	7.81583	13.0088	11.0275
255.5	-1.66988	2.20712	3.20787	7.73402	13.257	11.1368
256.5	-1.8273	2.03313	3.40747	7.2809	13.1369	10.8329
257.5	-1.7012	2.13876	3.39217	7.61441	13.0556	10.9132
258.5	-1.70987	1.96461	3.1485	7.35091	12.8267	10.8233
259.5	-1.89316	1.75102	3.12764	7.49605	12.7479	10.5538
260.5	-1.4344	1.91103	3.01637	7.48418	12.8922	10.5875
261.5	-1.37439	1.64993	2.83733	7.48372	12.6455	10.4973
262.5	-1.71832	1.55125	2.93716	7.2691	12.4127	10.3942
263.5	-1.52338	2.07471	3.33139	7.36122	13.0657	10.5207
264.5	-1.77261	1.97821	3.27811	7.21489	12.7989	10.3817
265.5	-1.73363	1.88799	3.03146	7.50208	12.8254	10.1745
266.5	-1.67645	1.96399	2.98341	7.43941	12.5151	10.2878
267.5	-1.53471	1.90462	2.8952	7.48268	12.3888	10.3738
268.5	-1.90895	1.60664	2.71777	7.33377	12.3325	10.2737
269.5	-1.9384	1.58664	2.5374	7.21707	12.5218	10.0931
270.5	-2.23761	1.25299	2.36264	7.11496	11.911	9.72089
271.5	-2.17722	1.57759	2.5724	7.04262	11.9004	9.73503
272.5	-2.22644	1.63181	2.89272	7.41216	12.2001	10.2303
273.5	-2.07442	1.74602	2.92264	7.57286	12.1243	10.2549
274.5	-2.03229	1.79338	2.63124	7.89232	12.2655	10.3438
275.5	-2.29105	1.62798	2.76068	7.52768	11.7019	10.2792
276.5	-2.05402	1.55446	3.10381	7.44058	11.8841	10.3403
277.5	-2.05815	1.36993	2.89967	7.28966	11.7609	10.1911
278.5	-1.84979	1.37422	3.04552	7.39113	11.8136	10.3771
279.5	-2.00496	1.5379	2.7124	7.43433	11.8227	10.2733
280.5	-2.04918	1.55133	2.83583	7.48535	11.6878	10.1976
281.5	-1.96324	1.61884	2.67787	7.72684	11.5495	9.93924
282.5	-1.99152	1.41032	2.63185	7.36005	11.538	10.0265
283.5	-1.91455	1.52368	2.77139	7.29286	11.6592	10.3572
284.5	-1.92307	1.76854	2.69498	7.35887	11.7389	10.4762
285.5	-1.4391	1.99562	3.24371	7.42386	12.14	10.6975
286.5	-1.66347	1.84946	2.90138	7.1234	11.8494	10.6267
287.5	-2.16737	1.41829	2.57819	6.842	11.7017	10.05
288.5	-2.06551	1.2379	2.67082	7.01237	11.5923	9.79025
289.5	-1.85658	1.58588	2.88084	7.23146	12.0326	10.2446
290.5	-2.03714	1.65649	2.84451	7.10583	11.8841	9.91777
291.5	-1.84691	1.74774	2.73013	7.14113	11.8176	10.0657
292.5	-1.50206	1.81219	3.07114	7.63239	12.105	10.431
293.5	-1.82503	1.73579	2.79669	7.41832	12.0537	10.0945
294.5	-1.98027	1.56009	2.90154	7.14145	12.0487	9.83229
295.5	-1.88933	1.40727	2.9449	6.86816	11.9824	9.70135
296.5	-1.45425	1.76875	2.93169	7.36877	11.9982	10.0842
297.5	-0.98283	1.83612	3.21069	7.25871	12.2076	10.5408
298.5	-1.43213	1.95525	3.39046	7.11301	12.1951	10.2931
299.5	-1.66081	1.9382	2.95044	7.06784	12.2086	10.1487
300.5	-1.72769	1.49384	2.72029	6.96957	11.8159	9.66705
301.5	-1.67691	1.61	2.96333	7.01979	11.8106	9.81229
302.5	-1.83456	2.02734	3.11028	7.09901	11.9715	9.81853
303.5	-1.44902	2.02509	3.07286	7.35315	12.1834	10.0835
304.5	-1.51839	2.00681	3.16287	7.59622	12.3282	10.385
305.5	-1.71996	2.20963	2.87888	7.17348	12.0804	10.3082
306.5	-1.74606	2.21664	3.05153	7.35825	12.2222	10.5125
307.5	-1.51863	2.11766	3.10646	7.48909	12.348	10.3689
308.5	-1.53502	2.53517	3.2753	7.69005	12.7256	10.4632
309.5	-1.74144	2.07767	3.19585	7.43871	12.1984	10.1233
310.5	-1.6862	1.99651	2.80296	7.14169	12.2619	10.0825
311.5	-1.62801	1.95087	2.72052	7.14746	12.3129	10.1758
312.5	-1.59198	1.98064	2.54739	7.03644	12.277	9.94995
313.5	-1.57973	1.98665	2.53342	7.09801	12.0797	10.1056
314.5	-1.61589	2.15501	2.77069	7.23332	12.1135	9.89276
315.5	-1.41223	2.17563	2.66763	7.30621	12.2904	10.0098
316.5	-1.25214	1.99571	2.53326	7.09169	12.0519	9.95338
317.5	-1.2952	2.17999	2.50566	7.07167	12.2087	9.93829
318.5	-1.65659	1.72665	2.31216	7.10809	11.7901	9.40839
319.5	-1.74519	1.82993	2.47137	7.23143	11.8061	9.84096
320.5	-1.36855	2.00938	2.64177	7.343	12.0334	10.1138
321.5	-1.1852	2.42392	2.85286	7.52339	11.9599	10.053
322.5	-1.22691	2.46399	2.65388	7.41081	12.1016	10.406
323.5	-1.10402	2.20555	2.55302	7.41411	12.3979	10.2839
324.5	-1.13815	2.269	2.91162	7.63457	12.2941	10.2471
325.5	-1.20441	2.32829	2.78435	7.74739	12.1237	10.132
326.5	-1.08659	2.4239	2.86559	7.28151	12.1686	10.1969
327.5	-0.6808	2.60158	2.97757	7.40434	12.46	9.9384
328.5	-0.94347	2.48314	2.75513	7.28535	12.2058	9.78128
329.5	-0.97174	2.4897	2.97185	7.30879	12.2387	9.6505
330.5	-0.87518	2.59282	2.99561	7.58395	12.3251	9.84987
331.5	-0.63956	2.68588	3.43709	7.45544	12.5729	9.96182
332.5	-0.87947	2.4436	2.79178	7.0831	12.2499	9.66542
333.5	-0.86714	2.50468	2.44786	7.13074	12.2101	9.49152
334.5	-1.02003	2.19603	2.47365	7.05637	12.2772	9.4594
335.5	-1.5316	1.82001	2.33215	6.55066	11.8705	9.03752
336.5	-1.95543	1.82736	2.34004	6.65973	11.6572	9.39745
337.5	-1.40901	2.09875	2.59521	7.11215	12.1705	9.47377
338.5	-1.46973	1.99899	2.64169	7.13918	11.9761	9.41628
339.5	-1.08714	2.02486	2.30536	7.25441	11.8916	9.73448
340.5	-1.30362	1.92635	2.56732	7.39607	11.9265	9.71448
341.5	-1.30379	2.23047	2.50661	7.61089	12.3333	9.78932
342.5	-1.13332	2.19704	2.39427	7.59518	12.2168	9.74042
343.5	-0.94832	2.2997	2.61044	7.72987	12.1848	9.81526
344.5	-1.149	2.32088	2.37466	7.67247	11.8796	9.6051
345.5	-1.10121	2.0361	2.27208	7.52309	12.2445	9.5672
346.5	-1.08885	1.97946	2.12802	7.62122	12.2701	9.8998
347.5	-1.47144	1.78165	2.03537	7.3284	12.0299	9.91212
348.5	-1.59799	1.72072	2.06381	7.16872	12.086	9.63574
349.5	-1.46252	1.72963	2.44826	6.95317	12.3558	9.56956
350.5	-1.41426	1.83757	2.30341	7.03987	12.0407	9.82962
351.5	-0.98941	2.09625	2.74286	7.17285	12.0747	9.7894
352.5	-1.41628	1.89844	2.54091	7.07277	11.9248	9.38956
353.5	-1.61346	1.69563	2.61842	6.99269	11.8238	9.38058
354.5	-1.73486	1.38174	2.34171	6.53896	11.8486	9.08635
355.5	-1.47925	1.38564	2.31786	6.59605	12.0546	9.42198
356.5	-1.38184	1.55267	2.45522	6.99309	12.1205	9.69284
357.5	-1.42473	1.46962	2.08498	6.78964	11.9936	9.7151
358.5	-1.52792	1.72047	2.15942	6.55659	12.0789	9.60306
359.5	-1.33339	2.00197	2.43248	7.01489	12.2473	9.73824
360.5	-1.38229	1.82462	2.26083	7.19972	12.334	9.66698
361.5	-1.20033	1.66815	2.37975	6.94373	12.3005	9.67426
362.5	-1.47784	1.77797	2.14169	7.12378	12.4158	9.68463
363.5	-1.4348	1.77039	2.16631	6.68668	12.3492	9.68704
364.5	-1.66472	1.56578	2.06224	6.54723	12.2459	9.5551
365.5	-1.60684	1.70773	1.96278	6.69878	12.3821	9.43611
366.5	-1.45746	1.55916	1.92685	6.55208	12.2785	9.17503
367.5	-1.30589	1.72328	2.03177	6.93097	12.3242	9.28252
368.5	-0.61887	2.27501	2.28238	7.34293	12.5644	10.0206
369.5	-1.11028	2.10524	1.94536	6.94496	12.081	9.43346
370.5	-1.45503	1.88766	1.94685	6.71552	11.8558	9.18675
371.5	-1.26706	2.04587	1.90552	6.72849	11.9109	9.04097
372.5	-1.38713	1.94409	1.90475	6.9174	11.8522	9.39856
373.5	-1.44174	1.76877	2.04013	6.88153	11.8246	9.44183
374.5	-1.14519	1.77579	1.98193	7.02223	11.919	9.39908
375.5	-0.993	1.89212	2.15506	7.15965	12.1162	9.54964
376.5	-1.43996	1.56758	2.21443	6.99472	11.8177	9.59198
377.5	-1.20753	1.72736	2.24614	7.2598	11.9873	9.78479
378.5	-1.02728	1.93518	2.36647	7.08147	12.4894	9.8766
379.5	-0.67793	2.15915	2.2845	7.12495	12.5181	10.046
380.5	-0.75394	2.00439	2.17834	7.04356	12.1805	9.56909
381.5	-0.99042	1.65079	2.44778	6.85114	12.0676	9.54495
382.5	-1.26012	2.10829	2.24199	6.91449	12.0922	9.75244
383.5	-1.49815	1.7832	2.23099	6.59448	11.779	9.53119
384.5	-1.39987	1.73291	2.20341	6.32645	11.5687	9.56761
385.5	-1.51019	1.53804	1.88887	6.41026	11.5925	9.59767
386.5	-1.71559	1.65515	1.70271	6.14268	11.5343	9.30064
387.5	-1.58629	1.80759	1.86333	6.19261	11.544	9.68706
388.5	-1.67572	1.42267	1.80334	6.18513	11.3922	9.65628
389.5	-1.95714	1.39244	1.75632	6.09685	11.2837	9.43684
390.5	-1.69659	1.32806	1.61787	5.92746	11.1254	9.34012
391.5	-1.64612	1.65657	1.79553	6.16098	11.1578	9.48714
392.5	-1.62871	1.89806	1.94724	6.09027	11.1529	9.59073
393.5	-1.39465	1.89726	2.33427	6.26683	11.4426	9.8165
394.5	-1.61206	1.88196	2.03365	6.40948	11.2629	9.39462
395.5	-1.49605	1.65814	1.78912	6.37489	11.1908	9.4801
396.5	-1.26166	1.85228	1.89975	6.28668	11.512	9.66489
397.5	-1.23236	1.7126	1.83615	6.38066	11.6878	9.39854
398.5	-1.15465	1.78969	2.15967	6.50566	11.6922	9.52705
399.5	-1.04417	1.94118	2.19981	6.3102	11.4319	9.65854
400.5	-1.00543	1.79422	2.56584	6.3477	11.5158	9.52791
401.5	-1.21925	1.66048	2.2074	6.32144	11.1805	9.47134
402.5	-1.31136	1.83252	2.33272	6.30013	11.8337	9.67957
403.5	-1.05206	1.60266	2.06645	6.27161	11.6673	9.77815
404.5	-0.86745	1.71213	2.05006	6.72528	11.563	9.49324
405.5	-0.84645	1.89445	2.34029	6.76558	11.6642	9.45323
406.5	-0.89291	2.10315	2.54202	6.91652	11.383	9.68355
407.5	-0.90279	2.14937	2.69824	6.94542	11.7677	10.0473
408.5	-0.94113	2.23657	2.53294	6.98918	11.984	9.77049
409.5	-0.80119	2.4825	2.74997	7.15808	12.1406	10.0691
410.5	-0.97432	1.96478	2.60538	7.177	12.1151	10.1555
411.5	-0.92426	2.35524	2.43755	7.18533	12.3306	9.81923
412.5	-0.90628	1.95071	2.46233	7.05833	12.1534	9.60535
413.5	-1.22665	2.10057	2.47084	6.76114	11.6782	9.61378
414.5	-1.25784	2.06017	2.41458	7.00145	11.8777	9.57471
415.5	-1.04573	2.37845	2.8678	7.12645	12.0965	9.80432
416.5	-0.71933	2.53157	2.7999	7.51442	12.2758	10.1768
417.5	-1.15636	2.30423	2.36562	7.29106	12.1994	10.0296
418.5	-0.87854	2.40892	2.68889	7.29521	12.0204	9.96558
419.5	-1.15698	2.22078	2.50169	6.99034	11.5426	9.79689
420.5	-1.21347	2.1543	2.50739	7.08347	11.7805	9.84424
421.5	-0.71895	2.21344	2.77957	7.39542	12.3836	10.0174
422.5	-0.92401	2.09703	2.41145	7.33301	12.1556	9.83667
423.5	-0.92293	2.01369	2.10576	7.08784	11.8326	9.96347
424.5	-0.89612	1.95477	2.27403	6.95746	12.0178	10.1381
425.5	-0.7623	2.22157	2.44936	7.06606	12.4284	9.90237
426.5	-0.53073	2.41595	2.64091	7.47276	12.5597	10.3162
427.5	-0.81035	2.14134	2.42662	7.1938	12.2436	10.1941
428.5	-0.99434	2.17798	2.41872	6.99316	12.237	10.1321
429.5	-0.95276	2.22447	2.31584	6.99316	12.2422	10.1253
430.5	-0.983	2.10063	1.90311	6.94872	11.7235	10.0765
431.5	-0.98901	2.28883	2.0659	6.91011	11.8202	9.74948
432.5	-1.04323	2.42033	2.02966	7.11176	11.9351	9.6566
433.5	-0.96986	2.2851	2.16647	7.10472	11.8309	9.61902
434.5	-0.91895	2.35283	2.32364	7.13957	12.0311	9.81596
435.5	-1.02597	2.51462	2.56709	7.06473	12.1108	9.89572
436.5	-0.89354	2.56642	2.42194	6.98372	11.9526	10.0125
437.5	-0.6712	2.58328	2.6413	7.343	11.8845	9.99681
438.5	-0.84229	2.45079	2.34647	6.93317	11.7983	10.0475
439.5	-1.09753	2.01297	2.29771	6.96527	11.8675	9.75908
440.5	-0.44363	2.16414	2.43098	6.98137	12.1597	9.49744
441.5	-0.58231	2.19633	2.33185	6.80316	12.125	9.49205
442.5	-0.67902	2.33768	2.42076	6.90559	12.5331	10.1082
443.5	-0.96307	2.44923	2.13741	6.86755	12.0388	10.0325
444.5	-0.55402	2.5807	2.17264	7.14082	12.1201	10.147
445.5	-0.8748	2.0536	1.94067	6.92162	11.9587	9.83089
446.5	-1.01808	1.98329	1.98373	6.81285	11.8591	9.84752
447.5	-1.05144	1.86227	2.03442	6.90981	11.8287	9.92439
448.5	-0.81238	1.87727	2.09457	6.97919	11.817	9.78737
449.5	-0.60104	1.97493	2.3513	7.29535	11.8763	9.81862
450.5	-0.78143	1.73409	2.34889	7.15785	11.8819	9.72729
451.5	-0.52229	1.68033	2.39101	6.91769	12.03	9.90176
452.5	-0.68816	1.50821	2.21568	6.33763	11.968	9.79816
453.5	-0.76566	1.33524	2.22247	6.32339	11.955	10.0156
454.5	-0.48262	1.56001	2.00388	6.64894	11.9052	9.96939
455.5	-0.63893	1.49734	2.28177	6.65575	11.9519	9.94447
456.5	-0.88989	1.64015	2.19894	6.36371	11.8238	9.53439
457.5	-0.95323	1.71228	2.00742	6.31152	11.7218	9.39809
458.5	-1.3605	1.56837	1.86655	6.19527	11.4967	9.27448
459.5	-0.87167	2.18359	2.23785	6.42268	11.9636	9.85182
460.5	-0.66229	2.44345	2.52551	6.68347	12.2843	9.99643
461.5	-0.96167	2.22189	2.07521	6.48051	11.6783	9.89276
462.5	-1.22768	2.09666	1.81725	6.29028	11.5562	9.56714
463.5	-1.24254	1.79008	1.6088	6.15167	11.517	9.20213
464.5	-1.04434	1.87329	1.91731	6.11418	11.575	9.45314
465.5	-1.08878	2.00087	1.99615	6.34567	11.7708	9.62698
466.5	-0.92471	2.5022	2.18028	6.44714	11.6913	9.93254
467.5	-0.93527	2.2265	1.86497	6.44926	11.7337	9.86682
468.5	-1.04723	2.18672	1.52005	6.22113	11.7686	9.40346
469.5	-1.18262	1.92555	1.59544	6.53426	11.7022	9.70526
470.5	-0.88487	1.90033	1.84639	6.71567	11.6472	9.57948
471.5	-0.96159	1.94305	1.65709	6.69293	11.3871	9.32909
472.5	-0.75644	1.99188	1.5634	6.62315	11.569	9.64722
473.5	-0.75496	1.79704	1.38443	6.3766	11.4841	9.39502
474.5	-0.61893	1.86978	1.69695	6.5338	11.7374	9.61887
475.5	-0.57605	2.20532	1.96513	6.56856	12.0285	9.84261
476.5	-0.47832	2.01289	2.00755	6.56293	12.0897	9.91432
477.5	-0.63019	1.71657	1.78827	6.45215	11.8225	9.44566
478.5	-0.97104	1.40259	1.66663	6.25661	11.8079	9.12292
479.5	-1.08589	1.65048	1.54224	6.26457	11.8087	9.27026
480.5	-1.27254	1.51039	1.51186	6.27097	11.8571	9.25722
481.5	-0.99182	1.53329	1.47975	6.4127	11.8332	9.25206
482.5	-0.81934	1.69939	1.61256	6.51199	11.7346	9.52792
483.5	-0.4595	1.97804	1.70996	6.43034	11.6531	9.7547
484.5	-0.65878	2.19681	1.41911	6.6252	11.6942	9.58128
485.5	-0.68292	1.93634	1.47279	6.73395	11.7701	9.51105
486.5	-0.55066	2.0007	1.69208	6.69614	11.7385	9.41861
487.5	-0.45027	2.34595	1.53091	6.93207	11.6536	9.53885
488.5	-0.97801	2.36977	1.41685	6.26761	11.6676	9.224
489.5	-0.55612	1.8979	1.72543	6.18362	11.2243	8.83885
490.5	-0.47057	2.05415	1.78796	6.33638	11.4305	8.88612
491.5	-0.45651	2.18658	1.73444	6.40005	11.3063	9.0791
492.5	-0.33855	2.16821	1.70123	6.39653	11.3395	8.98846
493.5	-0.47527	2.46899	1.83443	6.69261	11.5333	8.93143
494.5	-0.5909	2.42212	1.68481	6.34378	11.3399	8.5705
495.5	-0.08699	2.4061	2.05553	6.52425	11.504	8.98729
496.5	-0.25964	2.17796	1.73169	6.42035	11.0176	8.71033
497.5	-0.24908	2.16354	1.67897	6.64888	11.1298	8.64082
498.5	-0.13112	2.34634	1.62115	6.60785	11.0133	8.66972
499.5	-0.29051	2.61429	1.83638	6.74535	11.3665	8.87166
500.5	-0.21901	2.70767	1.80162	6.68208	11.7903	9.02284
501.5	-0.24362	2.7057	1.74223	6.57542	11.4712	9.03221
502.5	-0.24599	2.25336	1.80591	6.64183	11.3161	8.85173
503.5	-0.53348	1.75533	1.39615	6.35747	10.9778	8.34431
504.5	-0.44754	1.97406	1.47308	6.31526	10.9614	8.39978
505.5	-0.51277	2.25728	1.41843	6.4063	11.1075	8.59082
506.5	-0.20886	2.46548	1.6485	6.52621	11.3333	9.00642
507.5	-0.12643	2.2057	1.75983	6.34418	11.3172	9.05487
508.5	-0.35768	2.22055	1.79576	6.22621	11.1512	8.5533
509.5	-0.42799	1.80338	1.81178	6.37114	11.1809	8.3541
510.5	-0.53737	1.67055	1.65747	6.54964	10.9563	8.36151
511.5	-0.59869	1.54556	1.33795	6.39458	10.7669	7.94276
512.5	-0.47371	1.64673	1.26959	6.44107	10.7942	8.21503
513.5	-0.63269	1.48384	1.34419	6.57036	10.6442	8.12558
514.5	-0.56393	1.64282	1.42622	6.37425	10.8778	8.17714
515.5	-0.1741	1.69203	1.6442	6.14105	11.1286	8.16269
516.5	-0.1452	1.47758	1.5481	6.35316	10.9294	8.12518
517.5	-0.17801	1.44205	1.73051	6.34769	11.118	8.24002
518.5	0.025513	1.87485	1.9735	6.6563	11.3657	8.69785
519.5	-0.11511	1.65102	1.80083	6.26996	11.1016	8.3287
520.5	-0.21353	1.97096	1.97545	6.55981	11.1344	8.77168
521.5	-0.05299	1.89439	1.64537	6.62074	11.2594	8.65761
522.5	-0.5159	1.4471	1.14223	6.41019	10.8063	8.26892
523.5	-0.57526	1.8979	1.16295	6.55121	11.1809	8.52051
524.5	-0.16629	2.12445	1.27934	6.64613	11.5688	8.7115
525.5	-0.52371	1.52797	0.780533	6.23636	10.9133	8.20604
526.5	-0.54674	1.76939	1.0567	6.18364	11.0094	8.60332
527.5	-0.52293	1.57875	1.09029	6.27034	10.8114	8.42596
528.5	-0.2444	1.87955	1.39693	6.55356	11.0372	8.56111
529.5	0.05365	2.11353	1.39304	6.468	11.1837	8.69121
530.5	0.075531	1.72681	1.25201	6.16566	11.1071	8.2623
531.5	0.218872	2.08463	1.41568	6.45552	11.3024	8.50449
532.5	0.173935	1.9846	1.50356	6.31096	11.2618	8.51266
533.5	-0.02293	1.97406	1.67036	6.35043	11.3329	8.45642
534.5	-0.04088	2.10922	1.56099	6.50941	11.1114	8.24042
535.5	-0.01236	2.25963	1.69069	6.46841	11.4528	8.38652
536.5	-0.13464	2.16782	1.76216	6.39729	11.552	8.37479
537.5	0.014572	2.43149	1.63951	6.57309	11.4711	8.43378
538.5	-0.4034	2.13266	1.42505	6.27464	11.429	7.99863
539.5	-0.10613	2.58304	1.62622	6.23636	11.4614	8.55408
540.5	-0.18112	2.41899	1.90982	6.34691	11.2817	8.53612
541.5	-0.19049	2.25963	1.84343	6.02271	11.2227	8.40565
542.5	-0.07487	2.33112	2.03639	6.27779	11.2989	8.37988
543.5	-0.24753	2.18736	1.97623	5.91801	11.1883	8.13533
544.5	-0.25261	2.26509	1.92857	6.14574	11.3055	8.39822
545.5	-0.15067	2.4565	1.74811	6.43246	11.1434	8.32362
546.5	0.295044	2.26743	2.06645	6.39925	11.3594	8.48885
547.5	0.470047	2.65688	2.2235	6.66216	11.4426	8.69197
548.5	0.274734	2.55064	2.22623	6.66801	11.4696	8.76659
549.5	0.401306	2.42447	2.32585	6.18207	11.4813	8.65645
550.5	0.400131	2.52525	2.13953	6.29379	11.4364	8.6584
551.5	-0.03426	2.54594	2.0856	6.24496	11.3712	8.41933
552.5	0.514969	2.60884	2.13989	6.23518	11.6856	8.74159
553.5	0.243088	2.4104	1.8942	6.10278	11.6004	8.85292
554.5	0.203247	2.67564	2.02428	6.03871	11.645	8.59744
555.5	0.131775	2.5358	1.95749	6.00435	11.443	8.59666
556.5	0.00208	2.39751	1.55122	5.877	11.0704	8.53574
557.5	-0.12643	2.42915	1.54459	5.83676	11.1309	8.55447
558.5	-0.15418	2.58228	1.46645	5.94028	11.4383	8.42519
559.5	-0.15692	2.17445	1.03052	5.60081	11.1582	8.24626
560.5	-0.01668	2.32915	1.63676	5.90393	11.3313	8.58768
561.5	0.032166	2.41431	1.74303	5.96411	11.5962	8.78065
562.5	-0.10104	2.21626	1.59146	5.79457	11.3797	8.55682
563.5	-0.12175	2.35844	1.8485	5.91722	11.3403	8.66307
564.5	-0.16705	2.51782	2.00514	6.06841	11.2696	8.6076
565.5	-0.47176	2.29788	1.77661	5.82269	11.0993	8.55721
566.5	-0.41667	2.46939	1.97935	6.0766	11.154	8.6037
567.5	-0.5737	2.68892	1.71217	5.68872	10.8661	8.40448
568.5	-0.38348	2.77484	1.72191	5.85745	10.9032	8.53026
569.5	-0.43738	2.63539	1.72661	5.98323	10.82	8.44432
570.5	-0.55457	2.80688	1.73169	5.92308	11.018	8.67792
571.5	-0.7944	2.30611	1.7653	5.80629	10.493	7.98729
572.5	-0.69792	2.36743	1.90161	6.00471	10.6184	8.10135
573.5	-0.5788	2.33774	1.84262	5.84418	10.4958	8.33572
574.5	-1.20259	1.95143	1.41295	5.95044	10.2231	8.05098
575.5	-0.75183	1.98619	1.52037	5.71722	10.2501	8.06699
576.5	-0.85535	1.88306	1.5067	5.64302	10.0469	7.94354
577.5	-0.50847	2.40572	1.70514	6.11879	10.7317	8.54277
578.5	-0.70026	2.09361	1.61296	6.22466	10.361	8.4545
579.5	-0.3784	2.11351	1.72115	6.23167	10.7348	8.33846
580.5	-0.48035	2.01469	1.90163	6.31137	10.4219	8.63963
581.5	-0.30924	2.43658	2.30905	6.57779	10.8083	8.76582
582.5	-0.67801	2.05962	1.92038	5.94849	10.6071	8.49081
583.5	-0.96004	2.12367	1.88481	6.16058	10.4868	8.39432
584.5	-0.51822	2.33072	2.26413	6.32661	10.7559	8.56308
585.5	-0.66666	1.85924	1.92155	6.00122	10.8458	7.94434
586.5	-0.77565	1.82994	1.66528	5.90004	10.4766	8.14238
587.5	-0.91864	1.80179	1.44614	5.90588	10.6707	7.96072
588.5	-0.98778	1.92603	1.42896	5.89378	10.6946	8.28807
589.5	-0.94051	2.09673	1.5735	6.10239	10.6567	8.16151
590.5	-0.50964	2.45377	2.04263	6.29964	11.034	8.48769
591.5	-0.28893	2.5061	2.25514	6.63364	11.5743	8.62987
592.5	-0.68385	2.5229	1.82193	6.18481	11.0567	8.25995
593.5	-0.73892	2.30142	2.02818	6.28442	11.2782	8.43262
594.5	-0.77838	2.42094	2.05475	5.96294	11.0969	8.31699
595.5	-0.57019	2.14713	1.90552	5.94536	10.677	8.23846
596.5	-0.65691	2.15337	1.62662	5.96449	10.8344	8.24393
597.5	-0.68424	1.97487	1.63991	5.80591	10.9091	8.35489
598.5	-0.63387	2.44398	1.55864	6.03481	11.4305	8.44745
599.5	-0.58972	2.71977	1.5274	6.13519	11.2137	8.6498
600.5	-0.62135	2.83774	1.74771	6.03754	11.2161	8.60876
601.5	-0.7319	2.70923	1.80435	6.08676	11.1426	8.7666
602.5	-1.18307	2.26666	1.23288	5.56802	11.0969	8.49394
603.5	-1.09285	2.1608	1.49693	5.61879	10.9907	8.40565
604.5	-0.72098	2.29672	1.35201	5.84261	10.8434	8.27751
605.5	-0.81041	2.06432	1.17545	5.54184	10.8044	8.32285
606.5	-3.24362	1.91861	1.09302	2.34302	11.3551	6.69823
607.5	-0.96237	0.988129	3.40396	6.81293	10.9118	9.9705
608.5	0.264984	1.79243	0.19577	7.28871	11.3567	10.5514
609.5	-0.28972	1.87251	0.828964	6.22424	10.8481	8.96542
610.5	-0.44128	2.08658	1.31842	5.83714	10.5188	8.26971
611.5	-0.38738	2.34439	1.26724	5.577	10.5516	7.97049
612.5	-0.60301	1.88031	1.15083	5.31371	10.0454	7.74002
613.5	-0.91979	1.93111	1.31372	5.60591	10.2114	7.85526
614.5	-0.07292	2.29634	1.04692	5.68324	9.53677	7.91931
615.5	0.502075	3.46469	0.511002	6.46722	9.28131	8.49355
616.5	0.101288	3.53461	1.63756	7.91489	10.234	8.80798
617.5	0.022003	3.14946	2.51254	9.12387	10.9946	8.62206
618.5	-0.4491	2.82289	2.36217	9.23753	10.6266	8.76112
619.5	-0.1776	2.86665	2.18796	9.04068	10.3743	8.5623
620.5	-0.39949	2.62094	2.07817	8.67308	10.4016	7.94823
621.5	-0.29285	2.76312	2.05083	8.47151	10.1665	7.88142
622.5	-0.51158	2.72916	1.87975	8.44966	9.836	7.59941
623.5	-0.29401	2.99596	2.3063	9.10201	9.98483	7.97754
624.5	0.129807	3.00804	2.33208	9.02425	10.0719	8.28534
625.5	-0.19948	3.0061	2.31841	8.99184	10.3071	8.64354
626.5	-0.18893	2.99478	2.4274	9.05591	9.90475	8.67831
627.5	-0.03033	2.9151	2.15396	8.74574	10.0454	8.7162
628.5	0.034515	2.75221	2.21255	8.43677	10.0731	8.42871
629.5	-0.12291	2.68971	1.88132	8.54068	9.74733	8.36739
630.5	-0.02409	2.96429	1.87975	8.69417	10.0618	8.88182
631.5	0.289963	3.46664	2.40356	9.05785	10.5165	9.0576
632.5	0.158707	3.42485	2.06255	8.99535	10.377	9.06464
633.5	0.016541	3.1815	2.1274	8.9227	10.2301	8.83691
634.5	0.241928	3.18266	2.53169	9.13754	10.284	8.8119
635.5	0.177856	3.02602	1.92427	8.95979	10.4543	8.98454
636.5	0.195053	3.20885	2.03795	9.17387	10.4005	8.9537
637.5	-0.2991	2.91977	2.03169	8.98245	10.3559	8.80095
638.5	-0.3241	3.04947	2.20943	9.25981	10.5766	8.88808
639.5	-0.24442	3.14516	2.17114	9.48831	10.3688	8.93573
640.5	-0.30067	3.04555	1.8934	9.49574	10.2317	8.95915
641.5	-0.19089	3.19946	1.71373	9.52621	10.3665	8.89081
642.5	-0.04715	3.55023	2.13559	9.52582	10.2626	9.0701
643.5	-0.00183	3.19711	1.99263	9.36684	10.3501	8.82167
644.5	0.138794	3.24048	2.19458	9.32191	10.3168	8.86542
645.5	0.088013	3.35727	2.18091	9.18636	10.4895	8.71698
646.5	-0.32996	3.04907	2.18637	9.10002	10.3223	8.67557
647.5	-0.67175	2.8354	1.78755	8.90395	9.99263	8.69432
648.5	-0.5397	2.9151	1.8813	9.06059	10.4165	8.62245
649.5	-0.33737	2.74086	1.47661	9.08519	10.0852	8.58728
650.5	-0.3237	2.86469	1.56685	9.14966	10.3797	8.72322
651.5	-0.35613	2.72133	1.73131	9.23598	10.0126	8.92479
652.5	-0.48738	2.69594	1.58012	9.13908	9.88599	8.87439
653.5	-0.38464	2.80493	1.56998	8.82074	9.7278	8.79668
654.5	-0.55223	2.75336	1.6731	9.12621	9.8102	8.93651
655.5	-0.47917	2.89243	1.74028	9.21996	10.2426	9.26385
656.5	-0.29129	2.71234	1.53912	9.10941	10.1348	9.05096
657.5	-0.08698	2.18071	1.336	8.8145	9.90045	8.7459
658.5	-0.05222	2.60844	1.63403	9.17114	10.3071	9.07988
659.5	-0.26784	2.43033	1.60358	9.15472	9.98366	8.65488
660.5	-0.37331	2.41899	1.7731	9.0313	10.2407	8.65683
661.5	-0.34909	2.40846	2.01138	9.01099	10.5247	8.858
662.5	-0.32059	2.40103	1.84459	8.78481	10.1098	8.65369
663.5	-0.34517	2.38971	1.58678	8.81645	10.1641	8.69434
664.5	-0.63425	2.35846	1.30357	8.7641	9.97702	8.42168
665.5	-0.13855	2.39204	1.53871	8.86839	10.1981	8.59784
666.5	-0.33035	2.15103	1.47507	8.58714	10.0032	8.63104
667.5	-0.15025	2.38618	1.55592	8.85591	10.2219	8.6041
668.5	-0.2112	2.47798	1.7852	9.00551	10.0934	8.8826
669.5	-0.45184	2.21234	1.6442	8.6684	10.0594	8.37048
670.5	-0.66863	2.37289	1.64224	8.75433	9.8188	8.36931
671.5	-0.86942	2.23579	1.72583	8.67621	10.0223	8.44667
672.5	-0.57643	2.21236	1.46413	8.80278	9.9942	8.25526
673.5	-0.57526	2.31314	1.56216	9.02426	10.0766	8.50058
674.5	-0.66354	2.31705	1.57701	8.92934	9.89226	8.20251
675.5	-0.6483	2.02994	1.4903	8.677	10.0278	8.44354
676.5	-0.39636	2.1936	1.7692	8.83441	10.3801	8.5287
677.5	-0.49791	2.22096	1.41139	8.51958	9.97858	8.35956
678.5	-0.3409	2.32915	1.79732	8.56996	9.96997	8.65643
679.5	-0.31043	2.38033	1.73169	8.73831	10.2106	8.57166
680.5	-0.08308	2.58421	2.07388	8.86176	10.4313	9.10095
681.5	0.014191	2.58853	2.23053	9.10472	10.7848	8.89549
682.5	0.152481	2.5647	2.24341	9.07974	10.7317	9.21581
683.5	0.101685	3.05258	2.30122	9.02934	10.734	8.88182
684.5	0.206772	3.01236	2.26802	9.26958	10.634	8.86777
685.5	0.043884	2.70807	2.02155	9.03481	10.5868	8.82245
686.5	-0.00143	2.73111	2.00395	8.81371	10.5208	8.83533
687.5	0.164566	3.01743	1.85043	8.67113	10.6297	8.75409
688.5	-0.16394	2.89165	1.85201	8.63557	10.4985	8.64354
689.5	-0.24245	2.64166	1.93053	8.86255	10.8497	8.98222
690.5	-0.04988	2.82562	1.83949	8.74144	10.8508	8.6779
691.5	-0.30612	2.64438	1.62076	8.60159	10.5536	8.79353
692.5	0.150116	2.91626	2.07544	8.89769	10.7184	9.16034
693.5	-0.11238	2.57484	1.72974	8.37738	10.4751	8.79237
694.5	-0.21004	2.81078	1.46176	8.19261	10.2969	8.84744
695.5	-0.27293	2.94398	1.5641	8.51448	10.3887	8.89236
696.5	-0.32918	2.6729	1.586	8.65044	10.5981	8.73378
697.5	-0.28619	2.86862	2.02428	8.98247	10.5153	8.94472
698.5	-0.24908	2.73737	1.93443	9.05511	10.7536	8.97987
699.5	-0.19165	3.00923	1.57233	8.95004	10.843	9.09198
700.5	-0.27214	2.56352	1.4028	8.88716	10.5005	8.96933
701.5	-0.11083	2.74046	1.67152	9.19261	10.5708	8.87244
702.5	-0.24715	2.72095	1.68794	9.03285	10.4243	8.86151
703.5	-0.38425	2.32407	1.45943	8.83168	10.1911	8.59511
704.5	-0.42098	2.38071	1.39342	8.76566	10.3286	8.64043
705.5	-0.5284	2.46938	1.45708	8.51175	10.4817	8.44823
706.5	-0.20221	2.21626	1.40279	8.78558	10.2075	8.29863
707.5	0.168488	2.29517	1.66411	8.9559	10.0047	8.39549
708.5	-0.09987	2.21548	1.43443	8.81293	10.0297	8.33299
709.5	-0.5733	2.23619	1.43326	8.67075	10.0551	8.233
710.5	-0.37996	2.4393	1.52896	8.52151	10.1137	8.42519
711.5	-0.77799	2.30026	1.04811	8.35904	9.75983	7.87715
712.5	-0.52605	2.19478	1.10826	8.64262	9.95905	8.03612
713.5	-0.01395	2.60609	1.72154	9.11136	10.5294	8.57909
714.5	-0.25263	2.62602	2.03949	9.13127	10.443	8.62674
715.5	-0.43152	2.32446	1.6946	8.82114	10.0391	8.28769
716.5	-0.44597	2.46625	1.74809	8.86644	10.2899	8.36737
717.5	-0.19479	2.2229	1.95006	8.73285	10.3301	8.46542
718.5	-0.07683	2.21704	1.70865	8.63206	10.4563	8.67244
719.5	-0.42839	2.06625	1.76138	9.06136	10.6821	8.47089
720.5	-0.06824	2.45844	2.08325	9.14301	10.7657	8.78064
721.5	-0.29323	2.08775	1.75279	8.83481	10.4805	8.44862
722.5	-0.41745	2.1776	1.75632	8.64966	10.2446	8.42598
723.5	-0.59361	2.17447	1.77661	8.83598	9.95436	8.51463
724.5	-0.79128	1.91704	1.36841	8.69965	9.82193	8.1158
725.5	-0.94363	1.69321	1.13754	8.25082	9.80045	8.04198
726.5	-0.78464	2.04126	1.66763	8.69926	10.1841	8.39667
727.5	-0.86746	2.01508	1.34341	8.43362	9.98012	8.4283
728.5	-0.80728	1.99088	1.39655	8.61723	10.2048	8.45604
729.5	-0.79675	2.28305	1.55357	8.48363	10.0239	8.34862
730.5	-0.77214	2.57211	1.8477	8.87776	9.96489	8.60486
731.5	-1.02603	2.38618	1.4817	9.03755	9.83209	8.4541
732.5	-0.84557	2.61314	1.60397	8.82074	9.9024	8.51385
733.5	-0.77449	2.42876	1.52037	8.59027	9.76451	8.52362
734.5	-0.83699	2.75961	1.74301	8.5477	9.95123	8.72752
735.5	-0.74519	2.74556	1.96646	8.63597	10.1165	8.45253
736.5	-0.6862	2.44165	1.63208	8.57855	9.88326	8.29628
737.5	-0.5405	2.29439	1.63326	8.5817	9.80748	8.26347
738.5	-0.28229	2.29987	1.75435	8.71098	9.93794	8.4326
739.5	-0.51354	2.08032	1.39069	8.46294	9.88132	8.15175
740.5	-0.74362	1.8354	1.15826	8.43599	9.60553	8.06348
741.5	-1.00105	1.73579	1.22701	8.36761	9.33171	7.8744
742.5	-0.91159	2.01547	1.06139	8.30785	9.40904	8.15135
743.5	-0.59636	2.72643	1.58365	8.69691	10.0294	8.58183
744.5	-0.74831	2.48346	1.71999	8.38013	9.72351	8.26973
745.5	-0.62215	2.82954	1.70122	8.66216	9.90356	8.0869
746.5	-0.5401	3.00845	1.37506	8.50356	10.0251	8.30371
747.5	-0.53386	2.79752	1.57115	8.25356	10.0094	8.46072
748.5	-0.36705	2.6725	1.90749	8.54144	10.0641	8.47949
749.5	-0.66472	2.73657	1.66412	8.67465	9.8981	8.24472
750.5	-0.36119	2.5569	1.47662	8.48051	9.78836	8.26114
751.5	-0.51393	2.49948	1.63365	8.32739	9.85242	8.14746
752.5	-0.72565	2.63071	1.56607	8.4684	10.0755	8.42558
753.5	-0.85535	2.64906	1.82974	8.47035	9.88911	8.57829
754.5	-0.78346	2.66782	1.65085	8.61528	9.79147	8.41309
755.5	-0.89754	2.70299	1.2731	8.43755	9.90944	8.23964
756.5	-0.69362	2.87251	1.59381	8.62505	10.154	8.61777
757.5	-0.80927	2.55649	1.42387	8.64847	10.284	8.36034
758.5	-0.98776	2.31665	1.12895	8.6684	10.0833	8.24901
759.5	-0.43268	2.39127	1.40163	8.3485	9.92038	8.32167
760.5	-0.77409	2.31938	1.04184	8.21254	9.71178	7.94197
761.5	-0.69011	2.26625	1.31256	8.30942	9.85474	8.24901
762.5	-0.85143	2.52838	1.28484	8.41411	9.93834	8.2666
763.5	-0.86784	2.66235	1.27895	8.46722	9.95512	8.33064
764.5	-1.02292	2.37563	1.5063	8.30043	9.76569	8.01854
765.5	-0.80222	2.69751	1.8317	8.47035	9.78014	8.24744
766.5	-0.41707	2.89125	1.70825	8.63049	9.89537	8.3412
767.5	-0.47879	2.61586	1.7352	8.7766	9.66138	8.27127
768.5	-0.69128	2.18813	1.48129	8.7473	9.57193	7.91737
769.5	-0.82723	2.36781	1.84419	8.66019	9.6899	8.26073
770.5	-0.87801	2.4733	1.62817	8.70746	9.71489	8.37167
771.5	-0.78737	2.29518	1.2899	8.5981	9.60475	8.18535
772.5	-1.03073	1.9733	1.66257	8.88208	9.70982	8.13066
773.5	-0.61356	2.3143	1.93951	9.1434	9.98248	8.53651
774.5	-0.63777	2.30336	1.93599	8.83012	9.92975	8.4287
775.5	-0.57723	2.01469	1.72661	8.86682	9.91528	8.29393
776.5	-0.55457	2.17055	1.75668	8.82933	9.96138	8.34511
777.5	-0.70885	2.29634	1.68756	8.69185	9.89342	8.31192
778.5	-0.50028	2.10414	1.76451	8.47073	9.74068	8.17361
779.5	-0.44362	2.26392	1.83989	8.67661	10.0434	8.55721
780.5	-0.56549	1.83736	1.50279	8.54652	9.98209	8.64394
781.5	-0.61551	1.89243	1.48637	8.81877	10.1309	8.63182
782.5	-0.62878	2.29712	1.54379	8.94377	10.1786	8.82516
783.5	-0.79012	2.03383	1.32623	8.69339	9.98952	8.93924
784.5	-0.51393	1.94791	1.79889	8.72543	10.3606	8.8877
785.5	-0.22136	2.24048	1.88989	8.85667	10.577	9.31346
786.5	-0.34636	2.20219	1.50827	8.73482	10.6505	9.24902
787.5	-0.35417	1.98579	1.43678	8.60629	10.4364	8.93729
788.5	-0.07057	2.17993	1.82233	8.93715	10.6653	9.0994
789.5	-0.55026	1.77408	1.51764	8.45317	10.4208	8.81621
790.5	-0.41121	2.00064	1.47037	9.05043	10.5911	8.72714
791.5	-0.46199	2.1104	1.48169	8.99379	10.4258	8.61971
792.5	-0.33698	2.31587	1.83678	9.16801	10.6192	9.01581
793.5	-0.36589	2.47095	1.84457	9.13246	10.677	8.83885
794.5	-0.35925	2.3725	1.8102	8.96487	10.5255	8.4494
795.5	-0.58542	2.15807	1.73405	8.74731	10.2817	8.75995
796.5
797.5

## Sheet: 3F
C0802-G12D10mer	Experiment
[TCR10] mM	1	2	3	4
1.25	17.1	32	5.13373	34.6737	Response units
2.5	28.3	54.2	16.5944	44.5437
5	46	92.3	28.0647	57.3719
10	65.2	129	50.8129	69.9897
20			77.4193	89.3211
40			103.417	115.801
80				146.441
C0501-G12D10mer	Experiment
[TCR10] mM	1	2	3	4
1.25	11.2	18.2	5.13373	34.6737	Response units
2.5	20.9	30.2	16.5944	44.5437
5	35.1	52.5	28.0647	57.3719
10	53.8	71.8	50.8129	69.9897
20			77.4193	89.3211
40			103.417	115.801
80				146.441

## Sheet: 3G
TCR10	Response units
Time (s)	C*05-G12D-10mer	C*08-G12D-10mer
1.5	0.002419	-0.00186
2.5	0.004948	0.000512
3.5	0.003224	0.000413
4.5	0.003199	-0.00189
5.5	0.001728	0.001419
6.5	0.002773	0.000841
7.5	0.002108	0.000167
8.5	0.002579	0.000664
9.5	0.001655	-0.0003
10.5	0.001802	0.002227
11.5	0.002417	-0.00151
12.5	0.001068	-0.00039
13.5	0.001657	-0.00171
14.5	0.001957	-0.00166
15.5	-0.00057	-0.00239
16.5	0.00081	-0.00156
17.5	0.002387	-8.7e-05
18.5	0.003469	-0.00051
19.5	0.001514	-0.00088
20.5	0.002476	0.000239
21.5	0.003306	0.00152
22.5	0.002412	0.001788
23.5	0.001749	0.000899
24.5	-0.00053	-0.00127
25.5	-0.00192	-0.00185
26.5	-0.00207	-0.00228
27.5	-0.0014	-0.00267
28.5	0.001339	0.000247
29.5	0.001636	-0.00069
30.5	0.000598	-0.00163
31.5	-0.00067	-0.00133
32.5	-0.00166	-0.00064
33.5	-0.00052	-0.00135
34.5	-0.00037	0.000361
35.5	-0.00126	0.001537
36.5	0.000351	0.00076
37.5	0.002733	0.001578
38.5	-0.00036	0.002072
39.5	0.001612	0.000687
40.5	0.000922	0.001203
41.5	0.000627	0.002147
42.5	0.000277	0.000818
43.5	0.00013	0.000753
44.5	-0.00132	0.00067
45.5	-0.00151	-0.00094
46.5	0.000153	-2.4e-06
47.5	-0.00324	0.000708
48.5	-0.00318	0.000564
49.5	-0.00246	-0.00041
50.5	-0.00141	0.000626
51.5	-0.00139	-0.00016
52.5	-4.8e-05	-0.00054
53.5	-0.00054	-0.00026
54.5	-0.00055	0.000172
55.5	0.000149	0.000391
56.5	-0.00198	-0.00041
57.5	-0.00292	-0.00103
58.5	-0.00306	-0.00313
59.5	-0.00268	-0.00108
60.5	-0.00088	-0.00127
61.5	-0.00355	-0.00221
62.5	-0.00345	-0.00039
63.5	-0.00409	-0.00158
64.5	-0.00455	-0.00126
65.5	-0.00223	-0.00262
66.5	0.18668	0.367812
67.5	0.383321	0.711901
68.5	0.441144	0.819496
69.5	0.472405	0.841443
70.5	0.497585	0.847779
71.5	0.515338	0.849383
72.5	0.531161	0.848686
73.5	0.543805	0.845669
74.5	0.555159	0.844314
75.5	0.564759	0.842204
76.5	0.571017	0.839128
77.5	0.580805	0.83557
78.5	0.587748	0.834664
79.5	0.593567	0.832519
80.5	0.600242	0.829098
81.5	0.605365	0.829127
82.5	0.610182	0.828001
83.5	0.617623	0.826286
84.5	0.623993	0.828104
85.5	0.630814	0.826622
86.5	0.632988	0.825097
87.5	0.634398	0.822582
88.5	0.635605	0.819838
89.5	0.639106	0.818853
90.5	0.641792	0.818141
91.5	0.643644	0.817084
92.5	0.648169	0.815997
93.5	0.650937	0.816621
94.5	0.651189	0.814905
95.5	0.654754	0.814038
96.5	0.656075	0.813287
97.5	0.658331	0.810416
98.5	0.662401	0.810533
99.5	0.663538	0.810509
100.5	0.666205	0.809924
101.5	0.66783	0.811186
102.5	0.667589	0.809383
103.5	0.667172	0.806171
104.5	0.669928	0.807585
105.5	0.67451	0.805747
106.5	0.669713	0.805338
107.5	0.665131	0.800103
108.5	0.665453	0.797067
109.5	0.664429	0.794742
110.5	0.664448	0.793241
111.5	0.664815	0.79152
112.5	0.664556	0.791248
113.5	0.665889	0.7898
114.5	0.667109	0.790034
115.5	0.667248	0.792208
116.5	0.667134	0.789342
117.5	0.66812	0.790677
118.5	0.665719	0.789493
119.5	0.665674	0.787046
120.5	0.665561	0.786315
121.5	0.665479	0.784619
122.5	0.664878	0.784658
123.5	0.664903	0.785682
124.5	0.664499	0.785979
125.5	0.665453	0.785145
126.5	0.666256	0.783912
127.5	0.665156	0.785019
128.5	0.663658	0.783937
129.5	0.662426	0.784775
130.5	0.661965	0.78382
131.5	0.662603	0.783147
132.5	0.660638	0.782709
133.5	0.661409	0.779009
134.5	0.666148	0.782606
135.5	0.67006	0.788811
136.5	0.668221	0.787982
137.5	0.671027	0.785365
138.5	0.670162	0.78827
139.5	0.670376	0.786729
140.5	0.665403	0.78535
141.5	0.665611	0.783576
142.5	0.666553	0.783386
143.5	0.667476	0.784254
144.5	0.66673	0.786379
145.5	0.666989	0.785184
146.5	0.665902	0.785311
147.5	0.664714	0.784322
148.5	0.663753	0.783113
149.5	0.662951	0.7817
150.5	0.662186	0.782265
151.5	0.66127	0.781758
152.5	0.663267	0.783376
153.5	0.660593	0.782694
154.5	0.659987	0.782947
155.5	0.65835	0.782138
156.5	0.656991	0.780408
157.5	0.657667	0.779945
158.5	0.658293	0.779974
159.5	0.658805	0.780179
160.5	0.656384	0.778585
161.5	0.657781	0.779653
162.5	0.656574	0.779409
163.5	0.657332	0.776275
164.5	0.659203	0.779258
165.5	0.658318	0.778288
166.5	0.660043	0.780335
167.5	0.660423	0.780822
168.5	0.660833	0.779994
169.5	0.658419	0.781202
170.5	0.658343	0.780038
171.5	0.658552	0.780891
172.5	0.658204	0.780281
173.5	0.658609	0.781076
174.5	0.656928	0.781173
175.5	0.656024	0.781934
176.5	0.657181	0.780842
177.5	0.653755	0.778961
178.5	0.652921	0.778322
179.5	0.653193	0.778103
180.5	0.653578	0.777152
181.5	0.65397	0.778215
182.5	0.655044	0.77977
183.5	0.653193	0.779058
184.5	0.650096	0.777562
185.5	1	1
186.5	-0.10731	0.082672
187.5	0.077877	0.045801
188.5	0.033216	-0.08573
189.5	0.018559	-0.13832
190.5	0.020603	-0.15624
191.5	0.033348	-0.16097
192.5	0.045071	-0.15624
193.5	0.053169	-0.15019
194.5	0.059193	-0.14225
195.5	0.066866	-0.13479
196.5	0.070455	-0.12865
197.5	0.075138	-0.12409
198.5	0.07555	-0.12021
199.5	0.076169	-0.11746
200.5	0.076754	-0.11589
201.5	0.075581	-0.1151
202.5	0.075911	-0.11378
203.5	0.075109	-0.11182
204.5	0.076612	-0.11225
205.5	0.077312	-0.11
206.5	0.078783	-0.11139
207.5	0.078168	-0.11053
208.5	0.079072	-0.10884
209.5	0.078464	-0.1103
210.5	0.075818	-0.10938
211.5	0.077014	-0.10926
212.5	0.075056	-0.11361
213.5	0.073052	-0.10519
214.5	0.074125	-0.10833
215.5	0.073043	-0.11066
216.5	0.073801	-0.11063
217.5	0.072594	-0.10958
218.5	0.072451	-0.11106
219.5	0.075031	-0.11018
220.5	0.075789	-0.10907
221.5	0.073771	-0.11342
222.5	0.076639	-0.10635
223.5	0.072551	-0.10854
224.5	0.073503	-0.11049
225.5	0.071179	-0.11254
226.5	0.072384	-0.11152
227.5	0.073105	-0.11106
228.5	0.07221	-0.11212
229.5	0.074284	-0.11042
230.5	0.073866	-0.10974
231.5	0.072657	-0.11106
232.5	0.072846	-0.11202
233.5	0.071844	-0.11116
234.5	0.071067	-0.11138
235.5	0.074614	-0.11039
236.5	0.072848	-0.10885
237.5	0.072233	-0.10941
238.5	0.072041	-0.10907
239.5	0.070658	-0.10909
240.5	0.072815	-0.11096
241.5	0.07193	-0.10946
242.5	0.072416	-0.11109
243.5	0.072968	-0.11139
244.5	0.071701	-0.11067
245.5	0.071168	-0.11122
246.5	0.07185	-0.11133
247.5	0.072859	-0.10926
248.5	0.069409	-0.10909
249.5	0.068254	-0.11083
250.5	0.070323	-0.11107
251.5	0.068744	-0.11088
252.5	0.069276	-0.11045
253.5	0.070665	-0.11082
254.5	0.069692	-0.10994
255.5	0.070383	-0.11095
256.5	0.068462	-0.11123
257.5	0.06897	-0.10968
258.5	0.068401	-0.10912
259.5	0.066698	-0.10975
260.5	0.066911	-0.11003
261.5	0.066341	-0.1098
262.5	0.06569	-0.10879
263.5	0.066489	-0.10947
264.5	0.065611	-0.11087
265.5	0.064301	-0.11034
266.5	0.065017	-0.11083
267.5	0.065561	-0.11048
268.5	0.064928	-0.11194
269.5	0.063787	-0.11129
270.5	0.061434	-0.11159
271.5	0.061524	-0.11206
272.5	0.064654	-0.11124
273.5	0.064809	-0.11176
274.5	0.065371	-0.11032
275.5	0.064963	-0.10977
276.5	0.065349	-0.10968
277.5	0.064406	-0.10924
278.5	0.065582	-0.11031
279.5	0.064926	-0.11013
280.5	0.064447	-0.11133
281.5	0.062814	-0.11128
282.5	0.063366	-0.11125
283.5	0.065456	-0.10944
284.5	0.066208	-0.10943
285.5	0.067606	-0.10846
286.5	0.067159	-0.10811
287.5	0.063514	-0.10905
288.5	0.061873	-0.11223
289.5	0.064744	-0.11197
290.5	0.062679	-0.11076
291.5	0.063614	-0.11209
292.5	0.065922	-0.11083
293.5	0.063796	-0.11289
294.5	0.062138	-0.11325
295.5	0.061311	-0.11242
296.5	0.06373	-0.11143
297.5	0.066616	-0.11154
298.5	0.065051	-0.1123
299.5	0.064138	-0.11221
300.5	0.061094	-0.11095
301.5	0.062012	-0.11051
302.5	0.062051	-0.11095
303.5	0.063726	-0.11112
304.5	0.065631	-0.10898
305.5	0.065146	-0.10974
306.5	0.066437	-0.10812
307.5	0.06553	-0.10701
308.5	0.066126	-0.10867
309.5	0.063978	-0.10849
310.5	0.06372	-0.10886
311.5	0.064309	-0.1083
312.5	0.062882	-0.10728
313.5	0.063866	-0.1072
314.5	0.062521	-0.10802
315.5	0.06326	-0.10809
316.5	0.062904	-0.10665
317.5	0.062808	-0.10755
318.5	0.059459	-0.10775
319.5	0.062193	-0.10874
320.5	0.063918	-0.10722
321.5	0.063533	-0.10617
322.5	0.065764	-0.10688
323.5	0.064993	-0.10514
324.5	0.06476	-0.10592
325.5	0.064033	-0.10461
326.5	0.064443	-0.10688
327.5	0.062809	-0.10734
328.5	0.061816	-0.10666
329.5	0.06099	-0.10528
330.5	0.06225	-0.10614
331.5	0.062957	-0.10529
332.5	0.061084	-0.1052
333.5	0.059985	-0.10722
334.5	0.059782	-0.10784
335.5	0.057116	-0.1089
336.5	0.05939	-0.10773
337.5	0.059873	-0.10614
338.5	0.059509	-0.1072
339.5	0.06152	-0.10626
340.5	0.061394	-0.10724
341.5	0.061867	-0.10642
342.5	0.061558	-0.10677
343.5	0.062031	-0.10542
344.5	0.060703	-0.10539
345.5	0.060463	-0.10681
346.5	0.062565	-0.10474
347.5	0.062643	-0.10496
348.5	0.060896	-0.10428
349.5	0.060478	-0.10762
350.5	0.062122	-0.10717
351.5	0.061867	-0.10654
352.5	0.05934	-0.10655
353.5	0.059284	-0.10791
354.5	0.057424	-0.10807
355.5	0.059545	-0.10833
356.5	0.061257	-0.1071
357.5	0.061398	-0.10624
358.5	0.06069	-0.10683
359.5	0.061544	-0.10843
360.5	0.061094	-0.10739
361.5	0.06114	-0.10743
362.5	0.061205	-0.10658
363.5	0.06122	-0.10762
364.5	0.060387	-0.10571
365.5	0.059635	-0.10699
366.5	0.057985	-0.10762
367.5	0.058664	-0.10848
368.5	0.063329	-0.10728
369.5	0.059618	-0.10622
370.5	0.058059	-0.10837
371.5	0.057137	-0.10846
372.5	0.059397	-0.10705
373.5	0.059671	-0.10859
374.5	0.059401	-0.10775
375.5	0.060352	-0.10754
376.5	0.06062	-0.10555
377.5	0.061838	-0.10574
378.5	0.062418	-0.10471
379.5	0.063489	-0.10491
380.5	0.060475	-0.10626
381.5	0.060323	-0.10682
382.5	0.061634	-0.10735
383.5	0.060236	-0.10668
384.5	0.060466	-0.1052
385.5	0.060656	-0.10448
386.5	0.058779	-0.10386
387.5	0.061221	-0.10382
388.5	0.061026	-0.10397
389.5	0.059639	-0.10508
390.5	0.059028	-0.10656
391.5	0.059957	-0.10704
392.5	0.060612	-0.10551
393.5	0.062039	-0.10479
394.5	0.059372	-0.10565
395.5	0.059913	-0.10604
396.5	0.061081	-0.10627
397.5	0.059397	-0.10768
398.5	0.060209	-0.10699
399.5	0.06104	-0.10706
400.5	0.060215	-0.10656
401.5	0.059857	-0.10597
402.5	0.061173	-0.10562
403.5	0.061796	-0.10647
404.5	0.059996	-0.10557
405.5	0.059743	-0.10513
406.5	0.061198	-0.10407
407.5	0.063497	-0.10293
408.5	0.061748	-0.10351
409.5	0.063635	-0.10343
410.5	0.064181	-0.10156
411.5	0.062056	-0.10309
412.5	0.060704	-0.1026
413.5	0.060757	-0.10359
414.5	0.060511	-0.10438
415.5	0.061962	-0.10414
416.5	0.064316	-0.10213
417.5	0.063385	-0.10136
418.5	0.062981	-0.10121
419.5	0.061915	-0.10208
420.5	0.062214	-0.10106
421.5	0.063308	-0.10072
422.5	0.062166	-0.10117
423.5	0.062967	-0.10122
424.5	0.064071	-0.09952
425.5	0.062581	-0.10039
426.5	0.065197	-0.09983
427.5	0.064425	-0.10039
428.5	0.064033	-0.10139
429.5	0.06399	-0.09974
430.5	0.063682	-0.0998
431.5	0.061615	-0.10197
432.5	0.061028	-0.10359
433.5	0.060791	-0.10517
434.5	0.062035	-0.10289
435.5	0.062539	-0.10115
436.5	0.063277	-0.10183
437.5	0.063178	-0.09958
438.5	0.063499	-0.09967
439.5	0.061676	-0.10034
440.5	0.060022	-0.10121
441.5	0.059988	-0.10036
442.5	0.063882	-0.09915
443.5	0.063404	-0.0974
444.5	0.064127	-0.0988
445.5	0.06213	-0.09971
446.5	0.062235	-0.09932
447.5	0.06272	-0.09891
448.5	0.061855	-0.10004
449.5	0.062052	-0.10018
450.5	0.061475	-0.09989
451.5	0.062577	-0.09897
452.5	0.061923	-0.0989
453.5	0.063297	-0.09934
454.5	0.063005	-0.09992
455.5	0.062847	-0.09987
456.5	0.060256	-0.10008
457.5	0.059394	-0.10116
458.5	0.058613	-0.10195
459.5	0.062262	-0.10027
460.5	0.063176	-0.09856
461.5	0.062521	-0.09921
462.5	0.060463	-0.09979
463.5	0.058156	-0.10142
464.5	0.059742	-0.10138
465.5	0.060841	-0.10165
466.5	0.062772	-0.10107
467.5	0.062357	-0.10056
468.5	0.059428	-0.10174
469.5	0.061336	-0.10155
470.5	0.060541	-0.10015
471.5	0.058958	-0.10182
472.5	0.060969	-0.102
473.5	0.059375	-0.10238
474.5	0.06079	-0.10155
475.5	0.062204	-0.10118
476.5	0.062657	-0.10155
477.5	0.059695	-0.1022
478.5	0.057655	-0.10395
479.5	0.058587	-0.10371
480.5	0.058504	-0.1034
481.5	0.058471	-0.10289
482.5	0.060215	-0.10067
483.5	0.061648	-0.10126
484.5	0.060552	-0.10139
485.5	0.060108	-0.10184
486.5	0.059524	-0.10291
487.5	0.060284	-0.10278
488.5	0.058294	-0.10093
489.5	0.05586	-0.10458
490.5	0.056159	-0.10652
491.5	0.057378	-0.10536
492.5	0.056806	-0.10443
493.5	0.056445	-0.10597
494.5	0.054164	-0.10618
495.5	0.056798	-0.10583
496.5	0.055048	-0.10382
497.5	0.054609	-0.10624
498.5	0.054791	-0.1066
499.5	0.056067	-0.10586
500.5	0.057023	-0.10632
501.5	0.057082	-0.10528
502.5	0.055941	-0.10609
503.5	0.052735	-0.10652
504.5	0.053085	-0.10663
505.5	0.054293	-0.10642
506.5	0.056919	-0.10591
507.5	0.057225	-0.1055
508.5	0.054055	-0.10509
509.5	0.052797	-0.10429
510.5	0.052843	-0.10549
511.5	0.050197	-0.10636
512.5	0.051918	-0.10627
513.5	0.051352	-0.1066
514.5	0.051678	-0.10609
515.5	0.051587	-0.10491
516.5	0.05135	-0.10468
517.5	0.052076	-0.10463
518.5	0.054969	-0.10199
519.5	0.052636	-0.10269
520.5	0.055436	-0.10301
521.5	0.054715	-0.10243
522.5	0.052258	-0.10256
523.5	0.053848	-0.10232
524.5	0.055055	-0.10116
525.5	0.051861	-0.10263
526.5	0.054372	-0.10347
527.5	0.053251	-0.10176
528.5	0.054105	-0.10279
529.5	0.054927	-0.10187
530.5	0.052216	-0.10374
531.5	0.053747	-0.10413
532.5	0.053799	-0.10286
533.5	0.053443	-0.10008
534.5	0.052078	-0.09923
535.5	0.053001	-0.10174
536.5	0.052927	-0.10216
537.5	0.0533	-0.1021
538.5	0.05055	-0.10246
539.5	0.05406	-0.10173
540.5	0.053947	-0.1028
541.5	0.053122	-0.10316
542.5	0.052959	-0.1018
543.5	0.051414	-0.10264
544.5	0.053075	-0.1033
545.5	0.052604	-0.10149
546.5	0.053648	-0.10222
547.5	0.054932	-0.10267
548.5	0.055403	-0.10391
549.5	0.054707	-0.10452
550.5	0.05472	-0.10303
551.5	0.053209	-0.10464
552.5	0.055245	-0.10496
553.5	0.055949	-0.10351
554.5	0.054334	-0.10427
555.5	0.054329	-0.1036
556.5	0.053944	-0.10428
557.5	0.054063	-0.1044
558.5	0.053246	-0.10354
559.5	0.052115	-0.10377
560.5	0.054273	-0.10203
561.5	0.055492	-0.10093
562.5	0.054078	-0.10064
563.5	0.054749	-0.10166
564.5	0.054399	-0.10241
565.5	0.05408	-0.10232
566.5	0.054374	-0.10291
567.5	0.053115	-0.10246
568.5	0.05391	-0.10275
569.5	0.053367	-0.10124
570.5	0.054843	-0.10076
571.5	0.050478	-0.10326
572.5	0.051199	-0.10314
573.5	0.05268	-0.10244
574.5	0.050881	-0.10345
575.5	0.050982	-0.10264
576.5	0.050202	-0.10185
577.5	0.053989	-0.10031
578.5	0.053431	-0.10141
579.5	0.052698	-0.10311
580.5	0.054601	-0.10205
581.5	0.055399	-0.10141
582.5	0.053661	-0.10049
583.5	0.053051	-0.10038
584.5	0.054117	-0.1019
585.5	0.050207	-0.10251
586.5	0.051458	-0.10204
587.5	0.05031	-0.1039
588.5	0.052379	-0.10175
589.5	0.051579	-0.10332
590.5	0.053641	-0.10225
591.5	0.054539	-0.10237
592.5	0.052202	-0.10063
593.5	0.053293	-0.10023
594.5	0.052562	-0.10205
595.5	0.052066	-0.10417
596.5	0.0521	-0.10201
597.5	0.052802	-0.10045
598.5	0.053386	-0.10092
599.5	0.054665	-0.09956
600.5	0.054406	-0.09869
601.5	0.055403	-0.09843
602.5	0.05368	-0.09735
603.5	0.053122	-0.0995
604.5	0.052312	-0.09878
605.5	0.052599	-0.09572
606.5	0.042332	-0.11726
607.5	0.063012	-0.09986
608.5	0.066683	-0.08875
609.5	0.05666	-0.09432
610.5	0.052263	-0.09834
611.5	0.050372	-0.10283
612.5	0.048916	-0.10528
613.5	0.049644	-0.10519
614.5	0.050049	-0.10261
615.5	0.053678	-0.09875
616.5	0.055665	-0.09456
617.5	0.05449	-0.09653
618.5	0.055369	-0.09435
619.5	0.054112	-0.09543
620.5	0.050231	-0.09635
621.5	0.049809	-0.09916
622.5	0.048027	-0.10148
623.5	0.050417	-0.10155
624.5	0.052362	-0.10191
625.5	0.054626	-0.10049
626.5	0.054845	-0.0999
627.5	0.055085	-0.09953
628.5	0.053268	-0.09976
629.5	0.052881	-0.10225
630.5	0.056132	-0.10007
631.5	0.057243	-0.09857
632.5	0.057287	-0.09715
633.5	0.055848	-0.09843
634.5	0.05569	-0.09735
635.5	0.056781	-0.09736
636.5	0.056586	-0.09825
637.5	0.055621	-0.1004
638.5	0.056171	-0.09951
639.5	0.056472	-0.10041
640.5	0.05662	-0.10038
641.5	0.056188	-0.09941
642.5	0.057322	-0.09859
643.5	0.055751	-0.09938
644.5	0.056028	-0.0987
645.5	0.05509	-0.09712
646.5	0.054828	-0.0988
647.5	0.054947	-0.09738
648.5	0.054492	-0.09832
649.5	0.05427	-0.09765
650.5	0.055129	-0.09965
651.5	0.056403	-0.09856
652.5	0.056085	-0.09814
653.5	0.055594	-0.09865
654.5	0.056477	-0.09718
655.5	0.058546	-0.09593
656.5	0.057201	-0.0958
657.5	0.055273	-0.09705
658.5	0.057383	-0.0979
659.5	0.054697	-0.09843
660.5	0.05471	-0.1005
661.5	0.055981	-0.09834
662.5	0.05469	-0.0994
663.5	0.054947	-0.09876
664.5	0.053224	-0.09889
665.5	0.054337	-0.09853
666.5	0.054547	-0.09908
667.5	0.054376	-0.09852
668.5	0.056137	-0.09624
669.5	0.0529	-0.09768
670.5	0.052893	-0.1004
671.5	0.053382	-0.09992
672.5	0.052172	-0.0996
673.5	0.053722	-0.09859
674.5	0.051839	-0.09865
675.5	0.053362	-0.09886
676.5	0.0539	-0.0993
677.5	0.052831	-0.09914
678.5	0.054707	-0.09973
679.5	0.054171	-0.09989
680.5	0.057516	-0.09927
681.5	0.056218	-0.0969
682.5	0.058242	-0.09684
683.5	0.056132	-0.09578
684.5	0.056043	-0.09614
685.5	0.055756	-0.09742
686.5	0.055838	-0.09626
687.5	0.055324	-0.09871
688.5	0.054626	-0.09974
689.5	0.056766	-0.09827
690.5	0.054843	-0.09701
691.5	0.055574	-0.10088
692.5	0.057892	-0.10043
693.5	0.055566	-0.1004
694.5	0.055914	-0.10028
695.5	0.056198	-0.09989
696.5	0.055196	-0.09991
697.5	0.056529	-0.09912
698.5	0.056751	-0.09865
699.5	0.05746	-0.09827
700.5	0.056685	-0.0979
701.5	0.056072	-0.09713
702.5	0.056003	-0.09744
703.5	0.05432	-0.09867
704.5	0.054606	-0.09735
705.5	0.053391	-0.09796
706.5	0.052446	-0.10054
707.5	0.053058	-0.09748
708.5	0.052663	-0.0994
709.5	0.052031	-0.09883
710.5	0.053246	-0.09887
711.5	0.049782	-0.10088
712.5	0.050787	-0.10011
713.5	0.054218	-0.10027
714.5	0.05452	-0.09851
715.5	0.052377	-0.0988
716.5	0.05288	-0.09907
717.5	0.0535	-0.09877
718.5	0.054808	-0.09759
719.5	0.053535	-0.09683
720.5	0.055492	-0.0944
721.5	0.053394	-0.09688
722.5	0.053251	-0.09701
723.5	0.053811	-0.09543
724.5	0.051291	-0.09663
725.5	0.050824	-0.09654
726.5	0.053066	-0.09691
727.5	0.053265	-0.09642
728.5	0.053441	-0.09652
729.5	0.052762	-0.09654
730.5	0.054381	-0.0962
731.5	0.053429	-0.09524
732.5	0.053806	-0.0954
733.5	0.053868	-0.09632
734.5	0.055156	-0.09709
735.5	0.053419	-0.0955
736.5	0.052431	-0.09656
737.5	0.052224	-0.09654
738.5	0.053293	-0.09781
739.5	0.051518	-0.09767
740.5	0.05096	-0.09793
741.5	0.049765	-0.09901
742.5	0.051515	-0.0981
743.5	0.054236	-0.09567
744.5	0.052263	-0.09502
745.5	0.051108	-0.09616
746.5	0.052478	-0.09611
747.5	0.05347	-0.09678
748.5	0.053589	-0.09637
749.5	0.052105	-0.09771
750.5	0.052209	-0.09767
751.5	0.051491	-0.09745
752.5	0.053248	-0.09698
753.5	0.054213	-0.09834
754.5	0.053169	-0.09682
755.5	0.052073	-0.09691
756.5	0.054463	-0.09652
757.5	0.052836	-0.09641
758.5	0.052132	-0.09575
759.5	0.052592	-0.095
760.5	0.050192	-0.09616
761.5	0.052132	-0.097
762.5	0.052244	-0.09643
763.5	0.052648	-0.09515
764.5	0.050676	-0.09256
765.5	0.052122	-0.09485
766.5	0.052715	-0.09482
767.5	0.052273	-0.09345
768.5	0.050036	-0.09433
769.5	0.052206	-0.09412
770.5	0.052908	-0.09365
771.5	0.05173	-0.09399
772.5	0.051384	-0.09594
773.5	0.053949	-0.09461
774.5	0.053268	-0.09484
775.5	0.052416	-0.09615
776.5	0.05274	-0.09535
777.5	0.05253	-0.09525
778.5	0.051656	-0.09536
779.5	0.05408	-0.09488
780.5	0.054628	-0.09469
781.5	0.054552	-0.09374
782.5	0.055774	-0.09227
783.5	0.056495	-0.09115
784.5	0.056169	-0.0913
785.5	0.05886	-0.09093
786.5	0.058452	-0.09164
787.5	0.056482	-0.09218
788.5	0.057507	-0.09195
789.5	0.055717	-0.09231
790.5	0.055154	-0.09158
791.5	0.054475	-0.09308
792.5	0.056978	-0.09283
793.5	0.05586	-0.09206
794.5	0.053399	-0.09385
795.5	0.055361	-0.09449
796.5	0	0
797.5	0	0
