# Supplementary material for: T cells discriminate between groups C1 and C2 HLA-C
Source: eLife. 2022 May 19;11:e75670. doi: 10.7554/eLife.75670 (PMC9177145; doi:10.7554/eLife.75670)
Supplement: Figure 5—source data 1. — Raw angles for 5J. ELISA readings for 5K. [file elife-75670-fig5-data1.xlsx]

## Sheet: 5E
p77 to p8 (Å)	C1	C2
	4.7	5.7
	4.5	5.9
	4.5	5.8
	4.7	5.5
	4.78	5.3
		5.8
		5.7

## Sheet: 5G
Y171 - peptide N (Å)	C1	C2
	2.8	2.8
	2.7	2.7
	2.8	2.6
	2.5	2.8
	2.57	2.7
		2.97
		2.75

## Sheet: 5I
p8 to val 76 (Å)	C1	C2
	3.6	4.7
	3.5	5.9
	3.5	4.4
	3.9	6
	4	4
		6
		5.7

## Sheet: 5J
Torsion angle terminal peptide bond (°)	C1	C2
	-70	-104
	-66.7	-94
	-76	-68
	-60	-88
	-75.2	-84
		-94.2
		-79.5

## Sheet: 5K
	Jurkat TCR9a IL-2 OD450
GADGVGKSA (G12D9mer)	C*08:02				C*05:01				C*05:01-N77S				C*05:01-K80N				C08-WT				C*05:01-WT				C*05:01-N77S-WT				C*05:01-K80N-WT
100	0.279	0.53	0.631	1.061	0.111	0.333	0.412	0.681	1.041	0.454	0.473	1.198	1.361	0.34	0.376	1.193	0.107	0.153	0.128	0.091	0.066	0.048	0.052	0.212	0.16	0.117	0.112	0.351	0.423	0.136	0.231	0.458
10	0.563	1.153	1.334	1.479	0.056	0.058	0.062	0.114	1.514	1.043	1.205	1.1	0.179	0.287	0.184	0.175
1	0.55	1.199	1.392	1.426	0.051	0.061	0.056	0.109	0.672	0.962	0.772	0.584	0.088	0.081	0.055	0.147
0.1	0.419	1.1	1.336	1.299	0.053	0.051	0.065	0.105	0.241	0.568	0.102	0.313	0.075	0.053	0.052	0.138
0.01	0.093	0.827	0.77	0.925	0.054	0.053	0.055	0.1	0.071	0.115	0.056	0.148	0.078	0.052	0.055	0.125
0.001	0.052	0.1	0.067	0.186	0.054	0.051	0.06	0.134	0.068	0.061	0.054	0.139	0.077	0.053	0.052	0.124
0.0001	0	0	0	0.114	0	0	0	0.099	0	0	0	0.134	0	0	0	0.118
	Jurkat TCR10 IL-2 OD450
GADGVGKSAL (G12D10mer	C*08:02			C*05:01			C*05:01-N77S			C*05:01-K80N			C08-WT			C*05:01-WT			C*05:01-N77S-WT			C*05:01-K80N-WT
100	2.041	1.111	0.382	1.025	0.617	0.177	0.649	0.444	0.149	0.946	0.406	0.111	0.071	0.051	0.061	0.057	0.043	0.045	0.054	0.044	0.044	0.05	0.043	0.041
10	2.66	1.2	1.227	0.19	0.135	0.138	0.123	0.091	0.1	0.434	0.189	0.227
1	2.416	1.154	1.187	0.077	0.055	0.091	0.071	0.049	0.061	0.108	0.086	0.1
0.1	1.798	0.802	0.761	0.06	0.046	0.047	0.164	0.045	0.057	0.097	0.058	0.055
0.01	0.629	0.19	0.222	0.074	0.044	0.06	0.057	0.045	0.046	0.057	0.046	0.046
0.001	0.283	0.052	0.07	0.069	0.045	0.055	0.057	0.046	0.049	0.051	0.044	0.045
