# Supplementary material for: T cells discriminate between groups C1 and C2 HLA-C
Source: eLife. 2022 May 19;11:e75670. doi: 10.7554/eLife.75670 (PMC9177145; doi:10.7554/eLife.75670)
Supplement: Figure 6—source data 1. [file elife-75670-fig6-data1.xlsx]

## Sheet: 6A
	Position	Residue frequency (%)
	P2	C*05:01	C*08:02
Amino Acid	A	26.3661	24.421
	C	0.136612	0.956697
	D	0.546448	0.20141
	E	0.136612	0.100705
	F	1.22951	1.71198
	G	6.42077	6.09265
	H	0.273224	0
	I	9.83607	7.95569
	K	0.68306	0.453172
	L	8.19672	10.2216
	M	0.819672	1.66163
	N	1.50273	2.61833
	P	1.50273	0.553877
	Q	7.24044	6.59617
	R	0.136612	0
	S	13.388	16.7674
	T	9.97268	7.85499
	V	10.7924	10.5237
	W	0	0.704935
	Y	0.819672	0.60423
	P7	C*05:01	C*08:02
Amino Acid	A	9.01639	7.2004
	C	0.546448	0.755287
	D	0.68306	1.61128
	E	4.64481	7.90534
	F	2.86885	2.21551
	G	0.819672	2.46727
	H	3.55191	4.53172
	I	9.01639	4.78348
	K	1.63934	7.70393
	L	3.96175	10.9265
	M	0.956284	2.0141
	N	2.86885	6.74723
	P	7.24044	3.22256
	Q	2.18579	6.84794
	R	3.96175	6.49547
	S	8.87978	8.30816
	T	12.4317	6.69688
	V	19.9454	7.80463
	W	0.546448	0.553877
	Y	4.23497	1.20846
	P8	C*05:01	C*08:02
Amino Acid	A	1.36612	16.8177
	C	0.546448	1.61128
	D	0.956284	4.1289
	E	9.15301	14.0987
	F	5.46448	2.31621
	G	1.91257	1.71198
	H	4.64481	2.41692
	I	3.14208	2.06445
	K	15.3005	2.61833
	L	13.5246	2.41692
	M	1.36612	1.00705
	N	2.04918	3.02115
	P	0.409836	3.02115
	Q	7.24044	3.77644
	R	12.7049	1.51057
	S	3.82514	15.9114
	T	4.78142	8.91239
	V	6.14754	10.9265
	W	0.956284	0.352467
	Y	4.5082	1.35952

## Sheet: 6B
		Fold change	-Log10(P)
Amino Acid	A	-1.82506	3.80066
	C	-0.357421	0.456617
	D	-0.179097	0.305062
	E	-0.435911	1.89971
	F	1.39337	3.87398
	G	-0.112583	0.114337
	H	0.606961	1.29483
	I	-0.434157	0.785991
	K	1.51506	4.86284
	L	1.74811	3.53963
	M	1.05414	3.15362
	N	0.438053	1.62777
	P	-3.18837	4.67682
	Q	0.302554	1.0117
	R	1.72946	4.43658
	S	-1.24217	4.98357
	T	-0.573309	2.14731
	V	-0.773844	3.19088
	W	2.1133	1.62444
	Y	1.31602	2.71064

## Sheet: 6C
		Fold change	Amino acid volume
Amino Acid	A	-1.82506	88.6
	C	-0.357421	108.5
	D	-0.179097	111.1
	E	-0.435911	138.4
	F	1.39337	189.9
	G	-0.112583	60.1
	H	0.606961	153.2
	I	-0.434157	166.7
	K	1.51506	168.6
	L	1.74811	166.7
	M	1.05414	162.9
	N	0.438053	114.1
	P	-3.18837	112.7
	Q	0.302554	143.8
	R	1.72946	173.4
	S	-1.24217	89
	T	-0.573309	116.1
	V	-0.773844	140
	W	2.1133	227.8
	Y	1.31602	193.6
