# Supplementary material for: T cells discriminate between groups C1 and C2 HLA-C
Source: eLife. 2022 May 19;11:e75670. doi: 10.7554/eLife.75670 (PMC9177145; doi:10.7554/eLife.75670)
Supplement: Figure 7—source data 1. [file elife-75670-fig7-data1.xlsx]

## Sheet: 7A,B
C0802	Jurkat TCR9a IL2 (OD 450)
GADGVGKXA mM	8S		8A		8G		8E		8V		8L		8K		8R
100	1.4905	1.4765	1.5145	1.3965	1.4575	1.3725	1.4365	1.4265	1.4835	1.3735	1.3575	1.4115	1.4005	1.3675	1.3105	1.3985
10	1.4185	1.4705	1.4635	1.3695	1.3205	1.2385	1.4615	1.3955	1.3655	1.3675	1.2965	1.3235	1.2135	1.2895	0.9165	1.1055
1	1.3755	1.4075	1.4805	1.3885	1.2415	1.1225	1.4185	1.4115	1.3145	1.3385	0.7105	0.7825	0.6715	1.2075	0.1775	0.2035
0.1	1.3185	1.3775	1.3865	1.4015	0.9035	1.1605	1.3525	1.3585	1.2545	1.2865	0.1435	0.1455	0.1005	0.2225	0.0775	0.0055
0.01	1.0255	0.9015	1.0985	1.2585	0.5385	0.2355	1.2065	1.2195	0.9895	0.9035	0.0945	0.0495	0.0625	-0.0095	0.0525	0.0085
0.001	0.2125	0.0345	0.3545	1.3455	0.3325	0.0445	0.6415	0.2585	0.4085	0.0825	0.0815	0.0115	0.0535	0.0275	0.0665	0.0025

## Sheet: 7C
C0802	Jurkat TCR9a IL2 (OD 450)
GADGVGKXA mM	Ser+Ala (p8)						Gly+Glu+Val (p8)						Leu+Lys+Arg (p8)
100	1.4905	1.4765	1.5145	1.3965			1.4575	1.3725	1.4365	1.4265	1.4835	1.3735	1.3575	1.4115	1.4005	1.3675	1.3105	1.3985
10	1.4185	1.4705	1.4635	1.3695			1.3205	1.2385	1.4615	1.3955	1.3655	1.3675	1.2965	1.3235	1.2135	1.2895	0.9165	1.1055
1	1.3755	1.4075	1.4805	1.3885			1.2415	1.1225	1.4185	1.4115	1.3145	1.3385	0.7105	0.7825	0.6715	1.2075	0.1775	0.2035
0.1	1.3185	1.3775	1.3865	1.4015			0.9035	1.1605	1.3525	1.3585	1.2545	1.2865	0.1435	0.1455	0.1005	0.2225	0.0775	0.0055
0.01	1.0255	0.9015	1.0985	1.2585			0.5385	0.2355	1.2065	1.2195	0.9895	0.9035	0.0945	0.0495	0.0625	-0.0095	0.0525	0.0085
0.001	0.2125	0.0345	0.3545	1.3455			0.3325	0.0445	0.6415	0.2585	0.4085	0.0825	0.0815	0.0115	0.0535	0.0275	0.0665	0.0025

## Sheet: 7D,E
C0802	Jurkat TCR9a IL2 (OD 450)
[GADGVGKXL] mM	8S		8A		8G		8V		8E		8L		8K		8R
10	1.534	1.104	1.538	1.039	1.568	0.894	1.56	0.91	1.489	0.978	1.534	0.876	1.463	0.974	1.513	0.937
1	1.431	1.212	1.452	1.159	1.462	1.136	1.392	1.11	1.41	1.155	1.397	1.118	1.382	1.099	1.375	1.09
0.1	1.504	1.208	1.512	1.207	1.487	1.104	1.507	1.112	1.481	1.08	1.381	1.028	1.432	1.047	1.41	1.037
0.01	1.352	1.235	1.408	1.241	1.358	1.213	1.388	1.242	1.358	1.214	0.79	0.846	1.146	1.041	1.106	0.822
0.001	1.137	1.091	0.858	0.91	1.027	1.032	0.765	1.124	1.324	0.769	0.213	0.265	0.412	0.279	0.345	0.189
0.0001	0.246	0.193	0.186	0.127	0.231	0.291	0.157	0.452	0.409	0.105	0.107	0.105	0.12	0.095	0.14	0.093
1e-05	0.142	0.081	0.137	0.096	0.137	0.102	0.141	0.079	0.14	0.077	0.105	0.081	0.122	0.075	0.127	0.08
1e-06	0.146	0.083	0.14	0.09	0.141	0.076	0.121	0.083	0.144	0.102	0.132	0.089	0.119	0.079	0.189	0.08

## Sheet: 7F
C0802	Jurkat TCR9a IL2 (OD 450)
[GADGVGKXL] mM	S+A (p8)						L+K+R (p8)						G+V+E (p8)
10	1.534	1.104	1.538	1.039			1.534	0.876	1.463	0.974	1.513	0.937	1.568	0.894	1.56	0.91	1.489	0.978
1	1.431	1.212	1.452	1.159			1.397	1.118	1.382	1.099	1.375	1.09	1.462	1.136	1.392	1.11	1.41	1.155
0.1	1.504	1.208	1.512	1.207			1.381	1.028	1.432	1.047	1.41	1.037	1.487	1.104	1.507	1.112	1.481	1.08
0.01	1.352	1.235	1.408	1.241			0.79	0.846	1.146	1.041	1.106	0.822	1.358	1.213	1.388	1.242	1.358	1.214
0.001	1.137	1.091	0.858	0.91			0.213	0.265	0.412	0.279	0.345	0.189	1.027	1.032	0.765	1.124	1.324	0.769
0.0001	0.246	0.193	0.186	0.127			0.107	0.105	0.12	0.095	0.14	0.093	0.231	0.291	0.157	0.452	0.409	0.105
1e-05	0.142	0.081	0.137	0.096			0.105	0.081	0.122	0.075	0.127	0.08	0.137	0.102	0.141	0.079	0.14	0.077
1e-06	0.146	0.083	0.14	0.09			0.132	0.089	0.119	0.079	0.189	0.08	0.141	0.076	0.121	0.083	0.144	0.102
