# Supplementary figures and images for: T cells discriminate between groups C1 and C2 HLA-C
Source: eLife journal article supplement (doi:10.7554/elife.75670), 2022-05-19

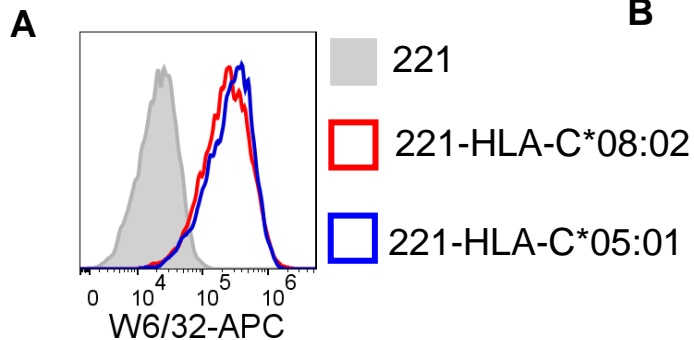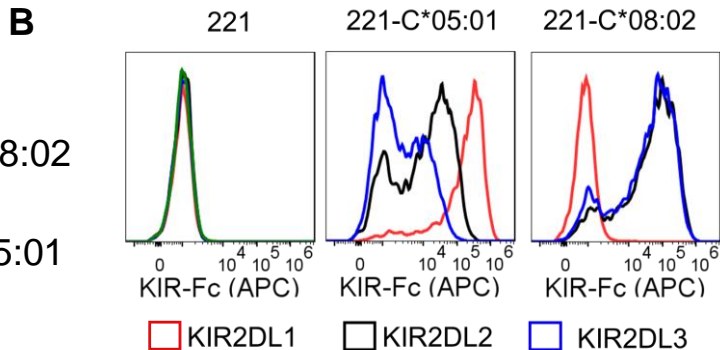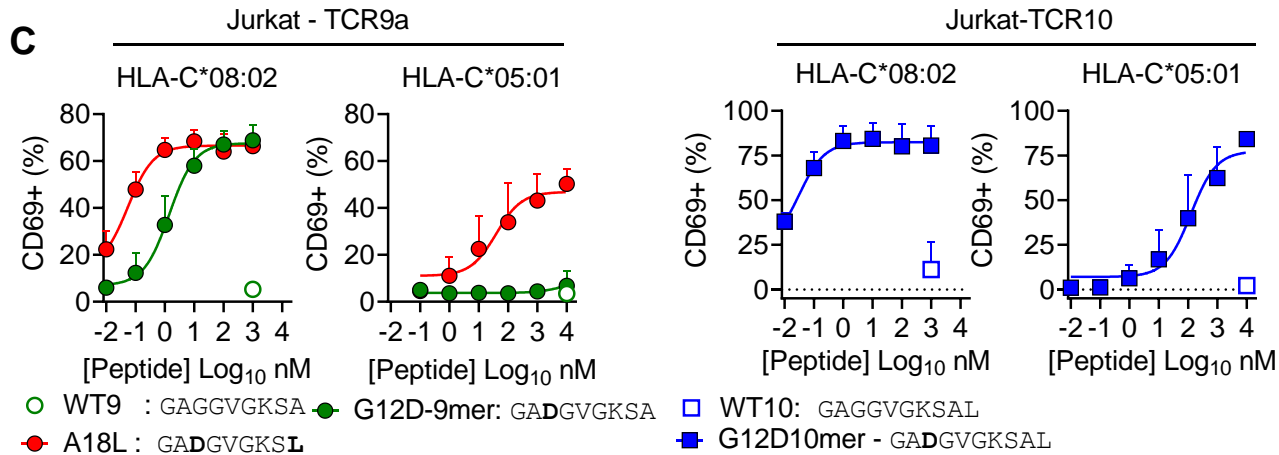

Supplement: supp [file elife_poa_e75670_Figure_1_figure_supplement_1.pdf › elife_poa_e75670_Figure_1_figure_supplement_1.pdf]

# A

## TCR9a over HLA-C\*05:01-G12D-A18L-9mer

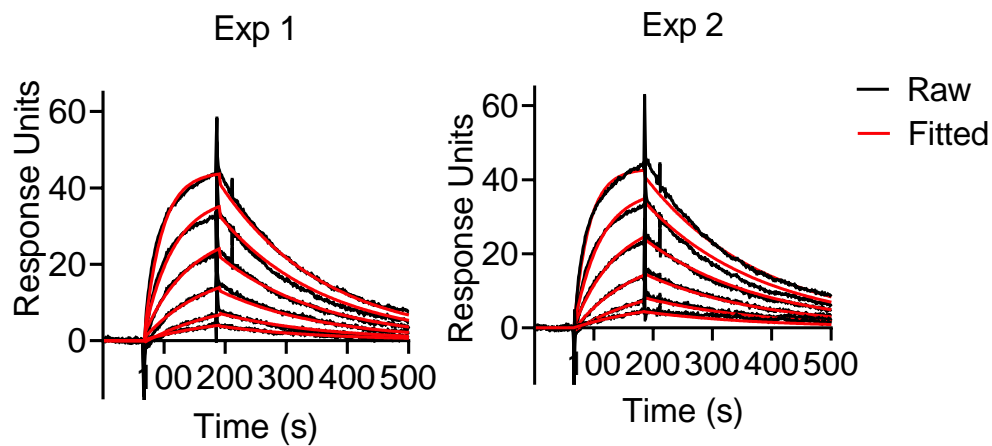

# B

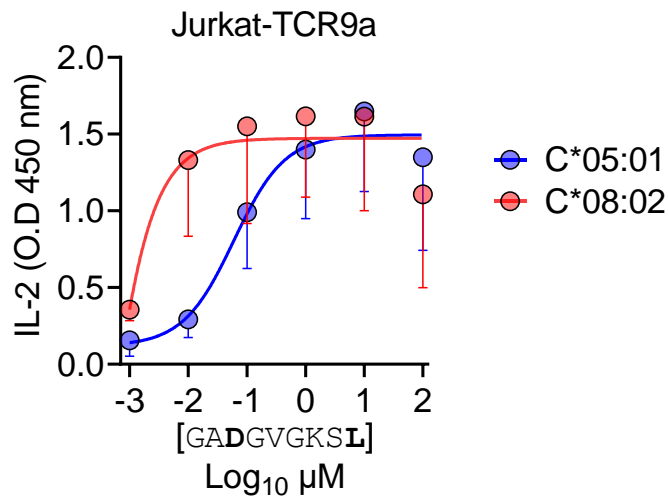

Supplement: supp [file elife_poa_e75670_Figure_3_figure_supplement_1.pdf › elife_poa_e75670_Figure_3_figure_supplement_1.pdf]

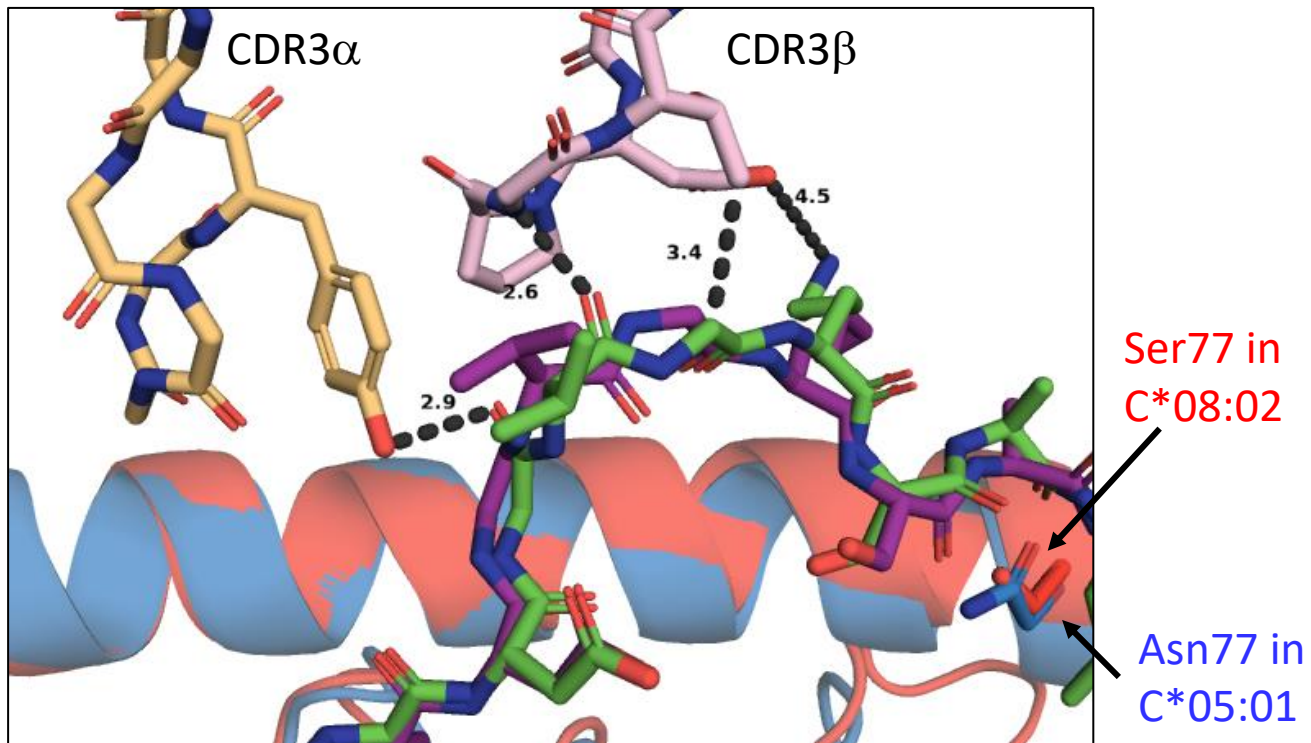

G12D-10mer in C\*08:02 in complex with TCR10

G12D-10mer in C\*05:01

Supplement: supp [file elife_poa_e75670_Figure_4_figure_supplement_1.pdf › elife_poa_e75670_Figure_4_figure_supplement_1.pdf]

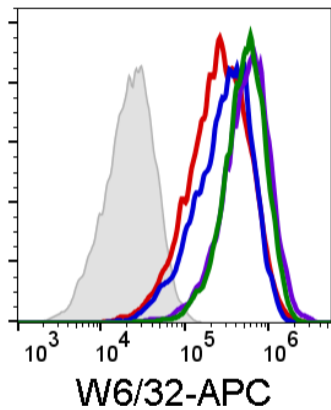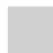

221

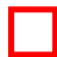

221-C\*08

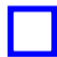

221-C\*05

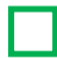

221-C\*05-N77S

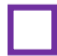

221-C\*05-K80N

Supplement: supp [file elife_poa_e75670_Figure_5_figure_supplement_1.pdf › elife_poa_e75670_Figure_5_figure_supplement_1.pdf]

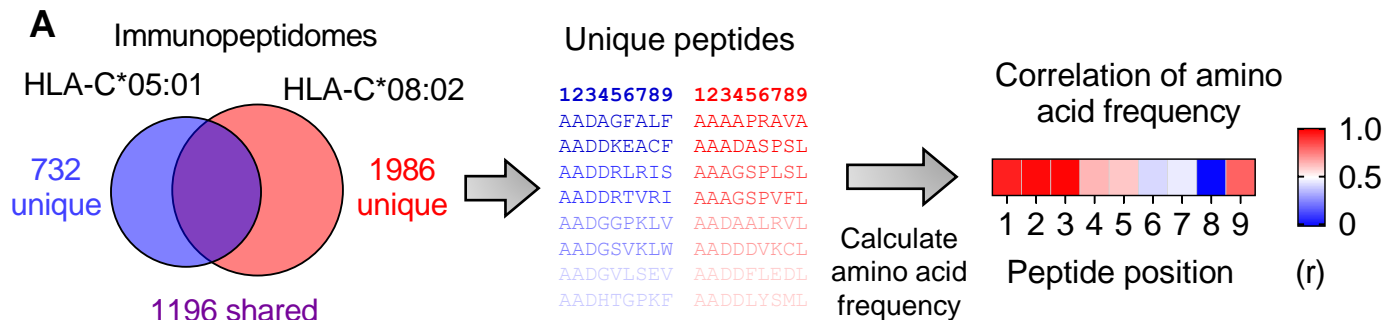

**B** Amino acid frequency at p9 (pΩ-1) of 10mers

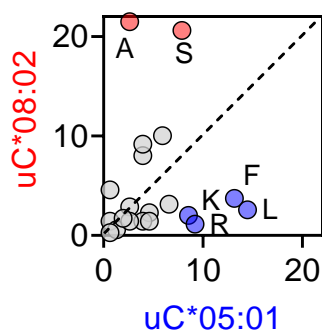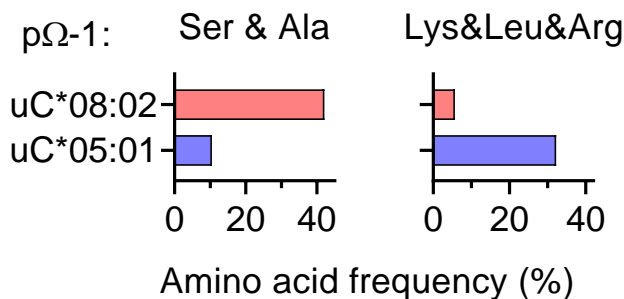

**C**

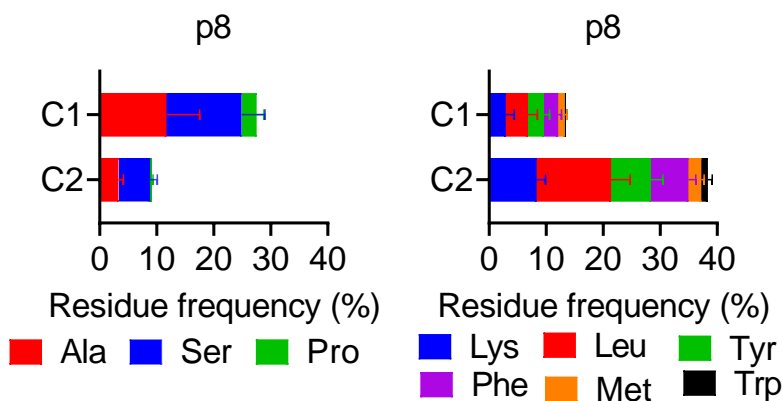

**D**

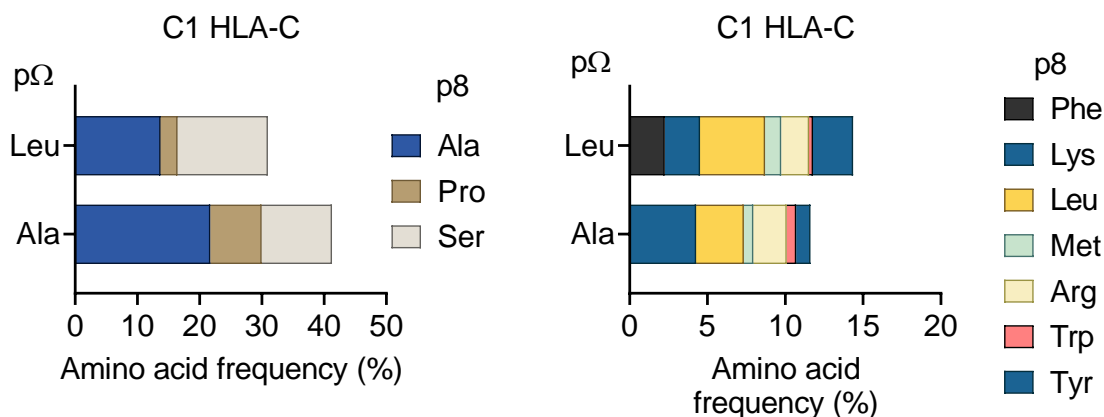

Supplement: supp [file elife_poa_e75670_Figure_6_figure_supplement_1.pdf › elife_poa_e75670_Figure_6_figure_supplement_1.pdf]
